# Supplementary material for: Differential Expression of Chemokine and Matrix Re-Modelling Genes Is Associated with Contrasting Schistosome-Induced Hepatopathology in Murine Models
Source: PLoS Negl Trop Dis. 2011 Jun 7;5(6):e1178. doi: 10.1371/journal.pntd.0001178 (PMC3110159; doi:10.1371/journal.pntd.0001178)
Supplement: Table S1 — Fold changes and standard deviation of all genes (first 21,986) examined by microarray analysis in BALB/c and CBA mice. Data is expressed as fold change relative to uninfected controls of the same strain. This gene list has not been filtered for significant signal relative to background or for statistical significance. (XLS) [file pntd.0001178.s001.xls]

## Sheet: Sheet1
							BALB/c							CBA
					4 weeks		7 weeks		9 weeks			4 weeks		7 weeks		9 weeks
Probe_Id	Accession	Symbol	Synonyms	Definition	Fold change	Standard Deviation	Fold change	Standard Deviation	Fold change	Standard Deviation		Fold change	Standard Deviation	Fold change	Standard Deviation	Fold change	Standard Deviation
ILMN_1212602	NM_011913.1	Best1	Vmd2; mBest1; BMD	Mus musculus bestrophin 1 (Best1), mRNA.	1.01463	0.0201836	-1.05267	0.175861	1.00743	0.099641		-1.00048	0.134909	1.15104	0.0406134	1.10303	0.0457329
ILMN_1212603	XM_356543.1	LOC382513			-1.09196	0.0609551	-1.07848	0.0400878	-1.07123	0.0993944		-1.11488	0.0355637	-1.07432	0.0709253	-1.04372	0.056232
ILMN_1212605	XR_035441.1	1500011K16Rik		PREDICTED: Mus musculus RIKEN cDNA 1500011K16 gene (1500011K16Rik), misc RNA.	1.01248	0.158744	-1.37822	0.0875042	-1.32077	0.150703		1.15551	0.313634	-1.20073	0.169236	-1.16331	0.10901
ILMN_1212607	NM_009950.2	Cradd	RAIDD	Mus musculus CASP2 and RIPK1 domain containing adaptor with death domain (Cradd), mRNA.	-1.1355	0.120135	-1.09683	0.0416429	-1.20368	0.060065		-1.12362	0.0874759	-1.07669	0.0950914	-1.16533	0.103016
ILMN_1212612	NM_207649.1	Rcan2	MCIP2; ZAKI-4; Csp2; Dscr1l1	Mus musculus regulator of calcineurin 2 (Rcan2), transcript variant 1, mRNA.	-1.30027	0.163728	1.00747	0.39141	-1.84613	0.346721		-1.25381	0.0187604	-1.65351	0.092385	1.07986	0.429846
ILMN_1212614	AK047743.1	scl0002023.1_27			1.081	0.198173	1.02722	0.234939	1.04769	0.0315496		-1.05321	0.0377862	-1.16415	0.0513887	-1.0629	0.0982627
ILMN_1212619	NM_027756.3	Mfap3l	NYD-sp9; 5430405D20Rik; AW125052; AI461995; 4933428A15Rik; mKIAA0626	Mus musculus microfibrillar-associated protein 3-like (Mfap3l), mRNA.	-1.15685	0.187122	1.04044	0.109717	-1.14302	0.279694		1.02522	0.0503113	-1.09493	0.0765962	1.02285	0.139576
ILMN_1212623	XM_354561.1	LOC380654			1.06219	0.0945688	-1.00467	0.0895432	1.08316	0.0832798		-1.13102	0.0873407	-1.13072	0.133673	-1.13288	0.144835
ILMN_1212625	NM_001005767.3	Parl	PSENIP2; Psarl; D16Ertd607e; PSARL1; PRO2207	Mus musculus presenilin associated, rhomboid-like (Parl), mRNA.	-1.03114	0.14103	-1.29177	0.0563093	-1.21377	0.0640945		-1.00572	0.222314	-1.29026	0.0667078	-1.29919	0.155218
ILMN_1212626	XM_982986.2	EG665509		PREDICTED: Mus musculus predicted gene, EG665509 (EG665509), mRNA.	1.18063	0.218411	3.67738	3.19515	4.59037	2.86437		1.15773	3.18868	5.65177	1.68321	4.94028	1.85798
ILMN_1212628	NM_183289.2	Tcerg1l	5730476P14Rik; MGC130171; MGC130172	Mus musculus transcription elongation regulator 1-like (Tcerg1l), mRNA.	-1.04667	0.142883	-1.26507	0.062583	-1.15458	0.206502		1.01081	0.13416	1.05803	0.237813	1.04212	0.0670265
ILMN_1212632	NM_177718.3	1600021P15Rik	A430031N04; C87006; MGC103296	Mus musculus RIKEN cDNA 1600021P15 gene (1600021P15Rik), mRNA.	1.161	0.169973	1.18766	0.242014	1.18377	0.200104		-1.10067	0.0864218	-1.08901	0.0502539	-1.12008	0.187297
ILMN_1212633	XM_124565.3	LOC231444			-1.0435	0.315321	-1.21389	0.264584	-1.31674	0.11969		1.02132	0.115628	-1.02035	0.034387	-1.13797	0.140056
ILMN_1212636	NM_011499.2	Strap	C78091; C79202; AW557906; Unrip	Mus musculus serine/threonine kinase receptor associated protein (Strap), mRNA.	-1.04978	0.073531	-1.02084	0.118404	-1.19706	0.172003		-1.03727	0.151435	-1.01311	0.177896	-1.27511	0.143318
ILMN_1212637	NM_027400.2	Lman1	gp58; AU043785; MR60; MCFD1; 2610020P13Rik; C730041J05; F5F8D; P58; ERGIC53; AI326273	Mus musculus lectin, mannose-binding, 1 (Lman1), mRNA.	-1.05092	0.183924	-1.73895	0.1055	-1.83868	0.183291		-1.4219	0.114537	-1.45765	0.106878	-1.41418	0.300342
ILMN_1212638	XM_145374.2	LOC232890			-1.10121	0.121273	-1.04893	0.15639	1.16587	0.167753		-1.14915	0.0650919	1.07087	0.0183989	1.05535	0.182142
ILMN_1212639	AK009826	2310045L10Rik			-1.08482	0.162797	-1.36721	0.0430895	-1.539	0.121886		-1.15577	0.164944	-1.2972	0.152837	-1.15381	0.188317
ILMN_1212644	NM_177698.2	D430018P08			-1.03304	0.0743719	-1.10324	0.0517206	-1.13181	0.0566121		1.12123	0.170809	-1.0588	0.102082	1.08588	0.213315
ILMN_1212645	NM_144512.2	Slc6a13	Gabt3; GAT3	Mus musculus solute carrier family 6 (neurotransmitter transporter, GABA), member 13 (Slc6a13), mRNA.	-1.07076	0.0489439	-1.53603	0.172365	-1.29626	0.214466		-1.08245	0.274215	-1.98311	0.00346811	-1.7133	0.154803
ILMN_1212646	NM_016683.1	Zkscan5	hKraba1; AI132486; AI326970; Zfp95	Mus musculus zinc finger with KRAB and SCAN domains 5 (Zkscan5), mRNA.	-1.00026	0.0661845	-1.14106	0.184499	-1.10741	0.0985924		-1.07833	0.0214615	-1.35173	0.0678172	-1.18268	0.126579
ILMN_1212648	NM_172877.2	4732496O08Rik	AU023234	Mus musculus RIKEN cDNA 4732496O08 gene (4732496O08Rik), mRNA.	1.0028	0.115277	1.02104	0.0981375	1.1394	0.0183539		1.12278	0.052203	1.03208	0.0721042	1.07239	0.215873
ILMN_1212649	NM_027375.2	Gcc2	0610043A03Rik; 2600014C01Rik; 2210420P05Rik; AW112121; mKIAA0336	Mus musculus GRIP and coiled-coil domain containing 2 (Gcc2), mRNA.	-1.3578	0.256502	-2.06554	0.189743	-2.03914	0.183792		-1.00224	0.296792	-1.34757	0.190576	-1.64257	0.123068
ILMN_1212650	XM_357271.1	LOC383811			-1.00897	0.0171742	-1.13556	0.00590071	-1.05594	0.170677		1.12128	0.109723	-1.01788	0.0991012	1.09525	0.0204644
ILMN_1212652	AK034003	9330137I11Rik			1.04878	0.0447672	-1.01254	0.123149	-1.09812	0.0986286		-1.08057	0.0603032	-1.12163	0.123078	-1.08643	0.102356
ILMN_1212653	NM_028713.1	Rftn2	3222401M22Rik; KIAA0084; 2700010E02Rik	Mus musculus raftlin family member 2 (Rftn2), mRNA. XM_920263 XM_986521 XM_986556 XM_986596 XM_986637 XM_986673	1.02218	0.063893	1.18537	0.0818656	1.62615	0.165247		-1.10722	0.092307	1.19662	0.138264	1.10976	0.425821
ILMN_1212660	XM_358059.1	LOC385110			-1.08606	0.111448	-1.03201	0.0590026	-1.10365	0.0657207		-1.10274	0.0162525	-1.13329	0.0423051	-1.14302	0.0569378
ILMN_1212663	AK013969	3110001O07Rik			1.00161	0.00453692	-1.06427	0.23238	-1.09386	0.068467		-1.02373	0.0666917	-1.46987	0.0978873	-1.38668	0.424362
ILMN_1212664	XM_001472783.1	1700041I07Rik		PREDICTED: Mus musculus RIKEN cDNA 1700041I07 gene (1700041I07Rik), mRNA.	1.11316	0.0600887	-1.06696	0.119617	-1.01829	0.0515492		1.06103	0.0741039	-1.00254	0.0165077	-1.06896	0.103583
ILMN_1212667	AK033420	9030018K07Rik			-1.09471	0.10707	-1.26061	0.0269344	-1.03722	0.171751		-1.12755	0.118754	-1.05099	0.184821	-1.07501	0.149125
ILMN_1212668	XM_142623.3	LOC245147			-1.0515	0.0458373	-1.05971	0.0672664	-1.09848	0.126637		-1.09241	0.0142207	-1.13147	0.0351532	-1.15134	0.0835404
ILMN_1212669	AK041911	A630046I07Rik			-1.10717	0.100952	-1.26849	0.0864623	-1.17579	0.0515686		-1.028	0.0979478	-1.17962	0.109929	-1.17001	0.0266295
ILMN_1212670	NM_025729.3	Map3k7ip3	KIAA4135; 4921526G09Rik; mKIAA4135; RP23-181A7.1	Mus musculus mitogen-activated protein kinase kinase kinase 7 interacting protein 3 (Map3k7ip3), mRNA.	-1.07709	0.113761	-1.00215	0.0616581	1.02682	0.0727398		1.03062	0.052813	1.00896	0.130532	-1.01854	0.171819
ILMN_1212672	NM_023479.1	Elac2	1110017O07Rik; D11Wsu80e; Hpc2	Mus musculus elaC homolog 2 (E. coli) (Elac2), mRNA.	-1.16866	0.0895989	-1.42556	0.0797756	-1.15045	0.0694307		1.04781	0.217343	-1.17757	0.106008	-1.06894	0.0725733
ILMN_1212678	XM_139384.3	LOC239370			-1.02123	0.0663828	1.02357	0.147333	-1.01454	0.0689081		1.01114	0.0408157	-1.01908	0.143588	1.01898	0.0865313
ILMN_1212682	XM_001475220.1	LOC100045940		PREDICTED: Mus musculus similar to transcription factor mammalian MafA (LOC100045940), mRNA.	1.03089	0.0800699	-1.01415	0.0985678	1.18304	0.388667		-1.1399	0.0966471	1.00525	0.148231	1.01207	0.116556
ILMN_1212683	NM_025850.2	Fank1	AI850911; 1700007B22Rik	Mus musculus fibronectin type 3 and ankyrin repeat domains 1 (Fank1), mRNA.	-1.1238	0.0919242	-1.10587	0.117269	-1.17851	0.148605		-1.10436	0.0227531	-1.14184	0.137799	-1.05721	0.097101
ILMN_1212684	XM_358404.1	LOC380688			-1.10005	0.0289612	-1.16312	0.0508522	-1.05003	0.0893958		1.03325	0.0893469	-1.10186	0.0677657	1.0865	0.0880667
ILMN_1212685	NM_008977.2	Ptpn2	TC-PTP; Ptpt; AI325124	Mus musculus protein tyrosine phosphatase, non-receptor type 2 (Ptpn2), mRNA.	-1.16524	0.0781453	1.04352	0.100092	-1.19866	0.104074		1.08672	0.0931383	-1.10518	0.0790143	1.05625	0.146919
ILMN_1212689	AK039919	Atp8a1			1.28341	0.190655	1.51712	0.126476	1.42484	0.166932		1.3254	0.162153	1.56256	0.14999	1.37973	0.0443648
ILMN_1212690	XM_896395.2	A030014E15Rik		PREDICTED: Mus musculus RIKEN cDNA A030014E15 gene (A030014E15Rik), mRNA.	-1.27946	0.0905569	-1.14871	0.153554	-1.20095	0.113962		1.04676	0.163571	-1.19961	0.0851174	-1.05527	0.0702805
ILMN_1212692	NM_011950.1	Mapk13	SAPK4; Serk4	Mus musculus mitogen-activated protein kinase 13 (Mapk13), mRNA.	-1.18852	0.0322904	2.25505	0.435558	2.62473	0.794462		1.17785	0.836167	1.59214	0.572447	1.37296	0.898625
ILMN_1212693	NM_175483.5	Snx33	E130307J07Rik	Mus musculus sorting nexin 33 (Snx33), mRNA.	1.05438	0.118436	1.20762	0.305805	1.50939	0.277524		-1.15346	0.217578	-1.19907	0.214725	-1.0423	0.518666
ILMN_1212695	NM_030720.1	Gpr84	EX33	Mus musculus G protein-coupled receptor 84 (Gpr84), mRNA.	1.15085	0.103027	3.06841	0.47671	2.54771	0.436527		1.24465	1.21402	1.76849	1.0352	1.38355	1.52086
ILMN_1212698	NM_009667.2	Ampd3		Mus musculus AMP deaminase 3 (Ampd3), mRNA.	-1.04568	0.103021	1.03033	0.119661	-1.01581	0.115313		1.06664	0.0788182	1.07546	0.0454829	1.14288	0.0555042
ILMN_1212702	NM_008218.2	Hba-a1	Hba1	Mus musculus hemoglobin alpha, adult chain 1 (Hba-a1), mRNA.	1.33261	0.980303	3.27378	1.19071	4.23769	1.52649		-1.52998	2.66934	1.30739	2.23964	-1.15727	2.62977
ILMN_1212703	NM_021284.4	Kras	Ki-ras; MGC7141; p21B; K-ras; Kras-2; ras; Kras2; AI929937	Mus musculus v-Ki-ras2 Kirsten rat sarcoma viral oncogene homolog (Kras), mRNA.	-1.49133	0.0266763	-2.3434	0.0342249	-2.29005	0.0254478		-1.04997	0.345021	-2.07312	0.109939	-1.63421	0.231986
ILMN_1212704	NM_001017427.1	Rasef	BC030882; RAB45	Mus musculus RAS and EF hand domain containing (Rasef), mRNA.	-1.00944	0.13741	-1.0788	0.108955	-1.08727	0.17297		1.08421	0.139339	-1.0978	0.102076	1.02143	0.0918715
ILMN_1212708	NM_029614.3	Prss23	Spuve; AI790574; 2310046G15Rik; 4930479H08Rik	Mus musculus protease, serine, 23 (Prss23), mRNA.	-1.13356	0.0592381	1.00915	0.142399	1.00393	0.0115483		1.02903	0.0294422	-1.10375	0.00181242	-1.04592	0.106367
ILMN_1212711	AK045775	Hsd17b11			-1.16502	0.156538	-1.20711	0.0793152	-1.15211	0.1284		-1.14019	0.0627933	-1.27028	0.0436147	-1.2699	0.0785365
ILMN_1212714	NM_178921	AI987712			1.04672	0.142004	-1.04338	0.182892	1.05733	0.076181		-1.09711	0.0705608	-1.39837	0.141083	-1.09435	0.130896
ILMN_1212716	NM_172050.2	Cd300e	CLM2; MGC49720; MGC31495; BC034097; Cd300le; TREM5	Mus musculus CD300e antigen (Cd300e), mRNA.	-1.00866	0.106887	1.0132	0.0592301	-1.05817	0.232075		1.24811	0.0760047	1.02269	0.0909935	1.16347	0.105843
ILMN_1212717	NM_009372.2	Tgif1	AA959811; AI462167; Tgif	Mus musculus TG interacting factor 1 (Tgif1), mRNA.	1.00584	0.116833	1.23234	0.106287	1.2248	0.110825		-1.35544	0.138608	1.22904	0.14592	1.15285	0.192371
ILMN_1212720	NM_080469.2	Prnpip1	PINT1	Mus musculus prion protein interacting protein 1 (Prnpip1), mRNA.	-1.10023	0.0891488	-1.07852	0.160842	1.0803	0.180727		-1.05168	0.121858	-1.13536	0.0790485	-1.2671	0.300574
ILMN_1212724	NM_020597.2	Msmb	PIP; beta-MSP; PSP94	Mus musculus beta-microseminoprotein (Msmb), mRNA.	-1.01714	0.0724709	1.00339	0.118314	1.01509	0.0825192		-1.1397	0.062892	-1.03396	0.0426019	1.0871	0.0407833
ILMN_1212729	XM_357223.1	LOC383750			-1.01046	0.072938	-1.0343	0.0365439	-1.07832	0.0781795		-1.03605	0.044694	-1.01531	0.0441237	-1.01625	0.0607681
ILMN_1212730	NM_018809	Ptf1a			1.00453	0.0797613	-1.04512	0.106635	1.04723	0.0887544		-1.10489	0.0739247	-1.27566	0.14773	-1.10172	0.0967822
ILMN_1212732	NM_030077.1	5330430C04Rik			-1.04169	0.0572863	-1.10214	0.0184969	-1.02437	0.0783337		-1.05638	0.105493	1.00631	0.120003	1.10762	0.0821124
ILMN_1212733	AK044512	Rhoip3-pending			1.1266	0.139101	1.01112	0.108432	-1.05422	0.104329		1.052	0.0955378	-1.16425	0.153399	-1.04142	0.0481844
ILMN_1212734	NM_053072	Fgd6			-1.19781	0.143643	-1.5655	0.130523	-1.68012	0.0687357		1.03069	0.209126	-1.58156	0.0271183	-1.56092	0.0532065
ILMN_1212739	NM_013547.2	Hgd	aku	Mus musculus homogentisate 1, 2-dioxygenase (Hgd), mRNA.	-1.07481	0.0710017	-1.66861	0.202686	-2.04791	0.122101		-1.00248	0.29568	-2.02308	0.0646179	-1.61638	0.0931653
ILMN_1212745	NM_010488.1	Elavl4			1.05171	0.0818297	1.11723	0.110031	1.25972	0.138814		1.15179	0.0516475	1.16392	0.101127	1.13176	0.189974
ILMN_1212748	XM_001479996.1	LOC100048316		PREDICTED: Mus musculus hypothetical protein LOC100048316 (LOC100048316), mRNA.	-1.01565	0.0278995	-1.06323	0.0338337	-1.06353	0.103371		-1.00393	0.110502	-1.03829	0.160358	-1.10031	0.0160207
ILMN_1212752	NM_010750.2	Mab21l1	AW047968	Mus musculus mab-21-like 1 (C. elegans) (Mab21l1), mRNA.	1.04392	0.0891525	-1.02027	0.114826	1.01356	0.0586299		-1.04148	0.0710321	-1.09564	0.035518	1.01072	0.0251474
ILMN_1212755	XM_903363.2	LOC630242		PREDICTED: Mus musculus similar to Ig heavy chain V region MC101 precursor (LOC630242), mRNA.	-1.12678	0.0588909	3.4471	6.37066	9.0862	11.6168		-1.01303	3.15731	19.8964	57.9406	4.29591	1.87725
ILMN_1212759	NM_001085408.1	Sdccag3	C330016H24Rik; C630038K21Rik; RP23-306D20.6	Mus musculus serologically defined colon cancer antigen 3 (Sdccag3), transcript variant 4, mRNA.	1.10777	0.0235826	1.2681	0.0641507	1.15363	0.00533561		-1.1262	0.24374	1.07479	0.221039	1.18386	0.0591571
ILMN_1212762	NM_146840.1	Olfr545	MOR42-1; MGC129241	Mus musculus olfactory receptor 545 (Olfr545), mRNA.	1.004	0.170562	-1.14728	0.100791	-1.03588	0.226622		1.08931	0.11593	-1.0727	0.0863339	1.13013	0.172106
ILMN_1212768	XR_033380.1	LOC545750		PREDICTED: Mus musculus similar to solute carrier family 35, member A4 (LOC545750), misc RNA.	1.03783	0.172187	1.2467	0.0415992	1.33714	0.265442		-1.02187	0.20923	1.08784	0.170053	-1.06378	0.363754
ILMN_1212772	AK020778	A430106P18Rik			1.03497	0.156613	-1.12321	0.0694183	-1.22405	0.0515296		-1.10108	0.114148	-1.10399	0.0822837	-1.18773	0.0767416
ILMN_1212775		B230112I24Rik			1.00628	0.0344772	1.04339	0.101254	-1.03169	0.141176		1.11801	0.132607	1.01815	0.119053	1.09832	0.0907306
ILMN_1212777		IGKV4-75_AJ231227_Ig_kappa_variable_4-75_15			-1.01946	0.0329998	1.13813	0.120904	1.08041	0.0363056		-1.02859	0.0715219	1.02318	0.0309793	-1.03561	0.14435
ILMN_1212782	NM_026290.2	4930511I11Rik	AV041658	Mus musculus RIKEN cDNA 4930511I11 gene (4930511I11Rik), mRNA.	1.02564	0.0785817	-1.10808	0.106713	-1.01946	0.0856298		-1.0963	0.0508087	1.00274	0.225519	-1.0896	0.0613216
ILMN_1212791	NM_029956.2	Mmab	ATR; 9130222L19Rik	Mus musculus methylmalonic aciduria (cobalamin deficiency) type B homolog (human) (Mmab), mRNA.	1.29968	0.0505926	1.06993	0.0722648	1.06462	0.110474		-1.01079	0.072997	1.0675	0.0722681	-1.12104	0.159348
ILMN_1212794	NM_010376.3	H13	Spp; H-13; AV020344; 4930443L17Rik; 1200006O09Rik; 5031424B04Rik; PSL3	Mus musculus histocompatibility 13 (H13), mRNA.	1.17396	0.0996911	1.4487	0.230478	1.45108	0.257779		-1.10636	0.482712	1.08099	0.379562	1.02501	0.759011
ILMN_1212796	AK054150	Mrc2			-1.31774	0.0345433	-1.10263	0.080099	-1.12215	0.122226		1.10103	0.139371	-1.0345	0.0703815	1.00145	0.0475128
ILMN_1212797	AK038038	Synj2			-1.09834	0.115719	1.02858	0.0636489	1.04306	0.077249		-1.12076	0.0431256	-1.10499	0.118453	-1.1052	0.155646
ILMN_1212799	NM_139303.1	Kif18a	MGC27627; AU024633; B130001M12Rik	Mus musculus kinesin family member 18A (Kif18a), mRNA.	-1.23082	0.107999	-1.13652	0.0880875	-1.25832	0.106641		1.10773	0.0934929	1.0124	0.249408	-1.02345	0.124014
ILMN_1212800	XM_357940.1	LOC384920			-1.07895	0.131586	1.03522	0.17098	-1.12418	0.0689255		-1.06422	0.0577842	-1.09973	0.0654045	-1.18465	0.115085
ILMN_1212801		9330162L04Rik			-1.11314	0.0993896	1.25272	0.0880048	1.28079	0.187976		-1.10447	0.317369	1.20012	0.249487	1.16358	0.0424285
ILMN_1212804	NM_008900.2	Pou3f3	Otf8; Skin1; Brn1; Brn-1	Mus musculus POU domain, class 3, transcription factor 3 (Pou3f3), mRNA.	-1.13548	0.0416108	-1.05731	0.108759	-1.06886	0.131395		-1.00393	0.0552541	-1.02602	0.0579418	1.01596	0.119627
ILMN_1212806	XM_483915	Plekhk1			1.01632	0.0768321	-1.01014	0.127055	1.01123	0.0504661		1.01624	0.0733759	-1.10431	0.101559	-1.00433	0.0680499
ILMN_1212809	AK083047	C530038F07Rik			1.09221	0.055283	-1.00644	0.0771008	-1.0434	0.0432074		-1.02572	0.0210859	1.03666	0.118472	-1.10357	0.103038
ILMN_1212812	NM_012044.2	Pla2g2e		Mus musculus phospholipase A2, group IIE (Pla2g2e), mRNA.	-1.01089	0.107859	1.08041	0.14939	1.04029	0.0353847		-1.02851	0.0369429	-1.05834	0.0340705	-1.03991	0.17845
ILMN_1212815	XM_204252.2	LOC277927			1.0426	0.0804086	-1.05789	0.0925222	1.01574	0.0774685		-1.02823	0.040678	-1.08859	0.0970329	-1.09281	0.261937
ILMN_1212818	AK086041	D830048B13Rik			1.00899	0.0563803	-1.05084	0.0357608	-1.06712	0.0203426		-1.13617	0.0665944	-1.07926	0.0457025	-1.04352	0.0667372
ILMN_1212823	NM_013845.4	Ror1	Ntrkr1; mRor1; 2810404D04Rik	Mus musculus receptor tyrosine kinase-like orphan receptor 1 (Ror1), mRNA.	-1.03714	0.153974	-1.04898	0.0402744	-1.19033	0.123396		-1.12988	0.115827	-1.06242	0.101691	1.02949	0.149844
ILMN_1212825	XM_127892.2	LOC223263			-1.09412	0.0541135	-1.13329	0.113723	-1.17487	0.0812522		-1.14382	0.0472385	-1.01722	0.132868	-1.14975	0.0543393
ILMN_1212828	NM_173396.2	Tgif2	4921501K24; C81206; C80753; 5730599O09Rik	Mus musculus TGFB-induced factor 2 (Tgif2), mRNA.	1.05231	0.209561	1.07161	0.094065	1.05151	0.0221186		-1.02642	0.085826	1.04061	0.0420311	1.02444	0.0755037
ILMN_1212831	NM_145944	2610528H13Rik			-1.05799	0.162505	-1.13923	0.0357306	-1.09873	0.187643		1.01608	0.0821176	-1.0079	0.0883655	1.10546	0.0932439
ILMN_1212835	NM_145079.2	Ugt1a6a	UGT1.6; Ugt1a6; Ugt1a7	Mus musculus UDP glucuronosyltransferase 1 family, polypeptide A6A (Ugt1a6a), mRNA.	-1.15275	0.218882	-1.55243	0.207424	-1.72427	0.192218		1.27755	0.492004	-1.75581	0.126631	-2.22624	0.0187786
ILMN_1212836	NM_011210.2	Ptprc	Ly-5; Lyt-4; T200; Cd45; CD45R; loc; B220	Mus musculus protein tyrosine phosphatase, receptor type, C (Ptprc), mRNA.	1.32152	0.255894	1.60422	0.488226	1.28329	0.716512		1.31181	0.511779	1.81927	0.506637	1.47157	0.313404
ILMN_1212838	XM_194114.3	Lrig2			-1.00944	0.0872263	-1.13992	0.0838223	-1.10196	0.0349319		-1.04685	0.123267	-1.00798	0.102088	-1.051	0.032206
ILMN_1212840	NM_178607.3	Rnf24	D2Ertd504e; 4930505A13Rik; AI317164; 2810473M14Rik; C86507	Mus musculus ring finger protein 24 (Rnf24), mRNA.	-1.01301	0.11176	-1.00284	0.121412	1.06143	0.205941		1.02747	0.0765767	-1.07107	0.126734	-1.21744	0.070207
ILMN_1212842	XM_001480162.1	Fer1l3		PREDICTED: Mus musculus fer-1-like 3, myoferlin (C. elegans), transcript variant 1 (Fer1l3), mRNA.	1.11697	0.112483	1.01159	0.0436669	1.02579	0.0606613		1.00884	0.0155331	1.02005	0.0218766	1.04848	0.0540546
ILMN_1212847	NM_029235	4930556L07Rik			1.06274	0.0850697	1.04484	0.0684477	1.01516	0.11235		1.02932	0.0447989	-1.04451	0.0571179	-1.05678	0.125017
ILMN_1212848	NM_019743.3	Rybp	YEAF1; 2410018J24Rik; MGC62213	Mus musculus RING1 and YY1 binding protein (Rybp), mRNA.	1.03036	0.0629279	1.57211	0.109941	1.27027	0.0798306		1.10589	0.417256	1.55821	0.177517	1.51567	0.472851
ILMN_1212849	AK036261	9630050A07Rik			1.17907	0.12253	1.1454	0.141213	1.30801	0.160348		1.03874	0.15969	1.05726	0.104479	1.0195	0.323561
ILMN_1212850	NM_023140.4	Glrx3	PICOT	Mus musculus glutaredoxin 3 (Glrx3), mRNA.	-1.08926	0.151488	-1.14719	0.0457567	-1.16123	0.0324675		-1.04943	0.116001	1.01783	0.164529	-1.03299	0.105485
ILMN_1212852	XM_355749.1	LOC381754			1.04071	0.0523942	-1.47198	0.0664214	-1.43434	0.0203703		-1.08258	0.210365	-1.5039	0.0455274	-1.42801	0.0131132
ILMN_1212854	NM_199025.2	Zbtb26	MGC130361; MGC130360; A630026F21Rik	Mus musculus zinc finger and BTB domain containing 26 (Zbtb26), mRNA.	-1.08702	0.0093972	-1.05216	0.116476	-1.02735	0.0776037		1.13226	0.182848	-1.12614	0.0285193	-1.07686	0.0652342
ILMN_1212856	AK041792	Adh5			-1.03306	0.0486713	-1.23384	0.139195	-1.16579	0.0282094		-1.03967	0.134326	-1.11876	0.108648	-1.13228	0.028405
ILMN_1212857	NM_001024927.2	Pitpnm3	AI848332; A330068P14Rik; Gm880	Mus musculus PITPNM family member 3 (Pitpnm3), transcript variant 1, mRNA.	-1.06332	0.110856	-1.0013	0.149311	-1.11985	0.0388607		-1.04736	0.0701749	-1.12039	0.0225607	-1.06761	0.0805052
ILMN_1212860	XM_358635.1	LOC381647			1.02945	0.1371	1.00266	0.184698	-1.04533	0.094497		-1.13022	0.101361	-1.08558	0.0563815	-1.04804	0.0943238
ILMN_1212862	XM_357434.1	LOC384112			-1.05074	0.0506113	-1.15137	0.0942604	-1.08391	0.0300167		-1.04381	0.110667	1.01782	0.184273	-1.02092	0.0952222
ILMN_1212865	XM_358179.1	LOC385303			-1.11071	0.0380188	-1.09474	0.108299	-1.17097	0.0721625		-1.11207	0.0607608	-1.04772	0.0772706	-1.15085	0.112524
ILMN_1212867	XM_001476119.1	LOC100046278		PREDICTED: Mus musculus similar to CRS4C-6 (LOC100046278), mRNA.	1.04612	0.0256429	1.41031	0.21317	1.16214	0.155287		1.00951	0.260094	1.67863	0.454214	1.1767	0.280099
ILMN_1212874	XM_146935.2	LOC235444			1.02315	0.0926907	1.11693	0.0413369	1.08313	0.058298		1.04603	0.0516737	1.15631	0.174674	1.10378	0.115548
ILMN_1212875	NM_172520.2	Arhgef19	WGEF; 6430573B13Rik; 6030432F23	Mus musculus Rho guanine nucleotide exchange factor (GEF) 19 (Arhgef19), mRNA.	1.0479	0.194336	-1.1195	0.320964	-1.10186	0.168194		-1.18323	0.0543405	-1.44761	0.106789	-1.11093	0.377796
ILMN_1212876	AK051891	Tcfcp2			-1.0123	0.0972887	-1.02135	0.0360838	-1.14021	0.142749		-1.08075	0.069363	-1.09653	0.113809	1.00876	0.10378
ILMN_1212878	NM_027622.2	4921530G04Rik	RP23-400P17.8	Mus musculus RIKEN cDNA 4921530G04 gene (4921530G04Rik), mRNA.	1.01511	0.0845318	-1.10646	0.120684	-1.05643	0.144909		-1.12424	0.0878763	-1.1969	0.0316023	-1.00815	0.2089
ILMN_1212883	XM_358510.1	LOC381119			1.06295	0.336122	-1.06246	0.123451	-1.12325	0.0105669		1.0147	0.106121	-1.25273	0.04435	-1.18511	0.00841108
ILMN_1212884	NM_001081406.1	Ppil5	LRR-1; 2410005L11Rik; AU021780	Mus musculus peptidylprolyl isomerase (cyclophilin) like 5 (Ppil5), mRNA.	1.08697	0.0867528	-1.01658	0.106419	-1.04779	0.169175		1.02729	0.120512	-1.13633	0.0421956	-1.02137	0.128695
ILMN_1212886	NM_031385.1	Tex18			-1.05756	0.0500484	1.01797	0.0324935	-1.01723	0.120197		1.07804	0.0457906	-1.02339	0.0717546	-1.12418	0.13992
ILMN_1212889	XM_001473975.1	LOC100045316		PREDICTED: Mus musculus similar to NonO/p54nrb homolog (LOC100045316), mRNA.	1.06757	0.0915998	-1.00438	0.0894567	-1.12251	0.136516		-1.00745	0.136785	-1.11647	0.0116398	-1.09771	0.081488
ILMN_1212890	AK044718	Nr2e3			-1.03349	0.162286	-1.08254	0.00536034	-1.11212	0.0619534		-1.04874	0.025103	-1.13402	0.137877	-1.04943	0.0180434
ILMN_1212894	NM_009806.2	Cask	mLin-2; DXPri1; MGC7449; LIN-2; DXRib1; Pals3	Mus musculus calcium/calmodulin-dependent serine protein kinase (MAGUK family) (Cask), mRNA.	-1.06534	0.0610306	1.0781	0.0281345	-1.25006	0.102837		-1.01958	0.121438	1.20442	0.0713388	1.05009	0.299091
ILMN_1212898	AK087693	E330007H08Rik			1.12363	0.154468	1.0068	0.0970753	1.00278	0.0280038		1.03034	0.0224802	-1.02791	0.0174983	-1.05716	0.110323
ILMN_1212902	NM_009003.2	Rab4a	Rab4; AI848268	Mus musculus RAB4A, member RAS oncogene family (Rab4a), mRNA.	-1.02133	0.0362125	-1.04196	0.174768	1.12293	0.31683		1.05589	0.0996634	-1.17465	0.0476152	-1.02206	0.0591872
ILMN_1212906	NM_007515.2	Slc7a3	SLC7A1; Atrc3; SLC7A2; CAT3	Mus musculus solute carrier family 7 (cationic amino acid transporter, y+ system), member 3 (Slc7a3), mRNA.	-1.0861	0.149096	-1.06882	0.0503202	-1.13316	0.242389		-1.11656	0.0506433	-1.06496	0.0568702	1.05457	0.0210713
ILMN_1212907	NM_175514.2	D430039N05Rik	RP23-141N19.4	Mus musculus RIKEN cDNA D430039N05 gene (D430039N05Rik), mRNA.	-1.02509	0.178205	-1.29473	0.167897	1.18346	0.140353		-1.08598	0.177206	1.1057	0.333388	1.22083	0.252913
ILMN_1212909	AK044522	A930018M19Rik			1.02196	0.170331	-1.14627	0.058032	-1.03453	0.0512331		-1.05403	0.103794	-1.21769	0.0474904	-1.0365	0.0856531
ILMN_1212913	NM_001081423.1	Ttll5	2310009M18Rik; D630041K24Rik; mKIAA0998; 1700048H13Rik; STAMP; AI428864; R75373; 4930556H18Rik	Mus musculus tubulin tyrosine ligase-like family, member 5 (Ttll5), mRNA.	-1.06318	0.0205966	1.00813	0.128619	-1.13484	0.13318		1.00754	0.120072	-1.12495	0.0389269	-1.13643	0.156657
ILMN_1212920	NM_009383.2	Tial1	mTIAR; AL033329; 5330433G13Rik	Mus musculus Tia1 cytotoxic granule-associated RNA binding protein-like 1 (Tial1), mRNA.	1.11684	0.428278	-1.3741	0.0250779	-1.48052	0.245294		-1.29839	0.161651	-1.53702	0.1315	-1.39208	0.183092
ILMN_1212921	NM_146945.1	Olfr345	MOR136-7	Mus musculus olfactory receptor 345 (Olfr345), mRNA.	-1.00566	0.105852	-1.18521	0.0561893	-1.07232	0.0896454		1.01396	0.137422	-1.1361	0.0689383	-1.11329	0.108424
ILMN_1212923	XM_196360.3	LOC269676			1.07597	0.0866942	1.05248	0.102881	-1.10459	0.124441		1.12311	0.0759122	1.04055	0.0827302	1.02309	0.0839714
ILMN_1212927	XM_001479088.1	LOC100047899		PREDICTED: Mus musculus similar to NF-180 (LOC100047899), mRNA.	-1.03255	0.0684508	-1.09599	0.0709387	-1.02749	0.045125		1.09586	0.142539	1.11908	0.218125	1.03719	0.04083
ILMN_1212933	XM_355727.5	Tnrc18		PREDICTED: Mus musculus trinucleotide repeat containing 18 (Tnrc18), mRNA.	1.10516	0.130419	1.03874	0.134006	-1.01369	0.0993078		-1.12436	0.0619321	-1.04603	0.0667041	-1.1981	0.166519
ILMN_1212934	AK018183	6330416L11Rik			-1.23573	0.0752844	-1.25191	0.0926445	-1.32303	0.107228		-1.1092	0.156495	-1.15669	0.132388	-1.28285	0.101684
ILMN_1212935	NM_008055.3	Fzd4	Fz4	Mus musculus frizzled homolog 4 (Drosophila) (Fzd4), mRNA.	-1.12325	0.107978	-1.17201	0.166472	-1.28487	0.111386		1.00923	0.127454	-1.11889	0.0707024	-1.1438	0.0606199
ILMN_1212937	XM_001475011.1	LOC100045840		PREDICTED: Mus musculus hypothetical protein LOC100045840 (LOC100045840), mRNA.	-1.15324	0.035294	-1.74153	0.0322683	-1.4335	0.0310771		-1.15183	0.201912	-1.46004	0.0689134	-1.30858	0.0638321
ILMN_1212938	NM_019467.2	Aif1	G1; AIF-1; D17H6S50E; AI607846; Iba1	Mus musculus allograft inflammatory factor 1 (Aif1), mRNA.	3.3877	1.15979	3.94832	0.204721	1.89232	0.984838		3.30584	0.883035	3.63093	0.316078	2.44547	0.322758
ILMN_1212939	NM_181859.2	Oxct2b	Scot-t2; MGC130507	Mus musculus 3-oxoacid CoA transferase 2B (Oxct2b), mRNA.	1.06033	0.105165	1.10781	0.104971	1.00636	0.0753724		-1.10681	0.211362	1.05747	0.0294901	-1.12426	0.2198
ILMN_1212941	NM_198613.1	Ap2s1	AI043088; MGC62945	Mus musculus adaptor-related protein complex 2, sigma 1 subunit (Ap2s1), mRNA.	1.07181	0.103314	1.25132	0.13468	1.30993	0.10653		-1.07718	0.28253	1.05283	0.209024	-1.20556	0.721599
ILMN_1212945	XM_899015.2	LOC627081		PREDICTED: Mus musculus X-linked lymphocyte-regulated 5-like, transcript variant 2 (LOC627081), mRNA.	-1.00533	0.145412	1.14746	0.159438	1.04905	0.108045		-1.03443	0.24658	-1.11176	0.243779	1.00218	0.130619
ILMN_1212946	AK019991	5730599A22Rik			1.02059	0.0497367	1.07684	0.163297	1.05975	0.0390978		1.06451	0.0521502	-1.06628	0.0393707	1.06218	0.0513494
ILMN_1212949	NM_021607.2	Ncstn	Nct; Aph2; AA727311; 9430068N19Rik; Kiaa0253; mKIAA0253	Mus musculus nicastrin (Ncstn), mRNA.	1.03126	0.0233706	1.01397	0.134607	1.01457	0.0984188		-1.0154	0.0168874	-1.0184	0.109502	-1.2267	0.144233
ILMN_1212953	NM_138628.3	Txlnb	Mdp77; 2310001N14Rik	Mus musculus taxilin beta (Txlnb), mRNA.	1.06683	0.0927208	1.0977	0.196391	-1.07408	0.0468067		1.03574	0.0250698	-1.01471	0.0530426	-1.06182	0.0184012
ILMN_1212954	XM_356815.1	LOC383038			-1.03726	0.0237648	-1.07427	0.0774801	-1.08875	0.0932218		1.00033	0.0429327	-1.07046	0.0348164	-1.03122	0.0765676
ILMN_1212958		A930004J17Rik			-1.1999	0.0657132	-1.35222	0.10241	-1.24986	0.147744		1.08802	0.177176	-1.09502	0.108728	-1.15584	0.126338
ILMN_1212959	NM_172371.3	Slc16a13	RP23-198E14.5; 1700007D07Rik	Mus musculus solute carrier family 16 (monocarboxylic acid transporters), member 13 (Slc16a13), mRNA.	1.13468	0.0394067	1.60078	0.321007	1.22182	0.0629068		1.14056	0.355073	1.05722	0.368118	1.08541	0.317684
ILMN_1212960	XM_355114.1	LOC381186			1.015	0.0890452	-1.08858	0.0338263	-1.00312	0.156082		-1.10134	0.110588	-1.21916	0.181569	-1.09447	0.0750423
ILMN_1212964	XM_001481316.1	BC039210		PREDICTED: Mus musculus cDNA sequence BC039210 (BC039210), mRNA.	1.05979	0.0100686	-1.05402	0.113008	1.00128	0.0381404		1.00885	0.0155058	1.07818	0.179778	1.03134	0.0500043
ILMN_1212965	XM_981814.1	Iqch		PREDICTED: Mus musculus IQ motif containing H, transcript variant 3 (Iqch), mRNA.	-1.03238	0.0378024	-1.05287	0.0345478	-1.13283	0.117013		1.1056	0.166969	-1.05828	0.0198335	-1.02117	0.0734793
ILMN_1212966	NM_021322.1	Wdr4	D530049K22Rik; AI415180; AI448349	Mus musculus WD repeat domain 4 (Wdr4), mRNA.	-1.06281	0.114759	-1.07806	0.0577421	-1.04941	0.0334875		-1.02162	0.0670315	1.00809	0.0613993	-1.02006	0.0669913
ILMN_1212967	AK037993	Igbp1			-1.05038	0.0424798	-1.16658	0.0937656	-1.15046	0.0144082		-1.09541	0.082756	-1.19932	0.0214147	-1.29543	0.099891
ILMN_1212974	XM_285796.2	LOC329824			1.01721	0.0570552	-1.12586	0.0795007	-1.022	0.00890662		-1.04845	0.0585826	-1.09618	0.0837903	1.08046	0.124749
ILMN_1212975	NM_133734.2	Wdr23	0710008A13Rik; D14Ucla1; GLO14; C76035	Mus musculus WD repeat domain 23 (Wdr23), mRNA.	-1.25103	0.411862	-2.29119	0.078745	-1.62414	0.266144		-1.47551	0.216822	-2.5649	0.16604	-2.06813	0.124598
ILMN_1212977	AK038350	A130096P14Rik			-1.02316	0.0688229	-1.03805	0.0401119	-1.06247	0.107583		1.00604	0.0557218	1.03939	0.127486	-1.07531	0.0513897
ILMN_1212980	NM_199222.2	Lman1l	BC020188; MGC28923; slamp	Mus musculus lectin, mannose-binding 1 like (Lman1l), mRNA.	1.03121	0.043318	-1.03939	0.0447579	-1.07737	0.059115		1.06063	0.0541708	-1.09823	0.118326	-1.00754	0.0292691
ILMN_1212982	NM_207671.2	Zfp318	TZF; 2610034E08Rik; D530032D06Rik	Mus musculus zinc finger protein 318 (Zfp318), transcript variant 1, mRNA.	-1.14325	0.0264248	-1.16039	0.0583635	-1.49415	0.161696		-1.00315	0.0713802	-1.18796	0.105029	-1.11071	0.279177
ILMN_1212985	AK052625	Cacna1a			-1.0487	0.0819715	-1.0548	0.105111	-1.01398	0.0331775		1.08286	0.14329	1.03394	0.10083	1.0499	0.0595146
ILMN_1212989	XM_001476780.1	LOC100046770		PREDICTED: Mus musculus similar to histone macroH2A1.2 (LOC100046770), mRNA.	1.08561	0.0691599	1.30731	0.110661	1.35887	0.160294		1.26163	0.0494692	1.41147	0.0875952	1.28565	0.300386
ILMN_1212990	XM_898823.2	Flnc		PREDICTED: Mus musculus filamin C, gamma (actin binding protein 280), transcript variant 2 (Flnc), mRNA.	-1.0798	0.0609804	-1.18044	0.10412	-1.15155	0.16765		1.05084	0.154661	1.0089	0.155068	1.05746	0.0515373
ILMN_1212991	AK014071	3110023E09Rik			1.16011	0.188311	1.22211	0.17815	1.26522	0.145771		1.03091	0.0236477	1.04467	0.137024	-1.00656	0.314466
ILMN_1212992	NM_009803.4	Nr1i3	AI551208; MB67; ESTM32; CAR-beta; CAR; MGC107281; AA209988; Care2	Mus musculus nuclear receptor subfamily 1, group I, member 3 (Nr1i3), mRNA.	-1.69921	0.199798	-2.21316	0.11213	-2.06022	0.170746		-1.36844	0.146142	-3.14937	0.0843181	-2.89152	0.0549094
ILMN_1212993	NM_029945.2	Smpd4	4122402O22Rik; mKIAA1418	Mus musculus sphingomyelin phosphodiesterase 4 (Smpd4), mRNA.	-1.00504	0.170055	-1.11455	0.179972	-1.00468	0.152964		-1.30522	0.0335986	-1.27982	0.0768388	-1.23117	0.104096
ILMN_1212997	NM_176951.3	Xkr5	XRG5; 5430438H03Rik	Mus musculus X Kell blood group precursor-related family, member 5 (Xkr5), mRNA.	-1.02869	0.0578023	1.2195	0.139446	1.08019	0.0347977		1.14483	0.136572	1.08358	0.101528	1.05263	0.161225
ILMN_1212998	NM_011650.3	Tsn	2610034C24Rik; TB-RBP; AU040286	Mus musculus translin (Tsn), mRNA.	-1.04916	0.0741082	-1.03826	0.124404	-1.12277	0.0606115		1.10526	0.211941	-1.15389	0.15074	-1.20013	0.0408027
ILMN_1213001	NM_145439.1	Tmc6	D11Ertd204e; EVER1	Mus musculus transmembrane channel-like gene family 6 (Tmc6), transcript variant 1, mRNA.	1.15747	0.217078	1.99054	0.299286	2.06994	0.170111		1.00036	0.58875	1.47369	0.357619	1.37005	1.14394
ILMN_1213002	NM_029158.2	Cnbp2	4930513O09Rik	Mus musculus cellular nucleic acid binding protein 2 (Cnbp2), mRNA.	1.11373	0.0612744	1.07273	0.167781	1.04945	0.229645		-1.15178	0.129183	-1.13002	0.0986153	-1.23509	0.0118034
ILMN_1213005	XM_981366.1	B230208N19Rik		PREDICTED: Mus musculus RIKEN cDNA B230208N19 gene, transcript variant 1 (B230208N19Rik), mRNA.	-1.15782	0.077608	-1.17806	0.0581467	-1.16404	0.10611		1.03248	0.0669635	-1.05587	0.0740654	-1.01358	0.0471622
ILMN_1213010	NM_177154.2	A330023F24Rik			-1.03773	0.12396	-1.0692	0.111402	-1.01297	0.0275357		1.05863	0.106822	1.00898	0.0538415	-1.09034	0.031451
ILMN_1213014	NM_009471.2	Umps	1700095D23Rik; AA408257; BB164745; AL033308	Mus musculus uridine monophosphate synthetase (Umps), mRNA.	-1.08526	0.20007	-1.49013	0.144073	-1.64811	0.0666047		1.025	0.320623	-1.57344	0.134883	-1.91125	0.179528
ILMN_1213020	XM_485586.4	EG433865		PREDICTED: Mus musculus predicted gene, EG433865 (EG433865), mRNA.	1.25351	0.438894	1.50704	1.12431	1.81153	0.780628		1.17471	0.0823206	2.36268	0.430739	2.13987	0.679139
ILMN_1213024	NM_009718.2	Neurog2	ngn-2; ngn2; Math4A; Atoh4	Mus musculus neurogenin 2 (Neurog2), mRNA.	-1.06642	0.0296869	-1.10384	0.0859877	1.01231	0.10179		-1.03334	0.0409437	-1.06746	0.0698988	-1.03431	0.279391
ILMN_1213026	NM_146105.3	9630058J23Rik	MGC31547	Mus musculus RIKEN cDNA 9630058J23 gene (9630058J23Rik), mRNA.	-1.43087	0.0527153	-1.15277	0.14271	-1.10899	0.127594		1.24475	0.183781	-1.37715	0.066216	-1.28218	0.152039
ILMN_1213028	XM_914729.2	1700106J16Rik		PREDICTED: Mus musculus RIKEN cDNA 1700106J16 gene (1700106J16Rik), mRNA.	-1.00585	0.0674216	1.00928	0.101045	1.01705	0.0538334		-1.04809	0.08243	-1.06049	0.0480481	-1.01301	0.0728199
ILMN_1213030	NM_009006.2	Map4k2	AI385662; GCK; Rab8ip; MGC143893; BL44; MGC143894	Mus musculus mitogen-activated protein kinase kinase kinase kinase 2 (Map4k2), mRNA.	1.05563	0.224049	1.55873	0.191838	1.48669	0.039106		1.18358	0.251065	1.1562	0.28573	1.11042	0.621452
ILMN_1213034	AK008565	2010312A17Rik			-1.11432	0.0987091	-1.07543	0.0586722	-1.0466	0.0647966		-1.16308	0.0939934	-1.14577	0.036691	-1.10291	0.00999404
ILMN_1213036	AK080899	B430202L17Rik			-1.15552	0.0699222	-1.16589	0.120189	-1.17344	0.0936869		-1.02405	0.0576981	-1.20558	0.0628088	-1.06309	0.153955
ILMN_1213039	NM_183319.1	A630026F04			-1.12629	0.0327357	-1.04656	0.0998446	-1.09783	0.0837704		-1.10461	0.0592238	-1.16983	0.0838268	-1.07772	0.0434584
ILMN_1213044	AK043673	A830018L16Rik			1.17646	0.0575821	1.00471	0.0562921	1.0397	0.0436144		-1.05987	0.0390571	-1.10215	0.0727895	-1.04079	0.0969643
ILMN_1213045	AK034651	9430020B03Rik			-1.09565	0.0522063	-1.11715	0.143182	-1.20938	0.102924		1.0472	0.133755	1.02093	0.160815	1.09547	0.22269
ILMN_1213049	AK031198	Odz2			-1.04424	0.0746584	-1.08557	0.109898	-1.26992	0.0189864		-1.04414	0.103866	-1.02738	0.072034	-1.06395	0.176436
ILMN_1213051	XM_358526.1	LOC381208			-1.06037	0.0465224	-1.00199	0.117517	-1.08613	0.102617		-1.07001	0.0334163	-1.12634	0.0820617	1.04825	0.0987734
ILMN_1213052	AK041448	A630010I05Rik			-1.05003	0.0665506	-1.05781	0.120722	-1.14975	0.0579106		-1.02393	0.0652084	-1.17552	0.0635218	-1.01903	0.0999959
ILMN_1213053	NM_027462.4	Wars2	AI413375; 5730427B17Rik; TrpRS; 9430020O07Rik	Mus musculus tryptophanyl tRNA synthetase 2 (mitochondrial) (Wars2), nuclear gene encoding mitochondrial protein, mRNA.	-1.42868	0.16408	-1.25373	0.165954	-1.41238	0.330772		1.00336	0.146023	1.04859	0.160388	1.23817	0.41922
ILMN_1213055	NM_011949.3	Mapk1	C78273; PRKM2; MAPK2; ERK; p42mapk; AU018647; Erk2; AA407128; Prkm1; 9030612K14Rik; p41mapk	Mus musculus mitogen-activated protein kinase 1 (Mapk1), transcript variant 1, mRNA.	-1.04114	0.15104	-1.15633	0.0991124	-1.31207	0.0332485		1.00084	0.0849528	-1.26121	0.0378769	-1.34356	0.16366
ILMN_1213056	NM_183171.1	Fez1	UNC-76; UNC76; MGC19293	Mus musculus fasciculation and elongation protein zeta 1 (zygin I) (Fez1), mRNA.	1.04172	0.144142	-1.01114	0.103044	1.02704	0.103412		1.00413	0.0585795	-1.08145	0.0612108	1.06747	0.161265
ILMN_1213065	AK052779	D630050P10Rik			-1.03618	0.0856524	-1.03367	0.0637951	-1.08208	0.0261539		-1.07842	0.0201682	-1.11258	0.0644762	-1.02657	0.0579209
ILMN_1213066		Ppifs			-1.0282	0.0707105	1.10173	0.0604778	1.02274	0.0658699		1.04562	0.147197	1.04456	0.0386507	1.00666	0.0701262
ILMN_1213068	NM_027218.2	Clec4b1	Clec4b; Aplra2; DCARbeta; 1810046I24Rik; DCAR; mDcar2	Mus musculus C-type lectin domain family 4, member b1 (Clec4b1), mRNA.	1.09864	0.102701	1.28598	0.0936598	-1.07349	0.180159		-1.01471	0.00997025	1.08594	0.0763126	1.10477	0.0703595
ILMN_1213070	NM_026091.2	1700037H04Rik	RP23-32L15.2	Mus musculus RIKEN cDNA 1700037H04 gene (1700037H04Rik), mRNA.	-1.23879	0.116601	1.15222	0.409318	1.15666	0.200798		1.12479	0.104839	1.62681	0.213543	1.20745	0.324546
ILMN_1213072	XM_001001795.2	Wdr89		PREDICTED: Mus musculus WD repeat domain 89, transcript variant 1 (Wdr89), mRNA.	1.09714	0.114644	-1.01234	0.148956	-1.22691	0.163457		-1.01666	0.114131	-1.09717	0.0356071	-1.10604	0.0555512
ILMN_1213074	NM_001039185.1	Ceacam1	mmCGM2; Bgp; CD66a; Bgp1; Cea1; mCEA1; mmCGM1; bb-1; Cea-7; MHVR; mmCGM1a; C-CAM; Hv2; Cea-1; Mhv-1; Hv-2; Cea7	Mus musculus CEA-related cell adhesion molecule 1 (Ceacam1), transcript variant 1, mRNA.	-1.14557	0.129248	-1.78312	0.129995	-1.89179	0.179654		1.01721	0.338633	-2.07905	0.0349826	-1.69897	0.206658
ILMN_1213082	XM_974864.2	Cntn5		PREDICTED: Mus musculus contactin 5 (Cntn5), mRNA.	1.08381	0.145413	1.06851	0.0177942	1.14203	0.0754434		1.03715	0.0314587	1.0945	0.0470611	1.14945	0.0371979
ILMN_1213086	AK035999	9630025O15Rik			1.07658	0.19091	1.0687	0.0606686	1.00444	0.0870922		1.02933	0.050643	1.02427	0.114967	-1.00063	0.0717909
ILMN_1213090	AK008522	2010305C02Rik			1.16855	0.899446	-1.30282	0.193534	-1.41153	0.284736		-1.16659	0.315238	-1.57442	0.0759432	-1.51007	0.0873604
ILMN_1213091	AK042629	A730011P13Rik			-1.01863	0.109695	-1.10022	0.0140305	1.01622	0.00570707		-1.0673	0.110309	-1.1247	0.129018	-1.06785	0.0974694
ILMN_1213093	NM_146832.1	Olfr134	MOR256-5	Mus musculus olfactory receptor 134 (Olfr134), mRNA.	1.06024	0.0445138	-1.00273	0.150177	-1.04492	0.01374		-1.01583	0.0334704	-1.18226	0.14039	-1.16444	0.132946
ILMN_1213096	NM_146936.1	Olfr1417	MOR266-2	Mus musculus olfactory receptor 1417 (Olfr1417), mRNA.	-1.05845	0.0975784	-1.15872	0.120408	-1.0892	0.0852331		-1.08429	0.100275	-1.20603	0.0809159	-1.06656	0.0824398
ILMN_1213099	XM_356719.1	LOC382867			1.00828	0.0504608	-1.03602	0.0782481	-1.01835	0.0898121		-1.12809	0.0359079	-1.18227	0.0642503	-1.00998	0.0371333
ILMN_1213101	NM_010715.1	Lig1	LigI; AL033288; mLigI	Mus musculus ligase I, DNA, ATP-dependent (Lig1), mRNA.	1.11044	0.176934	1.01108	0.077595	1.09414	0.191872		1.02751	0.0625942	1.02997	0.0776958	-1.00717	0.0337775
ILMN_1213103	XM_486812	BC031147			1.17383	0.0614073	1.08343	0.0724893	1.12636	0.112397		1.07534	0.0748591	1.08485	0.148306	-1.01292	0.132428
ILMN_1213106	AK006181	1700020N17Rik			-1.04151	0.0199771	-1.0694	0.0372944	-1.03893	0.0804096		-1.01913	0.0167806	-1.06651	0.0453526	-1.03443	0.074372
ILMN_1213108	XM_355934.1	LOC381917			-1.03017	0.0618656	-1.0445	0.172862	1.00553	0.073897		-1.04619	0.0754489	-1.0406	0.142973	-1.06277	0.0888099
ILMN_1213110	NM_019476.1	Olfr159	Olfr37e; mOR37e; MOR262-5	Mus musculus olfactory receptor 159 (Olfr159), mRNA.	-1.0189	0.0522755	-1.11488	0.0406831	-1.13482	0.148486		-1.03	0.0830554	-1.15121	0.116266	-1.00479	0.230957
ILMN_1213111	XM_150046.1	LOC234050			1.01506	0.121734	1.0268	0.029357	-1.04933	0.292894		-1.04782	0.116001	-1.04436	0.0817163	1.12585	0.100526
ILMN_1213113	AK019511	4831415H04Rik			-1.00973	0.0487826	-1.10403	0.0520688	-1.1096	0.166145		1.10649	0.0993793	1.05191	0.132773	1.04277	0.0201733
ILMN_1213114	XM_136686.3	LOC241084			-1.04949	0.0280407	-1.03807	0.0260901	-1.13215	0.063163		-1.0821	0.025207	-1.06543	0.0748932	-1.13579	0.00956193
ILMN_1213116	AK035350	9530020O07Rik			-1.08337	0.0818267	-1.27064	0.237867	-1.15272	0.0104302		-1.02909	0.112069	1.01889	0.0723405	-1.05665	0.163551
ILMN_1213117	NM_134125.3	Trip10	AI646975; Cip4	Mus musculus thyroid hormone receptor interactor 10 (Trip10), mRNA.	1.04667	0.11012	1.32954	0.0932961	1.32544	0.0927504		-1.26685	0.464866	1.09796	0.331994	1.11858	0.283067
ILMN_1213120	XM_355598.1	LOC381634			1.0856	0.0377421	-1.10656	0.0679424	-1.05392	0.106139		1.11013	0.125996	-1.01043	0.134024	1.10231	0.199169
ILMN_1213121	AK021095	C030018L16Rik			-1.07506	0.0376719	-1.04087	0.0660903	-1.14279	0.0993894		1.04841	0.20779	1.02946	0.127686	1.07083	0.110806
ILMN_1213122	XM_001472622.1	LOC100045688		PREDICTED: Mus musculus similar to coiled-coil-helix-coiled-coil-helix domain containing 2 (LOC100045688), mRNA.	-1.03182	0.0959114	-1.22781	0.117598	-1.1053	0.0374573		-1.2124	0.118511	-1.25576	0.09159	-1.181	0.160972
ILMN_1213123	XM_001475441.1	LOC100046035		PREDICTED: Mus musculus similar to ADAM23 (LOC100046035), mRNA.	1.20454	0.153398	1.58094	0.281975	1.8948	0.326743		1.19354	0.194263	1.53524	0.356657	1.66767	0.127828
ILMN_1213124	NM_029101.3	1110014J01Rik	AA408146	Mus musculus RIKEN cDNA 1110014J01 gene (1110014J01Rik), mRNA.	1.08623	0.067807	1.06202	0.189754	1.06471	0.114023		-1.11183	0.107148	-1.11805	0.133804	1.05145	0.135709
ILMN_1213128	XM_355852.1	LOC381839			1.01781	0.0816004	1.04425	0.142492	1.03343	0.0815135		-1.02969	0.153898	-1.11266	0.188819	-1.1027	0.0238866
ILMN_1213134	XM_980494.1	Ttc18		PREDICTED: Mus musculus tetratricopeptide repeat domain 18 (Ttc18), mRNA.	-1.05186	0.0369753	-1.00143	0.161275	-1.07997	0.0971201		1.10221	0.131161	-1.03028	0.0959992	1.00694	0.0088374
ILMN_1213135	AK037700	A130038M19Rik			-1.01941	0.0930503	1.03586	0.0234301	-1.01942	0.0563127		-1.19001	0.152815	-1.18284	0.182677	-1.00587	0.0895474
ILMN_1213136	NM_138606.1	Pim2	Pim-2; DXCch3	Mus musculus proviral integration site 2 (Pim2), transcript variant 1, mRNA.	1.12979	0.1212	1.02087	0.0386463	1.20722	0.158264		-1.14115	0.101017	-1.03024	0.0930309	-1.03306	0.11579
ILMN_1213138	NM_025371.2	Acy1	Acy-1; 1110014J22Rik	Mus musculus aminoacylase 1 (Acy1), mRNA.	-1.34557	0.160258	-2.94621	0.0562914	-2.05312	0.0638799		-1.56488	0.227944	-2.44159	0.0937259	-2.33706	0.0519305
ILMN_1213139	NM_013905.3	Heyl	hesr3; Hrt3; Hey3	Mus musculus hairy/enhancer-of-split related with YRPW motif-like (Heyl), mRNA.	1.04189	0.0793622	1.20509	0.192387	1.24465	0.0985196		-1.0874	0.156153	1.10596	0.0596796	1.13627	0.361688
ILMN_1213141	AK015758	4930511J15Rik			1.1305	0.0568761	-1.03648	0.192167	-1.16453	0.169377		1.07454	0.135722	-1.25925	0.158588	-1.02827	0.192072
ILMN_1213144	NM_021714.3	Wbp11	D6Wsu113e; 2510026P17Rik; SIPP1; Npwbp	Mus musculus WW domain binding protein 11 (Wbp11), mRNA.	1.01265	0.153282	1.16131	0.128257	1.21846	0.177984		1.17536	0.0691299	1.37109	0.119514	1.2813	0.19345
ILMN_1213145	NM_009576	Zic4			-1.06469	0.0718725	-1.06754	0.0745151	-1.11393	0.11821		1.00007	0.0800269	1.00167	0.11877	-1.00532	0.0906183
ILMN_1213147	XM_358992.1	LOC385904			1.01763	0.0629409	1.0085	0.0835446	1.08249	0.160991		-1.07929	0.103251	-1.0696	0.0721261	-1.06768	0.0590058
ILMN_1213148	NM_019488.4	Slc2a8	D2Ertd44e; GlutX1; GLUT8	Mus musculus solute carrier family 2, (facilitated glucose transporter), member 8 (Slc2a8), mRNA.	-1.08246	0.0431672	-1.15744	0.1402	1.01441	0.151444		-1.11101	0.153503	-1.29933	0.131204	-1.0197	0.27227
ILMN_1213149		1110029L17Rik			-1.09892	0.0830834	1.40508	0.101948	1.4942	0.203995		-1.10727	0.397909	1.19911	0.207873	1.1496	0.196036
ILMN_1213156	AK040306	Ly9			1.18127	0.11753	1.33085	0.145274	1.0948	0.11688		1.07425	0.166573	1.34126	0.150982	1.15485	0.109714
ILMN_1213160	NM_001033223.2	Lin7a	AI848705; MGC102231; LIN-7A; Veli; Veli1; TIP-33; MALS-1	Mus musculus lin-7 homolog A (C. elegans) (Lin7a), transcript variant 2, mRNA.	-1.22192	0.118849	-1.37442	0.121222	-1.54409	0.106888		-1.15696	0.165505	-1.30624	0.208128	-1.37129	0.0362943
ILMN_1213161	AK014438	3830414F09Rik			-1.02239	0.0561669	1.03998	0.132583	1.05814	0.0432826		1.15162	0.165678	1.06817	0.144869	1.00379	0.0758692
ILMN_1213162	AK033371	8430408J21Rik			-1.03772	0.0485779	-1.04394	0.0950118	-1.04393	0.0813559		-1.00588	0.069894	-1.13184	0.0363375	1.00906	0.118255
ILMN_1213167	NM_013507.2	Eif4g2			1.06633	0.142044	1.0995	0.16411	-1.29149	0.285567		-1.11622	0.106538	-1.05573	0.0378469	-1.30487	0.275036
ILMN_1213174	XR_035388.1	A330017A19Rik		PREDICTED: Mus musculus RIKEN cDNA A330017A19 gene (A330017A19Rik), misc RNA.	-1.12279	0.113759	-1.31676	0.0640311	-1.14812	0.056003		-1.17627	0.126587	-1.36931	0.164004	-1.32204	0.245102
ILMN_1213185	XM_358947.1	LOC385792			-1.01127	0.0578293	-1.05694	0.0653677	-1.04912	0.110474		-1.13661	0.0996506	-1.11456	0.10368	-1.13941	0.018614
ILMN_1213186		4432404P07Rik			1.02184	0.142997	1.01143	0.25408	1.30991	0.288056		1.11972	0.181182	1.29441	0.279045	1.14779	0.154759
ILMN_1213191	NM_144818	Brrn1			1.27894	0.206355	2.4537	0.604902	2.25002	0.337254		1.19604	0.958568	2.663	0.249525	1.69305	0.47868
ILMN_1213197	XM_914197.2	EG434181		PREDICTED: Mus musculus predicted gene, EG434181 (EG434181), mRNA.	-1.02961	0.0671216	1.09793	0.134572	1.04666	0.143897		1.035	0.0305274	1.0057	0.0553428	1.01231	0.119746
ILMN_1213200	NM_198107.1	Med16	Thrap5; 95kDa; A630083L04; Trap95	Mus musculus mediator complex subunit 16 (Med16), mRNA.	1.00757	0.0732006	1.16274	0.0858583	1.44273	0.172113		-1.03174	0.16232	1.07723	0.0770965	1.1832	0.52005
ILMN_1213202	NM_181072	Myo1e			-1.07064	0.139491	-1.08288	0.0966127	-1.12802	0.20445		1.05252	0.0537632	-1.16075	0.0628276	-1.07981	0.114321
ILMN_1213205	XM_286081.2	LOC330686			1.00892	0.0793286	-1.05696	0.113552	-1.15209	0.130758		-1.10492	0.0647919	-1.08558	0.0162574	-1.18208	0.167839
ILMN_1213209	XM_136255.4	EG226472		PREDICTED: Mus musculus predicted gene, EG226472 (EG226472), mRNA.	-1.09638	0.0278794	-1.02823	0.0464806	-1.09623	0.0452775		-1.07908	0.0552679	-1.06902	0.108791	-1.02701	0.0675842
ILMN_1213212	XM_913238.3	EG620835		PREDICTED: Mus musculus predicted gene, EG620835 (EG620835), mRNA.	-1.0438	0.0257616	1.0728	0.118629	1.17291	0.0773746		1.02524	0.123486	-1.0548	0.134149	-1.08141	0.258418
ILMN_1213214	AK014414	3830403L08Rik			-1.17635	0.0644849	-1.12924	0.0874139	-1.04971	0.085373		-1.12976	0.0667252	-1.2726	0.0438037	-1.15478	0.174439
ILMN_1213216	NM_010143.1	Ephb3	Cek10; AW456895; Etk2; HEK2; Tyro6; MDK5; Sek4	Mus musculus Eph receptor B3 (Ephb3), mRNA.	-1.1212	0.0578276	-1.0301	0.0744313	-1.07941	0.169836		-1.12289	0.0683356	-1.15615	0.156868	-1.00065	0.0450795
ILMN_1213220	XM_357180.1	LOC383675			1.04909	0.0211036	-1.07273	0.0344494	1.02212	0.0357171		1.18655	0.176492	1.03368	0.0950797	1.00415	0.185376
ILMN_1213222	NM_134228.1	V1rl1	V1rd2	Mus musculus vomeronasal 1 receptor, L1 (V1rl1), mRNA.	-1.04299	0.0670605	-1.15121	0.0456765	-1.00846	0.244936		-1.04059	0.0887017	-1.18754	0.0808948	-1.15835	0.0364532
ILMN_1213227	XM_354889.1	Krt2-19			1.01818	0.0178156	1.09432	0.123246	-1.01173	0.0920123		-1.20034	0.239612	-1.27782	0.291564	-1.15487	0.153964
ILMN_1213231	NM_028312.2	Ccdc12	2700094L05Rik; C76605	Mus musculus coiled-coil domain containing 12 (Ccdc12), mRNA.	1.21266	0.174689	1.43982	0.38903	1.4189	0.261142		-1.0874	0.367583	-1.29331	0.459751	-1.29302	0.712532
ILMN_1213236	XM_155821.3	LOC239683			-1.082	0.0647102	-1.05853	0.0529101	-1.10797	0.0523045		-1.06016	0.0224939	-1.01549	0.230722	-1.08306	0.185001
ILMN_1213239	XM_001000454.2	LOC627626		PREDICTED: Mus musculus similar to CG11212-PA (LOC627626), mRNA.	-1.05393	0.0672021	-1.12892	0.0184958	-1.14031	0.0319586		1.0865	0.153187	1.00601	0.10897	1.01907	0.140186
ILMN_1213244	NM_029832.2	2600009E05Rik	RP23-100C5.9; AI326138; 1110001I20Rik	Mus musculus RIKEN cDNA 2600009E05 gene (2600009E05Rik), mRNA. XM_925578 XM_925581 XM_925583 XM_994018 XM_994040 XM_994059 XM_994077	-1.36743	0.0780599	-1.83482	0.0895319	-1.52042	0.123935		-1.32064	0.188343	-2.03047	0.0403502	-1.84644	0.148684
ILMN_1213245		scl000022.1_12_REVCOMP			-1.04086	0.0892025	-1.10984	0.0302811	-1.00769	0.04543		-1.08504	0.0399833	1.0046	0.0891572	1.02672	0.0371009
ILMN_1213249	AK083689	D030067F24Rik			-1.04545	0.0358372	-1.11494	0.0692401	-1.10709	0.0192501		-1.15482	0.0549562	-1.32875	0.111216	-1.11392	0.0280762
ILMN_1213257	NM_178193.1	Hist1h4b		Mus musculus histone cluster 1, H4b (Hist1h4b), mRNA.	-1.1405	0.125803	1.00607	0.13325	1.21296	0.452211		1.07594	0.16531	-1.00941	0.0368116	1.23725	0.280875
ILMN_1213259	XM_355865.1	LOC381853			-1.04191	0.172137	-1.12196	0.0820483	-1.07657	0.0588253		1.03996	0.0762748	-1.01314	0.0834605	1.00725	0.0396097
ILMN_1213261	XM_355890.1	2210412E05Rik			-1.07106	0.0365992	-1.17183	0.148705	-1.07189	0.140145		-1.04025	0.0592216	1.02262	0.136156	1.06097	0.0764864
ILMN_1213262	XR_004454.1	LOC217390		PREDICTED: Mus musculus similar to heat shock protein 1 (chaperonin) (LOC217390), mRNA.	1.10102	0.0311478	-1.0826	0.106429	-1.1435	0.00413816		-1.03915	0.119553	1.02099	0.0549716	-1.1063	0.104349
ILMN_1213265	NM_181732.3	2610208M17Rik	MGC6869; MGC101949; BC004835	Mus musculus RIKEN cDNA 2610208M17 gene (2610208M17Rik), mRNA.	-1.04351	0.0619763	1.01669	0.058951	-1.08709	0.196345		1.07806	0.0329355	-1.03428	0.0515971	1.11516	0.162016
ILMN_1213268	NM_010407.3	Hck	Hck-1; AI849071; Bmk; MGC18625	Mus musculus hemopoietic cell kinase (Hck), mRNA.	1.01545	0.137336	1.12208	0.0217465	1.01211	0.0748723		1.01637	0.0908043	1.09596	0.0909205	1.06994	0.108642
ILMN_1213270	XM_144994.3	LOC210633			-1.06667	0.0999693	1.07525	0.16791	-1.08556	0.073259		-1.10875	0.0654539	-1.14118	0.0690225	-1.02068	0.051771
ILMN_1213272	NM_145147	Pgbpll			1.01407	0.18074	1.02182	0.139606	1.24672	0.122723		-1.05848	0.121567	1.19058	0.200935	1.06837	0.154767
ILMN_1213273	NM_177152.4	Lrig3	9030421L11Rik; 9430095K15Rik; 9130004I02Rik; mKIAA3016	Mus musculus leucine-rich repeats and immunoglobulin-like domains 3 (Lrig3), mRNA.	-1.20344	0.119881	-1.2926	0.0864485	-1.29436	0.279887		-1.17479	0.146615	-1.33262	0.11637	-1.11461	0.230102
ILMN_1213274	NM_026940.3	Ydjc	4930521M19Rik; MGC144470	Mus musculus YdjC homolog (bacterial) (Ydjc), mRNA.	1.06287	0.0653307	1.42986	0.187792	1.49474	0.353423		-1.10585	0.592821	1.3498	0.429942	1.29267	0.240907
ILMN_1213275	NM_133649.1	Slc12a6	KCC3	Mus musculus solute carrier family 12, member 6 (Slc12a6), transcript variant 2, mRNA.	1.12558	0.134886	1.01526	0.0519761	-1.01368	0.0900093		-1.08818	0.0424174	-1.01439	0.129084	1.07738	0.0389663
ILMN_1213278	NM_146145.2	Jak1	AA960307; MGC37919; C130039L05Rik	Mus musculus Janus kinase 1 (Jak1), mRNA.	1.44537	0.312481	1.71993	0.417532	1.23495	0.0429639		1.26635	0.210684	1.1897	0.185927	1.10914	0.17745
ILMN_1213279	AK089551	F830001A22Rik			-1.08267	0.110533	-1.16424	0.0396152	-1.10135	0.179631		-1.12316	0.0776771	-1.18306	0.0689321	1.03147	0.113849
ILMN_1213286	NM_011124.4	Ccl21b	Scya21b; 6CKBAC2; plt; AW987545; 6Ckine; SLC; MGC107632; ALP; CKb9; Tca4; Scya21	Mus musculus chemokine (C-C motif) ligand 21b (Ccl21b), mRNA.	-1.47065	0.0246046	2.08628	0.739731	3.46696	0.782788		1.34157	0.653823	1.60528	0.642846	2.28828	0.850659
ILMN_1213287	NM_175419.4	Actr5	AA545173; B430109J19Rik	Mus musculus ARP5 actin-related protein 5 homolog (yeast) (Actr5), mRNA.	-1.10616	0.130536	-1.00959	0.102613	1.01996	0.0767357		-1.14899	0.16067	-1.1914	0.137006	-1.18022	0.275774
ILMN_1213289	NM_144786.1	Ggt7	6330563L03Rik; 1110017C11Rik; MGC12004	Mus musculus gamma-glutamyltransferase 7 (Ggt7), mRNA.	-1.059	0.0797473	1.06367	0.0526924	1.18839	0.211095		1.1084	0.0583862	1.23489	0.169775	1.16154	0.11604
ILMN_1213290	NM_001077696.1	Hdac5	mKIAA0600; mHDA1; AI426555; Hdac4	Mus musculus histone deacetylase 5 (Hdac5), transcript variant 1, mRNA.	1.16513	0.202327	1.125	0.261211	1.15836	0.130532		-1.09441	0.105169	-1.28549	0.171233	-1.36164	0.491783
ILMN_1213295	XM_110439.5	Adh6b		PREDICTED: Mus musculus alcohol dehydrogenase 6B (class V) (Adh6b), mRNA.	-1.04487	0.0842067	1.13573	0.398381	1.07863	0.063617		1.03659	0.142969	1.45902	0.0808398	1.20369	0.124692
ILMN_1213296	NM_001039578.2	Evi5l	1700084G18Rik; MGC29047; 2310039H16Rik; EVI5L; 3110007G05Rik	Mus musculus ecotropic viral integration site 5 like (Evi5l), mRNA.	1.03076	0.0587902	1.2022	0.0471232	1.27331	0.0287406		1.09632	0.0815125	1.18244	0.0893507	1.07215	0.428383
ILMN_1213297	AK045917	B230323D24Rik			1.07583	0.121433	-1.04612	0.122184	-1.00141	0.0884849		-1.04436	0.101929	1.01747	0.195738	-1.00855	0.0841791
ILMN_1213304	NM_009604	Chrng			-1.03441	0.0421393	-1.0814	0.15239	-1.0157	0.0630246		1.05221	0.108096	1.06528	0.065474	-1.02717	0.0133019
ILMN_1213305	XM_355400.1	Nbea			-1.00238	0.0206253	1.05651	0.0263628	1.02323	0.122143		-1.00086	0.0487492	1.02941	0.0626229	1.05681	0.127203
ILMN_1213306	NM_177184.3	Vps13c	W51662; AV026040; AI552542; C230055H22Rik; chorein	Mus musculus vacuolar protein sorting 13C (yeast) (Vps13c), mRNA.	-1.08331	0.0618967	1.18415	0.107299	1.06923	0.0878835		1.07994	0.132007	1.12943	0.12619	1.05316	0.100428
ILMN_1213307	NM_153088.1	Ctdsp1	NLIIF; SCP1; Nif3; GIP	Mus musculus CTD (carboxy-terminal domain, RNA polymerase II, polypeptide A) small phosphatase 1 (Ctdsp1), mRNA.	-1.17622	0.105376	-1.48118	0.12368	-1.1871	0.0514035		-1.16749	0.160919	-1.48346	0.0946789	-1.33222	0.19933
ILMN_1213309	NM_153388.3	Lrfn4	SALM3; MGC36545; MGC36464; BC023156	Mus musculus leucine rich repeat and fibronectin type III domain containing 4 (Lrfn4), mRNA.	1.11435	0.10856	-1.07442	0.0446263	-1.17164	0.126833		1.03052	0.0983143	-1.1675	0.0307963	-1.0966	0.0900941
ILMN_1213311	XM_001474380.1	LOC100045484		PREDICTED: Mus musculus similar to GFRalpha-3 (LOC100045484), mRNA.	-1.18591	0.08017	-1.12836	0.0489622	-1.11053	0.127577		-1.06906	0.0496478	-1.05254	0.0464691	1.02455	0.0666536
ILMN_1213312	NM_029322.1	1700024B05Rik			-1.16084	0.0832621	-1.02337	0.0446093	-1.11483	0.0547917		1.00234	0.0542794	-1.02717	0.0383093	-1.03524	0.0963573
ILMN_1213316	NM_023626.4	Ing3	1300013A07Rik; P47ING3	Mus musculus inhibitor of growth family, member 3 (Ing3), mRNA.	1.02767	0.151987	1.03878	0.306327	-1.09567	0.0830409		1.03238	0.146988	-1.06215	0.136834	1.0031	0.137232
ILMN_1213317	NM_028832.2	Mterfd3	1700007D05Rik	Mus musculus MTERF domain containing 3 (Mterfd3), mRNA.	-1.05361	0.239485	1.04675	0.0232614	1.03296	0.105587		1.06263	0.105043	1.01499	0.0835076	-1.04607	0.0352514
ILMN_1213321	NM_134253.1	Bnipl	BNIPL-2; BNIP-S; PP73; BNIPL-1; BNIPL1; BNIPL2; 1700128A13Rik; PP753; MGC8103	Mus musculus BCL2/adenovirus E1B 19kD interacting protein like (Bnipl), mRNA.	1.0866	0.0839373	-1.05663	0.0438227	-1.02518	0.130199		-1.0895	0.05524	-1.1289	0.093491	1.07276	0.0977951
ILMN_1213322	NM_001081345.1	Chd2	BC029703; 2810013C04Rik; AI851092; 2810040A01Rik; 5630401D06Rik	Mus musculus chromodomain helicase DNA binding protein 2 (Chd2), mRNA.	-1.10785	0.1508	-1.31614	0.107731	-1.30564	0.151204		-1.14261	0.108523	-1.23957	0.0370129	-1.10928	0.252058
ILMN_1213323	XM_357200.1	LOC383711			-1.05901	0.025051	-1.06492	0.071181	-1.02514	0.0728809		-1.16828	0.064487	-1.15023	0.0565092	-1.06308	0.0519321
ILMN_1213324	XM_904244.3	BC049349		PREDICTED: Mus musculus cDNA sequence BC049349, transcript variant 1 (BC049349), mRNA.	1.10764	0.0935074	-1.0615	0.0856907	-1.08198	0.0908624		1.11381	0.248658	1.02575	0.149342	-1.08574	0.106997
ILMN_1213331	NM_001081378.1	C330002I19Rik	Kidins220; mKIAA1250; 3110039L19Rik; AI316525; AI194387	Mus musculus RIKEN cDNA C330002I19 gene (C330002I19Rik), mRNA.	1.04125	0.0716989	1.04368	0.0182442	-1.04242	0.0706104		1.05629	0.0554344	1.08908	0.0569	1.11246	0.278671
ILMN_1213332	XM_138309.2	LOC380805			1.0199	0.183271	2.52974	9.95229	12.1639	10.1733		-1.10285	0.861995	16.0992	10.207	14.4319	20.4796
ILMN_1213333	AK016617	4933402G07Rik			-1.01538	0.0795073	1.01095	0.0604003	-1.00085	0.108305		-1.02454	0.0707364	-1.02531	0.123393	-1.10915	0.127617
ILMN_1213334	NM_025915.3	Tmem88	2600017H02Rik; RP23-5O23.4	Mus musculus transmembrane protein 88 (Tmem88), mRNA.	-1.05094	0.0319296	-1.08814	0.108805	-1.02679	0.0422168		-1.01348	0.178041	1.07787	0.0721388	-1.00378	0.0566584
ILMN_1213337	NM_028325.2	Zcchc12	AV136720; 2810028A01Rik	Mus musculus zinc finger, CCHC domain containing 12 (Zcchc12), mRNA.	-1.05302	0.0628684	-1.07019	0.121232	1.02916	0.197967		1.10959	0.0977156	1.00295	0.053187	1.18025	0.167496
ILMN_1213339	XM_142108.2	LOC245580			1.04505	0.09022	-1.03177	0.0345917	1.01455	0.116143		1.10196	0.147443	-1.07406	0.0380417	-1.05206	0.0733388
ILMN_1213342	XM_205167.3	LOC278061			1.03829	0.0892168	1.10148	0.0848394	1.0915	0.0606069		1.10154	0.0780714	1.04072	0.0208374	-1.11129	0.195148
ILMN_1213343	XM_355411.1	LOC381458			-1.06805	0.078756	-1.10177	0.114612	-1.01034	0.0368702		-1.00691	0.107074	-1.09954	0.110661	-1.06344	0.0770628
ILMN_1213345	XM_154842.2	LOC239151			1.11245	0.0596406	-1.12482	0.0696289	-1.02551	0.14294		-1.07662	0.0323702	-1.19026	0.0992727	-1.18505	0.0153632
ILMN_1213349	XM_285173.2	LOC332175			-1.05766	0.0557541	1.01672	0.180498	-1.11652	0.0215966		-1.24842	0.143031	-1.2013	0.223393	-1.22434	0.128322
ILMN_1213351	NM_021347.3	Gsdma1	Gsdma1; Gsdm; BB149167; H312E	Mus musculus gasdermin A1 (Gsdma1), mRNA.	-1.08474	0.0327021	-1.1346	0.111267	-1.16185	0.147286		1.03631	0.0719782	-1.20009	0.0748734	-1.02789	0.074256
ILMN_1213354	NM_172421.3	Asxl2	4930556B16Rik; mKIAA1685	Mus musculus additional sex combs like 2 (Drosophila) (Asxl2), mRNA.	1.21537	0.137432	1.00266	0.0274819	1.11361	0.188599		-1.03125	0.030808	1.03296	0.145984	-1.01147	0.0651108
ILMN_1213355	NM_134185.1	V1rc30		Mus musculus vomeronasal 1 receptor, C30 (V1rc30), mRNA.	1.03118	0.0949976	-1.07901	0.0619484	-1.05853	0.109835		1.08686	0.100927	-1.07497	0.0312113	-1.0385	0.116162
ILMN_1213359	AK044752	Mapk6			-1.02699	0.11033	-1.13522	0.0740359	-1.10882	0.0158146		-1.17222	0.0310496	-1.0429	0.0379125	-1.21166	0.142115
ILMN_1213360	AK032448	6430548O12Rik			-1.15025	0.0796562	-1.1252	0.104293	-1.02904	0.0986577		-1.02818	0.0551636	1.04559	0.0563022	-1.09951	0.125441
ILMN_1213361	XM_356927.1	LOC383215			-1.87746	0.171977	-4.35765	0.0476631	-4.45781	0.0284182		-1.49171	0.272174	-5.42679	0.0185698	-3.98015	0.0309002
ILMN_1213362	XM_983525.1	EG666387		PREDICTED: Mus musculus predicted gene, EG666387 (EG666387), mRNA.	-1.08541	0.0797264	-1.05204	0.0222409	1.01538	0.0510237		1.0115	0.116729	1.06549	0.140083	1.07187	0.00911638
ILMN_1213364	XM_915073.1	LOC638892		PREDICTED: Mus musculus similar to cpn10 protein (LOC638892), mRNA.	-1.11317	0.533294	-1.6739	0.189225	-1.43445	0.405512		-1.30056	0.211331	-1.69341	0.130838	-1.69438	0.192545
ILMN_1213365	AK044668	Naglu			-1.07269	0.159578	-1.10085	0.0717996	-1.08964	0.0793194		-1.14888	0.0169593	-1.08274	0.0566967	-1.11258	0.0754086
ILMN_1213368	NM_146602.2	Olfr698	MOR283-3	Mus musculus olfactory receptor 698 (Olfr698), mRNA.	-1.03229	0.12961	-1.01428	0.159107	-1.08261	0.119587		-1.05579	0.0578489	-1.19193	0.0663611	-1.02649	0.0922224
ILMN_1213371	NM_010338.1	Gpr37	Pael-R; AI848630	Mus musculus G protein-coupled receptor 37 (Gpr37), mRNA.	-1.03928	0.101045	-1.10792	0.108408	-1.08125	0.120375		1.06755	0.137281	-1.25544	0.0562957	-1.04032	0.206608
ILMN_1213372	NM_177908.2	D230040E23			-1.00658	0.0709386	-1.02886	0.0582218	1.07685	0.125205		-1.04371	0.0661708	-1.03657	0.0374993	-1.08422	0.15944
ILMN_1213373	XM_111432.2	LOC193438			-1.10855	0.139386	-1.15495	0.0506782	-1.07585	0.0969384		-1.05934	0.0817783	-1.063	0.11243	-1.04859	0.0394968
ILMN_1213374	AK052366	D330040L23Rik			-1.08	0.114657	-1.05301	0.118796	-1.10127	0.0580478		-1.00626	0.0936798	-1.17633	0.07008	-1.07781	0.0492688
ILMN_1213376	NM_007687.2	Cfl1	Cof; AA959946	Mus musculus cofilin 1, non-muscle (Cfl1), mRNA.	1.13926	0.178309	1.783	0.204495	2.01361	0.256366		1.20049	0.613105	1.53657	0.512825	1.39039	0.743975
ILMN_1213378	NM_028894.1	Lonrf3	Rnf127; 4932412G04Rik; A830039N02Rik; 5730439E01Rik; AU023707	Mus musculus LON peptidase N-terminal domain and ring finger 3 (Lonrf3), mRNA.	1.19536	0.145736	1.51979	0.132093	1.24738	0.660033		-1.05401	0.421637	1.14723	0.397792	-1.00843	0.173479
ILMN_1213382	AK050028	Skz1-pending			-1.3546	0.191131	-1.22103	0.0716593	-1.70524	0.147715		-1.0522	0.0487004	-1.13789	0.0952611	-1.19929	0.298331
ILMN_1213393	NM_199221.2	Cd300lb	LMIR5; Clm7; Gm253	Mus musculus CD300 antigen like family member B (Cd300lb), mRNA.	1.08531	0.154147	1.26325	0.33704	1.32096	0.0294672		1.30904	0.340339	1.75158	0.449403	1.35086	0.124185
ILMN_1213400	XM_001476613.1	LOC100041343		PREDICTED: Mus musculus similar to pORF2 (LOC100041343), mRNA.	-1.04046	0.0241318	-1.06799	0.188569	-1.0434	0.0994244		-1.03902	0.152136	1.00187	0.120213	-1.01489	0.0822431
ILMN_1213404	NM_010057.1	Dlx6		Mus musculus distal-less homeobox 6 (Dlx6), mRNA.	-1.14807	0.026834	-1.20813	0.098941	-1.13307	0.201948		1.06036	0.0471144	1.00802	0.108715	1.15833	0.148659
ILMN_1213405	NM_028127	4930488L10Rik			1.05152	0.028176	-1.03436	0.0329154	1.00305	0.106186		-1.12349	0.107036	-1.17821	0.120009	-1.18299	0.0444597
ILMN_1213408	AK053659	E130119H03Rik			-1.10703	0.163029	-1.10001	0.149229	-1.21333	0.0502011		-1.10417	0.0659758	-1.18515	0.147749	-1.21827	0.07835
ILMN_1213409	NM_207027.1	Tas2r125	MGC130081; MGC130082; mt2r59; T2R26; Tas2r25; mGR25	Mus musculus taste receptor, type 2, member 125 (Tas2r125), mRNA.	-1.09722	0.0611129	1.07925	0.109426	-1.06213	0.173818		1.00564	0.0863721	1.01165	0.0346146	1.06625	0.0618728
ILMN_1213414	XM_908538.2	LOC383770		PREDICTED: Mus musculus similar to ribosomal protein (LOC383770), mRNA.	-1.05397	0.180365	1.06226	0.0816716	-1.0303	0.186781		-1.04952	0.131641	-1.16633	0.197926	-1.05618	0.125004
ILMN_1213417	XM_129247.4	4632427C23Rik			1.05634	0.0883569	1.01508	0.045166	1.06919	0.117541		1.01725	0.0156869	-1.05641	0.0977781	1.00971	0.163415
ILMN_1213422	AK033889	Mmd			-1.13919	0.031603	-1.10141	0.167273	-1.23866	0.0175125		-1.02641	0.0746826	-1.21764	0.0455422	-1.24523	0.0529308
ILMN_1213426	NM_170755.2	BC038286	MGC47289	Mus musculus cDNA sequence BC038286 (BC038286), mRNA.	-1.40125	0.244178	-2.29417	0.156966	-1.48449	0.230625		-1.44674	0.153158	-1.76863	0.0548467	-1.40552	0.162088
ILMN_1213431	XM_988307.1	LOC626583		PREDICTED: Mus musculus similar to Ig kappa chain V-III region PC 7132 (LOC626583), mRNA.	-1.05222	0.0949637	4.5876	40.4729	15.9275	21.6294		1.01812	2.11359	37.6412	17.6766	23.3662	8.26034
ILMN_1213433	AK047451	4933406L09Rik			1.01264	0.0832695	-1.01408	0.151104	1.03381	0.0981827		1.08611	0.170549	1.17169	0.159123	1.13707	0.0693146
ILMN_1213437	NM_029949.3	Snapc3	1810020H02Rik; E030018J20Rik; 5031401C21Rik; AI414457; 4930558A07Rik	Mus musculus small nuclear RNA activating complex, polypeptide 3 (Snapc3), mRNA.	-1.04196	0.0650639	1.01819	0.0167077	1.13854	0.16041		1.10183	0.106927	-1.06268	0.100942	-1.03257	0.119778
ILMN_1213439	NM_007496.2	Zfhx3	mKIAA4228; KIAA4228; A230102L03Rik; WBP9	Mus musculus zinc finger homeobox 3 (Zfhx3), mRNA.	-1.11874	0.0689817	-1.07905	0.0297378	-1.2558	0.0940243		-1.23012	0.0969926	-1.15141	0.0637866	-1.13803	0.0898938
ILMN_1213441	NM_207029.1	Tas2r129	mt2r60; mGR29; Tas2r29; T2R29	Mus musculus taste receptor, type 2, member 129 (Tas2r129), mRNA.	1.11105	0.068619	-1.0894	0.033745	-1.04265	0.202348		1.02227	0.0421412	-1.06142	0.0395337	-1.02312	0.0710988
ILMN_1213443	XR_034247.1	LOC433261		PREDICTED: Mus musculus similar to Sid393p (LOC433261), misc RNA.	1.15134	0.62767	1.05324	0.365585	1.20932	0.954821		-1.22504	0.379956	1.01085	0.403657	-1.01237	0.537193
ILMN_1213445	AK051442	D130049D01Rik			1.06715	0.193635	-1.12411	0.132686	-1.24227	0.102653		-1.36609	0.117765	-1.51978	0.15011	-1.33866	0.0368763
ILMN_1213448	XM_976371.1	LOC669658		PREDICTED: Mus musculus similar to melanoma antigen (LOC669658), mRNA.	1.02323	0.170745	1.36016	0.402574	1.46188	0.470767		-1.37449	0.427728	-1.2849	0.377019	-1.27557	0.597078
ILMN_1213449	NM_028636.2	Man2c1	1110025H24Rik	Mus musculus mannosidase, alpha, class 2C, member 1 (Man2c1), mRNA.	-1.0137	0.069641	1.05973	0.0606414	1.19008	0.0590536		1.05386	0.0579671	1.07151	0.0192413	1.07784	0.251485
ILMN_1213454	NM_153116.1	Gtpbp10	BC034507; MGC30495	Mus musculus GTP-binding protein 10 (putative) (Gtpbp10), mRNA.	-1.10885	0.10899	-1.35897	0.0721436	-1.69298	0.0842494		1.12016	0.350574	-1.2933	0.122503	-1.30404	0.290566
ILMN_1213455	AK044883	Rbm14			-1.02196	0.126508	1.01951	0.212074	1.15097	0.0786871		1.13747	0.0824841	1.16088	0.00971164	-1.00572	0.0166233
ILMN_1213456	NM_025522.3	Dhrs7	retDSR4; 5730564L20Rik; AW061210; retSDR4; 2310016E22Rik	Mus musculus dehydrogenase/reductase (SDR family) member 7 (Dhrs7), mRNA.	-1.11192	0.211387	-1.81789	0.0673395	-1.56854	0.0806384		-1.0816	0.329762	-2.09094	0.0444304	-2.01426	0.188564
ILMN_1213457	NM_029721.1	Snx27	5730552M22Rik; ESTM45; R75405; mKIAA0488	Mus musculus sorting nexin family member 27 (Snx27), transcript variant 2, mRNA.	-1.13661	0.133347	-1.16504	0.029427	-1.04398	0.0306402		-1.08113	0.143244	-1.14397	0.0130154	-1.06877	0.112339
ILMN_1213458	NM_015792.1	Fbxo18	AU015756; Fbx18	Mus musculus F-box protein 18 (Fbxo18), mRNA.	-1.08486	0.23975	-1.14998	0.0409256	-1.06954	0.118512		-1.01329	0.14983	-1.07261	0.0928754	1.00881	0.0412322
ILMN_1213461	AK044508	GPR37, ETBR-LP-1, GPCR			-1.04179	0.0936505	-1.05713	0.117609	-1.10909	0.141704		1.1352	0.158137	1.03947	0.029534	1.01375	0.0629904
ILMN_1213470	NM_001081252.1	Ugcgl2	AW047562; 3110027P15Rik; 1810064L21Rik; 3110001A05Rik; A230065J02Rik	Mus musculus UDP-glucose ceramide glucosyltransferase-like 2 (Ugcgl2), mRNA.	1.00704	0.0501978	1.09346	0.0363495	1.08227	0.26186		1.12807	0.111669	1.13429	0.0652979	1.26297	0.320454
ILMN_1213471	XM_282972.2	LOC327983			1.03978	0.0468429	-1.07532	0.0805066	-1.01408	0.130997		-1.01044	0.119261	1.00787	0.0233431	-1.03852	0.13297
ILMN_1213473	NM_013548.2	Hist1h3f	Hist1; H3.2-221	Mus musculus histone cluster 1, H3f (Hist1h3f), mRNA.	1.14779	0.0814532	1.09953	0.229572	1.01935	0.121763		-1.02459	0.0589075	-1.08659	0.101683	-1.00822	0.0999123
ILMN_1213474	NM_007709.3	Cited1	AI316840; Msg1; AU019144	Mus musculus Cbp/p300-interacting transactivator with Glu/Asp-rich carboxy-terminal domain 1 (Cited1), mRNA.	-1.05436	0.0549093	-1.07398	0.0220854	-1.06798	0.13618		1.03029	0.0734926	1.00797	0.074086	1.03591	0.109202
ILMN_1213477	NM_001024806.2	Cebpz	AI848081; Cebpa-rs1; CBF2; Cbf; MGC36087	Mus musculus CCAAT/enhancer binding protein zeta (Cebpz), mRNA.	-1.04039	0.0880836	1.01979	0.116526	-1.0489	0.0927177		1.06448	0.0791954	-1.03513	0.0646352	1.06524	0.0661658
ILMN_1213479	XM_977315.1	EG631797		PREDICTED: Mus musculus predicted gene, EG631797 (EG631797), mRNA.	-1.10146	0.161436	1.03796	0.140048	-1.00271	0.0763516		-1.02074	0.100441	-1.14469	0.0519394	-1.1198	0.0303959
ILMN_1213483	NM_146018.1	Flcn	B430214A04Rik; MGC37841; FLCL; Bhd; AU014660	Mus musculus folliculin (Flcn), mRNA.	-1.37319	0.122096	-1.67581	0.130878	-1.51571	0.234715		1.23753	0.466656	-1.10598	0.259582	-1.11252	0.184164
ILMN_1213487	AK050213	Cpt1a			-1.09727	0.0377618	-1.19679	0.0472437	-1.23146	0.0990696		1.02834	0.1354	-1.17215	0.0513346	-1.1403	0.0839343
ILMN_1213492	XM_356891.1	LOC383128			-1.09697	0.049718	1.01303	0.0667018	1.09133	0.126135		1.09112	0.0574934	-1.08162	0.0714738	-1.10766	0.144162
ILMN_1213493	XM_908264.3	Gm1614		PREDICTED: Mus musculus gene model 1614, (NCBI) (Gm1614), mRNA.	1.00768	0.0768415	1.03956	0.0622145	-1.0414	0.0631595		1.03791	0.124849	-1.12273	0.10684	-1.11541	0.135182
ILMN_1213495	NM_022030.3	Sv2a	mKIAA0736; AI746429	Mus musculus synaptic vesicle glycoprotein 2 a (Sv2a), mRNA.	-1.10372	0.0520115	1.00862	0.0816255	-1.07655	0.040503		-1.09504	0.122247	-1.11339	0.11948	-1.10102	0.0651359
ILMN_1213497	XM_001000961.1	5830417I10Rik		PREDICTED: Mus musculus RIKEN cDNA 5830417I10 gene (5830417I10Rik), mRNA.	1.04957	0.120658	-1.0041	0.0915123	-1.07497	0.0414852		-1.04824	0.0602595	1.02163	0.031117	-1.02494	0.0447673
ILMN_1213498	NM_080448.4	Srgap3	D130026O08Rik; WRP; AI452337; Gbi; MEGAP; mKIAA0411; Arhgap14	Mus musculus SLIT-ROBO Rho GTPase activating protein 3 (Srgap3), mRNA.	-1.06651	0.0526235	-1.06159	0.239091	-1.10406	0.115171		-1.35603	0.123913	-1.6203	0.14502	-1.55741	0.30587
ILMN_1213506	NM_008383.2	Cep250	Cep2; Inmp; B230210E21Rik; AW490617	Mus musculus centrosomal protein 250 (Cep250), mRNA. XM_902553 XM_907859 XM_920619 XM_920625 XM_920632	-1.17234	0.0649084	-1.07931	0.0805735	-1.10665	0.0584709		-1.07147	0.0285153	-1.11157	0.100183	-1.08062	0.0701841
ILMN_1213515	XM_356496.1	LOC382419			-1.04399	0.0234769	-1.01078	0.0713813	1.07935	0.0873241		-1.0689	0.0481196	-1.02886	0.0809595	-1.00593	0.152792
ILMN_1213518	AK020127	Ivd			-1.09549	0.0312522	-1.18992	0.0820395	-1.28655	0.103475		-1.09708	0.0583895	-1.21625	0.0901439	1.01943	0.162621
ILMN_1213519	NM_194334.2	Tbc1d2b	AW491493; AI480956; AV023399; AV021536; mKIAA1055; 1810061M12Rik	Mus musculus TBC1 domain family, member 2B (Tbc1d2b), mRNA.	1.16733	0.0824575	1.1174	0.0419846	1.18773	0.0503627		1.06483	0.0236677	1.10933	0.00262821	1.05462	0.182107
ILMN_1213521	XM_001479957.1	LOC100048272		PREDICTED: Mus musculus hypothetical protein LOC100048272 (LOC100048272), mRNA.	1.07483	0.128715	-1.02669	0.103658	1.173	0.118794		1.01321	0.0913236	1.11647	0.139415	1.09274	0.0640763
ILMN_1213522	XM_357074.1	LOC383460			1.00051	0.0744083	-1.07911	0.104528	-1.03161	0.161714		-1.18527	0.0434027	-1.08352	0.0658346	-1.07801	0.132662
ILMN_1213524	NM_197982.2	Ddx39	2610307C23Rik; BAT1; DDXL; URH49	Mus musculus DEAD (Asp-Glu-Ala-Asp) box polypeptide 39 (Ddx39), mRNA.	1.00453	0.0795761	1.01559	0.0201752	1.08943	0.153234		-1.16482	0.155999	-1.04444	0.0852213	-1.02215	0.0322724
ILMN_1213531	NM_028320.3	Adipor1	Paqr1; ACDCR1; 2810031L11Rik; CGI-45	Mus musculus adiponectin receptor 1 (Adipor1), mRNA.	-1.03469	0.180229	1.08024	0.0836118	1.15669	0.097429		1.05754	0.120975	1.1341	0.119542	1.06882	0.123892
ILMN_1213534	AK051840	Ssbp2			-1.02727	0.0949843	1.04914	0.0245031	-1.02697	0.0471519		-1.12054	0.124825	1.00192	0.0621946	-1.02264	0.0881379
ILMN_1213535	NM_008710.3	Nnt	BB168308; AI323702; 4930423F13Rik	Mus musculus nicotinamide nucleotide transhydrogenase (Nnt), nuclear gene encoding mitochondrial protein, transcript variant 1, mRNA.	-1.01536	0.0327099	-1.07157	0.104516	-1.20069	0.137084		-1.05422	0.0904683	-1.19968	0.0922532	-1.07371	0.0291577
ILMN_1213541	AK039651	Rfx1			1.08592	0.063979	1.09222	0.0869364	-1.01203	0.100227		-1.0721	0.0776805	-1.09769	0.0942032	-1.02366	0.0733964
ILMN_1213547	XR_031944.1	LOC100045737		PREDICTED: Mus musculus hypothetical protein LOC100045737 (LOC100045737), misc RNA.	1.09188	0.0258817	-1.09598	0.0482496	1.0837	0.112934		1.01457	0.0840608	-1.01355	0.149843	-1.09328	0.09707
ILMN_1213549	NM_030080.2	Creb3l4	Tisp40alpha; mJAL; CREB4; JAL; 1700012K17Rik; Atce1; CREB3; Tisp40beta; AV258827; 5330432F22Rik; AIBZIP; TISP40; AV040530	Mus musculus cAMP responsive element binding protein 3-like 4 (Creb3l4), mRNA.	1.03563	0.0544776	1.00252	0.016506	1.04125	0.0664496		-1.16281	0.0785362	1.0966	0.115919	-1.04272	0.073846
ILMN_1213557	NM_172841	Slco5a1			-1.04746	0.0747213	-1.04735	0.0756608	-1.12015	0.0827489		-1.04858	0.037878	-1.10369	0.0404576	-1.00395	0.0613117
ILMN_1213564	NM_009493.1	Vmn2r42		Mus musculus vomeronasal 2, receptor 42 (Vmn2r42), mRNA.	-1.04121	0.0131964	-1.06828	0.284172	-1.12946	0.102982		-1.08244	0.0288931	1.09224	0.0257695	1.02967	0.193287
ILMN_1213566	AK087219	Galnt3			1.05971	0.054046	1.05304	0.0699202	-1.03583	0.0107563		1.07461	0.113769	1.02949	0.126479	-1.03943	0.129132
ILMN_1213567	NM_001033422.1	Thoc2	Gm1139; 6330441O12Rik; D130005M13Rik; Tho2; Gm1793	Mus musculus THO complex 2 (Thoc2), mRNA.	-1.11177	0.0971884	-1.18757	0.184275	-1.00447	0.135279		1.04221	0.128347	1.00352	0.0737134	1.02222	0.0750563
ILMN_1213569	XM_975744.1	2310047D07Rik		PREDICTED: Mus musculus RIKEN cDNA 2310047D07 gene (2310047D07Rik), mRNA.	-1.01437	0.145949	-1.05409	0.0135421	1.00029	0.054367		1.03442	0.0501802	-1.08263	0.0593849	-1.04905	0.0336801
ILMN_1213572	XR_033559.1	4931440L10Rik		PREDICTED: Mus musculus RIKEN cDNA 4931440L10 gene (4931440L10Rik), misc RNA.	1.12844	0.143286	-1.04129	0.0300551	-1.05412	0.109835		1.01888	0.060834	-1.03863	0.0671834	1.02484	0.0154645
ILMN_1213573	NM_029862.3	5930434B04Rik	RP23-449M10.1	Mus musculus RIKEN cDNA 5930434B04 gene (5930434B04Rik), mRNA.	1.09759	0.0204365	-1.01258	0.121472	1.07984	0.207661		-1.51151	0.181892	-1.47279	0.221211	-1.32113	0.215612
ILMN_1213574	NM_173443.2	Vcpip1	5730421J18Rik; VCIP135; 5730538E15Rik; mKIAA1850; 4932442A08	Mus musculus valosin containing protein (p97)/p47 complex interacting protein 1 (Vcpip1), mRNA.	1.01836	0.2933	-1.03198	0.171619	-1.05824	0.270379		-1.00698	0.168023	1.07685	0.163269	1.1545	0.272333
ILMN_1213579	NM_199313.1	AY053573		Mus musculus cDNA sequence AY053573 (AY053573), mRNA.	1.07434	0.138359	1.00251	0.149358	1.02385	0.0449649		-1.06059	0.0738292	-1.12832	0.0201793	-1.12756	0.183177
ILMN_1213586	AK053852	E130314O04Rik			1.23633	0.122662	1.01662	0.0540049	1.0956	0.161158		-1.00784	0.00618049	-1.02432	0.0949454	1.00234	0.0686721
ILMN_1213587	AK053220	E030044H19Rik			1.02532	0.0129977	1.0521	0.0588042	-1.05171	0.0386273		-1.03822	0.0727893	1.01419	0.0358817	-1.04453	0.0793047
ILMN_1213591	NM_010347	Aes			-1.22659	0.0803542	-1.64067	0.109949	-1.70569	0.0363205		-1.19746	0.0946872	-1.92484	0.0708327	-1.84859	0.110712
ILMN_1213596	NM_008534.1	Ly9			1.55151	0.353869	1.55623	0.368042	1.44219	0.132497		1.52784	0.367515	1.86	0.455552	1.40234	0.137239
ILMN_1213603	XR_001540.2	EG242914		PREDICTED: Mus musculus predicted gene, EG242914 (EG242914), misc RNA.	-1.02584	0.0760365	-1.04163	0.156757	-1.06729	0.0958399		1.03964	0.170058	-1.09192	0.0842177	-1.11502	0.109779
ILMN_1213604	NM_007486.3	Arhgdib	Ly-GDI; Gdid4; D4	Mus musculus Rho, GDP dissociation inhibitor (GDI) beta (Arhgdib), mRNA.	1.01189	0.0825891	1.10175	0.0365634	1.16236	0.279781		-1.1421	0.161878	1.01533	0.128181	1.00193	0.0900058
ILMN_1213609	NM_023719.1	Txnip	Hyplip1; VDUP1; THIF; 1200008J08Rik; AA682105	Mus musculus thioredoxin interacting protein (Txnip), transcript variant 2, mRNA.	-1.39641	0.179107	-1.12027	0.06873	1.00816	0.0672566		-1.34035	0.131266	-1.03133	0.168132	-1.17169	0.334944
ILMN_1213610	XM_358786.1	LOC385612			-1.21007	0.0464065	-1.16063	0.0911305	-1.17951	0.0877941		-1.03559	0.142175	-1.22359	0.0055011	-1.06736	0.0679215
ILMN_1213615	NM_007412.2	Gpr182	Gpcr22; MB10; Gpcr17; NOW; AM-R; G10-D	Mus musculus G protein-coupled receptor 182 (Gpr182), mRNA.	-1.1216	0.332131	-1.33974	0.0892191	-1.01436	0.0407891		-1.19648	0.193096	-1.07931	0.207903	1.11274	0.01786
ILMN_1213616	NM_008568.2	Mcm7	Mcmd7; mCDC47; AI747533	Mus musculus minichromosome maintenance deficient 7 (S. cerevisiae) (Mcm7), mRNA.	1.41952	0.300984	1.48842	0.289506	1.98446	0.460476		-1.05611	0.381369	1.38685	0.261434	-1.00847	1.03871
ILMN_1213617	NM_001038492.1	Ctsa	PPCA; Ppgb; AU019505	Mus musculus cathepsin A (Ctsa), transcript variant 2, mRNA.	-1.06342	0.169997	1.12702	0.183838	1.14229	0.169967		1.15343	0.281319	1.37014	0.264201	1.02095	0.309825
ILMN_1213618	NM_172717.2	Chfr	RNF116; C230082M18; 5730484M20Rik	Mus musculus checkpoint with forkhead and ring finger domains (Chfr), mRNA.	1.17247	0.148834	1.18614	0.0820659	1.13976	0.100863		1.02181	0.117096	1.09519	0.0893961	1.02981	0.0625537
ILMN_1213620	AK042829	A730028E04Rik			-1.05704	0.1763	1.04095	0.169895	-1.01972	0.105067		1.1031	0.0653393	1.21797	0.0799614	1.05612	0.0125508
ILMN_1213625	NM_001080130.1	Tmpo	5630400D24Rik; TP; AI195756; AI606875; AW214352; AW547477; LAP2	Mus musculus thymopoietin (Tmpo), transcript variant 4, mRNA.	1.01809	0.0865005	1.06656	0.0633834	1.06942	0.160728		1.03089	0.00609284	1.16321	0.0783631	-1.02462	0.0702524
ILMN_1213627	AK082565	C230064E22Rik			1.00889	0.0365759	-1.02063	0.0399142	-1.08689	0.0440329		-1.07561	0.102924	-1.13597	0.114263	-1.0522	0.124293
ILMN_1213628	AK044978	Edil3			-1.00148	0.0667109	-1.07187	0.191238	-1.03837	0.179367		1.0204	0.0184652	1.03684	0.0766797	1.00389	0.162781
ILMN_1213630	AK019527	4833444L21Rik			-1.05787	0.0659951	-1.20353	0.0615822	-1.08787	0.121361		-1.02939	0.123903	-1.18924	0.0236645	-1.06284	0.0905028
ILMN_1213631	XM_151491.2	LOC208791			1.11285	0.109201	-1.01557	0.0622844	-1.00296	0.0469896		-1.04166	0.0280136	-1.0913	0.0414956	-1.08795	0.129754
ILMN_1213632	NM_011044.2	Pck1	Pck-1; AI265463; PEPCK	Mus musculus phosphoenolpyruvate carboxykinase 1, cytosolic (Pck1), mRNA.	-1.59979	0.60988	-1.9623	0.208484	-1.12843	0.789415		1.29908	1.02096	-1.21655	0.595133	1.64587	1.5149
ILMN_1213636	AK049320	C330023D02Rik			-1.18241	0.0981144	-2.9209	0.00379009	-2.02249	0.066351		-1.2241	0.281885	-2.97549	0.041065	-2.89031	0.118754
ILMN_1213638	NM_010804.3	Mllt10	KIAA4140; mKIAA4140; D630001B22Rik; B130021D15Rik; Af10	Mus musculus myeloid/lymphoid or mixed-lineage leukemia (trithorax homolog, Drosophila); translocated to, 10 (Mllt10), mRNA.	-1.16389	0.0759002	1.03635	0.110968	-1.24512	0.217511		1.0993	0.132865	-1.04283	0.0634254	1.0256	0.117699
ILMN_1213645	NM_178901.3	AI467606		Mus musculus expressed sequence AI467606 (AI467606), mRNA.	1.44955	0.401093	3.72534	0.980918	4.03796	0.172652		1.57685	1.371	5.26542	0.999079	3.22295	1.86448
ILMN_1213647	AK042583	Tc10l-pending FRAGMENT			1.04093	0.0920103	1.08412	0.233575	1.08977	0.202474		-1.01631	0.0705825	1.28208	0.14729	1.07693	0.107455
ILMN_1213651	XM_001002176.1	Zfp383		PREDICTED: Mus musculus zinc finger protein 383, transcript variant 2 (Zfp383), mRNA.	1.05199	0.0952538	1.05992	0.0346151	1.11211	0.012327		1.02699	0.0449875	-1.02424	0.0300936	-1.01801	0.217537
ILMN_1213653	AK081181	Arts1-pending			1.11557	0.0726967	1.00594	0.112271	-1.1305	0.0856607		1.12096	0.0643928	-1.0748	0.0738064	-1.06772	0.0659893
ILMN_1213656	NM_175256	9530025L16Rik			1.05141	0.0641419	1.12574	0.0831537	1.18165	0.170227		-1.17096	0.13679	-1.02418	0.0612157	-1.04865	0.110821
ILMN_1213657	XM_001473109.1	LOC100039595		PREDICTED: Mus musculus similar to spermiogenesis specific transcript on the Y 1, transcript variant 1 (LOC100039595), mRNA.	-1.01467	0.0856405	-1.03552	0.0273877	-1.06464	0.0434698		-1.08183	0.0789326	-1.15058	0.0638015	-1.09015	0.0626981
ILMN_1213658	AK053001	D930010L03Rik			1.00914	0.0129674	1.09148	0.089494	1.02833	0.111985		-1.01181	0.110191	-1.02477	0.141913	1.04844	0.223186
ILMN_1213660	AK052157	D330001K12Rik			1.02336	0.00254923	-1.0289	0.114797	-1.0352	0.041249		-1.03655	0.023423	1.1215	0.103741	-1.07575	0.107955
ILMN_1213661	AK079969	Man2b2			1.11418	0.0381538	1.97071	0.262959	1.58153	0.365149		1.10838	0.52193	1.53047	0.292442	1.95157	0.257686
ILMN_1213664	XM_976857.1	LOC665425		PREDICTED: Mus musculus similar to T-cell receptor beta chain V region LB2 precursor (LOC665425), mRNA.	1.13497	0.196248	1.19243	0.0476244	1.14725	0.199684		1.12732	0.0851586	1.14431	0.0993574	1.04655	0.0978922
ILMN_1213672	NM_016787.3	Bnip2	BNIP2beta; 5730523P12Rik; Nip21	Mus musculus BCL2/adenovirus E1B interacting protein 1, NIP2 (Bnip2), transcript variant beta, mRNA.	-1.01231	0.108119	-1.00977	0.0820553	-1.10438	0.154715		1.16416	0.114895	1.04869	0.0757106	1.13981	0.0958607
ILMN_1213678	NM_201389.1	Plec1	EBS1; AA591047; AU042537; PLTN; PCN	Mus musculus plectin 1 (Plec1), transcript variant 6, mRNA.	-1.06421	0.0443903	-1.06139	0.0431552	-1.11104	0.101029		1.09399	0.135549	1.07439	0.137831	1.06269	0.0896836
ILMN_1213680	NM_177462.4	Zmym6	AI593204; D4Wsu24e; Zfp258; AI661340; 9330177P20Rik	Mus musculus zinc finger, MYM-type 6 (Zmym6), mRNA.	-1.11097	0.1436	-1.07418	0.0428109	-1.09974	0.0544582		-1.09965	0.0572902	-1.11184	0.163639	1.02305	0.134183
ILMN_1213681	NM_024179.4	0610009O20Rik	2700004E22Rik	Mus musculus RIKEN cDNA 0610009O20 gene (0610009O20Rik), mRNA.	-1.16813	0.205607	-1.25041	0.076471	-1.34958	0.178794		1.00087	0.147633	-1.36052	0.120596	-1.27815	0.27369
ILMN_1213684	AK014706	Psen2			1.02918	0.142006	-1.10276	0.147854	-1.00959	0.101634		-1.05247	0.141599	-1.07507	0.0378611	-1.13962	0.0767894
ILMN_1213688	NM_177095.2	9430076C15Rik			1.1257	0.0637413	-1.00409	0.105433	1.00484	0.0798744		1.091	0.00741832	-1.05312	0.0497597	1.00385	0.0327905
ILMN_1213692	NM_021568.1	Pcbp3	AlphaCP-3	Mus musculus poly(rC) binding protein 3 (Pcbp3), mRNA.	-1.09438	0.205179	1.23348	0.131354	1.12742	0.140233		1.03553	0.165962	1.01964	0.174262	1.08637	0.312874
ILMN_1213702	XM_196444.3	3110007G05Rik			1.10877	0.0412716	1.06415	0.0971834	1.1003	0.0852483		1.14917	0.0884033	1.07058	0.128338	1.02965	0.173797
ILMN_1213703	NM_011308.2	Ncor1	mKIAA1047; 5730405M06Rik; N-CoR; Rxrip13; RIP13; A230020K14Rik	Mus musculus nuclear receptor co-repressor 1 (Ncor1), mRNA.	-1.13489	0.0528133	-1.12347	0.0417084	-1.30806	0.0995181		1.00386	0.0906281	-1.1042	0.0409668	-1.09524	0.0960397
ILMN_1213707	XR_035428.1	LOC628101		PREDICTED: Mus musculus hypothetical LOC628101 (LOC628101), misc RNA.	-1.29743	0.211592	-1.32739	0.190044	-1.38628	0.306909		-1.08967	0.172993	-1.0555	0.198769	-1.15465	0.369102
ILMN_1213708	AK028848	4732462B05Rik			1.06303	0.0391936	1.84328	0.249123	2.38339	0.241447		1.24741	0.514878	2.30505	0.336874	2.24535	0.144933
ILMN_1213711	NM_001024206.1	Trappc1	BET5; MUM2; D11Ertd172e	Mus musculus trafficking protein particle complex 1 (Trappc1), mRNA.	1.05915	0.106757	1.1541	0.121034	1.07371	0.0371818		-1.0744	0.103045	1.06946	0.00991782	-1.008	0.190133
ILMN_1213721	NM_146803.2	Olfr906	MOR167-2	Mus musculus olfactory receptor 906 (Olfr906), mRNA.	-1.00373	0.0552492	-1.1173	0.040678	-1.21262	0.0991593		1.04951	0.163476	-1.08661	0.0476398	-1.05996	0.0564593
ILMN_1213725	NM_016918.3	Nudt5		Mus musculus nudix (nucleoside diphosphate linked moiety X)-type motif 5 (Nudt5), mRNA.	1.2018	0.193737	1.41646	0.0831083	1.23043	0.1728		1.18189	0.103159	1.39916	0.0613054	1.0934	0.0309414
ILMN_1213727	AK042009	Il7			-1.0267	0.0644144	-1.05054	0.0392601	-1.11981	0.0864824		-1.01199	0.103202	-1.0155	0.123756	1.03316	0.106125
ILMN_1213728	NM_177067.2	3110048E14Rik	C230014M12Rik	Mus musculus RIKEN cDNA 3110048E14 gene (3110048E14Rik), transcript variant 2, mRNA.	1.1302	0.04713	1.2571	0.124056	1.11731	0.128425		1.07149	0.121381	1.03611	0.13633	-1.05672	0.146533
ILMN_1213734	NM_178337.2	Tbce	2610206D02Rik; C530005D02Rik; pmn	Mus musculus tubulin-specific chaperone e (Tbce), mRNA.	1.02108	0.0910609	-1.11065	0.080263	-1.09995	0.0604263		-1.05112	0.138728	-1.17735	0.107842	-1.04571	0.0405806
ILMN_1213736	NM_027519.3	6330406I15Rik	MGC143803; MGC143804	Mus musculus RIKEN cDNA 6330406I15 gene (6330406I15Rik), mRNA.	-1.05073	0.0923114	2.29496	0.441897	2.51729	0.287361		1.25528	0.940659	2.83602	0.24471	2.12792	0.253384
ILMN_1213745	NM_153414.3	Ints9	BC028953; D14Ertd231e	Mus musculus integrator complex subunit 9 (Ints9), mRNA.	1.02452	0.169246	1.06513	0.0682785	1.25989	0.225461		1.06851	0.103863	1.01907	0.0610307	1.12629	0.515684
ILMN_1213746	AK045231	B130049M08Rik			1.13711	0.0218889	1.03116	0.142664	1.00472	0.136911		1.02006	0.0428429	-1.08337	0.0846144	-1.05942	0.0544315
ILMN_1213749	XM_977900.1	Nek10		PREDICTED: Mus musculus NIMA (never in mitosis gene a)- related kinase 10 (Nek10), mRNA.	-1.01379	0.0707002	-1.06163	0.0971728	-1.09067	0.0230216		1.00313	0.0142908	-1.04739	0.06677	-1.03534	0.0746404
ILMN_1213750	NM_053135.2	Pcdhb10	PcdhbJ; Pcdhb5D	Mus musculus protocadherin beta 10 (Pcdhb10), mRNA.	1.0634	0.084786	1.09972	0.0934971	1.04906	0.141093		-1.08685	0.188297	1.04521	0.0677745	1.03485	0.0277058
ILMN_1213752	XM_357757.1	LOC384635			1.07209	0.0863161	1.01097	0.148108	-1.04415	0.144934		-1.02905	0.0206982	-1.1515	0.0717456	1.00064	0.073989
ILMN_1213753	XR_004663.1	LOC268781		PREDICTED: Mus musculus similar to Myotubularin related protein 3 (LOC268781), misc RNA.	-1.03139	0.0325641	1.01014	0.0403108	1.0235	0.0830061		-1.0776	0.0839443	1.05735	0.0722624	1.02774	0.193158
ILMN_1213756	XM_489578	5330426P16Rik			1.11673	0.0224206	1.09507	0.0734741	1.0431	0.137849		1.08661	0.0553092	1.12574	0.0703329	1.0708	0.0430162
ILMN_1213760	XM_356397.1	LOC382279			-1.0006	0.144872	-1.00697	0.072618	-1.07052	0.0460705		1.0282	0.0436478	-1.0388	0.021242	-1.09695	0.0602441
ILMN_1213763	NM_176916.4	Pld5	B230365F16Rik	Mus musculus phospholipase D family, member 5 (Pld5), mRNA. XM_899968 XM_915002 XM_923506 XM_923510 XM_923521 XM_923527	-1.14548	0.0207374	1.04552	0.0929732	-1.05649	0.186605		1.06265	0.0754043	1.01892	0.0764856	1.09204	0.118807
ILMN_1213770	XM_986046.1	6330416L11Rik		PREDICTED: Mus musculus RIKEN cDNA 6330416L11 gene (6330416L11Rik), mRNA.	1.04957	0.10516	1.1168	0.105585	1.10456	0.05647		-1.01462	0.0874846	-1.05256	0.121492	1.02171	0.0657946
ILMN_1213772	AK030898	Mynn			-1.02675	0.0624846	1.01501	0.0759136	-1.02713	0.199458		-1.24747	0.238672	-1.27724	0.287156	-1.31145	0.12538
ILMN_1213777	NM_008002.3	Fgf10	FGF-10; BB213776	Mus musculus fibroblast growth factor 10 (Fgf10), mRNA.	-1.27791	0.107165	-1.04367	0.060743	-1.05889	0.00458854		1.0339	0.0321153	-1.08764	0.0972917	-1.18421	0.152292
ILMN_1213779	NM_194348.3	Atg2a	mKIAA0404; MGC67447; A830054M12; 1810013C15Rik; BC023754	Mus musculus ATG2 autophagy related 2 homolog A (S. cerevisiae) (Atg2a), mRNA.	1.03332	0.0438897	-1.00529	0.118927	1.31301	0.205633		-1.13469	0.127774	-1.05661	0.0472464	1.10438	0.395322
ILMN_1213781	XM_001474718.1	LOC100045668		PREDICTED: Mus musculus similar to Rpl17 protein (LOC100045668), mRNA.	-1.12846	0.140828	-1.1468	0.276677	1.06662	0.285924		-1.26585	0.0269381	1.08835	0.117682	1.17311	0.272213
ILMN_1213784	AK050126	C730018L13Rik			-1.14865	0.321657	-2.20553	0.101995	-2.00664	0.0902552		-1.45557	0.215533	-2.02522	0.0746319	-1.60561	0.222288
ILMN_1213786	NM_001081323.1	Mphosph9	B930097C17Rik; 4930548D04Rik; AW547060; MPP9; 9630025B04Rik; AW413446; MPP-9; C87456	Mus musculus M-phase phosphoprotein 9 (Mphosph9), mRNA.	1.17755	0.0303601	1.53771	0.118778	1.2034	0.161982		1.13493	0.335265	1.58236	0.108143	1.31006	0.147297
ILMN_1213787	NM_009646.1	Aire	MGC123375; MGC123374	Mus musculus autoimmune regulator (autoimmune polyendocrinopathy candidiasis ectodermal dystrophy) (Aire), mRNA.	-1.03068	0.122352	-1.09626	0.0229397	-1.13047	0.212175		1.03768	0.060562	1.01019	0.163608	1.06221	0.124518
ILMN_1213789	NM_029984.1	A930021C24Rik		Mus musculus RIKEN cDNA A930021C24 gene (A930021C24Rik), mRNA.	1.01651	0.091372	1.03819	0.150561	1.03855	0.0324313		1.00237	0.0227634	1.11707	0.18131	1.04268	0.0546072
ILMN_1213799	NM_080728.1	Myh7			-1.0658	0.217018	-1.62332	0.0223577	-1.41352	0.141292		-1.16658	0.294909	-1.50417	0.161255	-1.77615	0.0956902
ILMN_1213802	XM_355508.1	LOC381539			-1.08144	0.120071	-1.25419	0.0434369	-1.25892	0.0846312		-1.07386	0.0493513	-1.106	0.1563	-1.08032	0.104249
ILMN_1213803	XR_031485.1	EG633120		PREDICTED: Mus musculus predicted gene, EG633120 (EG633120), misc RNA.	-1.0461	0.0931096	1.0026	0.106651	-1.02212	0.0863383		1.05813	0.0893131	-1.02003	0.0429389	1.0381	0.0790882
ILMN_1213804	AK051967	D230026E03Rik			-1.06253	0.0670008	-1.10378	0.062501	-1.03941	0.0347257		1.02003	0.147702	-1.07257	0.105365	-1.03157	0.0593485
ILMN_1213805	NM_146148.1	C8a	MGC29381	Mus musculus complement component 8, alpha polypeptide (C8a), mRNA.	1.11572	0.193766	1.28846	0.549078	1.59742	0.641198		-1.0623	0.196106	1.87298	0.294843	2.20764	1.04165
ILMN_1213808	XM_194481.2	LOC270186			-1.02843	0.335649	1.10842	0.41128	1.30593	0.83308		1.02814	0.389957	1.31571	0.27449	1.23569	0.348446
ILMN_1213809	NM_182806.1	Gpr18		Mus musculus G protein-coupled receptor 18 (Gpr18), mRNA.	1.76117	0.274051	2.9199	0.542442	2.37867	0.383913		1.96106	0.571424	3.3615	0.039159	2.06048	1.17584
ILMN_1213811	NM_008290.2	Hsd17b2	AI194967	Mus musculus hydroxysteroid (17-beta) dehydrogenase 2 (Hsd17b2), mRNA.	1.04531	0.0852196	-1.37173	0.23388	-1.53078	0.0297208		-1.47054	0.08039	-2.02044	0.0769517	-1.96681	0.196844
ILMN_1213815	AK082709	Mtap6			-1.07937	0.0942365	-1.17343	0.054416	-1.09599	0.118934		-1.00117	0.115829	-1.04759	0.0932999	-1.01725	0.0858969
ILMN_1213816	XM_001471965.1	Ppp2r3a		PREDICTED: Mus musculus protein phosphatase 2 (formerly 2A), regulatory subunit B'', alpha (Ppp2r3a), mRNA.	1.04343	0.175377	-1.1577	0.0969116	1.00663	0.161417		-1.15926	0.053381	-1.0736	0.119142	1.06422	0.153547
ILMN_1213817	NM_001039544.1	Mup3	MUP III; Mup-3; MUP15; MGC117854	Mus musculus major urinary protein 3 (Mup3), mRNA.	-1.21993	0.22707	-10.896	0.0343744	-32.4783	0.192571		1.09632	0.59276	-5.49001	0.0914329	-2.62632	0.187613
ILMN_1213823	NM_024190	2810405I11Rik			1.00529	0.0445339	1.0957	0.25061	1.0274	0.0961531		-1.06609	0.0857192	-1.1007	0.0972359	1.0317	0.0668284
ILMN_1213824	XM_001473420.1	LOC100039742		PREDICTED: Mus musculus similar to SP140 nuclear body protein family member (LOC100039742), mRNA.	2.60621	0.890606	4.80892	1.32243	2.79857	0.737413		1.12984	2.55429	1.6131	2.47855	1.25515	1.43498
ILMN_1213834	XM_356881.1	LOC383110			1.03887	0.142606	1.14985	0.0464682	1.14573	0.260587		-1.03272	0.200765	1.10969	0.0619248	1.07247	0.189872
ILMN_1213836	NM_008530.2	Ly6f		Mus musculus lymphocyte antigen 6 complex, locus F (Ly6f), mRNA.	-1.0299	0.182298	-1.12327	0.174831	-1.21113	0.22097		-1.02701	0.0505157	-1.00153	0.0148388	1.07849	0.166262
ILMN_1213838	NM_175164.4	Arhgap26	1810044B20Rik; mKIAA0621; AI853435; 4933432P15Rik; 2610010G17Rik	Mus musculus Rho GTPase activating protein 26 (Arhgap26), mRNA.	-1.25468	0.365351	-2.83694	0.133726	-2.6651	0.165804		-1.37845	0.257796	-1.85737	0.112879	-1.86462	0.028834
ILMN_1213840	AK087403	E130007O11Rik			1.0803	0.0220224	1.08985	0.17316	1.00805	0.0946898		1.05161	0.0732233	-1.03451	0.0217547	-1.08692	0.121839
ILMN_1213841	XM_357248.1	LOC383785			1.02312	0.0629558	-1.19959	0.195081	-1.21864	0.0255965		-1.16987	0.182876	1.03355	0.128578	-1.18599	0.0190575
ILMN_1213848	NM_008403.4	Itgb1bp1	AU019480; bodenin; AI449260	Mus musculus integrin beta 1 binding protein 1 (Itgb1bp1), mRNA.	1.09631	0.107251	1.06384	0.141447	-1.02033	0.0660937		1.29828	0.225349	-1.03643	0.130073	1.01212	0.140868
ILMN_1213850	NM_007734.2	Col4a3	tumstatin; alpha3(IV); [a]3(IV)	Mus musculus collagen, type IV, alpha 3 (Col4a3), mRNA.	1.08506	0.106897	-1.04479	0.215878	1.15983	0.735208		-1.05096	0.119334	1.13715	0.0495682	1.62545	0.141082
ILMN_1213855	NM_021388.3	Extl2	3000001D04Rik; AW146439	Mus musculus exostoses (multiple)-like 2 (Extl2), mRNA.	1.2489	0.0915918	1.02755	0.110052	-1.18894	0.0673284		1.18144	0.0930676	1.03465	0.104899	-1.03796	0.169988
ILMN_1213856	NM_146682.1	Olfr76	MOR215-3; V5	Mus musculus olfactory receptor 76 (Olfr76), mRNA.	-1.0247	0.137825	1.02873	0.0422375	-1.06896	0.0500407		-1.01827	0.0149103	-1.04865	0.0738356	-1.14835	0.161379
ILMN_1213857	XR_033543.1	LOC100046946		PREDICTED: Mus musculus similar to serine (or cysteine) proteinase inhibitor, clade A, member 1c (LOC100046946), misc RNA.	-1.12187	0.13855	-1.14657	0.067983	-1.14535	0.048644		-1.04604	0.075608	-1.09861	0.0346259	-1.05179	0.0429689
ILMN_1213858	NM_026348.3	Itgb3bp	AU022583; 4930471O16Rik	Mus musculus integrin beta 3 binding protein (beta3-endonexin) (Itgb3bp), mRNA.	1.09122	0.231721	1.02994	0.147718	-1.02836	0.169633		1.18775	0.219324	1.18017	0.198211	1.21108	0.226116
ILMN_1213859	XR_035323.1	C130046B21Rik		PREDICTED: Mus musculus RIKEN cDNA C130046B21 gene (C130046B21Rik), misc RNA.	1.02203	0.151963	-1.13096	0.118562	-1.0073	0.0442933		1.04437	0.186139	1.05511	0.142433	-1.08329	0.0884169
ILMN_1213862	NM_027804.2	Usp19	AI047774; 8430421I07Rik; Zmynd9	Mus musculus ubiquitin specific peptidase 19 (Usp19), mRNA.	1.07046	0.0171082	1.08778	0.0953844	1.22098	0.0457356		1.00029	0.0930047	-1.02364	0.0767207	-1.00571	0.298295
ILMN_1213866	NM_029745.2	Tbc1d9b	AU019384; RP23-319B15.5; 2700008N14Rik	Mus musculus TBC1 domain family, member 9B (Tbc1d9b), mRNA.	-1.08022	0.108153	-1.19078	0.0229091	-1.13681	0.186317		-1.14048	0.108269	-1.06783	0.153137	-1.25619	0.182763
ILMN_1213868	AK007768	1810044B20Rik			-1.18763	0.259639	-1.69113	0.0578887	-1.70166	0.10201		-1.23721	0.172789	-1.44565	0.107133	-1.48049	0.0188785
ILMN_1213872	NM_178652.2	Supt3h	AI315192; 2310066G22Rik; SPT3L; SPT3	Mus musculus suppressor of Ty 3 homolog (S. cerevisiae) (Supt3h), mRNA.	-1.03351	0.143068	-1.22756	0.095484	-1.19527	0.026732		-1.03054	0.0904278	-1.35109	0.0721334	-1.58983	0.345736
ILMN_1213873	NM_007996.1	Fdx1		Mus musculus ferredoxin 1 (Fdx1), nuclear gene encoding mitochondrial protein, mRNA.	1.02918	0.193367	-1.05299	0.0885316	1.05857	0.0782143		1.04118	0.171954	-1.15581	0.0546597	-1.02488	0.0470846
ILMN_1213875	XM_001475726.1	C920006O11Rik		PREDICTED: Mus musculus RIKEN cDNA C920006O11 gene (C920006O11Rik), mRNA.	-1.02694	0.151614	-1.10769	0.122335	-1.09227	0.159965		-1.01004	0.0564588	1.16061	0.156855	1.0619	0.0980048
ILMN_1213880	NM_147060	Olfr667			1.06898	0.172902	-1.0191	0.0339859	1.14017	0.154064		-1.1563	0.0533882	1.03393	0.0645512	-1.0425	0.0910686
ILMN_1213881	NM_144522	1110003P22Rik			1.32021	0.0704126	2.46585	0.239479	2.63265	0.183051		1.16293	1.21353	2.24059	0.675359	1.75661	1.27254
ILMN_1213882	XR_034180.1	LOC675567		PREDICTED: Mus musculus similar to RCC1 domain containing 1 (LOC675567), misc RNA.	1.25309	0.027867	1.26316	0.0278187	-1.02576	0.171874		1.03807	0.305757	1.06161	0.282284	1.19569	0.0911748
ILMN_1213883	NM_021518.3	Rab2a	9330148M11Rik; C80220	Mus musculus RAB2A, member RAS oncogene family (Rab2a), mRNA.	-1.03162	0.0411511	-1.19548	0.0867106	-1.36376	0.0452416		1.02812	0.0900513	-1.08114	0.0827941	-1.07133	0.259131
ILMN_1213886	NM_010791.3	Meox1	Mox1; D330041M02Rik; AI385561; Mox-1	Mus musculus mesenchyme homeobox 1 (Meox1), mRNA.	1.2879	0.0813871	1.48766	0.424901	1.83236	0.112608		1.21378	0.159395	1.1862	0.0986867	1.26855	0.551109
ILMN_1213889	AK035989	9630025C19Rik			1.03977	0.101586	1.05071	0.167951	1.00547	0.0953754		-1.19468	0.134022	-1.22611	0.149649	-1.22968	0.112887
ILMN_1213898	XM_149149.1	LOC228036			1.04859	0.0896086	-1.08358	0.0229919	-1.02877	0.238471		-1.15505	0.0812981	-1.12624	0.028589	-1.38711	0.0787862
ILMN_1213899	NM_173741.2	Wdr24	MGC47001; BC037651	Mus musculus WD repeat domain 24 (Wdr24), mRNA.	-1.03358	0.121857	-1.10851	0.12422	-1.0472	0.106428		-1.28499	0.1005	-1.355	0.0923327	-1.21026	0.338974
ILMN_1213906	XM_357712.1	LOC384565			-1.06349	0.0522901	1.00009	0.152541	-1.01128	0.130514		-1.07372	0.0488182	-1.18005	0.0517028	-1.0371	0.0525574
ILMN_1213910	NM_011444.1	Sox5	AI528773; MGC124352	Mus musculus SRY-box containing gene 5 (Sox5), mRNA.	1.0477	0.142001	-1.1223	0.0305039	1.00293	0.0822925		-1.32503	0.153831	-1.35473	0.190643	-1.32007	0.175119
ILMN_1213911	NM_201372.3	Ccdc84	Gm1114; MGC106805; D630044F24Rik	Mus musculus coiled-coil domain containing 84 (Ccdc84), mRNA.	-1.0103	0.0991282	-1.12126	0.159851	-1.04196	0.189799		-1.07642	0.0542921	-1.38815	0.089676	-1.2564	0.0926681
ILMN_1213912	AK052936.1	scl000994.1_0			-1.13198	0.0944644	-1.24037	0.148188	-1.22117	0.116507		1.01741	0.136849	1.06239	0.19344	1.01226	0.123591
ILMN_1213914	NM_020582.2	Atp5j2	1110019H14Rik	Mus musculus ATP synthase, H+ transporting, mitochondrial F0 complex, subunit f, isoform 2 (Atp5j2), nuclear gene encoding mitochondrial protein, mRNA.	-1.09101	0.158321	-1.3375	0.0986267	-1.33145	0.144714		1.10563	0.255018	-1.31491	0.112417	-1.31666	0.068334
ILMN_1213915	NM_178716.3	Tnpo1	TRN; IPO2; MIP; MIP1; AU021749; D13Ertd688e; Kpnb2	Mus musculus transportin 1 (Tnpo1), transcript variant 1, mRNA.	-1.1817	0.0481977	-1.16296	0.0199503	-1.02653	0.0505528		1.01593	0.278761	1.01658	0.235756	1.08952	0.0374177
ILMN_1213917	NM_178036.3	Lcn10	9230112J07Rik	Mus musculus lipocalin 10 (Lcn10), mRNA.	-1.22163	0.0342985	-1.14426	0.0359219	-1.19429	0.126513		1.10944	0.1005	1.03663	0.126327	1.03242	0.126883
ILMN_1213920	NM_023290.2	Mkrn2	2610002L04Rik; C81377	Mus musculus makorin, ring finger protein, 2 (Mkrn2), mRNA.	-1.1512	0.0396675	-1.61087	0.0715746	-1.27865	0.130817		-1.076	0.313584	-1.59886	0.0782135	-1.53997	0.115492
ILMN_1213921	XM_912265.2	Troap		PREDICTED: Mus musculus trophinin associated protein (Troap), mRNA.	1.44957	0.34357	2.72285	0.585518	2.30757	0.155702		1.27036	1.02165	2.86134	0.433668	1.49065	1.11789
ILMN_1213922	NM_053196.3	Sfxn2	F630107H02Rik; C79732	Mus musculus sideroflexin 2 (Sfxn2), mRNA.	-1.15896	0.352862	-1.92968	0.23032	-1.20354	0.396143		-1.3621	0.146596	-1.37593	0.105114	-1.28804	0.169014
ILMN_1213929	NM_027332.2	Bxdc5	2310066N05Rik; Rpf1; MGC102255; 2210420E24Rik	Mus musculus brix domain containing 5 (Bxdc5), transcript variant 1, mRNA.	1.00099	0.125605	1.06795	0.0639893	1.11164	0.0523401		1.15044	0.0391885	1.09346	0.165421	1.14534	0.156967
ILMN_1213935	NM_009652.2	Akt1	PKBalpha; Akt; PKB; PKB/Akt	Mus musculus thymoma viral proto-oncogene 1 (Akt1), mRNA.	1.05949	0.217196	-1.0395	0.0350955	1.03945	0.0747082		-1.00645	0.0507456	1.05473	0.194493	1.00656	0.143564
ILMN_1213939	NM_028568.1	Dusp21	Dusp21; RP23-243E14.1; 1700094E07Rik	Mus musculus dual specificity phosphatase 21 (Dusp21), mRNA.	-1.04141	0.115753	1.21817	0.191282	-1.05342	0.0441113		-1.03023	0.254617	-1.13582	0.287944	-1.12494	0.0603222
ILMN_1213941	NM_008657.2	Myf6	herculin; MRF4	Mus musculus myogenic factor 6 (Myf6), mRNA.	-1.69173	0.0419581	-1.54557	0.0297283	-1.49101	0.111045		1.11071	0.210497	-1.15177	0.186151	-1.12501	0.114609
ILMN_1213947	NM_172685.3	Slc25a24	2610016M12Rik	Mus musculus solute carrier family 25 (mitochondrial carrier, phosphate carrier), member 24 (Slc25a24), nuclear gene encoding mitochondrial protein, mRNA.	-1.22231	0.0503216	1.02094	0.258061	1.0458	0.278945		-1.15288	0.0654021	1.16043	0.154158	1.02183	0.222692
ILMN_1213952	XM_488723	D130009I18Rik			1.10249	0.188568	1.15018	0.229387	-1.00906	0.0763995		-1.08167	0.103096	-1.05826	0.101162	-1.05756	0.139997
ILMN_1213954	NM_011361.1	Sgk1	Sgk1	Mus musculus serum/glucocorticoid regulated kinase 1 (Sgk1), mRNA.	1.4665	0.190345	2.16059	0.401025	2.19931	0.378433		2.36652	0.252429	2.64319	0.769454	2.77423	0.836614
ILMN_1213957	XM_285129.2	LOC332100			-1.19058	0.0638896	-1.12596	0.115233	-1.12056	0.133429		-1.04939	0.109148	-1.09488	0.0486846	-1.15944	0.0501625
ILMN_1213958	NM_009147.2	Sec23a	Msec23; Sec23r	Mus musculus SEC23A (S. cerevisiae) (Sec23a), mRNA.	-1.04025	0.0529632	-1.27853	0.0458574	-1.51309	0.267601		-1.10174	0.211728	-1.09704	0.231541	-1.48114	0.259832
ILMN_1213960	NM_017402.3	Arhgef7	Pak3bp; betaPix-b; PIX; mKIAA0142; Cool; betaPix-c; p85SPR; p85Cool1	Mus musculus Rho guanine nucleotide exchange factor (GEF7) (Arhgef7), mRNA.	1.01123	0.0758168	-1.02727	0.0905977	-1.02838	0.152699		1.1267	0.0974879	1.19412	0.215018	1.05618	0.176859
ILMN_1213961	AK079599	Copg2			1.07518	0.220512	1.07528	0.224241	-1.01579	0.111567		-1.05216	0.143381	-1.37637	0.212031	-1.11437	0.0801603
ILMN_1213963	NM_176979.5	Topbp1	AI256758; mKIAA0259; 2810429C13Rik; 1110031N14Rik; D430026L04Rik	Mus musculus topoisomerase (DNA) II beta binding protein (Topbp1), mRNA.	1.09342	0.0297259	1.11086	0.0598673	-1.02676	0.134054		1.07395	0.0541808	1.0293	0.0323674	-1.01147	0.0647057
ILMN_1213968	XM_988992.1	EG631304		PREDICTED: Mus musculus predicted gene, EG631304 (EG631304), mRNA.	-1.08865	0.107301	-1.06869	0.0421644	-1.02733	0.0460805		-1.10508	0.0543314	-1.0474	0.012104	-1.01783	0.0341595
ILMN_1213971	NM_172717.2	Chfr	RNF116; C230082M18; 5730484M20Rik	Mus musculus checkpoint with forkhead and ring finger domains (Chfr), mRNA.	1.02189	0.14982	-1.10942	0.0127116	-1.12253	0.169529		1.1151	0.111183	-1.01762	0.0910823	-1.0169	0.0428905
ILMN_1213975	NM_021530.2	Slc4a8	C230026C11; kNBC-3; AW493845	Mus musculus solute carrier family 4 (anion exchanger), member 8 (Slc4a8), mRNA.	1.09443	0.0945579	1.21016	0.0726422	1.21707	0.13185		1.24829	0.176773	1.23729	0.0310749	1.13735	0.13345
ILMN_1213978	NM_011216.2	Ptpro	GLEPP1; PTPROt; PTP-phi; PTP-BK; PTP-U2	Mus musculus protein tyrosine phosphatase, receptor type, O (Ptpro), mRNA.	1.43752	0.0980674	2.52224	1.14159	2.23829	0.90294		1.37536	0.497998	4.49767	1.38121	2.8408	0.425197
ILMN_1213981	NM_010774.1	Mbd4	Med1	Mus musculus methyl-CpG binding domain protein 4 (Mbd4), mRNA.	-1.13021	0.128978	1.24261	0.140905	1.03571	0.115039		-1.0528	0.243532	1.45014	0.173196	1.24686	0.190444
ILMN_1213982	NM_027109.1	Dnase1l1	G4.8; AI324885; 2310005K03Rik	Mus musculus deoxyribonuclease 1-like 1 (Dnase1l1), mRNA.	1.1091	0.399709	1.2828	0.474795	1.31808	0.572075		-1.05886	0.476694	1.409	0.351671	1.29025	0.383497
ILMN_1213984	XM_487781	4930448K20Rik			-1.12246	0.0347635	-1.09495	0.141491	-1.15422	0.0200469		-1.05502	0.111699	-1.27962	0.0398699	-1.10837	0.0601717
ILMN_1213985	XR_035184.1	2810025M15Rik		PREDICTED: Mus musculus RIKEN cDNA 2810025M15 gene (2810025M15Rik), misc RNA.	1.18809	0.211939	1.30508	0.137582	1.26512	0.156225		1.22544	0.0587868	1.58916	0.256473	1.18756	0.314289
ILMN_1213986	XM_149644.3	LOC380617			1.10277	0.13815	1.49302	0.189153	2.01628	0.323115		1.28634	0.121575	1.38611	0.11499	1.28832	0.673813
ILMN_1213989	NM_022995.3	Pmepa1	2210418I02Rik; Erg1.2; AW455466; Stag1; Pmepa1; N4wbp4	Mus musculus prostate transmembrane protein, androgen induced 1 (Pmepa1), mRNA.	-1.07048	0.0403169	1.37752	0.120696	1.5752	0.0873532		-1.07247	0.38544	1.39994	0.13439	1.17745	0.60873
ILMN_1213992	XM_488676	C230040D14			-1.01525	0.151567	1.05373	0.231284	-1.02773	0.0889296		1.03315	0.0800038	-1.0083	0.18471	-1.04674	0.0722145
ILMN_1214000	XM_001478434.1	LOC100044133		PREDICTED: Mus musculus similar to gamma-aminobutyric acid (GABA-A) receptor, subunit epsilon (LOC100044133), mRNA.	-1.05332	0.214269	-1.01029	0.150711	-1.04021	0.0545855		1.02059	0.0297543	-1.04704	0.0783387	-1.00603	0.094249
ILMN_1214006	AK039513	C030038O19Rik			-1.07877	0.0962403	-1.05541	0.0877061	-1.03283	0.0699761		-1.09216	0.0655259	-1.10089	0.184694	-1.08528	0.177194
ILMN_1214013	XM_919429.2	4930527J03Rik		PREDICTED: Mus musculus RIKEN cDNA 4930527J03 gene (4930527J03Rik), mRNA.	-1.06638	0.041708	1.00951	0.0675235	-1.05317	0.152433		1.03157	0.111897	-1.06796	0.0951321	1.05354	0.0617902
ILMN_1214015	XM_619443.3	Baiap3		PREDICTED: Mus musculus BAI1-associated protein 3 (Baiap3), mRNA.	-1.05826	0.107558	-1.03639	0.0456985	-1.15152	0.077539		-1.03764	0.00730423	-1.0905	0.0780197	-1.03489	0.00528525
ILMN_1214016	NM_001004357.1	Cntnap2	5430425M22Rik; mKIAA0868; Caspr2	Mus musculus contactin associated protein-like 2 (Cntnap2), transcript variant 1, mRNA.	-1.06734	0.0238795	-1.10349	0.0202464	1.00382	0.120612		-1.06712	0.0193915	-1.15377	0.110456	-1.18137	0.0816621
ILMN_1214020	XM_357806.1	LOC384706			1.00594	0.0914495	-1.07133	0.0459185	-1.03319	0.0961702		-1.06045	0.0234802	-1.00252	0.0229523	1.04786	0.0251017
ILMN_1214024	AK009124	2310003M01Rik			-2.03171	0.0254109	-1.90001	0.151777	-2.01144	0.215508		1.41014	0.257492	-1.15371	0.240359	-1.13403	0.202316
ILMN_1214025	NM_145490.4	BC011426	MGC18740	Mus musculus cDNA sequence BC011426 (BC011426), mRNA.	1.05147	0.208395	-1.09352	0.110142	1.02632	0.148494		1.09538	0.135858	1.1343	0.119587	1.04325	0.120141
ILMN_1214026	XM_359137.1	LOC386246			-1.02913	0.220139	-1.35523	0.136329	-1.04463	0.28534		-1.2161	0.105651	-1.29228	0.119917	-1.16574	0.229163
ILMN_1214031	NM_175030.2	Tctex1d4		Mus musculus Tctex1 domain containing 4 (Tctex1d4), mRNA.	1.07931	0.053009	-1.03375	0.0274063	-1.09618	0.195616		-1.02574	0.124347	1.09104	0.172511	1.05577	0.0683575
ILMN_1214036	NM_144835.4	Heatr1	BC019693; MGC30806; B130016L12Rik; AA517551	Mus musculus HEAT repeat containing 1 (Heatr1), mRNA.	1.14529	0.171367	1.52205	0.142957	1.50104	0.23593		1.13572	0.27736	1.4058	0.0602919	1.62774	0.370894
ILMN_1214039	XM_921217.3	Prrg1		PREDICTED: Mus musculus proline rich Gla (G-carboxyglutamic acid) 1, transcript variant 10 (Prrg1), mRNA.	-1.02996	0.0719631	1.03533	0.0406752	1.04224	0.0467441		1.0227	0.109645	1.01811	0.0837778	1.00111	0.0664092
ILMN_1214043	AK053797	E130309A10Rik			-1.13484	0.0893915	-1.35082	0.142923	-1.32197	0.0878739		-1.08803	0.149361	-1.21464	0.0249145	-1.08317	0.176845
ILMN_1214044	NM_147009.2	Olfr389	RP23-180L15.4; MOR135-6	Mus musculus olfactory receptor 389 (Olfr389), mRNA.	1.02431	0.0979899	1.03545	0.121242	1.00192	0.066753		1.01772	0.012411	-1.04269	0.148916	-1.05416	0.104957
ILMN_1214046	AK048369	Cstn2-pending			1.06372	0.117322	1.0044	0.141777	1.02011	0.139383		-1.03635	0.0506564	-1.12619	0.0559757	-1.13048	0.225942
ILMN_1214050	NM_026039.2	Med18	2810046C01Rik	Mus musculus mediator of RNA polymerase II transcription, subunit 18 homolog (yeast) (Med18), mRNA.	-1.01732	0.0632024	1.25118	0.148588	1.35837	0.188813		1.05914	0.270992	1.28044	0.149247	1.20622	0.18058
ILMN_1214052	XM_984603.2	2700046A07Rik		PREDICTED: Mus musculus RIKEN cDNA 2700046A07 gene (2700046A07Rik), mRNA.	-1.04873	0.0114014	-1.01772	0.0905972	1.12237	0.0809404		1.05807	0.149306	1.03877	0.149324	-1.03454	0.188523
ILMN_1214053	NM_009564.1	Zfp64		Mus musculus zinc finger protein 64 (Zfp64), mRNA.	1.22788	0.0387104	1.0938	0.09744	1.34219	0.0390872		1.07923	0.125693	1.15292	0.137423	1.09762	0.359731
ILMN_1214054	NM_133967.3	Zdhhc7	AL024087; Gramp2	Mus musculus zinc finger, DHHC domain containing 7 (Zdhhc7), mRNA.	1.15695	0.0374253	1.29832	0.0960009	1.26387	0.144741		1.28214	0.0271843	1.37365	0.062072	1.15048	0.462278
ILMN_1214057	NM_178616.3	Psmd11	S9; C78232; 1810019E17Rik; 1700089D09Rik; 2610024G20Rik; 2810055C24Rik; P44.5	Mus musculus proteasome (prosome, macropain) 26S subunit, non-ATPase, 11 (Psmd11), mRNA.	-1.04021	0.614719	-1.05877	0.217863	-1.03459	0.490847		-1.03404	0.422703	-1.2252	0.491778	-1.22521	0.166991
ILMN_1214059	NM_001038619.1	Dnm3	B230343F03Rik; 9630020E24Rik; AW061159; C530045C17; mKIAA0820	Mus musculus dynamin 3 (Dnm3), mRNA.	1.10262	0.0601264	-1.06268	0.0564471	-1.02527	0.0657438		-1.10984	0.0322551	-1.05368	0.0814525	-1.00723	0.0344954
ILMN_1214060	NM_183311.1	B930076A02			1.04203	0.159798	-1.08132	0.0450509	-1.05044	0.0796854		-1.07682	0.0712318	-1.17682	0.141019	-1.08606	0.111891
ILMN_1214065	NM_023718.2	Slco1a6	Slc21a13; AI790453; Oatp5; 4930422F19Rik; Oatp-5	Mus musculus solute carrier organic anion transporter family, member 1a6 (Slco1a6), mRNA.	-1.07685	0.0658735	-1.07728	0.0374168	-1.06019	0.043721		1.0129	0.0717717	-1.04122	0.0368635	1.00536	0.100704
ILMN_1214066	NM_153062.2	Slc37a1	MGC28167; G3PP	Mus musculus solute carrier family 37 (glycerol-3-phosphate transporter), member 1 (Slc37a1), mRNA.	1.56436	0.419703	2.04202	0.188868	3.87321	1.32019		1.20728	0.307783	2.203	0.226383	2.79619	0.441087
ILMN_1214070	NM_019705.3	Rbck1	HOIL-1; Ubce7ip3; UIP28; AL033326; RP23-452D3.5; HOIL-1L	Mus musculus RanBP-type and C3HC4-type zinc finger containing 1 (Rbck1), transcript variant 2, mRNA.	1.01538	0.152558	1.08402	0.111831	1.14887	0.106609		-1.04278	0.0637768	1.03228	0.070202	-1.08243	0.476078
ILMN_1214071	NM_026820.2	Ifitm1	1110036C17Rik; MGC107121; Mil2	Mus musculus interferon induced transmembrane protein 1 (Ifitm1), mRNA.	1.40202	0.284253	4.43945	0.521758	3.13326	0.23733		1.54602	2.05844	3.07572	1.29506	2.69503	0.609907
ILMN_1214072	XM_357282.1	LOC383833			1.04341	0.15996	-1.03613	0.0783663	1.05384	0.0180668		-1.0543	0.0317993	-1.00206	0.0481362	1.02813	0.0873381
ILMN_1214075	NM_026039.2	Med18	2810046C01Rik	Mus musculus mediator of RNA polymerase II transcription, subunit 18 homolog (yeast) (Med18), mRNA.	-1.06615	0.0876984	-1.03881	0.02854	1.00874	0.0711364		-1.01065	0.0921378	-1.02412	0.213269	-1.0799	0.121804
ILMN_1214082	NM_028352.3	Pgm3	C77933; BB187688; PAGM; Pgm-3; 2810473H05Rik	Mus musculus phosphoglucomutase 3 (Pgm3), mRNA.	-1.04073	0.0296301	-1.18721	0.142003	-1.08372	0.0904234		-1.10269	0.0238807	-1.09354	0.0802054	-1.17929	0.0494931
ILMN_1214088	AK045133	B130039D17Rik			-1.21752	0.0988982	-1.05881	0.126895	-1.22503	0.123336		1.10628	0.145829	-1.06013	0.117436	1.09644	0.442873
ILMN_1214090	NM_024439.3	H47	H-47; 1500011E07Rik; H-4; Vimp; C78786; H4; Sels	Mus musculus histocompatibility 47 (H47), mRNA.	-1.09133	0.016853	-1.10017	0.0527044	-1.15771	0.14331		-1.22102	0.0200306	-1.04009	0.122053	1.06313	0.26662
ILMN_1214091	AK036492	9830118G07Rik			-1.012	0.0140949	-1.2634	0.0195504	-1.03074	0.153232		-1.09408	0.0714803	-1.23074	0.0239804	-1.22998	0.0856656
ILMN_1214092	NM_172952.2	Gphn	GPHRYN; GPH; geph; C230040D23; AI662856; BC027112; 5730552E08Rik; MGC150066; MGC38765	Mus musculus gephyrin (Gphn), mRNA.	-1.09454	0.00816793	-1.61311	0.0619476	-1.90986	0.0761092		1.0451	0.27119	-1.5128	0.0781863	-1.62156	0.101531
ILMN_1214094	NM_206974.1	Kcnrg	E030012H22Rik; Gm745	Mus musculus potassium channel regulator (Kcnrg), transcript variant 2, mRNA.	-1.01188	0.132095	1.12349	0.0871333	1.12275	0.0813757		1.06029	0.159408	1.04444	0.178145	1.02531	0.128882
ILMN_1214101	XM_897011.2	Mast4		PREDICTED: Mus musculus microtubule associated serine/threonine kinase family member 4, transcript variant 5 (Mast4), mRNA.	1.04659	0.0828969	1.04753	0.153312	1.02033	0.133215		1.02932	0.0671688	-1.00296	0.0678793	-1.00832	0.0223933
ILMN_1214103	XR_034238.1	LOC244229		PREDICTED: Mus musculus similar to ribosomal protein S2 (LOC244229), misc RNA.	-1.08823	0.0938673	-1.08841	0.0172484	-1.00587	0.042493		-1.01079	0.0893764	-1.09443	0.065422	1.02532	0.0999737
ILMN_1214107	NM_001081423.1	Ttll5	2310009M18Rik; D630041K24Rik; mKIAA0998; 1700048H13Rik; STAMP; AI428864; R75373; 4930556H18Rik	Mus musculus tubulin tyrosine ligase-like family, member 5 (Ttll5), mRNA.	1.05281	0.167455	-1.0489	0.0548979	-1.01316	0.0460073		-1.06269	0.115057	1.00819	0.127173	-1.0002	0.0697052
ILMN_1214108	AK020437	9430024O13Rik			1.01313	0.100056	-1.05192	0.101647	1.04461	0.207262		-1.15611	0.0669275	-1.0636	0.00747721	-1.20125	0.0586066
ILMN_1214110	NM_021419.1	Rnf8	AIP37; 3830404E21Rik	Mus musculus ring finger protein 8 (Rnf8), mRNA.	-1.04566	0.0401118	-1.03339	0.080289	-1.14391	0.134202		1.03682	0.113085	-1.20314	0.0370926	-1.37247	0.160113
ILMN_1214111	XM_357148.1	LOC383602			-1.09613	0.0336984	-1.04069	0.119004	1.0672	0.142288		-1.0379	0.0585038	-1.09034	0.039738	-1.02911	0.112261
ILMN_1214113	NM_207262.2	Abpe	lacrimal	Mus musculus androgen binding protein epsilon (Abpe), mRNA.	-1.17873	0.0508914	-1.13856	0.0809097	-1.18962	0.11279		1.00522	0.110085	-1.01275	0.109412	1.00178	0.131204
ILMN_1214117	AK079264	9530065M15Rik			-1.22443	0.119821	-1.19911	0.117621	1.08761	0.139993		-1.08467	0.110764	-1.09022	0.0907133	1.009	0.0793406
ILMN_1214118	NM_031257.2	Plekha2	W91773; AI851530; TAPP2; AU041791; 6430512N22Rik	Mus musculus pleckstrin homology domain-containing, family A (phosphoinositide binding specific) member 2 (Plekha2), mRNA.	2.08483	0.425596	4.25261	0.749696	3.76292	0.278676		1.96846	1.66031	4.63801	0.31317	3.00912	1.54994
ILMN_1214119	NM_027104.2	2310002L09Rik	AV083437; 2310003M01Rik; MGC144294; MGC144293	Mus musculus RIKEN cDNA 2310002L09 gene (2310002L09Rik), mRNA.	-1.77987	0.124335	-1.69357	0.110667	-1.82493	0.329621		1.33603	0.272438	-1.06384	0.267449	1.01725	0.248585
ILMN_1214120	AK005166	1500005N04Rik			-1.11689	0.0733286	-1.29505	0.0606546	-1.14467	0.095058		1.00326	0.160365	-1.16711	0.148393	-1.3376	0.362536
ILMN_1214122	NM_019415	Slc12a3			-1.13733	0.0355804	-1.23632	0.143694	-1.22463	0.177992		-1.06909	0.12558	-1.0404	0.119998	1.0138	0.158821
ILMN_1214123	XM_924666.2	4932425I24Rik		PREDICTED: Mus musculus RIKEN cDNA 4932425I24 gene, transcript variant 4 (4932425I24Rik), mRNA.	1.07975	0.0739398	1.07716	0.159057	-1.05179	0.205235		1.03413	0.0794187	1.0159	0.086235	1.04179	0.118199
ILMN_1214125	XM_195404.2	LOC270366			-1.00411	0.0963983	-1.03399	0.0629093	-1.07211	0.06798		1.08447	0.12947	-1.12852	0.00700849	-1.02777	0.0411694
ILMN_1214126	NM_019479.2	Hes6	AI326893	Mus musculus hairy and enhancer of split 6 (Drosophila) (Hes6), mRNA.	1.21971	0.261324	-1.51894	0.169093	-2.16062	0.0312155		-1.19936	0.154594	-1.91955	0.0649318	-2.27497	0.136062
ILMN_1214127	AK028452	4631409F12Rik			-1.09666	0.106521	-1.07566	0.096313	-1.02096	0.17923		-1.03591	0.00663906	1.03436	0.0442867	1.09956	0.136763
ILMN_1214128	NM_016661	Ahcy			-1.01319	0.106826	-1.0554	0.14176	-1.14116	0.0963085		-1.01201	0.0199665	1.05231	0.0687317	-1.08264	0.113766
ILMN_1214132	NM_028106.2	Zbed3	2610005H11Rik; 0610037K01Rik; AU024588; AU018975	Mus musculus zinc finger, BED domain containing 3 (Zbed3), mRNA.	-1.06458	0.0447736	1.09601	0.0675452	1.12444	0.243866		1.07008	0.0983544	-1.04007	0.161144	1.08687	0.198338
ILMN_1214133	AK004357	Ftsj			-1.07544	0.0700622	-1.1307	0.0218108	-1.13846	0.0496752		-1.18243	0.136832	-1.24981	0.106191	-1.08095	0.0126
ILMN_1214136	XM_150180.1	2610005M20Rik			-1.06848	0.0537417	1.03999	0.161257	1.06646	0.053083		1.04235	0.096861	1.13134	0.111001	1.08023	0.0825316
ILMN_1214137	XM_124173.2	LOC229810			-1.05717	0.0647743	-1.03327	0.128476	-1.14297	0.0968356		-1.15701	0.189911	-1.13193	0.253966	-1.50501	0.108267
ILMN_1214139	AK013585	Fmn2			1.09107	0.0940246	1.00075	0.136719	-1.01553	0.0368919		1.0749	0.0865195	-1.02963	0.0488407	-1.06373	0.027092
ILMN_1214141	NM_025885.2	Med19	LCMR1; DKFZp586K0524; 2410018M14Rik	Mus musculus mediator of RNA polymerase II transcription, subunit 19 homolog (yeast) (Med19), mRNA.	1.26188	0.129512	1.18191	0.182436	-1.26585	0.325648		-1.20479	0.106445	-1.01583	0.158157	1.03065	0.0801189
ILMN_1214142	NM_198962.3	Hcrtr2	mOX2bR; mOXR2; OX2R; mOX2aR	Mus musculus hypocretin (orexin) receptor 2 (Hcrtr2), mRNA.	1.19314	0.0449411	-1.03723	0.083321	1.01153	0.0787816		-1.05104	0.124895	-1.11175	0.0624041	-1.19765	0.229014
ILMN_1214143	AK076727	Lyar			-1.17258	0.0335563	-1.10467	0.0265231	-1.11476	0.0576012		-1.17188	0.0762184	-1.18929	0.161554	-1.27496	0.139403
ILMN_1214144	XM_136059.4	4930513O06Rik		PREDICTED: Mus musculus RIKEN cDNA 4930513O06 gene (4930513O06Rik), mRNA.	-1.11806	0.121011	-1.06228	0.0970275	-1.08932	0.141354		1.021	0.104116	-1.10425	0.039481	-1.04249	0.097861
ILMN_1214146	NM_001083967.1	Tcf4	SEF2; ITF2; SEF-2; Tcf-4; ASP-I2; ITF-2; MITF-2B; Hnf-4; E2.2; TFE; ME2; ITF-2b; SEF2-1; MITF-2A; 5730422P05Rik; E2-2	Mus musculus transcription factor 4 (Tcf4), transcript variant 2, mRNA.	1.08627	0.0807355	1.1059	0.190802	1.0242	0.0358047		-1.08683	0.11274	-1.09726	0.0529011	-1.10922	0.153714
ILMN_1214150	NM_001038637.1	Gng2	82; 1110003P13Rik	Mus musculus guanine nucleotide binding protein (G protein), gamma 2 (Gng2), transcript variant 2, mRNA.	1.47647	0.175377	2.23492	0.800671	2.03936	0.123061		1.44857	0.40909	2.90088	0.42221	2.23494	0.333372
ILMN_1214157	AK080744	A930034J01Rik			-1.02375	0.058491	-1.11498	0.19129	-1.11074	0.0852994		1.00722	0.0626226	1.11173	0.0774145	1.01576	0.116928
ILMN_1214158	AK012987	2810404O06Rik			1.05519	0.0595373	1.04173	0.138353	1.01833	0.149881		1.12613	0.140913	1.19741	0.0705353	1.07993	0.192878
ILMN_1214163	NM_172772.2	B230380D07Rik	KIAA1164; mKIAA1164	Mus musculus RIKEN cDNA B230380D07 gene (B230380D07Rik), mRNA.	-1.03027	0.0863033	-2.22865	0.0807913	-2.25202	0.284058		-1.15003	0.23684	-2.14957	0.124624	-2.68567	0.0638423
ILMN_1214165	NM_031389.1	Nlrp4c	Nalp-alpha; Rnh2; Nalp4c	Mus musculus NLR family, pyrin domain containing 4C (Nlrp4c), mRNA.	1.11069	0.119964	-1.00119	0.087808	-1.04034	0.0657619		1.07069	0.11016	-1.00899	0.061826	-1.01891	0.0917645
ILMN_1214166	BC057001	Odf2			-1.01588	0.0198714	-1.01376	0.0273601	1.03138	0.0779598		-1.19643	0.129522	-1.03143	0.107364	-1.12414	0.162047
ILMN_1214167	NM_178377.4	Commd10	DRWMS2; 2310003A05Rik; AU019438	Mus musculus COMM domain containing 10 (Commd10), mRNA.	1.24253	0.0407077	1.52756	0.163131	1.71811	0.234436		1.41068	0.08394	1.61455	0.0741207	1.45756	0.218535
ILMN_1214169	XM_143170.2	LOC241942			-1.03082	0.0683895	-1.08495	0.149773	1.02961	0.0338547		1.00967	0.120801	-1.03108	0.0821043	1.09673	0.114729
ILMN_1214173	AK016205	4930563F16Rik			1.11331	0.0334617	1.00425	0.0799432	1.01092	0.107616		-1.06974	0.110448	-1.02797	0.087743	-1.00754	0.140355
ILMN_1214175	XM_136954.1	LOC237314			-1.02375	0.120529	1.04898	0.105728	-1.0589	0.0662428		-1.00666	0.0523579	-1.01997	0.0111049	-1.04306	0.164183
ILMN_1214178	XM_923363.2	D430007A19Rik		PREDICTED: Mus musculus RIKEN cDNA D430007A19 gene, transcript variant 3 (D430007A19Rik), mRNA.	1.10221	0.131048	-1.05134	0.0994021	-1.0276	0.0292705		1.00575	0.13217	-1.04812	0.131436	-1.055	0.0626466
ILMN_1214179	XM_001475248.1	LOC100045551		PREDICTED: Mus musculus similar to Protein phosphatase 1D magnesium-dependent, delta (LOC100045551), mRNA.	1.34289	0.0744446	1.43427	0.152906	1.40413	0.249779		1.23435	0.129945	1.46454	0.176019	1.13459	0.0313412
ILMN_1214180	NM_054044.1	Gpr124	mKIAA1531; Tem5; 8430414O08Rik; 9530074E10Rik	Mus musculus G protein-coupled receptor 124 (Gpr124), mRNA.	1.07144	0.368812	1.12859	0.66729	1.66598	0.780934		-1.08779	0.384839	1.60484	0.370345	1.35477	0.351549
ILMN_1214183	NM_178796.5	A530064D06Rik		Mus musculus RIKEN cDNA A530064D06 gene (A530064D06Rik), mRNA.	1.10744	0.0535015	1.04692	0.0731492	1.00531	0.114508		-1.0049	0.0851429	1.1002	0.164975	1.04439	0.129905
ILMN_1214184	AK051942	D230021J12Rik			1.09226	0.0689648	1.02069	0.0945968	-1.10864	0.292774		1.06691	0.166597	-1.01088	0.0861754	1.12281	0.0914765
ILMN_1214186	NM_019971	Pdgfc			1.07841	0.0644576	1.09212	0.0360315	1.04867	0.0813643		-1.02258	0.128664	1.1197	0.0415859	1.12115	0.0640086
ILMN_1214187	XR_034647.1	LOC668492		PREDICTED: Mus musculus similar to zinc finger CCHC-type and RNA binding motif 1 (LOC668492), misc RNA.	1.05488	0.16016	-1.06865	0.0840052	-1.16327	0.134046		-1.01286	0.127311	1.06479	0.137487	-1.05189	0.0735159
ILMN_1214188	NM_010075.1	Dpp6	In(5)6H-p; D5Buc3; Peplb; Dpp-6; D5Buc5; MGC113720; Rw; D5Buc4	Mus musculus dipeptidylpeptidase 6 (Dpp6), mRNA.	-1.03967	0.0802898	-1.07857	0.130853	1.02611	0.162448		1.01907	0.121621	-1.15526	0.0645082	1.03754	0.0752126
ILMN_1214189	NM_001081342.1	Gpr133	E230012M21Rik	Mus musculus G protein-coupled receptor 133 (Gpr133), mRNA.	1.08325	0.115008	1.0403	0.0784616	1.26278	0.11818		-1.00258	0.106654	-1.00181	0.140863	1.06082	0.229469
ILMN_1214190	NM_027881.2	Osbpl3	6720421I08Rik; ORP3; 1200014M06Rik; MGC102333; OSBP3; A530055M08	Mus musculus oxysterol binding protein-like 3 (Osbpl3), mRNA.	1.04023	0.0792307	1.05116	0.0673264	-1.07423	0.1136		-1.0262	0.121713	1.04058	0.067083	1.06196	0.1192
ILMN_1214191	XM_356722.1	LOC382874			1.05765	0.110325	-1.01935	0.0260267	-1.04385	0.0731934		1.04755	0.072111	-1.00966	0.0116445	1.04352	0.0912287
ILMN_1214193	AK084896	D430006M22Rik			-1.06871	0.0669926	-1.24511	0.145268	-1.25083	0.0987482		1.02644	0.209716	1.07242	0.220079	-1.02966	0.179496
ILMN_1214195	NM_001033372.2	Gm648		Mus musculus gene model 648, (NCBI) (Gm648), mRNA.	-1.06981	0.0757374	1.01096	0.0404626	-1.10836	0.0338417		-1.09485	0.0844972	-1.13231	0.159587	-1.09985	0.0777666
ILMN_1214199	AK032517	6430578G21Rik			-1.25116	0.0102209	-1.28788	0.0693229	-1.302	0.0713198		1.01638	0.196005	-1.01007	0.1849	-1.09282	0.21809
ILMN_1214208	XM_358063.1	LOC385114			-1.0029	0.102743	1.00183	0.0926945	-1.01009	0.115448		-1.01017	0.125035	-1.09573	0.117623	-1.12193	0.139314
ILMN_1214211	XM_001475521.1	LOC100040938		PREDICTED: Mus musculus hypothetical protein LOC100040938 (LOC100040938), mRNA.	-1.05357	0.0209862	-1.0336	0.0674935	-1.09933	0.154441		1.02657	0.0471809	1.03294	0.0528151	1.09021	0.310424
ILMN_1214213	NM_015754.2	Rbbp9	Bog	Mus musculus retinoblastoma binding protein 9 (Rbbp9), mRNA.	1.13335	0.045879	-1.22019	0.0617477	-1.614	0.0616573		1.07363	0.256424	-1.23469	0.157737	-1.11023	0.323788
ILMN_1214219	AK076297	4632427K15Rik			-1.00891	0.130498	-1.12266	0.168597	-1.04613	0.0500041		-1.04205	0.0550731	1.03125	0.0776449	-1.05094	0.109428
ILMN_1214222	NM_172536.1	Zfp609	BC016271; mKIAA0295; 9830165N24	Mus musculus zinc finger protein 609 (Zfp609), mRNA.	-1.08211	0.108726	-1.01712	0.119239	-1.07122	0.19217		1.00644	0.0413881	-1.06867	0.0867762	1.01562	0.0836557
ILMN_1214224	NM_001037665.2	Zfp1	mkr-1; Fnp-1; Zfp-1	Mus musculus zinc finger protein 1 (Zfp1), transcript variant 1, mRNA.	1.16264	0.147474	-1.09486	0.18743	-1.02971	0.0560443		1.10418	0.247154	1.11072	0.158908	-1.07244	0.124291
ILMN_1214228	NM_007540.4	Bdnf		Mus musculus brain derived neurotrophic factor (Bdnf), transcript variant 1, mRNA.	-1.07201	0.0928129	-1.00583	0.0324234	1.0208	0.0426744		1.12146	0.122704	1.10206	0.180367	1.10409	0.0122296
ILMN_1214233	XM_001003502.1	4930564C03Rik		PREDICTED: Mus musculus RIKEN cDNA 4930564C03 gene (4930564C03Rik), mRNA.	-1.00615	0.031684	-1.00857	0.0502916	-1.09448	0.0292407		-1.00433	0.0636451	-1.06479	0.0566172	-1.07362	0.0634241
ILMN_1214234	XM_358982.1	LOC385878			-1.06623	0.039539	-1.00298	0.0744777	-1.12961	0.0240351		-1.03202	0.0108847	-1.14876	0.0886126	-1.10676	0.0182934
ILMN_1214239	NM_001025373.1	4930432O21Rik		Mus musculus RIKEN cDNA 4930432O21 gene (4930432O21Rik), mRNA.	-1.07634	0.0953704	-1.35802	0.0468995	-1.63501	0.143268		1.06011	0.130666	-1.18456	0.158025	-1.14933	0.273832
ILMN_1214240	XM_203694.2	LOC277234			-1.05076	0.0281211	-1.11354	0.028515	-1.01173	0.0742234		1.01941	0.10449	1.02407	0.131745	-1.00593	0.0537887
ILMN_1214241	NM_013862.4	Rabgap1l	mKIAA0471; HHL; 5830411O09Rik; 8430421H08Rik; 9630005B12Rik; AW049894; Hh1	Mus musculus RAB GTPase activating protein 1-like (Rabgap1l), transcript variant 1, mRNA. XM_924767 XM_924771 XM_924774	-1.07958	0.0844628	-1.18177	0.151184	-1.14985	0.0425658		-1.06024	0.100825	1.02563	0.113398	-1.02199	0.174526
ILMN_1214251	AK080081	A530058H06Rik			1.10045	0.0502644	1.03514	0.0725224	1.096	0.00436685		-1.01086	0.00792882	-1.05728	0.0409413	1.0397	0.105832
ILMN_1214255	NM_010818.3	Cd200	Mox2; OX2	Mus musculus Cd200 antigen (Cd200), mRNA.	-1.05474	0.0888063	2.33228	0.650187	2.36354	0.116123		1.28663	0.84668	2.62954	0.416657	2.14276	0.361123
ILMN_1214257		1700048F04Rik			1.00646	0.0723677	-1.04303	0.0115663	-1.01774	0.0251011		1.05586	0.0549468	-1.10031	0.0556075	1.0696	0.0911298
ILMN_1214259	XM_356058.1	LOC381998			1.13946	0.0247787	1.13901	0.116944	1.00892	0.150746		-1.01923	0.22112	-1.08567	0.20886	1.09821	0.112555
ILMN_1214267	XM_356991.1	LOC383335			1.03548	0.125261	1.02801	0.196521	-1.04064	0.0803872		-1.00301	0.0384151	-1.08674	0.0645146	-1.00229	0.0864821
ILMN_1214275	NM_001004364.2	Ddef2	Gm1523; MGC90837; Gm592	Mus musculus development and differentiation enhancing factor 2 (Ddef2), transcript variant 2, mRNA.	1.08539	0.0136751	-1.05611	0.0963617	-1.04344	0.160387		-1.14803	0.0399502	-1.11781	0.0461596	-1.11671	0.0529325
ILMN_1214277	NM_009070.2	Rnps1		Mus musculus ribonucleic acid binding protein S1 (Rnps1), transcript variant 1, mRNA.	-1.1103	0.0868042	-1.15264	0.143459	-1.15139	0.0928777		1.02573	0.168535	1.01249	0.128254	-1.00353	0.165685
ILMN_1214286	NM_001081119.1	Abhd13	AI788994; 1110065L07Rik; AI463703	Mus musculus abhydrolase domain containing 13 (Abhd13), mRNA.	-1.0458	0.115917	-1.09708	0.0394529	-1.25783	0.0369469		-1.23101	0.0398175	-1.1401	0.128625	-1.05475	0.197168
ILMN_1214287		2610036E23Rik			-1.07579	0.0851475	-1.06808	0.116502	-1.1541	0.0684354		1.12245	0.169413	-1.19972	0.0704622	-1.09904	0.0580378
ILMN_1214288	AK087972	E430001K23Rik			-1.13079	0.173816	1.63726	0.114587	1.67409	0.222996		1.01123	0.377047	1.48287	0.17226	1.31683	0.23615
ILMN_1214290		2210008N01Rik			-1.10995	0.0924936	-1.01576	0.149945	1.02168	0.099195		-1.20803	0.131363	-1.2229	0.113149	-1.22873	0.176595
ILMN_1214294	NM_028964.3	Snx29		Mus musculus sorting nexin 29 (Snx29), mRNA.	-1.06417	0.102	-1.17932	0.0983628	-1.30374	0.113657		-1.0275	0.1825	-1.08159	0.106304	-1.09162	0.127235
ILMN_1214296	NM_053142.3	Pcdhb17	Pcdhb16; mKIAA1621; PcdhbQ	Mus musculus protocadherin beta 17 (Pcdhb17), mRNA.	-1.06009	0.0533489	1.10122	0.19006	-1.03909	0.203117		1.0839	0.120855	-1.0468	0.22902	1.15605	0.0542838
ILMN_1214297	XM_357174.1	LOC383657			1.16173	0.180238	1.13819	0.217761	1.19956	0.226859		-1.07086	0.0521077	-1.00362	0.0749884	-1.03132	0.0154972
ILMN_1214305	XR_031459.1	LOC100045250		PREDICTED: Mus musculus hypothetical protein LOC100045250 (LOC100045250), misc RNA.	-1.11878	0.131891	-1.01354	0.0435306	-1.04031	0.135261		1.01115	0.0965322	-1.03299	0.065113	-1.01511	0.161099
ILMN_1214307	NM_001033158.1	Rasl12	4631404I11Rik	Mus musculus RAS-like, family 12 (Rasl12), mRNA.	1.13832	0.149031	1.05228	0.0869695	1.03812	0.0543949		1.10304	0.0560204	1.05074	0.0952511	1.02008	0.0170649
ILMN_1214312	AK081244	C030024F02Rik			-1.0178	0.0398544	-1.01565	0.0333471	-1.11523	0.0654897		-1.04739	0.0129822	-1.08003	0.133062	-1.01869	0.0316977
ILMN_1214318	NM_011246.2	Rasgrp1	Rasgrp	Mus musculus RAS guanyl releasing protein 1 (Rasgrp1), mRNA.	1.39075	0.256857	1.32762	0.225214	1.15938	0.197859		1.32732	0.280537	1.73901	0.401745	1.17214	0.0791975
ILMN_1214319	NM_026053.1	Gemin6	2810470M17Rik; 2610019B15Rik	Mus musculus gem (nuclear organelle) associated protein 6 (Gemin6), mRNA.	1.09482	0.129045	1.19586	0.12113	-1.0278	0.107975		1.23702	0.179571	1.41715	0.295626	1.20429	0.256494
ILMN_1214322	AK083237	C630030D09Rik			-1.05716	0.114453	1.07414	0.0111896	1.05847	0.0449068		1.07332	0.160886	1.06961	0.0656474	1.06543	0.0285818
ILMN_1214326	NM_010065.1	Dnm			-1.04151	0.0909666	-1.00585	0.138584	-1.14728	0.188318		-1.01166	0.0933474	-1.06121	0.0951835	-1.0831	0.100203
ILMN_1214332	AK053895	E130318P21Rik			1.0517	0.138493	-1.03854	0.0547398	1.0539	0.0838491		1.0043	0.0623291	1.03091	0.0665462	1.03941	0.109357
ILMN_1214335	XR_033995.1	EG666160		PREDICTED: Mus musculus predicted gene, EG666160 (EG666160), misc RNA.	-1.04255	0.10716	-1.02864	0.0256877	-1.07201	0.150506		1.02501	0.0427945	-1.06844	0.102107	-1.00425	0.145328
ILMN_1214337	XM_359114.1	LOC386196			-1.02103	0.0562706	-1.09908	0.0446458	-1.02118	0.100441		-1.11271	0.0852984	-1.10983	0.0490526	-1.20419	0.123583
ILMN_1214350	XM_285102.2	LOC332042			-1.03084	0.113171	-1.17702	0.0672726	-1.22502	0.155941		-1.02645	0.0429558	-1.03024	0.0713634	1.10927	0.188479
ILMN_1214353	NM_013562.1	Ifrd1	Ifnl; PC4; Tis7	Mus musculus interferon-related developmental regulator 1 (Ifrd1), mRNA.	1.16289	0.0846209	1.06598	0.0982397	1.29298	0.335576		-1.06069	0.0808979	1.05046	0.170189	1.08493	0.178874
ILMN_1214355	AK030693	5530400C07Rik			1.03236	0.0953095	-1.02469	0.142557	1.01942	0.0511819		-1.03645	0.0393839	-1.17881	0.00642907	-1.11385	0.232414
ILMN_1214356	AK032307	6430518D03Rik			-1.15653	0.0951337	-1.17241	0.0842392	-1.22932	0.171133		1.12702	0.166371	-1.05578	0.116572	-1.00981	0.0616324
ILMN_1214358	NM_026270.3	Akt1s1	Lobel; PRAS40; AI227026; Lobe; 1110012J22Rik	Mus musculus AKT1 substrate 1 (proline-rich) (Akt1s1), mRNA.	-1.14677	0.114116	-1.09366	0.16311	-1.11518	0.157768		-1.09187	0.0948219	-1.29311	0.0677984	-1.23879	0.328625
ILMN_1214364	NM_178666.5	E430004N04Rik	A430108D01; BB160712	Mus musculus RIKEN cDNA E430004N04 gene (E430004N04Rik), mRNA.	1.0893	0.17092	1.12596	0.0717624	1.10186	0.0608477		1.01262	0.0451642	1.04001	0.0347222	1.01708	0.146896
ILMN_1214366	NM_177202.2	A930104D05Rik			1.01164	0.112908	-1.05068	0.12227	-1.00458	0.0320374		1.06956	0.0335005	-1.10509	0.0818588	1.00526	0.0640458
ILMN_1214368	XR_035177.1	AB041803		PREDICTED: Mus musculus cDNA sequence AB041803 (AB041803), misc RNA.	1.04461	0.0717562	-1.10189	0.111406	-1.11894	0.114532		1.01684	0.116609	1.06105	0.237933	-1.0046	0.084483
ILMN_1214369	NM_010902.3	Nfe2l2	Nrf2; AI194320	Mus musculus nuclear factor, erythroid derived 2, like 2 (Nfe2l2), mRNA.	1.09175	0.232661	-1.02575	0.120381	-1.00612	0.0414636		-1.09413	0.0684726	-1.11506	0.0598313	-1.1909	0.160931
ILMN_1214375	NM_133884.1	Atpbd1b	R74630; AI838661	Mus musculus ATP binding domain 1 family, member B (Atpbd1b), mRNA.	1.00773	0.173074	1.19683	0.120818	1.34757	0.410492		-1.13012	0.316222	1.05682	0.368106	1.09563	0.213177
ILMN_1214378	XM_918052.2	Thumpd2		PREDICTED: Mus musculus THUMP domain containing 2, transcript variant 6 (Thumpd2), mRNA.	1.02461	0.0620702	1.00173	0.102266	1.00268	0.149455		1.01989	0.0503422	1.06035	0.0947514	-1.05879	0.0813584
ILMN_1214386	XM_356590.1	LOC382602			1.00465	0.0681188	1.09009	0.174475	-1.00087	0.174842		-1.05925	0.114425	-1.23445	0.188868	-1.17256	0.0683208
ILMN_1214388	AK035377	9530027E17Rik			-1.17421	0.12601	-1.19579	0.0532685	-1.17472	0.0889855		-1.04778	0.0453973	-1.16652	0.0968542	-1.02278	0.0897653
ILMN_1214389	NM_001085499.1	Gm595	RP23-114B24.1	Mus musculus gene model 595, (NCBI) (Gm595), mRNA.	-1.10235	0.189437	-1.07756	0.0231547	-1.07561	0.224014		1.04213	0.0781335	-1.06764	0.0500077	1.06507	0.0802749
ILMN_1214391	NM_175106.3	Tmem177	2300008B03Rik	Mus musculus transmembrane protein 177 (Tmem177), mRNA.	-1.06149	0.12876	-1.07065	0.0817032	-1.11896	0.0653952		1.058	0.139924	-1.06057	0.182402	-1.05957	0.0142077
ILMN_1214394	NM_175836.2	Spnb2	AL033301; elf1; mKIAA4049; Spnb-2; elf3; SPTB2; SPTBN1; KIAA4049; 9930031C03Rik	Mus musculus spectrin beta 2 (Spnb2), transcript variant 1, mRNA.	1.2022	0.194638	1.6601	0.219257	1.34018	0.313501		1.16125	0.194042	1.53027	0.101554	1.35251	0.220255
ILMN_1214396	XM_904332.3	LOC630729		PREDICTED: Mus musculus similar to glutathione reductase 1 (LOC630729), mRNA.	-1.05688	0.328679	-1.10744	0.287525	1.01545	0.49239		-1.05078	0.269016	-1.04638	0.318731	-1.14515	0.183986
ILMN_1214401	NM_024460.3	2310016E02Rik		Mus musculus RIKEN cDNA 2310016E02 gene (2310016E02Rik), mRNA.	1.12363	0.104571	1.72073	0.392194	1.77347	0.0748796		1.16437	0.385184	2.07644	0.134759	1.68776	0.184743
ILMN_1214402	NM_029361.2	Wnk2	ESTM15; AW122246; 1810073P09Rik; X83337; mKIAA1760	Mus musculus WNK lysine deficient protein kinase 2 (Wnk2), mRNA.	-1.00732	0.0328467	-1.11071	0.0163944	1.03695	0.0480372		-1.03712	0.02052	-1.1632	0.0881468	-1.09198	0.0854199
ILMN_1214404	AK010756	2410098H20Rik			1.13541	0.0597356	1.10261	0.236179	1.12792	0.19023		-1.11578	0.155075	-1.11361	0.174429	-1.23673	0.159592
ILMN_1214405	NM_177751.2	Cnksr2	Cnk2; C030004A01; Ksr2; mKIAA0902	Mus musculus connector enhancer of kinase suppressor of Ras 2 (Cnksr2), mRNA.	1.01804	0.054506	-1.02349	0.10662	1.01852	0.00169247		-1.131	0.0514385	-1.1016	0.0568158	-1.1067	0.0606035
ILMN_1214408	XR_034389.1	LOC666403		PREDICTED: Mus musculus similar to ribosomal protein S2 (LOC666403), misc RNA.	-1.17004	0.0599743	-1.04688	0.0461514	1.07805	0.0805099		-1.10022	0.068545	-1.06265	0.0413202	-1.05998	0.143259
ILMN_1214410	NM_029809.1	2310014L17Rik	C77118; AV237412	Mus musculus RIKEN cDNA 2310014L17 gene (2310014L17Rik), mRNA.	-1.02757	0.146157	-1.05115	0.128631	1.14592	0.0969808		1.01629	0.110825	1.05256	0.0250436	1.15532	0.135121
ILMN_1214412	NM_133738.1	Antxr2	CMG-2; 2310046B19Rik; AW561899; cI-35; CMG2	Mus musculus anthrax toxin receptor 2 (Antxr2), mRNA.	1.16327	0.122325	1.41178	0.105666	1.38791	0.307339		1.08586	0.286996	1.04351	0.35908	-1.06381	0.191439
ILMN_1214416	NM_009281.3	Zfp143	Zfp79; Staf; pHZ-1; D7Ertd805e; AA959806; KRAB14; SBF; Zfp80-rs1; AU015869	Mus musculus zinc finger protein 143 (Zfp143), mRNA.	-1.07312	0.0132577	1.03446	0.165324	1.07956	0.244132		-1.03439	0.0426529	1.04111	0.0919698	-1.03324	0.185969
ILMN_1214419	NM_021274	Cxcl10			-1.02224	0.124388	-1.07579	0.163776	-1.05044	0.0528873		1.16428	0.149025	1.13366	0.089243	-1.02146	0.0390892
ILMN_1214422	NM_198619.2	2810408P10Rik		Mus musculus RIKEN cDNA 2810408P10 gene (2810408P10Rik), mRNA.	1.16222	0.307323	1.08324	0.0279978	-1.1098	0.0885159		-1.11846	0.19006	-1.16001	0.208079	-1.19377	0.0669332
ILMN_1214423	XM_356013.1	LOC381977			1.07992	0.0467503	1.01171	0.0913218	-1.08544	0.102852		-1.03016	0.0438821	1.01252	0.0906791	1.06649	0.0368813
ILMN_1214431	NM_016766.2	Mcrs1	ICP22BP; P78; MSP58; C78274; MGC117915; MGC103140	Mus musculus microspherule protein 1 (Mcrs1), mRNA.	1.09048	0.0975652	-1.0307	0.0998055	1.06016	0.154325		-1.11362	0.0425803	-1.09227	0.068736	-1.18449	0.135939
ILMN_1214433	XM_357671.1	LOC384491			-1.09192	0.0210405	1.04499	0.0854791	-1.01334	0.0504586		1.03336	0.0838418	-1.04838	0.106424	-1.04082	0.0223356
ILMN_1214437	XM_357678.1	LOC384504			-1.04684	0.0927306	-1.1283	0.107482	-1.12801	0.176892		1.15388	0.0971441	1.09991	0.136571	1.12252	0.0717034
ILMN_1214438	XM_205466.2	LOC214377			1.01495	0.138075	1.00675	0.170573	-1.00985	0.110808		-1.12106	0.0248578	-1.16527	0.0260713	-1.0314	0.054641
ILMN_1214439	AK054512	Ltbp1			1.03132	0.130664	1.0099	0.0988893	1.03324	0.0152828		-1.02035	0.0854453	-1.06776	0.0731072	-1.08472	0.209212
ILMN_1214441	NM_175352.4	Unc119b	AI414892; AA407659	Mus musculus unc-119 homolog B (C. elegans) (Unc119b), mRNA.	-1.05369	0.0498145	1.23217	0.220761	1.26221	0.221909		-1.02998	0.221794	1.04269	0.0937937	-1.06298	0.30211
ILMN_1214443	XM_290007.2	LOC333756			-1.10196	0.162876	-1.12869	0.123552	-1.0493	0.115161		-1.15787	0.0297391	-1.09838	0.0592234	-1.11344	0.094934
ILMN_1214447	NM_030265.3	Kcnip4	Calp250; KChIP4; AV032399; Calp	Mus musculus Kv channel interacting protein 4 (Kcnip4), mRNA.	-1.08012	0.081975	-1.10156	0.0839841	-1.09043	0.139906		-1.03573	0.0330241	1.07875	0.128308	1.10966	0.171514
ILMN_1214448	NM_001039720.1	9030619P08Rik		Mus musculus RIKEN cDNA 9030619P08 gene (9030619P08Rik), mRNA.	1.14661	0.698946	-3.05074	0.0288692	-4.14234	0.109765		-1.36586	0.309335	-3.74724	0.0193498	-3.18735	0.119597
ILMN_1214450	NM_001081054.2	Qrsl1	2700038P16Rik; C80053; GatA	Mus musculus glutaminyl-tRNA synthase (glutamine-hydrolyzing)-like 1 (Qrsl1), mRNA.	1.34659	0.0546054	1.31394	0.173557	1.00995	0.208386		1.0675	0.222316	1.06187	0.184703	1.03171	0.156363
ILMN_1214455	XM_134745.2	C330001K17Rik			-1.08117	0.137666	-1.44712	0.142478	-1.63375	0.0410315		-1.27472	0.118647	-2.06798	0.113091	-1.82553	0.134049
ILMN_1214459	NM_016880.1	Krt35	Krtha5; Krt1-24; Ha5; AI662400	Mus musculus keratin 35 (Krt35), mRNA.	-1.09677	0.0504211	-1.05236	0.0941811	-1.06736	0.163537		1.03486	0.0805395	-1.08368	0.065737	1.04836	0.02057
ILMN_1214464	AK033731	Serpinb6			-1.09449	0.0337489	-1.13082	0.00937886	-1.10889	0.0620173		-1.11903	0.0976661	-1.10277	0.170714	-1.24432	0.0936525
ILMN_1214465	AK017103	Pigm			1.06921	0.0415872	1.23784	0.194747	1.11866	0.091562		1.01502	0.109762	1.27593	0.0477352	1.14827	0.189578
ILMN_1214466	AK029932	4932408C11Rik			-1.01088	0.0700428	1.00495	0.0750584	1.05367	0.0203471		1.01106	0.138259	1.04609	0.122537	1.03533	0.0435291
ILMN_1214468	XM_133219.7	Nkpd1		PREDICTED: Mus musculus NTPase, KAP family P-loop domain containing 1 (Nkpd1), mRNA.	1.01867	0.0992294	-1.09865	0.13553	-1.12634	0.0870504		1.00213	0.0996686	1.1406	0.156394	1.01258	0.138306
ILMN_1214469	XM_916892.2	Slc38a6		PREDICTED: Mus musculus solute carrier family 38, member 6 (Slc38a6), mRNA.	1.11231	0.139016	1.11761	0.118317	-1.20276	0.0643441		1.0007	0.0714134	1.02252	0.0477924	-1.00967	0.18537
ILMN_1214470	NM_001038991.1	Ids	AW214631	Mus musculus iduronate 2-sulfatase (Ids), transcript variant 3, mRNA.	1.01535	0.0887002	-1.08928	0.0475109	1.009	0.0874165		-1.05897	0.083524	-1.0121	0.121661	1.09649	0.0987097
ILMN_1214471	NM_176919	Ppm1h			1.15194	0.132631	1.05531	0.142005	1.05145	0.112073		-1.088	0.139795	-1.10902	0.0861062	-1.06085	0.157687
ILMN_1214473	XM_916034.3	Dmrtb1		PREDICTED: Mus musculus DMRT-like family B with proline-rich C-terminal, 1 (Dmrtb1), mRNA.	1.06805	0.184436	1.00632	0.0818973	1.0894	0.0910256		-1.09034	0.0716048	1.0029	0.18192	-1.06539	0.295413
ILMN_1214474	XM_132396.8	Rimbp2		PREDICTED: Mus musculus RIMS binding protein 2, transcript variant 1 (Rimbp2), mRNA.	-1.10022	0.112507	-1.0539	0.135189	-1.03348	0.0737138		-1.14651	0.060528	-1.24306	0.0649627	-1.0947	0.102953
ILMN_1214477	AK031098	5930404K09Rik			-1.0447	0.0521525	-1.04905	0.0613087	-1.01095	0.110402		1.07559	0.0717925	1.02968	0.14154	-1.03766	0.0404518
ILMN_1214478	AK030642	5330440O04Rik			-1.03219	0.0732688	-1.0241	0.152767	-1.15659	0.0712881		1.0281	0.0925604	-1.09923	0.0552951	-1.04077	0.0459765
ILMN_1214482	NM_175381.5	2700081O15Rik	AI848741; AW742297; AI255177	Mus musculus RIKEN cDNA 2700081O15 gene (2700081O15Rik), mRNA.	-1.03058	0.11513	1.02726	0.118677	1.04444	0.0118454		1.14002	0.0686761	-1.04536	0.155016	-1.06153	0.111265
ILMN_1214483	NM_007759.2	Crabp2	Crabp-2; AI893628; CrabpII	Mus musculus cellular retinoic acid binding protein II (Crabp2), mRNA.	-1.04184	0.075972	1.09093	0.0994674	1.14004	0.046506		1.11284	0.0397838	1.01127	0.123887	1.00044	0.247242
ILMN_1214485	XM_127250	E2f3			1.05192	0.154609	1.05468	0.0541849	1.11705	0.186759		-1.21586	0.126653	-1.00496	0.0299985	-1.07447	0.0879007
ILMN_1214486	NM_021028.2	Tk2	AU024611	Mus musculus thymidine kinase 2, mitochondrial (Tk2), nuclear gene encoding mitochondrial protein, mRNA.	1.10069	0.0784222	-1.06801	0.0722442	1.17894	0.135537		-1.13971	0.032631	-1.19481	0.0807946	-1.10962	0.228218
ILMN_1214487	NM_172473.2	Hace1	A730034A22Rik; mKIAA1320; KIAA1320; BC025474; 1700042J16Rik	Mus musculus HECT domain and ankyrin repeat containing, E3 ubiquitin protein ligase 1 (Hace1), mRNA.	1.05417	0.05396	1.16168	0.262752	1.17465	0.13959		1.20793	0.3372	1.46145	0.0322489	1.37884	0.396334
ILMN_1214488	NM_018858.2	Pebp1	MGC102065; Pbpr; Pbp1; Pbp; HCNP; MGC103131	Mus musculus phosphatidylethanolamine binding protein 1 (Pebp1), mRNA.	-1.0277	0.11851	-1.56106	0.146526	-1.5708	0.138414		-1.42944	0.0939316	-1.73504	0.083486	-1.65788	0.129242
ILMN_1214492	XR_032950.1	EG634762		PREDICTED: Mus musculus predicted gene, EG634762 (EG634762), misc RNA.	1.09373	0.245223	1.04381	0.0832442	1.0437	0.116596		1.00854	0.103589	-1.13118	0.195151	-1.10087	0.0713233
ILMN_1214498	NM_019823.3	Cyp2d22	2D22	Mus musculus cytochrome P450, family 2, subfamily d, polypeptide 22 (Cyp2d22), mRNA.	-1.34516	0.125425	-1.92031	0.132817	-1.77813	0.0757914		-1.14971	0.315589	-1.92948	0.116532	-1.59653	0.0117163
ILMN_1214500	NM_177740.4	Rgma	MGC38550; MGC69915; C230063O06; BC059072	Mus musculus RGM domain family, member A (Rgma), mRNA.	-1.08349	0.0525102	1.031	0.0811121	1.07569	0.137596		1.13946	0.0789273	1.02426	0.0789261	1.19134	0.0537977
ILMN_1214501	AK017036	MOR, GPCR			-1.18878	0.0481074	-1.09307	0.0414427	-1.1926	0.0848494		-1.07942	0.0938437	-1.13465	0.0692571	-1.06487	0.052562
ILMN_1214503	AK076451	Nsg1			-1.02719	0.123754	-1.00343	0.176584	-1.06996	0.0829839		1.03847	0.0426866	-1.05236	0.0812225	-1.03868	0.0892296
ILMN_1214504	NM_177002.3	C730048C13Rik	UST1R	Mus musculus RIKEN cDNA C730048C13 gene (C730048C13Rik), mRNA.	-1.1712	0.1054	-1.61214	0.0304908	-1.67609	0.0635137		-1.13141	0.179454	-1.57583	0.0243225	-1.63787	0.0119873
ILMN_1214505	NM_009370.2	Tgfbr1	Alk-5; TbetaRI; ALK5; TbetaR-I; AU017191	Mus musculus transforming growth factor, beta receptor I (Tgfbr1), mRNA.	1.02969	0.138307	-1.00006	0.0758793	-1.07289	0.121979		-1.01575	0.0768802	-1.04753	0.0293944	-1.08105	0.142633
ILMN_1214508	NM_146486.1	Olfr203	MOR182-5; MGC157633	Mus musculus olfactory receptor 203 (Olfr203), mRNA.	1.10138	0.126983	1.04038	0.0781663	-1.01917	0.172704		1.01527	0.147797	-1.03739	0.0145916	1.02858	0.0976016
ILMN_1214511	NM_012016.2	Ern2	MGC124363; Ire1; Ern1; MGC124364; Ire1b	Mus musculus endoplasmic reticulum (ER) to nucleus signalling 2 (Ern2), mRNA.	-1.08169	0.0683263	-1.01911	0.220176	-1.07435	0.120351		1.07352	0.110658	1.10233	0.0692397	1.05143	0.0454454
ILMN_1214514	NM_144808.4	Slc39a14	BC021530; Zip14; MGC38539; G630015O18Rik; fad123	Mus musculus solute carrier family 39 (zinc transporter), member 14 (Slc39a14), mRNA.	1.08497	0.239508	2.11019	0.375663	2.05108	0.279045		-1.01608	0.599968	1.77066	0.213606	1.90038	0.0879073
ILMN_1214515	NM_019729.2	Usp8	AI574262; mKIAA0055; AW557536; Ubpy	Mus musculus ubiquitin specific peptidase 8 (Usp8), mRNA.	1.1633	0.0284002	-1.10688	0.174152	-1.30096	0.127595		-1.20232	0.0639036	-1.50553	0.057725	-1.53064	0.0399848
ILMN_1214517	NM_183254.1	1700025K23Rik		Mus musculus RIKEN cDNA 1700025K23 gene (1700025K23Rik), mRNA.	1.10371	0.04271	-1.12467	0.118098	1.02904	0.0838262		1.05955	0.133003	1.08082	0.17132	1.13799	0.225784
ILMN_1214518	NM_181749.1	Gpr142	PGR2	Mus musculus G protein-coupled receptor 142 (Gpr142), mRNA.	-1.03656	0.0789291	-1.14778	0.0558499	-1.0231	0.0741221		1.00346	0.0816008	-1.004	0.102107	1.02438	0.0871094
ILMN_1214520	AK016508	Atp8a2			-1.05014	0.0648946	-1.02291	0.0686516	-1.06471	0.043139		-1.01723	0.0392877	-1.05731	0.138331	-1.02742	0.0666048
ILMN_1214521	XR_032986.1	LOC623453		PREDICTED: Mus musculus similar to proteolipid protein 2 (LOC623453), misc RNA.	1.01291	0.0951151	2.15278	0.0585139	2.31207	0.43969		-1.02847	0.866927	1.86343	0.573237	1.37527	1.22457
ILMN_1214523	AK078688	Mms19l			-1.06153	0.194952	-1.12404	0.0508979	1.03454	0.167567		1.02452	0.15737	-1.0354	0.0676871	-1.13027	0.0813022
ILMN_1214525	XR_031743.1	LOC633371		PREDICTED: Mus musculus similar to cadherin protein (LOC633371), misc RNA.	-1.15842	0.0824527	-1.04013	0.0785876	1.0776	0.0882		1.06155	0.101246	-1.09823	0.0460745	-1.02188	0.125192
ILMN_1214531	NM_007813.1	Cyp2b13		Mus musculus cytochrome P450, family 2, subfamily b, polypeptide 13 (Cyp2b13), mRNA.	-2.12292	0.192665	-14.838	0.0533515	-29.2069	0.00891772		-1.26795	0.447838	-262.693	0.0169494	-253.163	0.0663247
ILMN_1214537	XM_488895	B530002L08			-1.17066	0.0811673	-1.10281	0.01172	-1.00876	0.0960615		1.02514	0.0521951	-1.01747	0.057122	-1.02243	0.0962311
ILMN_1214541	NM_207025.1	Tas2r123	mt2r55; mGR23; Tas2r23; t2r55; T2R23; STC 9-2	Mus musculus taste receptor, type 2, member 123 (Tas2r123), mRNA.	1.05291	0.0443723	-1.01582	0.125652	1.07825	0.070485		-1.05685	0.126802	-1.14256	0.148292	-1.11058	0.242492
ILMN_1214543	XM_893628.1	LOC628836		PREDICTED: Mus musculus similar to Glycine cleavage system H protein, mitochondrial precursor (LOC628836), mRNA.	-1.14589	0.0358021	-1.6232	0.103764	-1.35898	0.118503		-1.12002	0.252498	-1.72801	0.0773207	-1.71723	0.0893021
ILMN_1214544	NM_009277.2	Trim21			-1.03881	0.147672	-1.04904	0.0647788	-1.05421	0.0701167		-1.0674	0.0518426	-1.03681	0.0942518	1.05972	0.142271
ILMN_1214548	NM_133996.3	Apon	D10Ucla2; AI195275; MGC37850	Mus musculus apolipoprotein N (Apon), mRNA.	1.09805	0.355725	1.03445	0.394159	1.07785	0.343327		-1.04581	0.436026	-1.41094	0.381036	1.05727	0.0983382
ILMN_1214550	NM_177654.2	BC034902			-1.13448	0.0494425	-1.14754	0.0126479	-1.00891	0.0818436		-1.04454	0.0835591	-1.06954	0.0771252	1.0366	0.0294456
ILMN_1214560	AK047692	Asah2			-1.19445	0.132158	-1.23812	0.158561	-1.27067	0.0840785		-1.08733	0.159979	-1.167	0.0958066	-1.16911	0.0666359
ILMN_1214561	NM_001013025.2	Tgfbrap1	AU024090; Trap1; AU042859; AW742551; 3110018K12Rik	Mus musculus transforming growth factor, beta receptor associated protein 1 (Tgfbrap1), mRNA.	1.06586	0.0565227	1.04753	0.218004	1.06595	0.0415094		-1.0917	0.137271	-1.31047	0.16035	-1.20323	0.324213
ILMN_1214562	AK016678	4933405P16Rik			-1.09379	0.115319	-1.16226	0.19352	-1.18358	0.0517275		1.02003	0.102515	1.11908	0.145402	1.05966	0.229691
ILMN_1214563	NM_175132.3	Synpo2l	1110054M18Rik	Mus musculus synaptopodin 2-like (Synpo2l), mRNA.	-1.10947	0.131868	-1.09267	0.0418858	-1.19546	0.12635		-1.09323	0.0578772	-1.02908	0.110951	-1.02117	0.104179
ILMN_1214565	AK049236	C330015L04Rik			1.00716	0.135879	-1.04087	0.221922	-1.03494	0.087397		1.0655	0.0809852	1.18466	0.0793014	1.10844	0.096337
ILMN_1214566	AK052669	D630018J02Rik			1.10169	0.0651755	1.10921	0.0743208	1.0289	0.0594466		1.09241	0.068725	1.21116	0.105901	1.10044	0.0749421
ILMN_1214570		4930482J15Rik			1.05268	0.0747365	1.00369	0.132032	-1.03425	0.0588531		1.02438	0.101799	-1.12136	0.0271529	-1.09168	0.100146
ILMN_1214571	NM_153098.2	Cd109	9930012E15Rik; GARP; AI480638	Mus musculus CD109 antigen (Cd109), mRNA.	-1.10498	0.053609	1.03554	0.113226	-1.0785	0.0231275		-1.07622	0.194794	-1.07247	0.148911	-1.04909	0.0712608
ILMN_1214572	AK087868	E330033J05Rik			-1.07067	0.0937177	-1.04908	0.0735464	1.00217	0.0730005		1.00473	0.0826237	-1.07021	0.0677126	-1.0234	0.0639491
ILMN_1214573	AK035910	Aspa			-1.51409	0.131062	-1.92434	0.055331	-2.52631	0.108244		-1.28747	0.222782	-1.58231	0.170531	-1.66947	0.169396
ILMN_1214574	NM_027979.1	Chit1	2300002L19Rik	Mus musculus chitinase 1 (chitotriosidase) (Chit1), mRNA.	-1.11493	0.0999926	-1.04337	0.102983	1.0867	0.0641282		1.1046	0.0939558	1.10164	0.136144	1.06078	0.095924
ILMN_1214578	NM_173863.2	Crtc3	MGC19083; TORC3; BC011210; 2610312F20Rik; AI429792; 6332415K15Rik	Mus musculus CREB regulated transcription coactivator 3 (Crtc3), mRNA.	1.12651	0.143378	1.66126	0.108323	1.90635	0.129462		-1.03823	0.693026	1.36381	0.453968	1.56978	0.595227
ILMN_1214580	XM_358973.1	LOC385854			1.01316	0.073954	-1.14767	0.146175	-1.0556	0.101971		1.18645	0.21724	1.11603	0.229068	1.05294	0.121224
ILMN_1214585	NM_007997.1	Fdxr		Mus musculus ferredoxin reductase (Fdxr), nuclear gene encoding mitochondrial protein, mRNA.	1.0885	0.169262	1.00193	0.140906	1.08651	0.122255		-1.14536	0.173845	-1.37806	0.243521	-1.18358	0.219739
ILMN_1214586	NM_175513.3	Zfp804a	RP23-121B24.1; C630007C17Rik	Mus musculus zinc finger protein 804A (Zfp804a), mRNA.	1.04569	0.127621	-1.03351	0.121267	-1.06528	0.0846082		1.0916	0.0944986	-1.00773	0.0742904	-1.03098	0.068349
ILMN_1214593	NM_029629.1	Fahd2a	Cgi-105; B430104H02Rik; 1500003K14Rik	Mus musculus fumarylacetoacetate hydrolase domain containing 2A (Fahd2a), mRNA.	-1.32852	0.162497	-1.80827	0.12864	-1.84198	0.0172437		-1.22576	0.222895	-2.40319	0.0551307	-1.94227	0.131843
ILMN_1214597	XM_001472427.1	LOC100039120		PREDICTED: Mus musculus similar to Xlr-related, meiosis regulated, transcript variant 1 (LOC100039120), mRNA.	1.02348	0.0948701	1.05374	0.178645	-1.03658	0.0415542		-1.12323	0.0924893	-1.186	0.132263	-1.11445	0.0544862
ILMN_1214602	NM_009144.1	Sfrp2	Sdf5; AI851596	Mus musculus secreted frizzled-related protein 2 (Sfrp2), mRNA.	1.01446	0.131059	-1.05069	0.0218746	-1.12263	0.0794319		1.00725	0.071166	-1.05583	0.0653518	1.0155	0.129836
ILMN_1214608	NM_026376.3	Plxnd1	6230425C21Rik	Mus musculus plexin D1 (Plxnd1), mRNA.	-1.02374	0.0796914	2.0977	0.672949	1.75152	0.488847		1.32866	0.499197	3.00237	0.569766	2.29589	0.340986
ILMN_1214609	NM_019648.3	Metap2	AU014659; Amp2; AI047573; Mnpep; A930035J23Rik; p67eIF2; MGC102452; AL024412; p67	Mus musculus methionine aminopeptidase 2 (Metap2), mRNA.	1.10653	0.104436	-1.01138	0.0478018	1.01375	0.116077		-1.05675	0.00800443	-1.03304	0.0824844	1.03175	0.0443806
ILMN_1214617	XM_984204.1	Plxna4		PREDICTED: Mus musculus plexin A4, transcript variant 2 (Plxna4), mRNA.	-1.04399	0.106282	-1.0356	0.110138	1.04504	0.0984489		-1.02425	0.0682597	1.09505	0.0669114	1.12157	0.117937
ILMN_1214620	AK085367	D630016P04Rik			-1.00355	0.107719	1.14517	0.0716477	1.02304	0.164593		1.00318	0.251744	1.10783	0.171879	1.05894	0.0519061
ILMN_1214624	XM_984432.1	4930548F15Rik		PREDICTED: Mus musculus RIKEN cDNA 4930548F15 gene (4930548F15Rik), mRNA.	-1.11642	0.0579428	-1.09231	0.138968	-1.11819	0.15667		-1.05491	0.0873736	-1.21	0.0532599	-1.05523	0.179787
ILMN_1214631	NM_133770.1	Adck4			-1.09824	0.183403	1.30354	0.163822	1.67008	0.148264		-1.15348	0.367574	1.15558	0.299081	1.27372	0.408077
ILMN_1214634	NM_022026.2	Aqp9	AI266899	Mus musculus aquaporin 9 (Aqp9), mRNA.	-1.22597	0.238495	-1.19013	0.192372	-1.35012	0.140433		-1.0829	0.153718	-1.44371	0.185361	-1.17057	0.155886
ILMN_1214635		D0H6S2654E			-1.01042	0.153212	-1.12715	0.0985934	1.05296	0.18579		-1.08458	0.075935	-1.11684	0.0465867	-1.21579	0.224419
ILMN_1214645	NM_054096.1	Tirap	C130027E04Rik; Tlr4ap; AA407980; wyatt; Mal	Mus musculus toll-interleukin 1 receptor (TIR) domain-containing adaptor protein (Tirap), mRNA.	-1.09627	0.306442	-1.12547	0.0376665	-1.04729	0.328566		-1.05606	0.137507	-1.1938	0.172263	-1.02461	0.201078
ILMN_1214647	NM_172674.2	Phf20	6820402O20Rik	Mus musculus PHD finger protein 20 (Phf20), mRNA. XM_902658 XM_921032 XM_921093 XM_977098 XM_980964 XM_981001 XM_981043 XM_981080 XM_981121 XM_981157	1.02605	0.0805115	1.21222	0.199869	-1.0531	0.179914		1.01744	0.0648362	1.3567	0.0999021	1.27575	0.240968
ILMN_1214648	AK081245	C030024L24Rik			-1.20154	0.101908	-1.28576	0.0893787	-1.08017	0.135221		-1.14715	0.0523935	-1.19985	0.0814967	-1.13398	0.213143
ILMN_1214650	AK012612.1	scl0002368.1_75			-1.00767	0.213248	1.04678	0.111945	1.11813	0.306243		1.11387	0.239531	1.23734	0.233688	-1.20584	0.141361
ILMN_1214658	XM_001002189.1	Zfp383		PREDICTED: Mus musculus zinc finger protein 383, transcript variant 3 (Zfp383), mRNA.	1.00709	0.190189	-1.02214	0.0748081	-1.10546	0.102497		-1.01708	0.0903219	-1.08293	0.0231193	-1.0554	0.103895
ILMN_1214659	XM_001472244.1	EG633692		PREDICTED: Mus musculus predicted gene, EG633692 (EG633692), mRNA.	1.05693	0.132224	1.20582	0.089345	1.13508	0.227479		1.15926	0.346894	1.46066	0.334962	1.1174	0.219494
ILMN_1214661	NM_010980.1	Olfr32	MOR227-9_p; MOR227-7P; MTPCR05	Mus musculus olfactory receptor 32 (Olfr32), mRNA.	-1.10328	0.120006	-1.12339	0.031286	-1.13687	0.0911846		-1.01655	0.109932	-1.06142	0.112364	-1.08997	0.149173
ILMN_1214662	AK087406	E130008J19Rik			1.01074	0.102498	-1.09469	0.0366012	-1.02508	0.0274319		-1.12815	0.0221891	1.00244	0.110585	-1.08095	0.0559405
ILMN_1214664	NM_001038592.1	Glrx2	1700010P22Rik; AI645710; Grx2	Mus musculus glutaredoxin 2 (thioltransferase) (Glrx2), transcript variant 1, mRNA.	-1.22233	0.232363	-1.68329	0.230846	-1.3356	0.23128		-1.28044	0.150619	-1.40066	0.0383626	-1.22644	0.25245
ILMN_1214668	AK031365	Msi2h			1.13056	0.0762188	1.1916	0.0924458	1.45689	0.212113		-1.04336	0.195159	1.13391	0.202404	-1.01732	0.401837
ILMN_1214671	NM_028023.3	Cdca4	SEI-3; 2410018C03Rik; HEPP	Mus musculus cell division cycle associated 4 (Cdca4), mRNA.	1.26449	0.272669	2.56446	0.694972	2.93881	0.109612		1.49859	0.843006	3.06143	0.183107	2.00057	1.20553
ILMN_1214672	AK053800	2310079F23Rik			-1.05442	0.127051	-1.0776	0.0947251	1.08302	0.173859		1.03884	0.0540807	-1.08727	0.0547627	-1.0881	0.201204
ILMN_1214678	NM_001081191.1	Eml5	BC027154; C130068M19Rik	Mus musculus echinoderm microtubule associated protein like 5 (Eml5), mRNA.	1.00187	0.0156749	-1.08602	0.0493777	-1.063	0.125609		1.05202	0.135254	-1.02073	0.136075	1.05384	0.00890601
ILMN_1214679	AK080668	Ap3m2			1.07251	0.102579	1.07927	0.0763387	1.02452	0.102099		1.12562	0.119889	1.00767	0.0476864	1.09583	0.0596502
ILMN_1214681	NM_145218.3	Wbscr17	AA388321; E330012B09Rik	Mus musculus Williams-Beuren syndrome chromosome region 17 homolog (human) (Wbscr17), mRNA.	1.03525	0.0592795	1.01777	0.138373	-1.01573	0.0439046		-1.18925	0.0612152	-1.16651	0.0422219	-1.0788	0.0883239
ILMN_1214686	XM_980330.1	Scn2a1		PREDICTED: Mus musculus sodium channel, voltage-gated, type II, alpha 1 (Scn2a1), mRNA.	1.05789	0.0639571	1.08531	0.138966	1.09711	0.02203		-1.00203	0.081239	1.02859	0.116778	-1.01136	0.111262
ILMN_1214693	AK050478	Nnt			-1.01974	0.0874181	1.0323	0.0688267	-1.04234	0.150672		-1.12317	0.0791131	-1.16712	0.136909	-1.2679	0.139503
ILMN_1214695	AK049518	C430018M18Rik			1.10365	0.108734	1.14624	0.104759	-1.01993	0.204232		1.12292	0.0497185	1.03467	0.0869767	1.09498	0.041957
ILMN_1214700	NM_175460.3	Nmnat2	PNAT2; PNAT1; MGC113818; AI843915; D030041I09Rik	Mus musculus nicotinamide nucleotide adenylyltransferase 2 (Nmnat2), mRNA.	-1.03964	0.125912	-1.06416	0.0123234	-1.03164	0.145723		1.07717	0.128583	1.01797	0.0778411	-1.00839	0.0552562
ILMN_1214701	AK042751	Sema6a			-1.21324	0.0578858	-1.14432	0.0904959	-1.29132	0.0278837		-1.1081	0.0943859	-1.11505	0.163394	-1.06641	0.246466
ILMN_1214703	NM_138314.2	Nme7	Nm23-M7; D530024H21Rik; Nm23-r7	Mus musculus non-metastatic cells 7, protein expressed in (nucleoside-diphosphate kinase) (Nme7), transcript variant 1, mRNA.	-1.20086	0.45439	-1.84447	0.29774	-1.61389	0.421721		-1.11095	0.214095	-1.11131	0.112965	1.09294	0.771807
ILMN_1214705	AK015349	Ppp1r2			-1.10897	0.159609	-1.1015	0.00461768	-1.23663	0.185184		-1.00307	0.0698419	-1.09232	0.0432895	1.03625	0.114143
ILMN_1214706	AK049453	C430014G13Rik			-1.13287	0.0707135	-1.18171	0.0726923	-1.0998	0.124028		-1.08262	0.157895	1.03035	0.274095	-1.04242	0.320902
ILMN_1214708	NM_024436.3	Rab22a	Rab22; AW319644; 3732413A17Rik; E130120E14Rik; AW550514; AI662177	Mus musculus RAB22A, member RAS oncogene family (Rab22a), mRNA.	1.02549	0.0706225	-1.07127	0.0287557	-1.02532	0.0343354		1.0313	0.101677	-1.06537	0.0542715	-1.02282	0.0574796
ILMN_1214712	AK041221	A530092L01Rik			-1.04978	0.0744923	-1.06426	0.0311315	-1.06629	0.0891048		-1.05669	0.121539	-1.13731	0.0955956	-1.15764	0.0751609
ILMN_1214713	NM_054048.3	Rcor2	CoREST; AW122124; Rcor1; Rcor; 1A13	Mus musculus REST corepressor 2 (Rcor2), mRNA.	-1.11969	0.00809987	-1.08661	0.0433176	-1.14474	0.106907		-1.15815	0.196332	-1.1482	0.0369069	-1.13779	0.100831
ILMN_1214715	NM_010277.2	Gfap	AI836096	Mus musculus glial fibrillary acidic protein (Gfap), mRNA.	1.023	0.135277	-1.00245	0.0809543	-1.02622	0.012519		1.01116	0.0883099	-1.05708	0.0568333	1.01197	0.0450416
ILMN_1214719	NM_033521.3	Laptm4b	C330023P13Rik; LAPTM4beta	Mus musculus lysosomal-associated protein transmembrane 4B (Laptm4b), mRNA.	-1.07876	0.0638444	-1.23853	0.0333645	-1.08347	0.00572997		-1.03359	0.109633	-1.08574	0.0632509	-1.07599	0.028035
ILMN_1214722	XM_484529.5	EG433003		PREDICTED: Mus musculus predicted gene, EG433003 (EG433003), mRNA.	-1.18283	0.170185	-1.27554	0.0644754	-1.06012	0.168849		-1.32415	0.0664121	-1.21886	0.0699495	-1.11174	0.131368
ILMN_1214726	AK039375	Pafah1b3			1.09246	0.0604899	1.03696	0.0729127	-1.0042	0.0469807		-1.08578	0.116203	-1.1189	0.151244	-1.11572	0.104066
ILMN_1214731	XM_001471649.1	LOC100044190		PREDICTED: Mus musculus hypothetical protein LOC100044190 (LOC100044190), mRNA.	2.04325	0.386247	1.44654	0.0773812	1.35598	0.188031		1.17291	0.143251	1.0844	0.235696	-1.00776	0.738719
ILMN_1214734	NM_023598.2	Arid5b	Mrf2; Mrf2alpha; AI467247; 4930580B11; Mrf2beta; Desrt; 5430435G07Rik	Mus musculus AT rich interactive domain 5B (Mrf1 like) (Arid5b), mRNA.	1.0034	0.0703256	1.04401	0.0559554	1.00054	0.0456649		1.01708	0.082455	-1.06006	0.141787	1.05445	0.0600122
ILMN_1214737		2600009P04Rik			-1.01206	0.0119215	-1.02172	0.103334	1.01723	0.105404		1.06332	0.143375	-1.01384	0.0981978	-1.15531	0.19621
ILMN_1214738	NM_029949.3	Snapc3	1810020H02Rik; E030018J20Rik; 5031401C21Rik; AI414457; 4930558A07Rik	Mus musculus small nuclear RNA activating complex, polypeptide 3 (Snapc3), mRNA.	1.06097	0.0934345	1.57184	0.257604	1.34197	0.302042		1.01172	0.431199	1.16428	0.336159	1.07527	0.0537831
ILMN_1214740	XM_132830.8	Rpusd3		PREDICTED: Mus musculus RNA pseudouridylate synthase domain containing 3, transcript variant 1 (Rpusd3), mRNA.	1.07582	0.11819	-1.16869	0.16169	-1.11912	0.0971089		-1.25308	0.0349502	-1.38834	0.053976	-1.32464	0.166141
ILMN_1214745	XM_358042.1	LOC385084			-1.00293	0.0414177	1.0418	0.0450781	-1.0176	0.113867		-1.05622	0.0660083	1.08549	0.129112	-1.00133	0.0535068
ILMN_1214747	XM_355633.1	LOC381668			1.0501	0.100195	1.00259	0.110522	-1.03526	0.0744749		-1.01809	0.0424801	-1.11187	0.00846729	1.03426	0.0145117
ILMN_1214750	NM_027552.1	Kynu	4432411A05Rik	Mus musculus kynureninase (L-kynurenine hydrolase) (Kynu), mRNA.	-1.08005	0.241356	-1.50864	0.17023	-1.97917	0.0753923		-1.04595	0.242756	-1.68847	0.0528023	-1.33398	0.27322
ILMN_1214753	NM_026626.2	Efcab2	D830011E08Rik; 1700073K01Rik	Mus musculus EF-hand calcium binding domain 2 (Efcab2), mRNA.	1.00002	0.0192987	-1.27371	0.052138	-1.30189	0.115667		-1.10113	0.120664	-1.08753	0.133013	-1.02735	0.148318
ILMN_1214761	AK032486	Mapk8			1.08577	0.0332633	1.12569	0.124047	1.08315	0.21181		1.01095	0.169144	-1.03868	0.0246564	-1.17159	0.0187246
ILMN_1214762	NM_177547.3	Sgk3	A330005P07Rik; 2510015P22Rik; Cisk	Mus musculus serum/glucocorticoid regulated kinase 3 (Sgk3), transcript variant 2, mRNA.	1.04104	0.13971	1.25983	0.319786	-1.1481	0.130406		1.35431	0.261672	1.60952	0.285506	1.30376	0.478416
ILMN_1214765	NM_011273.2	Xpr1	Rmc-1; Syg1; Sxv; XR; Rmc1	Mus musculus xenotropic and polytropic retrovirus receptor 1 (Xpr1), mRNA.	-1.07196	0.105308	1.30561	0.217123	-1.18437	0.0599325		1.06179	0.218778	1.14443	0.108786	1.24412	0.468693
ILMN_1214767	AK035363	Tulp3			-1.00058	0.104819	1.04981	0.108478	-1.09758	0.119801		-1.0618	0.0640645	-1.08728	0.0597626	-1.03937	0.119479
ILMN_1214768	XM_001480162.1	Fer1l3		PREDICTED: Mus musculus fer-1-like 3, myoferlin (C. elegans), transcript variant 1 (Fer1l3), mRNA.	-1.02128	0.106156	1.10968	0.0580753	1.06298	0.0576013		1.0045	0.0644006	1.08938	0.0506845	-1.01265	0.194608
ILMN_1214771	AK044604	A930026H04Rik			1.00388	0.0408928	1.05728	0.181837	1.00591	0.0910884		1.15511	0.0589064	-1.12584	0.0864685	-1.07554	0.0797997
ILMN_1214775	AK030497	5330421K23Rik			1.06995	0.152049	1.01582	0.0461523	1.05307	0.133642		-1.08032	0.0713177	-1.07171	0.114049	-1.18481	0.14956
ILMN_1214782	NM_011050.3	Pdcd4	MA-3; D19Ucla1; TIS	Mus musculus programmed cell death 4 (Pdcd4), mRNA.	1.10093	0.358356	-1.36757	0.237853	1.0736	0.638338		1.04919	0.282784	-1.0074	0.243347	1.07374	0.30661
ILMN_1214783	AK040949	A530050E01Rik			1.00047	0.14341	1.27416	0.0849772	1.31528	0.204593		-1.15018	0.139037	1.19777	0.102764	1.05622	0.209175
ILMN_1214785	XM_356465.1	LOC382365			-1.05696	0.138243	-1.11516	0.0683452	-1.14621	0.0525504		-1.04318	0.0458145	-1.08826	0.0597498	-1.09995	0.0793909
ILMN_1214788	NM_001081392.1	Mdn1	A130070M06; 4833432B22Rik; AA958993; Gm135	Mus musculus midasin homolog (yeast) (Mdn1), mRNA.	-1.0123	0.0227746	1.02358	0.0703011	-1.00484	0.0127652		-1.05273	0.053192	1.00578	0.0363593	-1.09387	0.0866724
ILMN_1214790	NM_027732.1	Dmrtc2	Dmrt7; 4933432E21Rik	Mus musculus doublesex and mab-3 related transcription factor like family C2 (Dmrtc2), mRNA.	-1.06732	0.0739183	1.01757	0.245555	1.01866	0.111272		-1.03365	0.0122789	-1.21205	0.0728335	-1.16453	0.167691
ILMN_1214793	NM_025536.2	Commd5	Hcarg; AI854466; 2310065H03Rik; D15Ertd81e	Mus musculus COMM domain containing 5 (Commd5), mRNA.	-1.007	0.173366	1.21671	0.161289	1.26442	0.0584783		-1.22978	0.234104	-1.02992	0.162232	1.10939	0.242091
ILMN_1214795	AK044848	B130007O15Rik			1.07354	0.0552999	1.1506	0.107657	1.01748	0.191182		1.02316	0.174741	-1.01014	0.0845504	1.14036	0.0343896
ILMN_1214800	NM_027445.1	Rnf167	AU019305; 5730408C10Rik; AV328608; RP23-326P7.8; 0610010G05Rik	Mus musculus ring finger protein 167 (Rnf167), mRNA.	-1.22057	0.142137	-1.52652	0.120763	-1.29701	0.0680227		1.16406	0.307846	-1.62917	0.0935401	-1.62936	0.296842
ILMN_1214802	NM_025731.2	Hrasls5	1700086E08Rik; 4921526K24Rik; 1700055A14Rik	Mus musculus HRAS-like suppressor family, member 5 (Hrasls5), mRNA.	-1.25627	0.0307147	-1.12177	0.141673	-1.15687	0.0999418		1.06739	0.04665	-1.02803	0.0534179	-1.08782	0.0507999
ILMN_1214803	NM_001039061.1	Klhl15	6330500C13Rik; MGC47138	Mus musculus kelch-like 15 (Drosophila) (Klhl15), transcript variant 1, mRNA.	-1.11919	0.0929938	1.07909	0.11541	1.1125	0.114235		1.02507	0.0942439	-1.06859	0.113659	-1.01557	0.0916907
ILMN_1214806	XM_001475233.1	4932438A13Rik		PREDICTED: Mus musculus RIKEN cDNA 4932438A13 gene (4932438A13Rik), mRNA.	1.03895	0.273667	1.09928	0.0951562	-1.0826	0.371986		-1.0182	0.135175	1.01803	0.140594	1.03003	0.422721
ILMN_1214810	NM_007477.4	Arf2		Mus musculus ADP-ribosylation factor 2 (Arf2), mRNA.	1.37761	0.023515	2.23396	0.162836	1.60315	0.0885431		1.20638	0.604237	2.05129	0.436792	1.66863	0.0913786
ILMN_1214811	NM_008943.1	Psen1			1.17915	0.0681893	1.52315	0.190149	1.38286	0.131251		1.07885	0.293775	1.23479	0.218374	1.02818	0.603054
ILMN_1214816		IGHV1S37_M13789_Ig_heavy_variable_1S37_136			-1.08295	0.0324223	-1.07674	0.0456379	-1.14751	0.0797926		1.03403	0.104286	-1.02892	0.0762016	-1.0514	0.0914883
ILMN_1214817	NR_003293.2	D030028A08Rik		Mus musculus RIKEN cDNA D030028A08 gene (D030028A08Rik) on chromosome 11.	-1.04702	0.121221	1.1803	0.177318	1.02872	0.1266		1.0014	0.132247	-1.0292	0.13155	1.13397	0.058804
ILMN_1214822	NM_013529.2	Gfpt2	GFAT2; AI480523	Mus musculus glutamine fructose-6-phosphate transaminase 2 (Gfpt2), mRNA.	1.14587	0.0959001	3.6589	0.977707	3.41645	0.323715		-1.02025	2.02119	4.18699	0.421739	2.39809	1.41761
ILMN_1214823	NM_011647.2	Tsc2	Tcs2	Mus musculus tuberous sclerosis 2 (Tsc2), transcript variant 1, mRNA.	-1.24248	0.0932694	-1.64447	0.03011	-1.42378	0.0378942		-1.117	0.18771	-1.49207	0.0867418	-1.60792	0.297523
ILMN_1214825	XM_355538.1	LOC381578			-1.08861	0.192987	1.04935	0.27884	1.20769	0.41732		-1.13009	0.193407	1.12051	0.161761	1.00404	0.222868
ILMN_1214826	XR_032424.1	Pgbd1		PREDICTED: Mus musculus piggyBac transposable element derived 1 (Pgbd1), misc RNA.	1.24074	0.188764	-1.07624	0.099024	-1.08438	0.224776		1.09256	0.0426373	1.14113	0.112069	1.15433	0.17816
ILMN_1214828	AK005477	1600017E01Rik			1.10124	0.0740576	1.08582	0.0490455	1.14384	0.201623		1.08565	0.0751602	1.00859	0.0973526	-1.00964	0.111721
ILMN_1214829	NM_146811.1	Olfr910	MOR165-3	Mus musculus olfactory receptor 910 (Olfr910), mRNA.	-1.00637	0.0658693	-1.06191	0.0895833	-1.11494	0.054311		-1.01727	0.0498556	-1.05837	0.0833071	-1.14262	0.0296873
ILMN_1214830	AK011342	Atp5k			-1.21354	0.194167	-1.0089	0.110978	-1.05979	0.211317		-1.34835	0.225573	-1.19422	0.127179	-1.25721	0.064731
ILMN_1214831	XM_357385.1	LOC384046			1.10073	0.261159	-1.34717	0.134295	-1.10465	0.0745041		-1.11765	0.157028	-1.06839	0.143596	-1.12193	0.059797
ILMN_1214832	AK034042	9330151E04Rik			-1.06808	0.00308459	-1.00644	0.149992	-1.0677	0.0686874		1.07712	0.0756996	-1.15639	0.115015	-1.11166	0.0946323
ILMN_1214835	AK036499	Cdc25a			1.00271	0.0662367	-1.05772	0.0524874	1.07499	0.271662		-1.05649	0.0286241	-1.18232	0.149437	-1.2242	0.080182
ILMN_1214838	NM_153193.2	Hsd3b2		Mus musculus hydroxy-delta-5-steroid dehydrogenase, 3 beta- and steroid delta-isomerase 2 (Hsd3b2), mRNA.	-1.14624	0.162212	-2.02032	0.0961042	-2.90291	0.0893943		-1.13393	0.360314	-1.74872	0.222156	-1.90218	0.111154
ILMN_1214839	NM_001037744.1	Timm8a2	MGC117751	Mus musculus translocase of inner mitochondrial membrane 8 homolog a2 (yeast) (Timm8a2), nuclear gene encoding mitochondrial protein, mRNA.	-1.14432	0.106171	-1.18067	0.0390087	-1.13232	0.0781379		1.04335	0.109472	-1.02698	0.100236	1.01638	0.0370044
ILMN_1214840	XM_356781.1	LOC382972			1.0226	0.0475473	1.05274	0.111646	-1.01952	0.0814953		1.01877	0.0807391	1.01982	0.092369	1.06529	0.0147277
ILMN_1214841	NM_053095.1	Il24	St16; Mda-7; FISP; Mda7	Mus musculus interleukin 24 (Il24), mRNA.	1.03968	0.104977	1.21494	0.137006	-1.10075	0.129221		-1.07975	0.178428	1.02542	0.127474	1.14572	0.124455
ILMN_1214842	XM_356880.1	LOC383109			1.18448	0.277143	-1.05555	0.15734	1.01536	0.0439493		-1.02825	0.0887261	-1.18045	0.0267048	-1.0532	0.0510938
ILMN_1214843	NM_025907.3	Mettl6	AI467521; AU020711; 1600013P15Rik	Mus musculus methyltransferase like 6 (Mettl6), mRNA.	1.04425	0.143742	-1.04105	0.0583115	1.071	0.13124		-1.19259	0.0429246	-1.21541	0.0846124	-1.13243	0.220599
ILMN_1214844	AK049000	C230090G04Rik			1.0871	0.0620684	-1.03223	0.0737457	-1.01262	0.0420797		1.01381	0.0845033	-1.09634	0.0498195	-1.04942	0.123792
ILMN_1214848	NM_001083341.1	Mboat2	Oact2; AW547221; AU022889; 2810049G06Rik; Moact2	Mus musculus membrane bound O-acyltransferase domain containing 2 (Mboat2), transcript variant 2, mRNA.	-1.21831	0.014278	-1.11998	0.135958	-1.16638	0.106681		1.01581	0.0559667	1.11594	0.173258	-1.07284	0.0597487
ILMN_1214850	NM_011035.2	Pak1	PAK-1; Paka; AW045634	Mus musculus p21 (CDKN1A)-activated kinase 1 (Pak1), mRNA.	1.1049	0.0947593	1.09378	0.126069	1.27751	0.104163		1.15291	0.107106	1.18129	0.121091	1.17706	0.174926
ILMN_1214855	AK085862	D830019K05Rik			1.01235	0.0743353	-1.0148	0.0322177	1.05574	0.0334986		-1.09866	0.0652244	1.01603	0.0690448	-1.03382	0.0971504
ILMN_1214856	XM_356640.1	LOC382720			-1.11162	0.0626738	-1.14946	0.0816908	1.02223	0.193089		1.03152	0.14558	-1.10428	0.059591	-1.09864	0.130549
ILMN_1214859	NM_173738.2	BC027344		Mus musculus cDNA sequence BC027344 (BC027344), mRNA.	-1.13352	0.107365	-1.06844	0.00938479	-1.11527	0.0752335		1.0634	0.010149	-1.07201	0.0821418	-1.08222	0.0331181
ILMN_1214863	AK052162	Cacna1c			-1.04442	0.0660886	-1.09224	0.0887764	-1.12652	0.222189		1.0589	0.0997772	-1.05343	0.0591597	-1.04003	0.0326664
ILMN_1214866	NM_001043335.1	Eml1	A930030P13Rik; AI847476; AI853955; ELP79; EMAPL; AA171013; 1110008N23Rik; EMAP; MGC158992	Mus musculus echinoderm microtubule associated protein like 1 (Eml1), transcript variant 1, mRNA. XM_901775 XM_901779 XM_978946 XM_978978 XM_979015 XM_979053 XM_979124 XM_979166 XM_979204	-1.09741	0.0695087	1.85317	0.420029	1.99112	0.167328		1.24406	0.602119	2.32003	0.0967902	1.80302	0.344531
ILMN_1214874	XM_359052.1	LOC386068			-1.01543	0.192252	-1.457	0.22358	-1.61188	0.1511		-1.35871	0.0960445	-1.04855	0.162059	-1.04658	0.26931
ILMN_1214875	AK052480	Rps24			1.03258	0.0449195	1.06859	0.232547	1.15091	0.0772899		-1.11005	0.120933	1.14432	0.184165	1.17816	0.276474
ILMN_1214877	XM_919537.2	A430107D22Rik		PREDICTED: Mus musculus RIKEN cDNA A430107D22 gene, transcript variant 5 (A430107D22Rik), mRNA.	-1.11648	0.147047	-1.39297	0.0484534	-1.2296	0.120695		-1.21798	0.0478129	-1.30518	0.164858	-1.25276	0.159608
ILMN_1214878	NM_027402.2	Fndc5	Pxp; MGC129465; C87088; PeP; MGC129464; 1500001L03Rik; AI836596	Mus musculus fibronectin type III domain containing 5 (Fndc5), mRNA.	-1.16538	0.0987393	-1.03345	0.366734	1.32962	0.317871		-1.00424	0.135716	1.42905	0.305206	1.23402	0.446289
ILMN_1214880	NM_183312.3	Dmn	E130104F11; Syn; AI852401; 4930412K21Rik; MGC56976; Synemin	Mus musculus desmuslin (Dmn), transcript variant 3, mRNA.	-1.83524	0.0462234	-1.54745	0.296635	-1.77806	0.266874		1.20891	0.272397	1.10702	0.277867	1.15265	0.453387
ILMN_1214887	NM_001001979.1	Megf10	3000002B06Rik; Gm331	Mus musculus multiple EGF-like-domains 10 (Megf10), mRNA.	-1.15735	0.0673829	-1.07869	0.017995	-1.13661	0.108687		-1.04963	0.0778341	-1.08644	0.0962827	1.05561	0.0436179
ILMN_1214888	NM_013701.1	Ugt1a2		Mus musculus UDP glucuronosyltransferase 1 family, polypeptide A2 (Ugt1a2), mRNA.	1.13876	0.0859697	-2.09002	0.208886	-1.57106	0.317467		1.04962	0.51808	-3.97895	0.0735604	-4.4331	0.1557
ILMN_1214893	XM_358894.1	LOC385669			1.00753	0.0905471	-1.0808	0.175377	-1.06349	0.0974265		-1.05271	0.0451221	-1.13273	0.0110956	-1.02361	0.0928556
ILMN_1214899	NM_153104.2	Phospho1	D11Moh36; Phospo1	Mus musculus phosphatase, orphan 1 (Phospho1), mRNA.	1.12739	0.230109	1.16081	0.240847	-1.00518	0.144495		1.06499	0.0421485	-1.19493	0.164456	-1.26618	0.240899
ILMN_1214900	XR_002486.1	LOC669365		PREDICTED: Mus musculus similar to K+ channel tetramerization protein (LOC669365), mRNA.	-1.07692	0.174619	-1.0117	0.158676	-1.10736	0.11484		1.05326	0.0217157	-1.03288	0.0430139	-1.05646	0.0767832
ILMN_1214902	XR_033930.1	EG666756		PREDICTED: Mus musculus predicted gene, EG666756 (EG666756), misc RNA.	1.07649	0.419828	1.40668	0.605241	1.72379	0.479573		1.00509	0.473003	1.82344	0.273736	1.63408	0.330705
ILMN_1214904	AK090017	G430060O14Rik			1.00162	0.0521033	-1.01032	0.0692357	-1.06272	0.0335269		-1.02697	0.0312084	-1.01364	0.0415857	1.05217	0.0888337
ILMN_1214907	NM_009288.1	Stk10			-1.01015	0.144763	-1.32239	0.0516938	-1.12925	0.0819082		-1.08142	0.131397	-1.29963	0.0392139	-1.37572	0.173242
ILMN_1214908	XM_146031.1	LOC233710			-1.0746	0.0669233	-1.04501	0.065318	-1.044	0.13277		1.0088	0.00546923	1.0403	0.0769972	1.1058	0.0836257
ILMN_1214909	XM_354764.1	LOC380859			1.00399	0.0945672	-1.2173	0.0579694	-1.11929	0.0372031		-1.14815	0.130531	-1.1782	0.0694616	-1.15697	0.0162048
ILMN_1214910	NM_001034871.1	Gm749		Mus musculus gene model 749, (NCBI) (Gm749), mRNA.	1.04876	0.0587547	-1.14036	0.0890277	-1.20716	0.162838		1.13619	0.221589	-1.07399	0.0446404	1.1469	0.237962
ILMN_1214911	NM_175397	5830484A20Rik			1.13139	0.134883	1.04143	0.0843151	-1.07999	0.077543		-1.00644	0.127989	1.07512	0.140074	1.00784	0.141311
ILMN_1214914	NM_026666.3	Ubn1	MGC102206; AW124741; 2610108L02Rik; 1110029L11Rik; AA673476	Mus musculus ubinuclein 1 (Ubn1), mRNA.	-1.15003	0.0463004	-1.27432	0.0898856	-1.24306	0.113315		-1.21538	0.0612489	-1.24333	0.0908233	-1.09704	0.0911681
ILMN_1214917	NM_028122.3	Slc14a1	2610507K20Rik; 3021401A05Rik; UT-B	Mus musculus solute carrier family 14 (urea transporter), member 1 (Slc14a1), mRNA.	1.08687	0.0476856	1.21486	0.347637	1.18776	0.0662213		1.06	0.04659	-1.07634	0.0735428	1.09443	0.330583
ILMN_1214918	XR_034790.1	LOC546015		PREDICTED: Mus musculus similar to ribosomal protein S9 (LOC546015), misc RNA.	-1.10626	0.672206	1.17813	0.802894	1.75097	1.2867		-1.15317	0.640687	1.44803	0.425293	1.42311	0.577343
ILMN_1214925	NM_146346.1	Olfr397	RP23-360H16.7; MOR135-28	Mus musculus olfactory receptor 397 (Olfr397), mRNA.	1.13426	0.155915	-1.05144	0.0739176	-1.00561	0.264348		1.13028	0.0253489	-1.03046	0.129863	1.05736	0.150637
ILMN_1214926	AK050786	D030019N20Rik			-1.04317	0.10316	-1.1965	0.241774	-1.0249	0.159239		-1.15975	0.0416652	1.0423	0.0706106	-1.16064	0.0274092
ILMN_1214934	NM_030248.1	Cdk5rap3	BC002318; HSF-27; MGC8303; C81486; MST016; IC53; C53; 1810007E24Rik	Mus musculus CDK5 regulatory subunit associated protein 3 (Cdk5rap3), mRNA.	-1.02044	0.046459	1.01041	0.160866	1.20641	0.0933391		-1.07212	0.0675795	-1.08621	0.0169637	1.06141	0.175454
ILMN_1214935	AK046833	B830020B14Rik			-1.08701	0.0213432	-1.03066	0.042296	-1.15789	0.0762873		-1.03628	0.0829565	-1.03432	0.193072	-1.07853	0.194842
ILMN_1214937	NM_010270.2	Mrps33	Gdap3; CGI-139; PTD003; AI841153; MRP-S33; MGC106490	Mus musculus mitochondrial ribosomal protein S33 (Mrps33), nuclear gene encoding mitochondrial protein, transcript variant 1, mRNA.	-1.04873	0.0140505	-1.24355	0.0630657	-1.37236	0.132572		1.08857	0.20708	-1.0802	0.135303	-1.1065	0.156674
ILMN_1214938	NM_176905.2	D330005C11Rik			-1.15347	0.0809905	-1.14043	0.0853775	-1.07335	0.183862		1.03988	0.104534	-1.04084	0.0526186	1.08856	0.0313562
ILMN_1214944	XM_131754.7	Aim1l		PREDICTED: Mus musculus absent in melanoma 1-like, transcript variant 1 (Aim1l), mRNA.	-1.21917	0.0781977	-1.24851	0.454663	-1.34531	0.453462		1.33467	0.232602	1.27037	0.197642	1.21653	0.235964
ILMN_1214945	NM_198649.2	Ablim3	MGC69876; D930036B08Rik; AW990719; KIAA0843	Mus musculus actin binding LIM protein family, member 3 (Ablim3), mRNA.	1.09635	0.0769866	1.06539	0.123886	1.07641	0.0531058		-1.25814	0.200917	-1.16728	0.175492	1.06301	0.05895
ILMN_1214947	XM_001471732.1	LOC100044210		PREDICTED: Mus musculus hypothetical protein LOC100044210 (LOC100044210), mRNA.	-1.03979	0.121241	-1.08878	0.0689755	-1.14604	0.148874		-1.18864	0.110695	-1.26429	0.1452	-1.08276	0.0871753
ILMN_1214950	NM_025282.2	Mef2c	AV011172; 5430401D19Rik; 9930028G15Rik	Mus musculus myocyte enhancer factor 2C (Mef2c), mRNA.	-2.11659	0.0364049	-1.64691	0.611933	-1.79868	0.308952		1.42168	0.275052	1.47015	0.503014	1.18137	0.341327
ILMN_1214951	NM_018740.1	Rai12		Mus musculus retinoic acid induced 12 (Rai12), mRNA.	1.02652	0.00351226	1.09186	0.0391731	1.04401	0.154749		-1.03476	0.114225	1.00985	0.100375	-1.02395	0.288515
ILMN_1214952	NM_009907.2	Cln3	AI323623	Mus musculus ceroid lipofuscinosis, neuronal 3, juvenile (Batten, Spielmeyer-Vogt disease) (Cln3), mRNA.	-1.02492	0.206459	1.20343	0.0182335	1.26273	0.0395311		-1.01389	0.164686	1.19748	0.0720336	1.00209	0.667772
ILMN_1214953	NM_199057.2	Rusc2	AI840675; mKIAA0375	Mus musculus RUN and SH3 domain containing 2 (Rusc2), transcript variant 1, mRNA.	-1.50578	0.0112108	-1.91104	0.0465538	-1.46631	0.0300513		-1.25168	0.206059	-1.63454	0.108494	-1.50587	0.0766703
ILMN_1214954	NM_023878.2	Cldn10	D14Ertd728e; 6720456I16Rik	Mus musculus claudin 10 (Cldn10), transcript variant 1, mRNA.	1.03229	0.108157	-1.09133	0.142288	-1.11641	0.140053		1.00723	0.120497	-1.06196	0.152678	1.09587	0.157576
ILMN_1214957	XM_908592.2	1700125H20Rik		PREDICTED: Mus musculus RIKEN cDNA 1700125H20 gene, transcript variant 3 (1700125H20Rik), mRNA.	-1.0874	0.0183985	-1.19423	0.0694963	-1.0833	0.127137		1.03408	0.158298	1.05409	0.186169	1.13248	0.107952
ILMN_1214964	NM_026764.2	Gstm4	MGC40906; Gstb-4; Gstb4; GSTM7-7; 1110004G14Rik	Mus musculus glutathione S-transferase, mu 4 (Gstm4), mRNA.	1.13016	0.0741023	-1.56229	0.203755	-1.73044	0.109393		1.04941	0.320782	-2.68974	0.0764757	-2.57809	0.312582
ILMN_1214965	NM_031169.3	Kcnmb1	BKbeta1	Mus musculus potassium large conductance calcium-activated channel, subfamily M, beta member 1 (Kcnmb1), mRNA.	1.14981	0.140025	1.16983	0.167332	1.06182	0.189248		1.19383	0.0446919	-1.02162	0.0602886	1.00426	0.145398
ILMN_1214966	NM_001004061.1	Gm93	Znfd	Mus musculus gene model 93, (NCBI) (Gm93), mRNA.	-1.06284	0.0604021	1.0188	0.1633	1.00531	0.163007		-1.02301	0.0752917	1.03805	0.0403429	1.03731	0.0565024
ILMN_1214971	AK052922	D830044I01Rik			-1.09272	0.0438241	-1.41946	0.0167773	-1.50325	0.0642792		-1.11498	0.22654	-1.39877	0.0676565	-1.25919	0.125448
ILMN_1214974	NM_010744.1	Il1rl1l			-1.29773	0.0784779	-1.40068	0.0811882	-1.26632	0.0950437		-1.02588	0.191338	1.00004	0.275549	-1.21945	0.118479
ILMN_1214975	NM_146137.2	Amigo1	RP23-89M15.6; ali2; A; Amigo; MGC25558	Mus musculus adhesion molecule with Ig like domain 1 (Amigo1), mRNA.	-1.1812	0.0835721	-1.17855	0.0631695	-1.05892	0.154263		-1.49456	0.234749	-1.34498	0.200138	-1.26993	0.15463
ILMN_1214976	NM_019578	Extl1			-1.16081	0.0654107	-1.13088	0.0536924	-1.1723	0.0876318		-1.05832	0.0702241	-1.08242	0.0608012	-1.04279	0.104654
ILMN_1214978	NM_027022.4	Cmtm2a	Cklfsf2-1b; Cklf1; Cklfsf2a; 1700041N15Rik; UCK-1; CKLF4; 1700063K20Rik; 1700001K04Rik; CKLF3; ARR19; C32; AI449770; Cklf; CKLF5	Mus musculus CKLF-like MARVEL transmembrane domain containing 2A (Cmtm2a), mRNA.	-1.02284	0.0884096	1.05241	0.203729	-1.15386	0.109412		1.02053	0.0179148	-1.11517	0.078833	-1.03162	0.102734
ILMN_1214985	XR_035134.1	4930579G22Rik		PREDICTED: Mus musculus RIKEN cDNA 4930579G22 gene (4930579G22Rik), misc RNA.	-1.10781	0.0659531	1.00534	0.168154	-1.09821	0.207123		1.03294	0.100059	-1.08791	0.120897	1.07367	0.0886101
ILMN_1214991	NM_153545.1	Lrrc45	MGC30595; BC023296	Mus musculus leucine rich repeat containing 45 (Lrrc45), mRNA.	-1.00726	0.11499	1.05547	0.266131	1.08846	0.0853416		-1.34505	0.128979	-1.26562	0.0689811	-1.13242	0.313751
ILMN_1214994	NM_009918.1	Cnga3	CNG3	Mus musculus cyclic nucleotide gated channel alpha 3 (Cnga3), mRNA.	1.14427	0.0178085	1.13905	0.126357	1.02235	0.0717002		-1.06969	0.245938	-1.15499	0.273161	-1.03469	0.140554
ILMN_1214998	NM_008288.1	Hsd11b1			-1.15901	0.067827	-1.88888	0.141632	-1.871	0.104534		-1.06972	0.276357	-2.42631	0.0436397	-2.22898	0.117551
ILMN_1215003	NM_172496	Cobl			-1.01347	0.0780507	-1.12655	0.0943071	-1.2168	0.090771		1.07246	0.141101	1.06968	0.143677	-1.04257	0.205542
ILMN_1215004	NM_173350.1	Osbpl9	AU015843; MGC30367; ORP-9; MGC38458; 2600011I06Rik	Mus musculus oxysterol binding protein-like 9 (Osbpl9), transcript variant 2, mRNA.	-1.00807	0.0342324	1.12959	0.115086	-1.1246	0.102516		1.22552	0.113556	1.19044	0.155064	1.31321	0.509535
ILMN_1215009	NM_025931.2	Rabl4	2600013G09Rik	Mus musculus RAB, member of RAS oncogene family-like 4 (Rabl4), mRNA.	1.01583	0.116387	-1.06884	0.0732348	1.04733	0.0490036		-1.03964	0.0483357	-1.15182	0.0597037	-1.22353	0.465406
ILMN_1215010		4930455G09Rik			1.41695	0.276427	1.95073	0.75663	1.4633	0.184946		-1.07808	0.293316	-1.16641	0.379147	-1.04599	0.628599
ILMN_1215011	NM_130889.2	Anp32b	Ssp29; 2410015B15Rik; PHAPI2a; MGC103080; PAL31	Mus musculus acidic nuclear phosphoprotein 32 family, member B (Anp32b), mRNA.	1.15757	0.302424	1.05432	0.223097	1.02793	0.06546		-1.10511	0.150845	-1.16495	0.082342	-1.15055	0.163005
ILMN_1215013	NM_009432.1	Tshb	MGC151206; MGC151208	Mus musculus thyroid stimulating hormone, beta subunit (Tshb), mRNA.	-1.04095	0.151354	1.01205	0.134482	-1.0517	0.0523649		-1.22188	0.158803	-1.21585	0.133159	-1.06827	0.0459096
ILMN_1215014	AK043006	A730047D20Rik			1.13037	0.0692748	1.14488	0.252993	1.12678	0.0722081		-1.00518	0.0560396	-1.02541	0.0877635	1.03616	0.183991
ILMN_1215017	AK037041	9930102A09Rik			-1.04774	0.0466669	-1.16376	0.10282	-1.01837	0.183658		-1.04849	0.0715604	1.08338	0.210601	1.07981	0.118355
ILMN_1215019	NM_029297.1	Dynlrb2	Dncl2b; DNLC2B; 1700009A04Rik	Mus musculus dynein light chain roadblock-type 2 (Dynlrb2), mRNA.	-1.19458	0.119204	-1.09209	0.0360279	-1.20803	0.135272		-1.01084	0.105942	-1.03514	0.026276	-1.12679	0.0356963
ILMN_1215021	NM_011056.2	Pde4d	Dpde3; 9630011N22Rik	Mus musculus phosphodiesterase 4D, cAMP specific (Pde4d), mRNA.	1.08101	0.105851	1.01974	0.140607	1.0664	0.184945		-1.18397	0.0858546	-1.03561	0.0907654	-1.27094	0.202036
ILMN_1215023	NM_001033498.1	Gramd2	BC064463	Mus musculus GRAM domain containing 2 (Gramd2), mRNA.	-1.11294	0.0965496	-1.2257	0.0528624	-1.15399	0.220851		1.024	0.207741	-1.07305	0.0859936	1.01901	0.0148544
ILMN_1215026	XM_138955.2	LOC218877			-1.00465	0.0654622	-1.02877	0.111032	1.08503	0.111032		1.20085	0.0930866	1.18257	0.0691972	1.17359	0.0174975
ILMN_1215029	AK037669	A130035M07Rik			-1.04074	0.0898317	-1.08583	0.0654333	-1.09876	0.00795467		-1.0358	0.0896588	1.06926	0.112675	-1.01322	0.0689631
ILMN_1215034	XR_034000.1	LOC668160		PREDICTED: Mus musculus similar to High mobility group box 1 (LOC668160), misc RNA.	1.07168	0.0741807	-1.01216	0.0615868	-1.00548	0.0918351		1.01918	0.0356087	-1.07048	0.149487	1.0292	0.0312402
ILMN_1215036	XM_484753	4933401L05Rik			1.0111	0.0669056	1.02344	0.143842	-1.01191	0.0609652		-1.07905	0.14054	-1.15846	0.0789833	-1.04418	0.0565188
ILMN_1215038	XM_986882.1	1700085A12Rik		PREDICTED: Mus musculus RIKEN cDNA 1700085A12 gene (1700085A12Rik), mRNA.	1.0034	0.0517701	-1.00726	0.102505	-1.08492	0.092915		1.07343	0.0565201	-1.07651	0.0679831	-1.02083	0.0718174
ILMN_1215039	NM_028634.3	Cby1	Pgea1; arb1; PGEA14; 1110014P06Rik; CBY	Mus musculus chibby homolog 1 (Drosophila) (Cby1), mRNA.	-1.06541	0.075697	1.02582	0.158689	-1.09115	0.149768		-1.28336	0.128896	-1.2412	0.119886	-1.15588	0.0856624
ILMN_1215040	AK052345	D330034K12Rik			-1.04676	0.103791	-1.20987	0.076614	-1.04818	0.20818		-1.02611	0.10701	-1.23538	0.0555141	-1.07102	0.0744076
ILMN_1215042	NM_172791.2	Pla2g3	9130003P18Rik	Mus musculus phospholipase A2, group III (Pla2g3), mRNA.	1.00709	0.138413	1.13875	0.0646919	1.27891	0.0619318		-1.06992	0.15591	1.23772	0.147218	1.19058	0.200254
ILMN_1215043	AK004016	1110032A03Rik			1.04063	0.0418169	1.11462	0.127493	-1.08027	0.0625122		1.01593	0.136065	-1.09954	0.179198	1.01975	0.0675267
ILMN_1215045	XM_127449.2	Slc6a19			1.00217	0.210626	-1.09395	0.0781457	-1.11057	0.076938		1.06163	0.0702518	-1.04436	0.183344	-1.05174	0.0852527
ILMN_1215049	NM_009408.1	Top1			1.18062	0.433168	-1.04582	0.489727	1.0872	0.524171		-1.26776	0.373856	1.15218	0.330627	1.30209	0.45566
ILMN_1215051	XM_358578.1	LOC381435			-1.06306	0.0630034	-1.07436	0.12711	-1.04079	0.0911593		1.05179	0.109717	-1.10247	0.0724564	1.0018	0.0900985
ILMN_1215054	NM_206870.1	OTTMUSG00000007655	RP23-67C1.1; MuIFN-alpha-A	Mus musculus predicted gene, OTTMUSG00000007655 (OTTMUSG00000007655), mRNA.	1.0144	0.0912718	1.01778	0.0955905	-1.05364	0.0669063		-1.02271	0.12332	-1.01693	0.15319	1.02773	0.0823588
ILMN_1215055	NM_011585.3	Tia1	mTIA-1; 2310050N03Rik; AI256674	Mus musculus cytotoxic granule-associated RNA binding protein 1 (Tia1), mRNA.	1.18718	0.0485621	1.73063	0.0360746	1.27588	0.0195249		1.04617	0.506652	1.4438	0.463405	1.48999	0.377224
ILMN_1215057	NM_001077684.1	4930578N16Rik	4930525K21Rik; RP23-174C9.4	Mus musculus RIKEN cDNA 4930578N16 gene (4930578N16Rik), mRNA.	-1.0123	0.0813387	1.05458	0.14141	1.07416	0.0405278		-1.00419	0.0142762	-1.05201	0.0829197	-1.0139	0.106604
ILMN_1215061	NM_182997.2	Prkab2	BB124140; AW049591; 5730553K21Rik	Mus musculus protein kinase, AMP-activated, beta 2 non-catalytic subunit (Prkab2), mRNA.	1.07564	0.0755543	1.26193	0.032275	1.18387	0.123005		-1.15266	0.199429	1.16774	0.0599667	1.14739	0.175091
ILMN_1215066	NM_207133.2	Olfr741	MOR106-15; MOR106-10	Mus musculus olfactory receptor 741 (Olfr741), mRNA.	1.03642	0.102811	-1.0099	0.0690682	-1.05882	0.114245		-1.00045	0.105375	-1.06967	0.0266322	-1.04095	0.0545216
ILMN_1215067	NM_013502.2	Ctbp1	CtBP1-L; CtBP3/BARS; BARS; D4S115h; D5H4S115E; D5H4S115; CtBP1-S	Mus musculus C-terminal binding protein 1 (Ctbp1), mRNA. XM_922007	1.03104	0.0484959	1.03102	0.100626	-1.04314	0.103272		-1.06446	0.165133	-1.07327	0.0915495	-1.17196	0.185057
ILMN_1215073	NM_027373.2	Afap1	AI848729; mKIAA3018; Afap; 9630044L16Rik; 2600003E23Rik	Mus musculus actin filament associated protein 1 (Afap1), mRNA.	-1.19007	0.0328646	1.05854	0.0623343	1.00059	0.0819909		1.02274	0.103519	1.07774	0.0371095	-1.07189	0.17639
ILMN_1215074	NM_019915.2	Art2b	Rt-6; Rt6-2; ART2.2; Art; Rt6; Ly92b	Mus musculus ADP-ribosyltransferase 2b (Art2b), mRNA.	3.7072	1.10225	1.92044	0.342085	1.22696	1.37338		2.29806	0.580039	2.18461	0.550848	2.08308	0.00377244
ILMN_1215076	AK089567	F830002E14Rik			-1.82471	0.203192	-9.75787	0.0179245	-2.02339	0.0549662		-1.73235	0.146751	-4.9154	0.166752	-3.08759	0.39528
ILMN_1215080	XM_001473469.1	4930461P20Rik		PREDICTED: Mus musculus RIKEN cDNA 4930461P20 gene (4930461P20Rik), mRNA.	-1.13752	0.133012	-1.28019	0.186861	-1.29106	0.121283		-1.0476	0.134013	-1.14956	0.0552262	-1.04976	0.226357
ILMN_1215081	AK089227	F630047D10Rik			-1.17403	0.0914486	-1.02233	0.0355673	-1.10398	0.0603071		-1.28247	0.241296	-1.16839	0.222609	-1.17027	0.0519546
ILMN_1215084	NM_023215	2500003M10Rik			1.08375	0.186323	-1.02457	0.198731	1.18351	0.149148		-1.06699	0.117095	1.07399	0.0788618	-1.01372	0.0756576
ILMN_1215085	NM_010221.1	Fkbp10	Fkbp6; AI325255; Fkbp-rs1; FKBP65; Fkbp1-rs; 65kDa	Mus musculus FK506 binding protein 10 (Fkbp10), mRNA.	1.0678	0.197028	3.05131	0.602085	2.5225	0.440869		1.03524	1.9589	3.61294	0.438431	2.34686	1.50426
ILMN_1215089	AK036677	Fto			-1.0489	0.166843	-1.02527	0.0317786	-1.21312	0.0963485		-1.09483	0.0674401	-1.06696	0.0414668	-1.10114	0.0936516
ILMN_1215090	NM_139063.1	Muted	1810074A19Rik; mu	Mus musculus muted (Muted), mRNA.	-1.0418	0.0557537	-1.21791	0.160005	-1.06048	0.0663178		1.24909	0.22421	1.07485	0.236378	1.02149	0.00910473
ILMN_1215091	NM_015824.3	Orc3l	Orc3	Mus musculus origin recognition complex, subunit 3-like (S. cerevisiae) (Orc3l), mRNA.	1.0322	0.0566594	-1.24495	0.0435552	-1.64205	0.0967693		1.21352	0.14662	-1.06588	0.0539363	-1.11906	0.301594
ILMN_1215092	NM_011413.2	C4a	Slp	Mus musculus complement component 4A (Rodgers blood group) (C4a), mRNA.	1.18746	0.184599	1.32928	0.226629	1.49182	0.202859		1.08541	0.165542	1.0537	0.196702	1.40367	0.333312
ILMN_1215096	NM_007647.2	Entpd5	NTPDase-5; Pcph; mNTPase; AI987697; AI196558; Cd39l4; ER-UDPase; NTPDase5	Mus musculus ectonucleoside triphosphate diphosphohydrolase 5 (Entpd5), transcript variant 1, mRNA.	-1.20207	0.083082	-1.49531	0.132988	-1.92793	0.0995649		1.10736	0.33964	-1.60678	0.0584812	-1.8989	0.083598
ILMN_1215103	XM_145418.2	LOC243868			-1.02409	0.132587	-1.01251	0.153743	-1.14476	0.074947		1.02629	0.0256258	1.17669	0.107349	1.04204	0.139188
ILMN_1215110	AK052898	Cacna2d1			-1.01398	0.0165093	1.18888	0.11709	1.1366	0.0457998		-1.03545	0.181002	1.08281	0.0763271	1.08291	0.0904564
ILMN_1215115	NM_177746.3	Dgat2l4	9430062J17Rik	Mus musculus diacylglycerol O-acyltransferase 2-like 4 (Dgat2l4), mRNA.	-1.01968	0.173873	-1.10595	0.110451	-1.03477	0.145513		-1.00753	0.0653954	1.00129	0.039439	-1.07609	0.0978568
ILMN_1215117	NM_019912.1	Ube2d2	ubc4; 1500034D03Rik; Ubc2e	Mus musculus ubiquitin-conjugating enzyme E2D 2 (Ube2d2), mRNA.	1.05614	0.082551	-1.03594	0.090664	-1.35255	0.105837		1.02867	0.0278099	-1.04664	0.00938408	-1.15317	0.197295
ILMN_1215120	NM_013658.2	Sema4a	AI132332; SemB; Semab	Mus musculus sema domain, immunoglobulin domain (Ig), transmembrane domain (TM) and short cytoplasmic domain, (semaphorin) 4A (Sema4a), mRNA.	-1.08188	0.0900186	-1.05105	0.143283	1.00288	0.0977641		1.09805	0.102381	-1.2246	0.0817157	1.01615	0.2186
ILMN_1215122	XM_162190.1	4932408L24Rik			1.0268	0.064279	1.03095	0.0694197	-1.05261	0.124843		-1.01026	0.0920727	-1.10777	0.176334	1.02816	0.00418499
ILMN_1215123	AK080591	A830007N09Rik			-1.09996	0.106692	-1.13725	0.0782996	-1.39937	0.0942891		-1.00077	0.141123	-1.11979	0.0825658	-1.17914	0.17663
ILMN_1215124	NM_026167.3	Klhl13	AI451128; Bklhd2; mKIAA1309; 1200009K10Rik; D130072F20Rik	Mus musculus kelch-like 13 (Drosophila) (Klhl13), mRNA.	1.13825	0.118633	-1.14154	0.0703367	-1.04477	0.364944		-1.207	0.0677057	-1.18355	0.0841679	-1.03448	0.0487332
ILMN_1215125	NM_001081070.1	Pdia2	AI661267; 1810041F13Rik; MGC144891; Pdipl; Pdip	Mus musculus protein disulfide isomerase associated 2 (Pdia2), mRNA.	1.08019	0.112782	1.01051	0.147843	1.03141	0.107636		1.62645	0.0871654	-1.11974	0.104432	-1.13515	0.134077
ILMN_1215127	NM_145521.3	Ppapdc3	D830019K17Rik	Mus musculus phosphatidic acid phosphatase type 2 domain containing 3 (Ppapdc3), mRNA.	1.09478	0.0924873	-1.09265	0.0691195	-1.19194	0.0523279		-1.06466	0.0359545	-1.13831	0.0621875	-1.0318	0.0879681
ILMN_1215134	NM_198647.1	Tbc1d22b	MGC61359; BC045600; MGC31516	Mus musculus TBC1 domain family, member 22B (Tbc1d22b), mRNA.	1.18783	0.191408	1.27199	0.109504	1.35827	0.214237		1.08328	0.282482	1.08571	0.277474	-1.06602	0.513006
ILMN_1215135	NM_010150.2	Nr2f6	Erbal2; AV090102; EAR2; COUP-TF3	Mus musculus nuclear receptor subfamily 2, group F, member 6 (Nr2f6), mRNA.	-1.08223	0.11104	-1.24311	0.117914	-1.04794	0.174436		-1.22971	0.207479	-1.34076	0.0837691	-1.40558	0.268675
ILMN_1215136	NM_178227.4	Scn3b	4833414B02Rik; Scnb3; 1110001K16Rik	Mus musculus sodium channel, voltage-gated, type III, beta (Scn3b), transcript variant 2, mRNA.	-1.13781	0.098687	-1.10722	0.118217	-1.09794	0.244746		1.05178	0.118188	1.21168	0.224486	1.09966	0.0788421
ILMN_1215139	NM_053096.3	Cml2		Mus musculus camello-like 2 (Cml2), mRNA.	-1.11752	0.0364829	-1.39923	0.217735	-1.98524	0.280019		-1.34087	0.0278867	-1.80534	0.1053	-1.12158	0.207267
ILMN_1215143	XM_358524.1	LOC381192			-1.04493	0.00899194	-1.06802	0.144263	-1.08349	0.0122231		1.02134	0.105708	-1.18856	0.0415143	-1.14266	0.0770771
ILMN_1215145	NM_011526	Tagln			1.05165	0.198362	1.06026	0.0229277	1.15558	0.148421		1.04515	0.0335039	1.00054	0.0711651	1.15486	0.15214
ILMN_1215147	XM_001472872.1	LOC100044829		PREDICTED: Mus musculus similar to Fibrillarin, transcript variant 1 (LOC100044829), mRNA.	1.01709	0.149842	1.26994	0.128104	1.19433	0.111105		-1.03291	0.234762	1.03455	0.210192	-1.0724	0.501523
ILMN_1215149	NM_001004062.2	Crtc1	mKIAA0616; AI413414; TORC1; Mect1; R74955; MGC90786	Mus musculus CREB regulated transcription coactivator 1 (Crtc1), mRNA.	1.12144	0.169494	1.1378	0.0425281	1.09198	0.0698353		1.0352	0.0622936	1.00472	0.117593	1.06039	0.18475
ILMN_1215157	XR_033486.1	LOC100047369		PREDICTED: Mus musculus similar to 0610007P22Rik protein (LOC100047369), misc RNA.	1.00163	0.102316	-1.06395	0.135185	-1.13921	0.0723588		-1.20682	0.0914107	-1.25058	0.0935783	-1.11713	0.156167
ILMN_1215162	XM_994182.1	Cdc42bpa		PREDICTED: Mus musculus Cdc42 binding protein kinase alpha, transcript variant 1 (Cdc42bpa), mRNA.	-1.04771	0.0558442	1.01264	0.219111	-1.06802	0.0518917		-1.14038	0.0617947	-1.11371	0.00647189	-1.04908	0.092498
ILMN_1215163	XM_358561.1	LOC381380			-1.12033	0.114453	-1.15829	0.089802	-1.08052	0.0635136		-1.00873	0.0775072	1.0037	0.0994684	-1.03872	0.049242
ILMN_1215164	AK029140	Prc1			-1.09794	0.00583929	-1.04557	0.0374913	-1.05809	0.117439		1.00344	0.0853496	1.04053	0.0828395	1.05649	0.122459
ILMN_1215167	NM_007840.3	Ddx5	2600009A06Rik; HUMP68; Hlr1; p68; MGC118083; G17P1	Mus musculus DEAD (Asp-Glu-Ala-Asp) box polypeptide 5 (Ddx5), mRNA.	1.10953	0.295852	1.35914	0.116607	1.2828	0.743643		1.38357	0.283173	1.45785	0.263208	-1.14515	0.270643
ILMN_1215171	AK090393	Tgfbr2			-1.11327	0.0473188	-1.09712	0.10886	-1.1356	0.131805		-1.00648	0.0603338	-1.00003	0.0608172	1.00425	0.121575
ILMN_1215172	AK090289	Folh1			-1.09844	0.0432837	-1.09952	0.066505	-1.06038	0.064719		1.07225	0.166735	-1.06961	0.0966725	1.02382	0.0599081
ILMN_1215174	NM_133968.1	Snapc2	AU015675; 0610007H10Rik	Mus musculus small nuclear RNA activating complex, polypeptide 2 (Snapc2), mRNA.	-1.11342	0.288971	-1.02851	0.0244432	-1.18508	0.0864294		1.02313	0.0857122	-1.07413	0.105112	-1.01813	0.081177
ILMN_1215180		3300002P13Rik			-1.2556	0.0359642	-1.24621	0.0270158	-1.25621	0.104144		-1.06147	0.096068	-1.0198	0.162852	-1.09201	0.0761807
ILMN_1215183	NM_008130.2	Gli3	AU023367; add; Bph; Xt; AI854843; Pdn	Mus musculus GLI-Kruppel family member GLI3 (Gli3), mRNA.	1.03932	0.076533	1.01164	0.0944255	1.03653	0.0693848		-1.01307	0.102807	-1.12864	0.0565451	1.05743	0.111746
ILMN_1215184	NR_003644.1	1700049L16Rik		Mus musculus RIKEN cDNA 1700049L16 gene (1700049L16Rik) on chromosome 10.	1.10527	0.101587	-1.04042	0.0895904	-1.05633	0.0686665		1.05611	0.120034	-1.05257	0.104171	-1.03159	0.129639
ILMN_1215190	AK052398	D430002C13Rik			-1.1623	0.0218074	-1.05369	0.057548	-1.02087	0.0959949		-1.12329	0.0526124	-1.11372	0.033389	-1.19353	0.0679441
ILMN_1215193	AK041589	A630023D23Rik			1.09865	0.0693416	-1.003	0.0909326	1.07401	0.0184894		-1.02728	0.0586551	1.01707	0.0328707	-1.03795	0.234656
ILMN_1215197	AK007004	1700085C21Rik			-1.04535	0.102085	-1.09264	0.0247325	-1.13413	0.118852		1.00607	0.0672753	1.03989	0.140705	-1.00876	0.0754975
ILMN_1215203	NM_172475	Frmd4a			1.44264	0.273729	1.31788	0.610938	1.32673	0.315784		1.19906	0.125325	1.64581	0.0835739	1.47818	0.138629
ILMN_1215208	NM_010091.3	Dvl1	Dvl; mKIAA4029; KIAA4029	Mus musculus dishevelled, dsh homolog 1 (Drosophila) (Dvl1), mRNA.	-1.09326	0.0189936	-1.24301	0.133681	-1.36943	0.0917505		-1.10495	0.224687	-1.29266	0.129879	-1.38939	0.0266732
ILMN_1215209	NM_019948.1	Clecsf9			-1.0746	0.0282734	4.74317	1.46416	2.51135	0.909984		1.15669	1.64105	2.20419	1.23934	1.52407	0.277189
ILMN_1215212	NM_007483.2	Rhob	Arh6; MGC117867; AA017882; Arhb	Mus musculus ras homolog gene family, member B (Rhob), mRNA.	1.2481	0.235019	1.89684	1.6636	2.63493	0.636442		1.25305	0.629331	3.10531	0.119489	2.85724	0.431081
ILMN_1215213	NM_001040396.2	2810407C02Rik	SelT; 5730408P04Rik	Mus musculus RIKEN cDNA 2810407C02 gene (2810407C02Rik), mRNA.	-1.09286	0.0601206	-1.3103	0.0794498	-1.40589	0.0814613		1.09884	0.220903	-1.12322	0.137432	-1.37919	0.0877677
ILMN_1215216	XM_001480757.1	LOC100043697		PREDICTED: Mus musculus hypothetical protein LOC100043697 (LOC100043697), mRNA.	-1.23441	0.0411633	-1.21946	0.0116425	-1.17169	0.122888		-1.00047	0.235096	-1.06158	0.133452	-1.03702	0.12816
ILMN_1215217	XM_988327.1	LOC436539		PREDICTED: Mus musculus similar to TRAV6-2 (LOC436539), mRNA.	-1.01098	0.115452	1.0164	0.167738	-1.03419	0.129266		1.07799	0.036576	1.10668	0.14787	1.15822	0.10874
ILMN_1215218	NM_145410.3	BC008155	MGC6974	Mus musculus cDNA sequence BC008155 (BC008155), mRNA.	1.00895	0.137341	1.15387	0.180784	1.04826	0.154465		-1.02028	0.125829	-1.01238	0.0695809	1.06659	0.136895
ILMN_1215223	AK080676	A830081I21Rik			1.02289	0.111276	1.03879	0.137056	1.27468	0.285928		-1.21045	0.101373	-1.12845	0.0917309	-1.06351	0.279248
ILMN_1215224	NM_033588.4	Pcdhga5		Mus musculus protocadherin gamma subfamily A, 5 (Pcdhga5), mRNA.	-1.06163	0.0160574	1.00842	0.0745617	-1.05731	0.0649034		-1.06833	0.0931584	1.01031	0.1119	-1.02163	0.0821376
ILMN_1215227	NM_146026	BC022765			-1.06756	0.0711074	-1.08732	0.0846449	-1.04914	0.0962688		1.07322	0.128882	-1.08875	0.0634287	-1.04154	0.163723
ILMN_1215233	NM_026198.1	2010200O16Rik		Mus musculus RIKEN cDNA 2010200O16 gene (2010200O16Rik), mRNA.	-1.04526	0.109234	-1.25836	0.108089	-1.11539	0.200989		-1.12165	0.0859193	-1.11574	0.121842	-1.12685	0.110169
ILMN_1215234	XM_139718.2	LOC224487			1.07544	0.14211	1.11138	0.0530162	-1.03976	0.0526501		-1.04282	0.0353144	1.04417	0.0344907	1.0307	0.0187314
ILMN_1215238	NM_172904.2	Fsd2	Spryd1; 9830160G03Rik	Mus musculus fibronectin type III and SPRY domain containing 2 (Fsd2), mRNA.	-1.22876	0.118365	-1.23857	0.273103	-1.21871	0.21457		1.29415	0.210578	1.19714	0.220553	1.17713	0.196564
ILMN_1215242	NM_145371.3	Eif2b1	26kDa; D5Ertd406e; MGC6458; EIF2BA; EIF2B	Mus musculus eukaryotic translation initiation factor 2B, subunit 1 (alpha) (Eif2b1), mRNA.	1.0942	0.151435	1.09352	0.121825	-1.02278	0.200195		-1.13847	0.133177	-1.05923	0.133179	1.01229	0.177252
ILMN_1215246	NM_023644.3	Mccc1	Mcca; MCCalpha; 2310058B18Rik; 1810045E08Rik; R75106	Mus musculus methylcrotonoyl-Coenzyme A carboxylase 1 (alpha) (Mccc1), mRNA.	-1.12367	0.548004	-1.97041	0.238285	-1.73105	0.419466		-1.00113	0.542401	-1.43625	0.231349	-1.36359	0.277093
ILMN_1215251	XM_986926.1	Mgam		PREDICTED: Mus musculus maltase-glucoamylase, transcript variant 1 (Mgam), mRNA.	1.03409	0.103299	-1.42354	0.0545931	-1.8405	0.0279684		1.0558	0.206781	-1.5855	0.097797	-1.35274	0.256778
ILMN_1215252	NM_007554.2	Bmp4	Bmp2b1; Bmp2b-1; Bmp2b	Mus musculus bone morphogenetic protein 4 (Bmp4), mRNA.	1.05639	0.156146	-1.10048	0.0768477	-1.09311	0.117744		-1.06465	0.131684	-1.4045	0.201184	-1.25922	0.129042
ILMN_1215254	AK037598	Stat4			1.06465	0.195658	1.03506	0.0245806	1.15542	0.209931		-1.00368	0.0656268	1.06464	0.103446	-1.03198	0.16856
ILMN_1215264	XM_122407.1	Tfb2m			-1.34059	0.122836	-1.3566	0.0966125	-1.30793	0.192247		-1.1372	0.129614	-1.1637	0.0458984	-1.04314	0.38844
ILMN_1215265		5730507C05Rik			-1.00977	0.0796578	-1.04368	0.0930042	-1.1217	0.177263		1.13677	0.12697	1.02124	0.0875653	1.09592	0.0718569
ILMN_1215266	AK039011	Cerd4-pending			-1.02046	0.140757	-1.26773	0.0699573	-1.20532	0.0354622		-1.19486	0.0476729	-1.22979	0.0517971	-1.30895	0.0415157
ILMN_1215275	NM_001024458.2	Add1	AI256389	Mus musculus adducin 1 (alpha) (Add1), transcript variant 1, mRNA.	1.05198	0.107979	1.28332	0.320353	1.62972	0.183745		1.08655	0.270973	1.58804	0.189009	1.2509	0.520442
ILMN_1215277	XM_135116.7	Pik3r4		PREDICTED: Mus musculus phosphatidylinositol 3 kinase, regulatory subunit, polypeptide 4, p150, transcript variant 1 (Pik3r4), mRNA.	1.01624	0.0351102	1.10816	0.123638	1.02554	0.0481772		1.18251	0.0237584	1.11846	0.15287	1.0721	0.0676776
ILMN_1215278	AK081534	Msx1			1.01424	0.13639	-1.12112	0.113022	-1.10131	0.061776		1.06647	0.068865	1.08049	0.130658	1.07296	0.146032
ILMN_1215280	XM_128487.2	LOC224732			1.02697	0.1118	-1.13731	0.0315666	-1.36779	0.213864		-1.10677	0.127749	-1.13842	0.0496804	-1.29001	0.264011
ILMN_1215281	XM_001475087.1	Tcrg		PREDICTED: Mus musculus T cell receptor gamma chain (Tcrg), mRNA.	1.10561	0.0492632	-1.03848	0.0644651	-1.02274	0.119524		1.08678	0.241548	1.06562	0.158612	1.18666	0.0972679
ILMN_1215283	XM_357776.1	LOC384664			1.04028	0.162646	-1.0796	0.0691819	1.01339	0.0984829		-1.1096	0.0678752	-1.17108	0.0468583	-1.04191	0.0447602
ILMN_1215295		3222401L13Rik			1.06134	0.161176	1.01672	0.165274	1.12072	0.114461		-1.0881	0.173251	-1.06557	0.0383101	-1.08665	0.144539
ILMN_1215297	XM_140204.7	Asxl3		PREDICTED: Mus musculus additional sex combs like 3 (Drosophila) (Asxl3), mRNA.	-1.05568	0.13612	1.04307	0.12415	-1.19865	0.146703		-1.01444	0.0318713	-1.03391	0.158066	1.00752	0.0979427
ILMN_1215298	AK044659	A930030D01Rik			1.01403	0.0729671	-1.0668	0.113995	-1.08347	0.10131		1.05507	0.00742064	-1.00035	0.047932	1.07756	0.0979379
ILMN_1215300	NM_027170.1	2310057N15Rik	MGC129405; Krtap13-1	Mus musculus RIKEN cDNA 2310057N15 gene (2310057N15Rik), mRNA.	-1.06121	0.0886377	-1.06022	0.0375756	1.05205	0.215235		1.06329	0.0269627	1.02295	0.18038	1.08359	0.264582
ILMN_1215304	NM_001015099.1	6030408C04Rik	AW046379; D930034K21Rik; 9030416F18; mKIAA1333	Mus musculus RIKEN cDNA 6030408C04 gene (6030408C04Rik), mRNA.	1.03732	0.160731	1.11695	0.107904	1.10351	0.117952		-1.09601	0.094797	-1.00372	0.0685901	1.00883	0.0350787
ILMN_1215305	NM_020005.3	Pcaf	A930006P13Rik; AW536563; AI461839	Mus musculus p300/CBP-associated factor (Pcaf), mRNA.	-1.14796	0.0542904	-1.42725	0.140003	-1.59634	0.137962		1.04403	0.287018	-1.47792	0.0813227	-1.40733	0.231108
ILMN_1215311	XM_355960.1	LOC381936			1.06427	0.100288	1.02912	0.0753139	1.03307	0.19169		-1.11687	0.126538	-1.11857	0.131606	-1.15976	0.0934214
ILMN_1215324	AK031254	5930437L24Rik			1.02569	0.107835	-1.02414	0.10361	1.0516	0.137488		1.04116	0.13509	-1.13904	0.116693	1.00929	0.0319629
ILMN_1215327	AK012989	Col4a3bp			-1.18264	0.0393518	1.09121	0.0725969	-1.34078	0.125384		1.04065	0.114418	1.02485	0.0412502	-1.11591	0.102014
ILMN_1215329	AK019450	3230402H02Rik			-1.31476	0.095718	-1.25673	0.0736977	-1.3134	0.110608		-1.00592	0.122487	-1.15978	0.120483	-1.14412	0.235337
ILMN_1215331	NM_148948.2	Dicer1	mKIAA0928; 1110006F08Rik; D12Ertd7e	Mus musculus Dicer1, Dcr-1 homolog (Drosophila) (Dicer1), mRNA.	1.10292	0.0951316	1.42894	0.145209	1.20767	0.145773		-1.13912	0.397025	1.17673	0.19324	1.18614	0.194424
ILMN_1215332	XM_122761.3	LOC219145			-1.14307	0.108633	1.03698	0.413866	1.03352	0.134925		-1.01784	0.0886132	1.39737	0.151289	1.15507	0.230017
ILMN_1215333	AK039257	A330008J08Rik			1.2263	0.12111	1.08705	0.128491	1.10859	0.115675		1.01201	0.0954036	-1.01948	0.229521	-1.0433	0.197174
ILMN_1215334	AK050771	D030018H12Rik			-1.00285	0.0934272	1.11199	0.0605553	1.20879	0.0374365		1.30594	0.0576769	1.11191	0.106218	1.20349	0.139139
ILMN_1215335	XM_990244.1	LOC667383		PREDICTED: Mus musculus similar to ring finger protein 168 (LOC667383), mRNA.	1.00312	0.0841147	-1.03882	0.0726343	-1.11839	0.118153		1.05816	0.109573	-1.02961	0.0557177	1.07461	0.116315
ILMN_1215336	XM_001480577.1	Zfp422-rs1		PREDICTED: Mus musculus zinc finger protein 422, related sequence 1 (Zfp422-rs1), mRNA.	-1.14146	0.0532496	-1.59418	0.194281	-1.52018	0.0168336		1.00435	0.285967	-1.16454	0.155155	-1.19174	0.208761
ILMN_1215338	XM_979162.1	LOC665746		PREDICTED: Mus musculus similar to spermiogenesis specific transcript on the Y 1 (LOC665746), mRNA.	-1.05084	0.0163126	-1.05084	0.170857	1.07756	0.0600666		1.04395	0.134468	1.04061	0.0460606	1.01465	0.0754531
ILMN_1215341	NM_027166.5	Ypel5	CGI-127; 2310076K21Rik	Mus musculus yippee-like 5 (Drosophila) (Ypel5), mRNA.	1.00557	0.0840688	-1.02019	0.0644398	-1.33788	0.0287868		1.02268	0.0668924	-1.13864	0.0586475	-1.31042	0.0688766
ILMN_1215346	XM_144267.2	LOC231118			-1.06262	0.0746141	-1.03231	0.163605	-1.02923	0.110373		-1.14291	0.0336447	-1.17911	0.0980368	-1.0818	0.0959734
ILMN_1215352	NM_028481.1	Ccdc18	MGC100177; 1700021E15Rik; NY-SAR-41; 4932411G06Rik	Mus musculus coiled-coil domain containing 18 (Ccdc18), mRNA.	1.00822	0.0500852	1.12031	0.0188845	1.09554	0.136622		-1.08383	0.0989033	1.06497	0.0651773	-1.03187	0.108875
ILMN_1215361	XM_142472.3	LOC235909			1.03805	0.0726644	1.0384	0.0967914	1.10444	0.0821507		-1.00774	0.0256455	-1.09802	0.0813463	1.00446	0.119306
ILMN_1215362	AK086603	Sec8			1.04815	0.198732	-1.02653	0.0117819	-1.10365	0.134151		1.00572	0.0428327	-1.03875	0.0640324	1.06314	0.0528107
ILMN_1215363	AK014004.1	scl0004029.1_17			-1.02101	0.043861	-1.06275	0.200478	1.06347	0.194535		-1.03281	0.0636524	1.07351	0.0979157	1.14387	0.15637
ILMN_1215366	AK087267	E030040N07Rik			-1.02336	0.0571937	-1.00309	0.0950737	-1.05991	0.0690619		-1.05272	0.100162	1.01539	0.0513554	-1.01546	0.0480032
ILMN_1215367	NM_178602.2	Grinl1a	D9Wsu138e; AA407243; AI303746; AW553238; KIAA4185; mKIAA4185; AA408799	Mus musculus glutamate receptor, ionotropic, N-methyl D-aspartate-like 1A (Grinl1a), mRNA.	1.05329	0.0469999	-1.05471	0.178407	-1.02273	0.160132		1.04175	0.0279313	-1.19106	0.0770945	1.00445	0.164085
ILMN_1215372	NM_021423.1	Shank3			-1.1039	0.074678	1.3505	0.0782004	1.26211	0.142882		1.1312	0.242055	1.31886	0.0879486	1.10454	0.418558
ILMN_1215377	XR_031063.1	LOC100039521		PREDICTED: Mus musculus similar to RNA polymerase I associated factor (Paf53) (LOC100039521), misc RNA.	1.03462	0.0973959	-1.04252	0.100864	-1.05107	0.175489		-1.00152	0.138637	-1.14541	0.043393	1.05087	0.0330603
ILMN_1215381	XM_138960.1	LOC218889			-1.09307	0.0492284	-1.08869	0.073119	-1.00808	0.0628799		-1.02954	0.0308323	-1.03534	0.0123643	1.01141	0.0220877
ILMN_1215384	XM_357753.1	LOC384628			1.10499	0.0185062	1.0677	0.201008	1.06946	0.0248558		-1.08966	0.12229	-1.12648	0.0699709	-1.08978	0.170591
ILMN_1215386	NM_001081206.1	Dgki	C130010K08Rik	Mus musculus diacylglycerol kinase, iota (Dgki), mRNA.	-1.0066	0.0601932	-1.03071	0.0214322	1.01794	0.137862		-1.04187	0.0225643	-1.10754	0.0321314	1.07136	0.245638
ILMN_1215394	NM_028121.2	Adpgk	Adp-gk; 2610017G09Rik; C77577	Mus musculus ADP-dependent glucokinase (Adpgk), mRNA.	1.14089	0.106221	1.21152	0.207762	1.21203	0.058852		1.02738	0.102372	-1.09198	0.146844	1.00794	0.169189
ILMN_1215398	AK045953	B230326M20Rik			-1.20326	0.0695891	-1.05788	0.0720205	-1.04381	0.0734499		1.00233	0.119718	-1.04343	0.0155844	-1.02772	0.121017
ILMN_1215400	NM_031868.2	Ppp1ca	dism2; Ppp1c	Mus musculus protein phosphatase 1, catalytic subunit, alpha isoform (Ppp1ca), mRNA.	1.25804	0.0443166	1.36234	0.122238	1.48332	0.271768		1.03639	0.237792	1.40758	0.073556	1.05369	0.309952
ILMN_1215401	NM_133228.2	Zfp87	Mzf22; 4631412O18Rik; KRAB4; MGC25780; Zfp72; 2210039O17Rik	Mus musculus zinc finger protein 87 (Zfp87), mRNA.	1.0647	0.0279665	1.15557	0.149326	1.04002	0.0815654		1.037	0.0706609	1.17621	0.0041866	1.0464	0.0891508
ILMN_1215404	AK085580	D630043K02Rik			1.04195	0.0783958	1.04619	0.175407	-1.13498	0.122628		-1.03575	0.182452	-1.18071	0.138532	-1.09295	0.0543337
ILMN_1215405	NM_001039939.1	Asxl1	DKFZp434N0535; mKIAA0978	Mus musculus additional sex combs like 1 (Drosophila) (Asxl1), mRNA.	-1.05113	0.20287	1.13008	0.295698	1.4244	0.678988		-1.04088	0.230124	1.16832	0.292923	1.14748	0.195445
ILMN_1215407	AK046601	B430202K04Rik			-1.07005	0.116301	-1.02981	0.098979	-1.06322	0.158418		1.08122	0.0792372	-1.00017	0.103207	1.07783	0.101563
ILMN_1215409	NM_027366.1	Ly6g6e	G6e; 2310011I02Rik	Mus musculus lymphocyte antigen 6 complex, locus G6E (Ly6g6e), mRNA.	1.09736	0.115865	1.00395	0.0405777	-1.0315	0.181342		1.19419	0.256972	1.1356	0.166847	1.10541	0.106741
ILMN_1215412	AK087272	Neo1			1.01307	0.145571	-1.16593	0.0198631	-1.13117	0.0372901		-1.05078	0.0911096	-1.12285	0.0742958	-1.11944	0.0780376
ILMN_1215413	AK048308	C130048C12Rik			-1.10337	0.121337	-1.11513	0.0341637	-1.11159	0.211651		-1.02996	0.0723128	-1.11866	0.0747692	1.03082	0.0576062
ILMN_1215416	XM_207385.3	C130035G06Rik			-1.15474	0.164323	-1.11467	0.0495168	-1.00695	0.434408		-1.16825	0.0933505	-1.19369	0.0663981	-1.36011	0.0805865
ILMN_1215423	XM_147444	4930485B16Rik			1.04439	0.0789256	-1.14087	0.129071	-1.12877	0.156161		1.01118	0.0818636	-1.10533	0.117034	1.02214	0.0402688
ILMN_1215426	XM_356787.1	LOC382993			-1.20459	0.0612272	-1.15425	0.0541533	-1.28257	0.173323		1.12981	0.185808	1.11991	0.235069	1.14205	0.218459
ILMN_1215431	XM_359088.1	LOC386137			-1.10117	0.0393622	-1.09589	0.0351611	-1.05174	0.121099		1.02231	0.037579	-1.08209	0.0689575	1.00237	0.0775278
ILMN_1215434	NM_013910.2	Fbxl10	E430001G17; KIAA3014; Fbl10; mKIAA3014; PCCX2; Cxxc2	Mus musculus F-box and leucine-rich repeat protein 10 (Fbxl10), transcript variant 2, mRNA.	1.03804	0.0486486	1.21469	0.105933	1.089	0.115887		-1.05734	0.0860762	-1.0082	0.169557	1.02542	0.116475
ILMN_1215436	XM_001473263.1	LOC100039649		PREDICTED: Mus musculus similar to secreted gel-forming mucin (LOC100039649), mRNA.	1.04376	0.179589	-1.00141	0.162196	-1.18107	0.143372		-1.03109	0.0852463	-1.15313	0.0569242	-1.24292	0.130884
ILMN_1215437	XM_285687.2	LOC333472			-1.0613	0.0494081	1.01418	0.0692965	1.01823	0.159706		-1.07025	0.1189	-1.05493	0.0807873	1.059	0.0539681
ILMN_1215440	NM_009957.1	Pcdha7	MGC90581; Crnr4; Cnr4	Mus musculus protocadherin alpha 7 (Pcdha7), mRNA.	-1.04254	0.0827146	-1.1157	0.0558332	-1.07078	0.0123939		-1.0161	0.121554	-1.03956	0.0783024	-1.08892	0.0429166
ILMN_1215441	AK044223	A930002C11Rik			1.14135	0.0740761	1.14069	0.0347139	1.08747	0.104065		1.04978	0.0172884	1.06258	0.105086	1.02713	0.0968978
ILMN_1215446	NM_007702.1	Cidea	AW212747	Mus musculus cell death-inducing DNA fragmentation factor, alpha subunit-like effector A (Cidea), mRNA.	1.02431	0.123597	1.33389	0.338284	1.97396	0.368629		-1.13372	0.324364	1.6301	0.113243	1.67785	0.239123
ILMN_1215448	XM_356805.1	LOC383025			-1.03496	0.0255124	1.00987	0.0811998	-1.07366	0.0546488		-1.06433	0.0548187	-1.05834	0.0316046	-1.06648	0.0654572
ILMN_1215449	XM_001479853.1	4931429L15Rik		PREDICTED: Mus musculus RIKEN cDNA 4931429L15 gene (4931429L15Rik), mRNA.	-1.13522	0.11047	-1.12345	0.0994077	-1.17256	0.223604		-1.12434	0.0265225	-1.08014	0.0642772	1.01009	0.0283298
ILMN_1215451	XM_357837.1	LOC384744			1.00429	0.0288047	1.0964	0.0902181	1.03003	0.1463		1.24603	0.0638476	1.11303	0.0713343	1.17562	0.118273
ILMN_1215465	NM_177326.2	Pak2	A130002K10Rik; KIAA4182; AI836325; D16Ertd269e; PAK-2; mKIAA4182	Mus musculus p21 (CDKN1A)-activated kinase 2 (Pak2), mRNA.	1.03213	0.0136539	1.65556	0.170424	1.28202	0.0947546		1.04655	0.181194	1.73194	0.145882	1.36571	0.119873
ILMN_1215466	NM_175632.2	Oscar	mOSCAR-M1; mOSCAR; mOSCAR-M3; mOSCAR-M2	Mus musculus osteoclast associated receptor (Oscar), mRNA.	-1.09713	0.0443817	-1.06403	0.0590517	-1.0183	0.0248762		-1.15019	0.105261	-1.05651	0.0600718	1.03979	0.135276
ILMN_1215469	NM_007830.3	Dbi	ACBD1; Acbp; EP; endozepine	Mus musculus diazepam binding inhibitor (Dbi), transcript variant 2, mRNA.	-1.00072	0.113476	-1.0988	0.0995114	-1.16302	0.133238		1.11113	0.149615	-1.0642	0.0997445	-1.05069	0.135779
ILMN_1215470	AK084929	D430013O20Rik			1.05882	0.231862	1.12162	0.15513	1.04504	0.0209221		1.12799	0.0400373	-1.14524	0.12218	-1.02939	0.115557
ILMN_1215472	NM_018744.2	Sema6a	Sema6A-1; AI851735; 9330158E07; A730020P05Rik; VIa; Semaq	Mus musculus sema domain, transmembrane domain (TM), and cytoplasmic domain, (semaphorin) 6A (Sema6a), mRNA.	-1.02498	0.1617	-1.11404	0.0166219	-1.0282	0.0990291		1.04656	0.16589	-1.14833	0.0586753	-1.13717	0.114169
ILMN_1215475	NM_007883.1	Dsg2	D18Ertd293e; AA408168	Mus musculus desmoglein 2 (Dsg2), mRNA.	-1.11662	0.0467562	-1.64286	0.0618641	-1.68202	0.0276062		-1.08673	0.240896	-1.22817	0.213581	-1.24965	0.218757
ILMN_1215477	NM_146659.2	Olfr1136	MOR177-3	Mus musculus olfactory receptor 1136 (Olfr1136), mRNA.	-1.09245	0.045122	-1.06148	0.0288132	-1.13872	0.0577097		1.02144	0.101445	-1.13217	0.144029	-1.1889	0.0126002
ILMN_1215479	XR_033799.1	LOC100047246		PREDICTED: Mus musculus similar to F-box protein 47 (LOC100047246), misc RNA.	-1.07489	0.0600073	-1.03807	0.0892682	-1.09072	0.0787781		-1.02392	0.104415	1.13111	0.195574	-1.03344	0.0601855
ILMN_1215484	XM_001480119.1	1700122O11Rik		PREDICTED: Mus musculus RIKEN cDNA 1700122O11 gene (1700122O11Rik), mRNA.	-1.05573	0.122911	-1.01058	0.138727	-1.13172	0.187774		-1.10621	0.10771	-1.11393	0.0108356	1.0037	0.0752139
ILMN_1215486	NM_001014836.2	4930404N11Rik	AI854616; 2210409H10Rik; 5730551K18Rik	Mus musculus RIKEN cDNA 4930404N11 gene (4930404N11Rik), mRNA.	1.00938	0.12618	-1.03794	0.163863	-1.01809	0.0902963		-1.06807	0.0756611	-1.06289	0.0368329	-1.05166	0.0511403
ILMN_1215492	AK081243	C030019P07Rik			-1.0736	0.0811615	-1.07411	0.0856859	-1.14788	0.099937		1.05877	0.043004	-1.11828	0.0269057	1.11098	0.188484
ILMN_1215493	NM_012001.1	Cops4	MGC151177; AW208976; D5Ertd774e; MGC151203	Mus musculus COP9 (constitutive photomorphogenic) homolog, subunit 4 (Arabidopsis thaliana) (Cops4), mRNA.	-1.00867	0.114957	-1.06395	0.0324219	-1.06728	0.0546528		1.14997	0.156293	1.06256	0.138996	-1.09563	0.139937
ILMN_1215494	AK087019	Tc10l-pending			-1.0098	0.0870857	-1.15758	0.0557828	-1.08399	0.0167247		1.10622	0.132256	-1.02913	0.125867	-1.01399	0.0603907
ILMN_1215497	AK080521	A730071L15Rik			-1.04074	0.158853	1.03079	0.0512579	-1.00157	0.0772951		-1.0038	0.0218871	-1.00477	0.111843	-1.12076	0.0991312
ILMN_1215500	AK082805	C330023J09Rik			-1.05753	0.0372601	-1.11318	0.147466	-1.013	0.02454		-1.16199	0.0558203	1.03909	0.0650925	-1.03351	0.159331
ILMN_1215501	XM_355523.1	LOC381557			1.04913	0.0807209	-1.04976	0.0322676	-1.09732	0.123636		-1.00272	0.0918598	-1.11018	0.0976217	-1.05393	0.0609557
ILMN_1215502	AK045008	P4ha1			1.14685	0.245917	1.71309	0.522378	1.45935	0.16353		1.23286	0.166996	2.70085	0.735582	1.53455	0.376599
ILMN_1215504	NM_175115.4	Ikzf5	PEGASUS; Zfpn1a5; 2610034F18Rik; MGC106439	Mus musculus IKAROS family zinc finger 5 (Ikzf5), mRNA.	-1.1806	0.0561091	-1.08651	0.0278507	-1.14071	0.182351		-1.06567	0.0228144	-1.08142	0.0637169	1.04257	0.0368551
ILMN_1215517	XM_621454.3	EG224576		PREDICTED: Mus musculus predicted gene, EG224576 (EG224576), mRNA.	1.16115	0.14475	1.05859	0.0131899	1.04786	0.0792293		-1.10657	0.167489	-1.06332	0.18391	-1.17494	0.187617
ILMN_1215518	XM_897666.2	Lrch2		PREDICTED: Mus musculus leucine-rich repeats and calponin homology (CH) domain containing 2, transcript variant 2 (Lrch2), mRNA.	-1.05469	0.0780944	-1.0124	0.0626738	-1.00032	0.0233586		1.01862	0.0359139	1.15542	0.19941	1.06044	0.149775
ILMN_1215521	NM_011943.1	Map2k6	MEK6; Prkmk6; SAPKK3; MKK6	Mus musculus mitogen activated protein kinase kinase 6 (Map2k6), mRNA.	-1.05546	0.0355412	-1.42964	0.0324726	-1.69522	0.0397555		-1.1206	0.162453	-1.46703	0.126569	-1.80306	0.0531859
ILMN_1215523	XR_035395.1	LOC629554		PREDICTED: Mus musculus hypothetical protein LOC629554 (LOC629554), misc RNA.	-1.0766	0.0222443	1.08322	0.124889	-1.03354	0.0904676		1.10581	0.122236	-1.017	0.124511	-1.02077	0.0548522
ILMN_1215524	NM_172614.3	Tmem44	B230220N21; 9330161C17Rik; 1700007N03Rik	Mus musculus transmembrane protein 44 (Tmem44), mRNA.	1.06125	0.0293615	1.23227	0.0941389	1.22974	0.163901		-1.00588	0.152064	1.36701	0.0509425	1.39413	0.0307933
ILMN_1215528	NM_021439.2	Chst11	C4ST1; C4s; C4ST-1; C4ST; 1110020P09Rik	Mus musculus carbohydrate sulfotransferase 11 (Chst11), mRNA.	-1.05143	0.102707	1.07086	0.501522	1.03021	0.183837		1.04663	0.0792849	1.66231	0.237183	1.30756	0.116035
ILMN_1215530	AK013634	Ccnt2			1.07655	0.0723324	1.36108	0.0491503	-1.19559	0.0987112		1.27245	0.148047	1.32644	0.120534	1.22251	0.435053
ILMN_1215532	XM_910139.2	Plac8l1		PREDICTED: Mus musculus PLAC8-like 1 (Plac8l1), mRNA.	-1.08842	0.106025	-1.14686	0.0766247	-1.16042	0.141018		-1.00977	0.132035	-1.17856	0.0573071	-1.0548	0.117947
ILMN_1215536	AK087467	E130301F21Rik			-1.01233	0.0223896	-1.25029	0.0343436	-1.58731	0.143759		-1.08171	0.070727	-1.26618	0.0662871	-1.34997	0.172492
ILMN_1215537	NM_177580.3	Baiap2l2	BC048937; MGC56984	Mus musculus BAI1-associated protein 2-like 2 (Baiap2l2), mRNA.	-1.01144	0.0395941	-1.13467	0.116047	-1.06552	0.14537		-1.0511	0.0836595	-1.26371	0.0299451	-1.12729	0.124967
ILMN_1215541	NM_027301.3	Rdh20	Rdhs; 1810054F20Rik; SDR-O	Mus musculus retinol dehydrogenase 20 (Rdh20), mRNA.	-1.10514	0.0465307	-2.40845	0.143866	-3.46583	0.0338825		-1.38619	0.256709	-3.43838	0.0515645	-3.09631	0.0641222
ILMN_1215544	NM_145566.1	Hrbl	RABR; MGC7148; A630095P14Rik; MGC61203	Mus musculus HIV-1 Rev binding protein-like (Hrbl), transcript variant 1, mRNA.	-1.09475	0.0516376	-1.1941	0.107058	-1.01529	0.264869		-1.29704	0.0192605	-1.38682	0.0312508	-1.34908	0.110494
ILMN_1215546	NM_013479.1	Bcl2l10	Diva; AA420380; C85687; AU023065; Boo	Mus musculus Bcl2-like 10 (Bcl2l10), mRNA.	-1.05578	0.0695975	1.0343	0.0935065	1.04927	0.145864		1.05698	0.0583	-1.02893	0.0618297	-1.12001	0.258966
ILMN_1215548	NM_177073.5	Relt	Tnfrsf19l; E430021K24Rik	Mus musculus RELT tumor necrosis factor receptor (Relt), mRNA.	1.01211	0.114182	-1.01106	0.0336988	-1.13027	0.182153		1.04771	0.0428522	1.0228	0.0358042	1.05544	0.0895657
ILMN_1215550	NM_010567.1	Inppl1	SHIP2; 51C	Mus musculus inositol polyphosphate phosphatase-like 1 (Inppl1), mRNA.	1.08543	0.0678617	1.57622	0.129308	1.42625	0.183174		1.03495	0.467732	1.34552	0.266169	1.2449	0.598941
ILMN_1215551	NM_021376.1	Pmp47			-1.01348	0.0739078	-1.09326	0.0795417	1.06805	0.367848		-1.01414	0.0630256	1.01083	0.108985	1.04612	0.0709709
ILMN_1215552	NM_033648.1	Fxyd4	Chif; MGC107631; 0610008I02Rik; AI267073	Mus musculus FXYD domain-containing ion transport regulator 4 (Fxyd4), mRNA.	-1.06112	0.18883	-1.13667	0.0817979	-1.23045	0.13583		-1.0028	0.17292	-1.04968	0.115411	1.04841	0.144046
ILMN_1215558	NM_028513.2	Actrt2	Arpm2; Arp-T2; 1700052K15Rik	Mus musculus actin-related protein T2 (Actrt2), mRNA.	-1.00862	0.0980726	1.07474	0.0843848	-1.01429	0.0878703		-1.03602	0.14721	1.00463	0.0851704	-1.0931	0.0484897
ILMN_1215559	NM_001081147.1	Oxtr	OTR	Mus musculus oxytocin receptor (Oxtr), mRNA.	-1.11326	0.143842	-1.15825	0.0192759	-1.15021	0.125604		-1.01468	0.0537685	-1.06929	0.0834256	1.04727	0.126426
ILMN_1215564	NM_019486.1	Olfr71	MOR262-4; mOR17	Mus musculus olfactory receptor 71 (Olfr71), mRNA.	1.10247	0.163516	-1.04571	0.116313	-1.10622	0.0556306		-1.09161	0.159584	-1.19195	0.110287	-1.22493	0.0644054
ILMN_1215566	XM_357482.1	LOC384199			1.13069	0.168138	1.13374	0.120505	1.0398	0.131122		1.05576	0.0730799	-1.01714	0.0856651	1.08813	0.125842
ILMN_1215568	AK043768	A830030L24Rik			1.04197	0.173928	1.03449	0.144006	-1.04655	0.0884315		-1.12673	0.0376415	-1.12075	0.0870168	-1.01293	0.0612414
ILMN_1215571	AK051725	D130067M12Rik			-1.04829	0.110104	-1.09931	0.129552	-1.1227	0.0929037		-1.13969	0.0526855	-1.25023	0.0246978	-1.19854	0.076516
ILMN_1215572	NM_001005510.2	Syne2	Nesp2g; NUA; AW546258; mKIAA1011; MGC96690; 6820443O06Rik; D12Ertd777e	Mus musculus synaptic nuclear envelope 2 (Syne2), mRNA.	-1.04873	0.0563649	-1.0901	0.0808754	-1.10269	0.0707021		-1.08484	0.100565	-1.08292	0.0862329	-1.07619	0.019828
ILMN_1215576	AK040585	A430107N10Rik			-1.00102	0.156644	1.00593	0.117564	-1.06174	0.134853		1.0873	0.171891	1.0689	0.119425	1.08174	0.22116
ILMN_1215580	NM_011120.1	Prl7d1	PLF-RP; PRP; Plfr; MGC117676	Mus musculus prolactin family 7, subfamily d, member 1 (Prl7d1), mRNA.	1.00791	0.0564569	-1.07002	0.0591283	1.05395	0.0936222		1.08361	0.147039	-1.11426	0.0643146	-1.03717	0.109083
ILMN_1215582	AK082530	Rasa2			-1.05795	0.105057	1.00225	0.146885	1.08029	0.140554		1.03927	0.112902	1.02215	0.0630642	1.07204	0.079658
ILMN_1215583	XM_906050.2	4930534P07Rik		PREDICTED: Mus musculus RIKEN cDNA 4930534P07 gene (4930534P07Rik), mRNA.	1.07343	0.0537449	-1.03728	0.150479	1.00812	0.115016		1.02284	0.0922281	-1.03211	0.0382296	-1.10058	0.129044
ILMN_1215584	AK011775	Mrpl15			-1.43349	0.0706528	-1.94588	0.135477	-1.76244	0.0919573		-1.36575	0.195357	-2.14693	0.0710811	-1.77903	0.0611461
ILMN_1215591	AK053371	E130012G03Rik			1.00505	0.206143	-1.10037	0.102441	-1.09486	0.189578		-1.02993	0.0701005	-1.07538	0.0465903	1.02829	0.0478236
ILMN_1215592	NM_033079.1	D6Mm5e		Mus musculus DNA segment, Chr 6, Miriam Meisler 5, expressed (D6Mm5e), mRNA.	-1.00147	0.090455	1.1631	0.0901716	1.10089	0.0200629		1.22228	0.107334	1.11816	0.0478202	1.00143	0.239247
ILMN_1215595	NM_146796.1	Olfr1499	MOR211-2	Mus musculus olfactory receptor 1499 (Olfr1499), mRNA.	-1.00113	0.0706698	1.11799	0.244926	-1.07937	0.10135		1.01378	0.0623756	-1.23431	0.0832573	-1.16612	0.127383
ILMN_1215596	NM_020601	Tbl1x			-1.00157	0.0813761	-1.26295	0.0667674	-1.32852	0.14518		-1.278	0.0380645	-1.4483	0.0698868	-1.4436	0.127403
ILMN_1215599	NM_178737.5	AW551984	3222402N16	Mus musculus expressed sequence AW551984 (AW551984), mRNA.	-1.02399	0.0629169	1.05036	0.0429846	-1.02901	0.186722		1.07448	0.129577	1.07327	0.0361235	1.12101	0.0934782
ILMN_1215600	NM_001033346.2	Lrrc55	A330097E02Rik; Gm351	Mus musculus leucine rich repeat containing 55 (Lrrc55), mRNA.	1.01537	0.0274091	-1.08967	0.0300724	-1.00944	0.165117		-1.03096	0.113019	-1.15477	0.103044	-1.16097	0.00801262
ILMN_1215601	XR_004725.1	LOC675056		PREDICTED: Mus musculus similar to SKD1 (LOC675056), misc RNA.	-1.10669	0.0631694	-1.20546	0.0378544	-1.15615	0.0206806		-1.01648	0.114194	-1.04072	0.127332	-1.18186	0.0990445
ILMN_1215602	NM_001026211.1	Dnajc19	1810055D05Rik; AA959924; Tim14	Mus musculus DnaJ (Hsp40) homolog, subfamily C, member 19 (Dnajc19), transcript variant 2, mRNA.	-1.06478	0.0954626	-1.3578	0.0139294	-1.49634	0.0806037		1.15473	0.289081	-1.28112	0.0623843	-1.1268	0.213392
ILMN_1215606	NM_021337.2	Skiv2l	Ski2w; SKI; Ddx13; AW214248; 4930534J06Rik	Mus musculus superkiller viralicidic activity 2-like (S. cerevisiae) (Skiv2l), mRNA.	-1.08087	0.144809	-1.36142	0.164058	-1.03462	0.152829		-1.2592	0.126702	-1.18356	0.0707836	-1.08108	0.132327
ILMN_1215608	XM_356083.1	LOC382013			-1.13115	0.0435663	-1.22124	0.0530089	-1.10259	0.0662364		-1.02896	0.12728	-1.09843	0.0853014	-1.00812	0.0668891
ILMN_1215610	NM_029851.2	Dync2h1	D330044F14Rik; AI448217; DHC1b; mKIAA1997; Dnchc2; 4432416O06Rik; DHC2; D030010H02Rik	Mus musculus dynein cytoplasmic 2 heavy chain 1 (Dync2h1), mRNA.	-1.06292	0.0443865	-1.01143	0.11662	-1.06693	0.0756662		-1.02963	0.0625854	-1.07135	0.131147	-1.03189	0.0351395
ILMN_1215612	NM_001085514.1	1700101E01Rik	Gm823	Mus musculus RIKEN cDNA 1700101E01 gene (1700101E01Rik), mRNA.	-1.05513	0.0662532	-1.09531	0.0791096	-1.13177	0.0874167		1.0225	0.0531303	-1.09289	0.0228033	-1.09756	0.0608706
ILMN_1215624	NM_022427.1	Gpr88	Strg; AW061286	Mus musculus G-protein coupled receptor 88 (Gpr88), mRNA.	-1.03932	0.044082	1.46068	0.161443	1.64622	0.338159		1.05495	0.412931	1.80931	0.486362	1.7502	0.13947
ILMN_1215627	XM_142894.2	LOC236356			1.01958	0.0917225	1.02451	0.15669	1.0094	0.148476		-1.07205	0.0440463	-1.11646	0.0779507	-1.18182	0.114531
ILMN_1215630	AK041909	A630046H09Rik			-1.13029	0.0866745	-1.13292	0.120824	-1.06852	0.106712		-1.04535	0.084741	-1.10324	0.041969	-1.0437	0.0176518
ILMN_1215632	NM_010807.3	Marcksl1	Macs3; F52; AL022768; D4Bc1; Macs-2; AW215397; MacMARCKS; Macs-3; Mrp; Macs2; AW536807; Mlp	Mus musculus MARCKS-like 1 (Marcksl1), mRNA.	1.5544	0.12622	2.61243	0.123003	1.85115	0.320714		1.59197	0.652479	1.92028	0.599963	1.3772	0.438124
ILMN_1215633	AK042445	A630092F18Rik			-1.0039	0.137062	-1.10154	0.147958	-1.2142	0.147858		-1.0078	0.200409	-1.21407	0.0741469	-1.03328	0.0499064
ILMN_1215638	NM_013632.3	Pnp1	AL024301; Np-2; Np; Np-1; AU015798	Mus musculus purine-nucleoside phosphorylase 1 (Pnp1), mRNA.	-1.01549	0.157148	-1.16704	0.0463453	-1.09782	0.152404		-1.00323	0.0877449	-1.04716	0.134106	-1.09968	0.0193364
ILMN_1215639	NM_144514.2	Commd1	AI256843; U2/Mu; Murr1	Mus musculus COMM domain containing 1 (Commd1), mRNA.	-1.01831	0.255969	-1.37459	0.273046	-1.02963	0.328203		-1.13555	0.172942	-1.15815	0.0749656	-1.11881	0.164817
ILMN_1215640	XM_356562.1	LOC382547			1.02587	0.109835	-1.079	0.0597348	-1.03096	0.126302		-1.12507	0.106884	-1.07765	0.042609	-1.11669	0.0301968
ILMN_1215644	XR_032896.1	LOC100047634		PREDICTED: Mus musculus similar to Eukaryotic translation initiation factor 2 alpha kinase 3 (LOC100047634), misc RNA.	1.20817	0.397729	1.411	0.420763	1.51388	0.609767		-1.08074	0.437854	1.72813	0.172355	1.81743	0.544723
ILMN_1215647	NM_023431.5	Mum1	9430059D04Rik; 2610019J09; UBE-1C2	Mus musculus melanoma associated antigen (mutated) 1 (Mum1), mRNA.	1.05899	0.138911	1.19675	0.0643748	1.23876	0.178196		1.00016	0.205127	1.12779	0.113036	1.05542	0.432932
ILMN_1215649		C230075M21Rik			1.1793	0.106618	1.84866	0.234193	1.60104	0.410525		1.28348	0.350035	1.91135	0.128512	1.66376	0.479377
ILMN_1215651	NM_007671.2	Cdkn2c	INK4c; p18INK4c; INK4d; p18; C77269	Mus musculus cyclin-dependent kinase inhibitor 2C (p18, inhibits CDK4) (Cdkn2c), mRNA.	1.04797	0.167533	-1.28566	0.117072	1.16862	0.215458		1.1694	0.158483	-1.15592	0.00955625	-1.12533	0.223826
ILMN_1215653	AK036614	9830141J12Rik			-1.01795	0.24462	1.04593	0.21264	1.05848	0.207607		1.03197	0.0828514	-1.05933	0.0730074	-1.01269	0.0701162
ILMN_1215654	AK052911	D830037I21Rik			1.00334	0.203122	1.06057	0.164229	1.01066	0.0937708		1.01359	0.00561037	-1.17577	0.0772687	-1.00279	0.0482848
ILMN_1215657	NM_146198.2	Slc5a11	MGC25910; RKST2; Kst1; Slc5a10; SMIT2; 2010013B02Rik	Mus musculus solute carrier family 5 (sodium/glucose cotransporter), member 11 (Slc5a11), mRNA.	1.04507	0.0775665	1.03576	0.114427	1.05114	0.0374611		1.08283	0.0814707	-1.0782	0.119847	1.09511	0.0642819
ILMN_1215660	AK030508	Dmtf1			-1.06299	0.192957	-1.11551	0.106397	-1.13906	0.0828635		-1.01298	0.0798367	-1.03711	0.142104	-1.16475	0.114606
ILMN_1215661	NM_009422.2	Traf2	AI325259	Mus musculus Tnf receptor-associated factor 2 (Traf2), mRNA.	1.052	0.118008	1.17155	0.0879208	1.44752	0.108659		1.17188	0.0282511	1.15705	0.111887	1.24667	0.455355
ILMN_1215663	AK090167	G630009F03Rik			1.03924	0.0294877	-1.02073	0.0461211	1.02501	0.0818007		1.01039	0.0419517	-1.05159	0.0546215	1.05231	0.130708
ILMN_1215665	AK015318	4933425K02Rik			-1.01509	0.0519559	1.00881	0.128806	-1.03905	0.129802		1.13279	0.217119	1.00372	0.107873	1.04104	0.123862
ILMN_1215666	XM_110186.2	LOC268939			1.02147	0.0761489	-1.07319	0.0551796	1.01056	0.0854073		1.08941	0.133216	1.06145	0.162924	1.00215	0.0448232
ILMN_1215670	NM_027238.2	1810054D07Rik	AI450603; RP23-17O21.2; AW215585; AV103077; 9130422G05Rik	Mus musculus RIKEN cDNA 1810054D07 gene (1810054D07Rik), mRNA.	-1.07918	0.0166296	-1.14328	0.103222	-2.06759	0.225692		1.10926	0.321475	-1.0108	0.185356	1.01106	0.425761
ILMN_1215673	NM_010031.2	Defa1	Defcr; Defcr1; cryptdin-1	Mus musculus defensin, alpha 1 (Defa1), mRNA.	1.02057	0.0764849	1.00591	0.156824	-1.10021	0.157519		1.06242	0.118931	-1.04129	0.108725	1.04959	0.142256
ILMN_1215675	AK018386	8430406H22Rik			-1.02349	0.153047	-1.04313	0.0661762	-1.04992	0.160976		-1.01214	0.0420968	1.01696	0.107404	1.0163	0.0755101
ILMN_1215677	NM_011482.2	Ssfa1			-1.11885	0.130416	-1.08082	0.0426808	-1.06389	0.0150996		-1.14457	0.102613	-1.10515	0.0324597	-1.0447	0.00922518
ILMN_1215679	NM_021529.3	Ppp2r3c	G5pr; G4-1; 5730412A08Rik; 4930511A21Rik	Mus musculus protein phosphatase 2, regulatory subunit B'', gamma (Ppp2r3c), mRNA.	1.01178	0.0837905	-1.09938	0.0443338	-1.04782	0.0674436		1.11163	0.119996	-1.13757	0.0459838	-1.07432	0.0616597
ILMN_1215680	NM_001013766.2	Samd3	Gm623	Mus musculus sterile alpha motif domain containing 3 (Samd3), transcript variant 1, mRNA. XM_919386	1.10618	0.18035	-1.01	0.0876787	-1.03083	0.10215		1.00614	0.0275994	-1.15988	0.150457	-1.07125	0.149878
ILMN_1215681	NM_007590.3	Calm3	R75142; CaMA	Mus musculus calmodulin 3 (Calm3), mRNA.	1.12913	0.0751146	1.24097	0.362195	1.60827	0.12136		1.14599	0.131205	1.77513	0.33019	1.37435	0.427261
ILMN_1215688	NM_207571.2	Olfr1355	MOR139-6; GA_x5J8B7W4DUT-12263-11330	Mus musculus olfactory receptor 1355 (Olfr1355), mRNA.	-1.02629	0.0725202	1.09393	0.126938	-1.03333	0.0523662		-1.07539	0.146798	-1.23504	0.208349	-1.17761	0.0956975
ILMN_1215689	AK037910	A130062D16Rik			1.16806	0.0933719	2.24735	0.129045	2.25005	0.210495		1.25887	0.843712	1.95271	0.454205	1.84853	0.514178
ILMN_1215692	NM_025945.2	Polr3d	BN51T; 44kDa; TSBN51; AI326118; RPC4; 2810426M17Rik; AW489084	Mus musculus polymerase (RNA) III (DNA directed) polypeptide D (Polr3d), mRNA.	-1.0144	0.143043	1.20645	0.0677513	1.423	0.310706		-1.05105	0.246482	-1.00668	0.207023	1.1293	0.162618
ILMN_1215693	XM_924614.1	EG434078		PREDICTED: Mus musculus predicted gene, EG434078 (EG434078), mRNA.	-1.1999	0.0455203	-1.61528	0.0993336	-1.33447	0.0796796		-1.15583	0.155257	-1.41798	0.0694774	-1.52341	0.0333216
ILMN_1215695	NM_001085541.1	LOC626995		Mus musculus novel protein similar to the preferentially expressed antigen in melanoma like (Pramel) family (LOC626995), mRNA.	1.122	0.0725875	1.02578	0.045353	1.11891	0.0798429		1.0299	0.0478758	1.03756	0.142083	1.11039	0.122453
ILMN_1215701	NM_207531.2	Agr3	BCMP11; E030025L21Rik; Gm888	Mus musculus anterior gradient homolog 3 (Xenopus laevis) (Agr3), mRNA.	1.04509	0.0698675	1.10444	0.121775	1.00005	0.19081		-1.02033	0.110432	1.01323	0.0528994	1.15405	0.121027
ILMN_1215703	NM_080635.1	Eif3h	EIF3-P40; MGC107627; EIF3-gamma; Eif3s3; 9430017H16Rik; 40kD; 1110008A16Rik	Mus musculus eukaryotic translation initiation factor 3, subunit H (Eif3h), mRNA.	1.01979	0.289233	-1.16431	0.19015	1.20554	0.51826		-1.32981	0.159652	-1.06407	0.126739	-1.2004	0.214755
ILMN_1215706	XM_917820.1	LOC215539		PREDICTED: Mus musculus similar to catenin, alpha 2 (LOC215539), mRNA.	-1.1274	0.123115	-1.23484	0.180159	-1.08363	0.075378		-1.03913	0.0844563	-1.02823	0.0673878	-1.07399	0.0841381
ILMN_1215710		1700025K24Rik			-1.06178	0.0882467	-1.01259	0.0849408	1.03212	0.184729		-1.03705	0.151394	-1.14309	0.0873072	-1.04331	0.0595931
ILMN_1215711	XM_357852.1	LOC384766			-1.15275	0.0600295	-1.13674	0.0480286	-1.28595	0.0430544		-1.0045	0.116492	1.00597	0.146278	-1.11371	0.113703
ILMN_1215713	NM_020596.2	Egr4	NGF1-C; NGFI-C; pAT133; NGFIC	Mus musculus early growth response 4 (Egr4), mRNA.	1.03734	0.108174	-1.11549	0.0392171	1.03452	0.0226029		1.02232	0.036593	1.03779	0.11817	-1.09016	0.154044
ILMN_1215717	AK032896	Nap1l1			1.03187	0.200758	1.18151	0.0391279	1.0795	0.282507		-1.18849	0.402922	-1.09401	0.40193	1.1176	0.261481
ILMN_1215722	NM_028031.1	Zdhhc13	Hip14l; C530010M18; HIP3RP; 2410004E01Rik	Mus musculus zinc finger, DHHC domain containing 13 (Zdhhc13), mRNA.	1.01205	0.0877753	1.07588	0.19369	-1.02675	0.157449		-1.00436	0.244025	1.35481	0.206266	-1.01859	0.177159
ILMN_1215724	NM_009633.3	Adra2b	alpha2B; alpha2-C2; [a]2B; Adra-2b	Mus musculus adrenergic receptor, alpha 2b (Adra2b), mRNA.	-1.02566	0.0512652	-1.02813	0.174917	1.01909	0.0543227		-1.21854	0.0933246	-1.09313	0.106053	-1.19941	0.218848
ILMN_1215733	NM_023149.2	Cndp2	0610010E05Rik; Pep1; C76600; Pep-1; Cn2; Dip-2	Mus musculus CNDP dipeptidase 2 (metallopeptidase M20 family) (Cndp2), mRNA.	1.14942	0.213628	1.25327	0.296923	1.09333	0.0630553		-1.00122	0.185532	1.16169	0.279119	1.00999	0.205052
ILMN_1215737	NM_178020.2	Hyal3		Mus musculus hyaluronoglucosaminidase 3 (Hyal3), mRNA.	-1.22148	0.0565772	-1.10472	0.0555268	-1.15651	0.112406		1.00167	0.115259	1.02869	0.123188	-1.12021	0.110408
ILMN_1215738	NM_023646.3	Dnaja3	1810053A11Rik; C81173; Tid1l; Tid-1; 1200003J13Rik	Mus musculus DnaJ (Hsp40) homolog, subfamily A, member 3 (Dnaja3), mRNA.	1.18161	0.197039	-1.02281	0.16508	-1.04302	0.00785543		-1.04724	0.0817169	-1.02237	0.0682361	-1.01458	0.031504
ILMN_1215740	NM_009557.3	Zfp46	AI426962; Zfp-46	Mus musculus zinc finger protein 46 (Zfp46), mRNA.	1.09571	0.159138	1.61952	0.0405228	1.65368	0.0539375		1.22685	0.451983	1.61896	0.160065	1.41934	0.511049
ILMN_1215748	XM_129516.5	mKIAA0250			-1.02029	0.110189	-1.05392	0.0863389	-1.13309	0.0953461		-1.05338	0.054442	-1.05025	0.0944752	-1.03522	0.151216
ILMN_1215755	NM_153419.1	Grwd1	A301; WDR28; GRWD; AI504353	Mus musculus glutamate-rich WD repeat containing 1 (Grwd1), mRNA.	-1.02677	0.142689	1.5545	0.236021	1.45991	0.156325		-1.31359	0.526633	1.20457	0.324893	1.32425	0.496588
ILMN_1215758	XM_354855.1	LOC380947			-1.07568	0.145456	-1.0048	0.0699174	-1.06826	0.129253		1.06385	0.107229	1.04755	0.0808573	1.07512	0.0176544
ILMN_1215761	NM_019648.3	Metap2	AU014659; Amp2; AI047573; Mnpep; A930035J23Rik; p67eIF2; MGC102452; AL024412; p67	Mus musculus methionine aminopeptidase 2 (Metap2), mRNA.	1.04048	0.0499204	-1.01246	0.0909354	-1.04657	0.126227		1.03595	0.187764	-1.02563	0.0887479	1.00012	0.119069
ILMN_1215762	AK085093	Xrcc2			1.01683	0.0800051	1.02248	0.109589	1.09586	0.179343		1.04951	0.0546843	1.06976	0.153284	1.07354	0.0887615
ILMN_1215766	XM_919231.2	Mpp7		PREDICTED: Mus musculus membrane protein, palmitoylated 7 (MAGUK p55 subfamily member 7), transcript variant 10 (Mpp7), mRNA.	1.04601	0.061353	1.10582	0.216077	1.14112	0.209167		-1.02521	0.080115	-1.00334	0.112621	1.0472	0.0791856
ILMN_1215768	NM_024182.4	Riok3	Sudd; D18Ertd331e; 1200013N13Rik; E130306C24Rik	Mus musculus RIO kinase 3 (yeast) (Riok3), mRNA.	-1.05379	0.0805806	1.21864	0.152209	-1.07289	0.0594592		-1.036	0.192783	1.0325	0.121047	-1.02269	0.155303
ILMN_1215772	NM_025901.3	Polr3k	C11; 1500004O14Rik; RPC10; 12.3kDa; RPC11; AI196849; AU014893	Mus musculus polymerase (RNA) III (DNA directed) polypeptide K (Polr3k), mRNA.	1.10305	0.0445451	-1.13287	0.0725981	-1.6182	0.0679961		1.10786	0.191929	-1.13814	0.07964	-1.22166	0.265293
ILMN_1215779	XR_035424.1	A530021J07Rik		PREDICTED: Mus musculus Riken cDNA A530021J07 gene (A530021J07Rik), misc RNA.	1.0162	0.0559076	-1.09034	0.0926972	-1.05626	0.103025		-1.09551	0.0937313	-1.13818	0.0399821	-1.02051	0.0529543
ILMN_1215781	NM_080288.1	Elmo1	6330578D22Rik; mKIAA0281; CED-12; KIAA0281; C230095H21Rik; AI173001	Mus musculus engulfment and cell motility 1, ced-12 homolog (C. elegans) (Elmo1), transcript variant 1, mRNA.	1.24319	0.107689	1.44642	0.404869	1.3904	0.0592503		1.23226	0.0903484	1.19466	0.0806434	1.27495	0.137347
ILMN_1215783	AK028475	4631422A03Rik			1.09907	0.224505	1.17634	0.0638835	1.03944	0.0631266		1.03443	0.0103829	1.04443	0.09182	-1.00092	0.06078
ILMN_1215785	AK080820	Bcl10			1.11568	0.185527	1.02186	0.0406018	1.07135	0.0536536		1.10838	0.200808	1.0275	0.0391959	-1.04349	0.0886624
ILMN_1215791	NM_009663	Alox5ap			1.8878	0.496893	14.4911	0.289348	17.9165	4.13924		1.96773	10.4193	10.818	5.8982	6.43572	13.9044
ILMN_1215795	NM_021782.2	Il21		Mus musculus interleukin 21 (Il21), mRNA.	1.30576	0.208949	1.20189	0.188345	1.12686	0.142386		-1.03302	0.179805	-1.11415	0.216666	1.01751	0.11173
ILMN_1215796	XM_001476583.1	LOC100046608		PREDICTED: Mus musculus similar to Bcl2-like protein (LOC100046608), mRNA.	1.10776	0.0970145	1.09102	0.0713283	1.05134	0.246549		1.28726	0.0968879	1.18035	0.210367	1.23897	0.0693818
ILMN_1215797	NM_010274.2	Gpd2	AW494132; AA408484; TISP38; Gdm1; Gpdh-m; AI448216; GPDH; Gpd-m; AU021455	Mus musculus glycerol phosphate dehydrogenase 2, mitochondrial (Gpd2), nuclear gene encoding mitochondrial protein, mRNA.	1.16488	0.792697	-1.19246	0.0594842	-1.37347	0.271529		1.10611	0.382447	-1.41206	0.363351	-1.49801	0.163415
ILMN_1215803	NM_027052.3	Slc38a4	1110012E16Rik; Ata3; 1700012A18Rik; mATA3	Mus musculus solute carrier family 38, member 4 (Slc38a4), mRNA.	-1.69556	0.581584	-2.80518	0.11398	-2.07543	0.581788		-1.47175	0.341848	-3.09664	0.134764	-1.70018	0.327953
ILMN_1215805	AK046605	Fmr1			-1.07252	0.0820702	-1.02439	0.0391887	-1.1129	0.0653317		-1.00219	0.0900499	-1.02968	0.0580168	1.00596	0.0943255
ILMN_1215807	NM_028608.2	Glipr1	RTVP1; RTVP-1; mRTVP-1; 2410114O14Rik	Mus musculus GLI pathogenesis-related 1 (glioma) (Glipr1), mRNA.	1.79997	0.167826	4.48813	0.964857	4.46302	1.36704		1.39295	2.12771	4.40207	0.783093	3.06236	1.20455
ILMN_1215808	NM_146953.1	Olfr531	MGC123486; MGC123485; MOR251-3	Mus musculus olfactory receptor 531 (Olfr531), mRNA.	-1.1809	0.0235808	-1.12666	0.0187517	-1.138	0.237337		1.15647	0.191374	1.02361	0.146509	1.06405	0.0455686
ILMN_1215809	XM_357590.1	LOC384343			1.03555	0.0578308	1.02052	0.0363649	-1.07664	0.120786		-1.07203	0.0963102	-1.00065	0.137986	-1.05467	0.0738463
ILMN_1215810	NM_026902.3	Mcts1	MCT-1; 1500019M23Rik	Mus musculus malignant T cell amplified sequence 1 (Mcts1), mRNA.	-1.08966	0.0875165	-1.23184	0.0495115	-1.42047	0.087699		1.18648	0.334065	1.14484	0.348662	-1.01634	0.302702
ILMN_1215814	XR_002594.1	LOC215996		PREDICTED: Mus musculus hypothetical LOC215996 (LOC215996), mRNA.	1.05597	0.0964124	1.01237	0.0985434	-1.03331	0.0707843		-1.11976	0.0564576	-1.02732	0.0987012	-1.07619	0.0116448
ILMN_1215818	AK030267	4933439J20Rik			-1.00482	0.14026	-1.14373	0.188277	-1.24873	0.0534381		-1.00147	0.160252	1.18013	0.242817	1.07256	0.299708
ILMN_1215821	AK040611	Mrg1			-1.10146	0.0806317	-1.09205	0.097889	1.02726	0.182779		-1.17195	0.0310417	-1.17672	0.0723038	-1.16103	0.0636901
ILMN_1215822	NM_029296.1	1700001C19Rik		Mus musculus RIKEN cDNA 1700001C19 gene (1700001C19Rik), mRNA.	-1.06181	0.0390872	-1.72905	0.217502	-1.51732	0.0437122		1.05243	0.354179	-2.7669	0.107482	-1.86801	0.260767
ILMN_1215823	XM_136343.4	LOC240871			1.01025	0.0670883	-1.02187	0.0541617	-1.14346	0.169554		-1.02847	0.091061	-1.08581	0.0783904	-1.02922	0.0776768
ILMN_1215824	NM_133704.3	Sec22l2			-1.12584	0.114968	-1.14797	0.044288	-1.13412	0.0510396		-1.08873	0.0720679	-1.124	0.0405558	-1.07466	0.10653
ILMN_1215825	XM_001476590.1	LOC100047316		PREDICTED: Mus musculus similar to anti-MOG Z12 variable light chain (LOC100047316), mRNA.	-1.21658	0.107564	3.73948	1.09473	6.89887	2.30415		1.05006	3.69993	7.02402	2.16727	6.72389	2.15598
ILMN_1215826	AK012522	2700077B20Rik			1.03978	0.0435293	-1.12442	0.0472329	-1.13999	0.0438539		-1.08171	0.072645	-1.26131	0.1132	-1.07865	0.0874884
ILMN_1215828	NM_146695.1	Olfr1469	MOR202-11	Mus musculus olfactory receptor 1469 (Olfr1469), mRNA.	-1.12368	0.0528183	-1.03671	0.150469	-1.06862	0.135124		-1.05339	0.0516916	-1.15869	0.0891746	1.04037	0.0989156
ILMN_1215829	AK050392	Crp			-1.00523	0.0131831	1.01325	0.0922179	1.1954	0.311204		1.06499	0.169606	1.10692	0.150895	1.20889	0.162213
ILMN_1215830	NM_001039710.1	Coq10b	1700030I21Rik; AW742641; AV002237; 9530077A17Rik; 1500041J02Rik	Mus musculus coenzyme Q10 homolog B (S. cerevisiae) (Coq10b), transcript variant 1, mRNA.	-1.05432	0.028016	-1.09508	0.0405627	-1.22464	0.169405		-1.06384	0.0444639	-1.03853	0.145799	1.00747	0.0439675
ILMN_1215831	AK051713	D130067E14Rik			-1.04	0.0273203	-1.08396	0.108495	-1.03104	0.156558		1.01217	0.107881	-1.20624	0.0162695	1.01536	0.00166115
ILMN_1215832	NM_001081391.1	Csmd3	mKIAA1894; 4930500N14Rik	Mus musculus CUB and Sushi multiple domains 3 (Csmd3), mRNA.	-1.10273	0.102216	-1.02088	0.0108017	1.02945	0.0906227		1.05182	0.0542048	-1.0156	0.0519406	1.09333	0.124719
ILMN_1215835	AJ300828	Kir4.2			-1.06872	0.0491123	-1.01906	0.0707779	-1.05426	0.0230846		1.07322	0.0926231	1.08159	0.171831	-1.0361	0.0536122
ILMN_1215837	AK051458	D130050A01Rik			-1.14569	0.0894989	-1.11902	0.11777	-1.11028	0.0922068		-1.01035	0.118812	-1.15468	0.0695241	-1.10412	0.0766219
ILMN_1215840	XM_142043.2	LOC213449			1.05175	0.0265272	-1.04556	0.0675593	1.02455	0.0720676		-1.03797	0.0209241	-1.10028	0.0835118	1.06965	0.100125
ILMN_1215842	AK006732	Emb			-1.00343	0.119155	-1.12912	0.128058	-1.2276	0.106495		-1.03115	0.132024	-1.05115	0.0489867	1.06999	0.198257
ILMN_1215843	XM_357597.1	LOC384359			1.05182	0.0465333	1.04058	0.0573886	1.05394	0.0659268		-1.10117	0.0869383	-1.04575	0.0881645	-1.0248	0.061177
ILMN_1215845	XM_355946.1	LOC381925			-1.06041	0.0753639	-1.14005	0.102127	-1.07072	0.0981929		-1.03408	0.124695	-1.02795	0.0945373	1.02582	0.118854
ILMN_1215847	NM_010277	Gfap			-1.08012	0.0113227	-1.00302	0.057707	1.16744	0.139223		-1.05233	0.0396525	-1.01813	0.112786	-1.00384	0.198273
ILMN_1215848	XM_126677.7	Dnahc17		PREDICTED: Mus musculus dynein, axonemal, heavy chain 17 (Dnahc17), mRNA.	-1.05579	0.0878312	-1.02229	0.0959286	1.05899	0.0813788		1.00527	0.0186911	1.00525	0.117632	-1.02693	0.157142
ILMN_1215849	NM_028906.2	Dpp8	2310004I03Rik; 4932434F09Rik; AI666706	Mus musculus dipeptidylpeptidase 8 (Dpp8), mRNA.	-1.0166	0.110604	1.46831	0.110256	1.31094	0.0653166		1.09647	0.244548	1.50084	0.0570489	1.61057	0.450191
ILMN_1215854	NM_013592.2	Matn4	matrilin-4	Mus musculus matrilin 4 (Matn4), mRNA.	-1.09836	0.0579534	-1.1666	0.0452641	-1.15929	0.0519485		-1.18717	0.039844	-1.0901	0.0625386	-1.06331	0.0964132
ILMN_1215857	AK051703	D130066L18Rik			1.09755	0.0607813	1.11201	0.0616814	1.18635	0.19514		1.0265	0.149517	1.12365	0.0538749	1.01094	0.106826
ILMN_1215859	NM_009244.4	Serpina1b	Spi1-2; Dom2; D12Ucla2; PI2	Mus musculus serine (or cysteine) preptidase inhibitor, clade A, member 1b (Serpina1b), mRNA.	-1.08901	0.0969364	-1.0924	0.0398946	-1.06987	0.0762612		1.08174	0.0964102	-1.00723	0.0791545	1.07524	0.144946
ILMN_1215860	XM_001479162.1	LOC100047603		PREDICTED: Mus musculus similar to Discs, large homolog 1 (Drosophila), transcript variant 1 (LOC100047603), mRNA.	-1.09089	0.0393393	-1.11204	0.0999157	-1.05627	0.0943813		-1.06159	0.0716097	-1.18271	0.0411048	-1.18865	0.10229
ILMN_1215862	NM_008599.3	Cxcl9	BB139920; Scyb9; crg-10; Mig; CMK	Mus musculus chemokine (C-X-C motif) ligand 9 (Cxcl9), mRNA.	13.1499	4.078	4.1144	1.70658	2.47005	0.774899		13.2469	5.36453	5.29094	1.45501	2.53632	1.11815
ILMN_1215870	XM_112439.2	LOC243998			-1.04598	0.0994649	-1.12835	0.0563096	-1.13376	0.196413		-1.04893	0.0858605	-1.09852	0.0688281	-1.09606	0.0325921
ILMN_1215877	NM_019578	Extl1			-1.09643	0.213458	-1.41388	0.27293	-1.56758	0.0502777		1.1304	0.2833	-2.27599	0.113637	-1.46868	0.0810877
ILMN_1215878	NM_028628.2	Lce1l	AI415426; 1110008K04Rik	Mus musculus late cornified envelope 1L (Lce1l), mRNA.	-1.01469	0.14029	1.0234	0.107937	-1.14078	0.073653		1.01108	0.0611582	-1.03989	0.0830325	-1.1155	0.00870431
ILMN_1215879	NM_138674.2	Pkhd1l1	PKHDL1; AB055648	Mus musculus polycystic kidney and hepatic disease 1-like 1 (Pkhd1l1), mRNA.	-1.15432	0.139051	-1.07208	0.0821144	-1.1725	0.02722		-1.01738	0.0502165	-1.12627	0.125124	-1.07576	0.0765372
ILMN_1215883	NM_177698.3	Psd3	AI661273; MGC6957; D430018P08; EFA6D; BC003498; 4931420C21Rik	Mus musculus pleckstrin and Sec7 domain containing 3 (Psd3), transcript variant 2, mRNA.	1.04757	0.00171124	1.06375	0.131717	1.20164	0.0926197		1.0295	0.0928709	1.02011	0.120623	1.04134	0.166491
ILMN_1215884	NM_001039376.1	Pde4dip	C87016; D130016K21Rik; 4732458A06Rik; KIAA0477; 9430063L05Rik; Usmg4; D3Bwg1078e; mKIAA0454	Mus musculus phosphodiesterase 4D interacting protein (myomegalin) (Pde4dip), transcript variant 1, mRNA.	-1.07745	0.147965	-1.06329	0.0725395	-1.07599	0.262742		-1.0909	0.0406083	-1.11266	0.125692	-1.04947	0.163268
ILMN_1215885	NM_029019.3	Stard6	AI644424; 4833424I06Rik; 4933429L05Rik; 1700011K09Rik; MGC107178	Mus musculus StAR-related lipid transfer (START) domain containing 6 (Stard6), mRNA.	1.08052	0.0530132	1.30084	0.0545778	1.0855	0.263382		1.07739	0.258054	1.1871	0.205576	1.06755	0.208914
ILMN_1215890	NM_133828.2	Creb1	Creb-1; AV083133; 2310001E10Rik; 3526402H21Rik; Creb	Mus musculus cAMP responsive element binding protein 1 (Creb1), transcript variant A, mRNA.	1.06667	0.0943205	1.3176	0.118234	1.07466	0.192017		1.15754	0.264922	1.30615	0.213888	1.19286	0.144381
ILMN_1215893	NM_145939.1	Alg3	D16Ertd36e; MGC36684	Mus musculus asparagine-linked glycosylation 3 homolog (yeast, alpha-1,3-mannosyltransferase) (Alg3), mRNA.	1.18362	0.0885256	1.0127	0.166094	1.02253	0.176045		1.01307	0.0435395	-1.19176	0.0765185	-1.22823	0.431778
ILMN_1215895	XM_354930.1	LOC381022			1.0484	0.156449	1.0293	0.157692	1.11307	0.051372		-1.05432	0.0627533	-1.14644	0.0818509	-1.07102	0.191033
ILMN_1215897	AK053279	Usp9x			-1.10835	0.082953	-1.16343	0.0749036	-1.16151	0.110057		1.0845	0.148057	-1.17087	0.0487394	-1.04528	0.0475893
ILMN_1215898	NM_172746.2	Hirip3	C86302; B130036O03	Mus musculus HIRA interacting protein 3 (Hirip3), mRNA.	1.04317	0.177647	1.74072	0.258449	1.3745	0.192803		1.00683	0.361343	1.80839	0.162141	1.34431	0.322902
ILMN_1215901	NM_026212.1	Agpat2	LPAAB; BSCL1; AV000834; 2510002J07Rik; LPAAT-beta; BSCL	Mus musculus 1-acylglycerol-3-phosphate O-acyltransferase 2 (lysophosphatidic acid acyltransferase, beta) (Agpat2), mRNA.	1.25235	0.0734805	1.14484	0.409496	1.08152	0.135083		-1.13673	0.0958264	-1.35255	0.0648885	-1.27907	0.423443
ILMN_1215902	AK039221	A230109H16Rik			-1.07044	0.111496	-1.11998	0.0839309	-1.1254	0.118171		-1.02365	0.0647152	-1.09068	0.0546152	-1.08873	0.0970848
ILMN_1215903	NM_007457.2	Ap1s1	AP19	Mus musculus adaptor protein complex AP-1, sigma 1 (Ap1s1), mRNA.	1.13522	0.0709275	1.46685	0.124695	1.29253	0.174847		-1.0766	0.442148	1.31928	0.23325	-1.01533	0.386854
ILMN_1215908	NM_001081417.1	Chd7	Edy; RP23-464N23.1; WBE1; Todo; Mt; Cycn; Cyn; Lda; Dz; Whi; A730019I05Rik; Obt; Flo	Mus musculus chromodomain helicase DNA binding protein 7 (Chd7), mRNA.	-1.01819	0.129046	1.10232	0.261376	1.66873	0.485243		-1.14177	0.111762	1.26283	0.114086	1.32984	0.254607
ILMN_1215909	XM_355250.1	LOC381305			1.00394	0.0181319	1.08918	0.13803	-1.07124	0.0430442		-1.07653	0.163932	-1.00311	0.121119	-1.0043	0.107222
ILMN_1215910	NM_180974.3	Foxn2	Foxn1; 6030465J18Rik; 3230402J05Rik; Fkh19; HTLF	Mus musculus forkhead box N2 (Foxn2), mRNA.	-1.00421	0.149571	1.05927	0.306097	1.05581	0.182921		-1.01984	0.0863362	1.28015	0.091355	1.03491	0.18389
ILMN_1215912	AK083120	Stra6			-1.08374	0.0659429	-1.14916	0.0333826	-1.11075	0.167377		1.02325	0.0586511	-1.03955	0.0894572	1.08601	0.0832588
ILMN_1215914	AK012186	Eif2s3y			-1.10694	0.0811049	-1.06573	0.0586854	-1.03548	0.0999635		-1.05876	0.0915427	-1.10221	0.163046	1.01874	0.0658655
ILMN_1215917	AK038865	A230069J01Rik			-1.03253	0.0402191	1.0342	0.11319	-1.08491	0.0908282		-1.0631	0.0865039	-1.15065	0.147447	-1.17795	0.0557865
ILMN_1215919	NM_198724.1	Egfl7	VE-statin; Zneu1	Mus musculus EGF-like domain 7 (Egfl7), transcript variant b, mRNA.	1.04566	0.126611	1.30866	0.252017	1.4124	0.273304		1.23909	0.0758963	1.61815	0.132889	1.48287	0.174608
ILMN_1215928	NM_011544.2	Tcf12	HEB; ME1; HTF4; HTF-4; REB; ALF1	Mus musculus transcription factor 12 (Tcf12), mRNA.	-1.16501	0.0705859	1.0645	0.358613	-1.00574	0.082435		-1.01161	0.108467	1.31258	0.0170103	1.31647	0.449584
ILMN_1215932	XM_357731.1	LOC384590			1.13687	0.101635	1.0555	0.0644911	-1.04334	0.0586403		-1.01238	0.121232	-1.01242	0.077881	-1.12803	0.0795486
ILMN_1215934	NM_025532.3	Prl2b1	PLP-K; Prlpk; RP23-142M3.5; Plpk; MGC130538; 2310047B08Rik; mPLP-K	Mus musculus prolactin family 2, subfamily b, member 1 (Prl2b1), mRNA.	1.03162	0.0795677	-1.04528	0.0336559	1.02572	0.10271		-1.00393	0.0761048	-1.02833	0.0406442	-1.03192	0.118587
ILMN_1215937	XM_359120.1	LOC386210			1.02538	0.161578	-1.04526	0.0417546	-1.09733	0.0892714		1.02206	0.0715503	-1.04743	0.0596167	-1.05706	0.0836027
ILMN_1215938	NM_028064.2	Slc39a4	1600025H15Rik; ZIP4; AWMS2; AU041686	Mus musculus solute carrier family 39 (zinc transporter), member 4 (Slc39a4), mRNA.	1.07391	0.148636	-1.06686	0.14613	-1.18398	0.115642		1.36015	0.218916	-1.1131	0.0624134	-1.36766	0.109372
ILMN_1215939		TRBV13-1_M15618_T_cell_receptor_beta_variable_13-1_213			1.07114	0.166833	-1.04475	0.0547387	-1.03228	0.089151		1.08581	0.190056	1.07853	0.145008	1.03643	0.0127833
ILMN_1215942	XM_358506.1	LOC381095			-1.11522	0.0508942	-1.02148	0.0504263	-1.10887	0.143522		1.04791	0.103799	-1.07263	0.0319474	-1.10277	0.0717009
ILMN_1215945	XM_358248.1	LOC385473			-1.03489	0.0941728	-1.22845	0.0196998	-1.04595	0.118794		-1.09524	0.0889905	-1.12723	0.0607308	-1.03273	0.0971378
ILMN_1215949	AK006654	1700040F17Rik			1.08071	0.0345878	1.03455	0.0694378	-1.09636	0.0590571		1.01123	0.085759	-1.02535	0.0272252	-1.0482	0.115965
ILMN_1215950		IGHV1S12_J00507_Ig_heavy_variable_1S12_239			-1.06294	0.152707	-1.09958	0.635925	1.16298	0.21395		1.07094	0.0852596	1.38729	0.150847	1.66589	0.920551
ILMN_1215951	NM_138315.1	Mical1	MGC27831; MICAL; Nical; MGC38321	Mus musculus microtubule associated monoxygenase, calponin and LIM domain containing 1 (Mical1), mRNA.	1.28074	0.351993	2.23707	0.198372	2.36942	0.118643		1.08514	0.812901	1.9619	0.338545	1.70469	1.44942
ILMN_1215954	NM_172467.2	Zc3hav1l	B130055L09Rik	Mus musculus zinc finger CCCH-type, antiviral 1-like (Zc3hav1l), mRNA.	-1.11669	0.081903	-1.06266	0.0154319	-1.10711	0.134645		1.10445	0.0746642	1.00168	0.0417372	-1.0052	0.00622043
ILMN_1215955	NM_009999.3	Cyp2b10	p16; Cyp2b; Cyp2b20	Mus musculus cytochrome P450, family 2, subfamily b, polypeptide 10 (Cyp2b10), transcript variant 2, mRNA.	-1.04796	0.0510753	-1.22188	0.143176	-1.39631	0.0233638		-1.08441	0.159016	-1.45749	0.0312062	-1.51508	0.0774976
ILMN_1215958	AK052914	D830039C14Rik			-1.1364	0.217298	1.03999	0.0954132	-1.09965	0.155318		-1.02089	0.108948	-1.06513	0.146045	-1.05177	0.17571
ILMN_1215961	XM_355564	Zfp292			-1.13997	0.0122603	-1.22835	0.125425	-1.00473	0.193971		-1.09336	0.12276	-1.01084	0.143732	-1.11959	0.0605117
ILMN_1215964	NM_001081231.1	Lhfpl3	A930031L14Rik	Mus musculus lipoma HMGIC fusion partner-like 3 (Lhfpl3), mRNA.	1.12713	0.0511684	1.09897	0.0846503	1.10464	0.142723		1.11131	0.0953521	1.04895	0.0943873	1.03814	0.0864631
ILMN_1215965	AK086900	Ubr1			-1.09882	0.0801746	-1.18001	0.116394	1.00795	0.124819		1.01135	0.0856041	1.02748	0.132938	1.05112	0.117368
ILMN_1215967	NM_025442.3	Alg5	AV170001; AV009521; 1500026A19Rik; AW545564; 2600005J22Rik	Mus musculus asparagine-linked glycosylation 5 homolog (yeast, dolichyl-phosphate beta-glucosyltransferase) (Alg5), mRNA.	1.02426	0.0766712	1.05282	0.19065	1.02881	0.130806		1.10103	0.078557	-1.07982	0.0908673	-1.14779	0.160639
ILMN_1215969	NM_198023.2	Rcor1	5730409O11; AU042633; mKIAA0071; D12Wsu95e; 6720480E22Rik	Mus musculus REST corepressor 1 (Rcor1), mRNA.	1.01451	0.254112	1.03173	0.125782	1.06173	0.0519964		-1.05504	0.0214404	1.14054	0.11315	1.15815	0.201942
ILMN_1215970	NM_207530.1	Osbpl1a			-1.10874	0.0919056	1.0572	0.0834405	-1.06073	0.153274		-1.00187	0.12171	-1.03405	0.137659	-1.17434	0.0132231
ILMN_1215972	NM_013681.1	Syn2	AI841723; AI836018; 2900074L19Rik	Mus musculus synapsin II (Syn2), mRNA.	1.13644	0.0611536	1.42325	0.18864	1.95407	0.650709		1.1	0.11369	1.3742	0.108765	1.32544	0.0790586
ILMN_1215974	NM_001085525.1	EG434727		Mus musculus predicted gene, EG434727 (EG434727), mRNA.	1.0044	0.0376213	1.03126	0.0333979	-1.02513	0.0849688		1.14291	0.0953931	1.07845	0.0682713	1.05879	0.0179972
ILMN_1215981	NM_201355.2	Nat14	BC047219; MGC57098	Mus musculus N-acetyltransferase 14 (Nat14), mRNA.	-1.10559	0.177723	1.0583	0.131904	1.03505	0.102255		-1.00397	0.145381	-1.00328	0.0352603	-1.02606	0.111998
ILMN_1215983	NM_177201	Phf8			-1.02339	0.171677	-1.13055	0.109129	-1.09286	0.13316		-1.02377	0.0693803	-1.00919	0.0699136	1.02963	0.0702548
ILMN_1215984	AK088317	Clcn4-2			1.09479	0.184373	-1.01744	0.114977	1.00845	0.0577834		1.00946	0.132108	-1.16997	0.0985592	-1.0438	0.0948995
ILMN_1215990	NM_001025084.2	Rhox1		Mus musculus reproductive homeobox 1 (Rhox1), mRNA.	-1.01898	0.129401	-1.12669	0.0923964	-1.06755	0.168566		-1.01657	0.0741983	-1.08465	0.0804179	1.03333	0.0880865
ILMN_1215995	XM_001477270.1	LOC100047043		PREDICTED: Mus musculus similar to enolase 1, alpha non-neuron (LOC100047043), mRNA.	1.02346	0.152397	-1.0741	0.0256994	-1.081	0.0726472		-1.00897	0.0615019	1.01194	0.0900479	-1.0946	0.0551961
ILMN_1215997	NM_028455	3110043J09Rik			-1.10612	0.103963	-1.07266	0.113856	-1.2125	0.289222		1.20493	0.194905	1.10059	0.148459	1.15594	0.0335044
ILMN_1215999	XM_358674.1	LOC381895			-1.0022	0.0581153	-1.11749	0.0970289	1.04216	0.15196		-1.1093	0.0321701	-1.00106	0.0718544	-1.08272	0.112217
ILMN_1216003	NM_153106.2	Padi6	ePAD; Padi5	Mus musculus peptidyl arginine deiminase, type VI (Padi6), mRNA.	-1.00911	0.10714	1.06435	0.0444589	-1.12632	0.0570499		1.14152	0.0457103	1.1121	0.0302702	1.01588	0.121433
ILMN_1216007	NM_026614.2	Ndufa5	2900002J19Rik	Mus musculus NADH dehydrogenase (ubiquinone) 1 alpha subcomplex, 5 (Ndufa5), nuclear gene encoding mitochondrial protein, mRNA.	-1.13895	0.106022	-1.63048	0.0100047	-1.98707	0.0996396		1.08622	0.291214	-1.46926	0.0762591	-1.59203	0.126682
ILMN_1216010	NM_146736.1	Olfr491	MOR204-11	Mus musculus olfactory receptor 491 (Olfr491), mRNA.	-1.09554	0.0353289	-1.08013	0.157374	-1.06015	0.0799947		-1.0666	0.110503	-1.25001	0.0428823	-1.19119	0.101661
ILMN_1216011	XM_357280.1	LOC383826			-1.17215	0.175842	-1.02143	0.399494	1.25698	0.497913		-1.26403	0.263933	1.07555	0.216442	1.07096	0.298974
ILMN_1216015	NM_133708.3	Gmppa	1810012N01Rik	Mus musculus GDP-mannose pyrophosphorylase A (Gmppa), mRNA.	1.12822	0.225775	1.00353	0.196525	-1.04633	0.182565		-1.09796	0.204096	-1.1506	0.0868699	-1.28921	0.299703
ILMN_1216017	XM_357266.1	LOC383806			-1.01957	0.0816991	1.03999	0.0772916	1.01633	0.114099		1.05222	0.0837004	-1.01536	0.0512343	1.05179	0.0612717
ILMN_1216020	NM_145226.2	Oas3	Oasl10	Mus musculus 2'-5' oligoadenylate synthetase 3 (Oas3), mRNA.	1.62629	0.383276	1.47624	0.763984	1.29726	0.33672		1.04267	0.492592	1.34275	0.555213	1.17015	0.561794
ILMN_1216021	NM_021324.4	Ttyh1	6330408P11Rik; tty; 4930459B04Rik	Mus musculus tweety homolog 1 (Drosophila) (Ttyh1), transcript variant 2, mRNA.	1.07313	0.0537904	1.1272	0.0232756	1.17963	0.167803		1.23598	0.0935965	1.09105	0.0934845	-1.00806	0.0434452
ILMN_1216022	AK089453	Aclp7			-1.15497	0.0132369	-1.0771	0.0350138	-1.15302	0.15062		1.16803	0.139473	1.05635	0.0917384	1.00309	0.0996149
ILMN_1216024		C030003H22Rik			-1.27501	0.0465267	-1.05716	0.255383	-1.00447	0.348547		1.07449	0.0328418	1.33956	0.15586	1.47619	0.285334
ILMN_1216028	XM_001474585.1	EG434758		PREDICTED: Mus musculus predicted gene, EG434758 (EG434758), mRNA.	-1.07714	0.0861411	-1.07006	0.0620605	-1.07929	0.13962		1.0272	0.127294	-1.07598	0.0595994	1.01853	0.0395074
ILMN_1216029	NM_024199.2	Cstf1	AI788832; 1700057K18Rik	Mus musculus cleavage stimulation factor, 3' pre-RNA, subunit 1 (Cstf1), mRNA.	-1.01468	0.0542508	1.0515	0.166225	1.01132	0.0610982		-1.16744	0.219526	-1.2492	0.198488	-1.22781	0.333511
ILMN_1216031	XM_357759.1	LOC384638			-1.06055	0.0589938	-1.09022	0.0729331	1.02135	0.0668835		1.05509	0.100064	1.06485	0.0927983	1.06503	0.0220537
ILMN_1216035	NM_153124.1	St8sia5	ST8SiaV; MGC41119; Siat8e	Mus musculus ST8 alpha-N-acetyl-neuraminide alpha-2,8-sialyltransferase 5 (St8sia5), transcript variant 2, mRNA.	-1.03298	0.0650986	1.05758	0.0668995	-1.05895	0.0356892		-1.00869	0.11177	-1.00392	0.0983956	1.04647	0.066115
ILMN_1216036	NM_053186.2	Cnnm3	Acdp3	Mus musculus cyclin M3 (Cnnm3), transcript variant 1, mRNA.	-1.00826	0.0454025	-1.03688	0.144099	1.21719	0.221596		-1.16139	0.0303768	-1.13215	0.0301813	-1.1932	0.356912
ILMN_1216042	NM_009696.2	Apoe	AI255918	Mus musculus apolipoprotein E (Apoe), mRNA.	-1.07593	0.0694582	-1.31818	0.116533	-1.13508	0.0609503		-1.08647	0.152108	-1.34392	0.0877994	-1.20477	0.091951
ILMN_1216043	XM_139430.2	LOC223628			-1.15154	0.17239	-1.10595	0.0582829	-1.18415	0.0839186		-1.10103	0.112195	-1.09724	0.0190554	-1.09045	0.0478115
ILMN_1216046	NM_178643.5	C230052I12Rik	AW538696; AW124591	Mus musculus RIKEN cDNA C230052I12 gene (C230052I12Rik), mRNA.	1.1214	0.110374	1.29049	0.115581	1.10499	0.128754		1.01997	0.102737	1.22468	0.0476258	1.03737	0.207713
ILMN_1216048	XR_033673.1	LOC232745		PREDICTED: Mus musculus similar to 60S ribosomal protein L7a (Surfeit locus protein 3) (LOC232745), misc RNA.	-1.05021	0.15153	-1.2522	0.181586	-1.03062	0.139897		-1.03686	0.214093	1.14076	0.274895	1.0059	0.307846
ILMN_1216053	AK080426	Rnf10			1.07619	0.127099	-1.08255	0.0983748	-1.04833	0.0433432		-1.09561	0.0458382	-1.11835	0.139388	-1.06312	0.0149533
ILMN_1216055	AK015790	Mscp-pending			1.01338	0.115255	1.06839	0.0998934	-1.05243	0.0239154		1.00357	0.103391	-1.02804	0.140815	-1.04826	0.103931
ILMN_1216056	XM_132808.3	2510049J12Rik		PREDICTED: Mus musculus RIKEN cDNA 2510049J12 gene, transcript variant 1 (2510049J12Rik), mRNA.	1.13022	0.0853226	1.37375	0.173524	1.19304	0.237504		1.15028	0.0900444	1.3002	0.0591725	1.41674	0.13148
ILMN_1216057	NM_010559.2	Il6ra	Il6r; IL-6R; CD126; MGC30256	Mus musculus interleukin 6 receptor, alpha (Il6ra), mRNA.	-1.17371	0.155481	-1.00754	0.12119	1.29187	0.306531		1.13787	0.306088	1.10988	0.2552	1.36884	0.227159
ILMN_1216058	XM_142493.3	LOC235921			-1.12342	0.0692228	-1.16435	0.0307096	-1.20228	0.155451		-1.15038	0.0498275	-1.10614	0.152285	-1.08129	0.0382723
ILMN_1216064	AK048771	C230057L10Rik			-1.05021	0.0470104	-1.08339	0.0593758	-1.14435	0.180021		-1.04945	0.0674148	-1.1488	0.0792082	-1.27161	0.0906563
ILMN_1216065	XM_357092.1	LOC383492			-1.04481	0.0654601	-1.07308	0.0825693	-1.0752	0.144593		1.04105	0.0465304	-1.06863	0.0604091	-1.01931	0.143604
ILMN_1216066	AK051873	Nrp2			-1.23689	0.0273874	-1.22434	0.0406716	-1.17524	0.0591591		-1.07174	0.107019	-1.12841	0.0696124	-1.15349	0.0694124
ILMN_1216068	NM_053103	Entpd7			-1.04587	0.186466	1.46484	0.0651766	1.20001	0.173797		-1.02077	0.383718	1.20933	0.270211	1.21277	0.0942493
ILMN_1216069	AK039942	BC003993			-1.04377	0.0905702	-1.0442	0.0314754	-1.02299	0.150156		-1.03437	0.134752	-1.11917	0.155541	1.03321	0.0788156
ILMN_1216071	NM_010974	Olfr242			-1.06607	0.0634981	1.009	0.0573722	-1.05035	0.0542157		1.04966	0.0662711	-1.0874	0.0774822	-1.0204	0.0225831
ILMN_1216072	NM_027000.4	Gtpbp4	NGB; Crfg; Gtpbp3; 2610028C09Rik	Mus musculus GTP binding protein 4 (Gtpbp4), mRNA.	1.14637	0.146419	1.47023	0.194954	1.063	0.0426158		1.11239	0.264635	1.48326	0.104114	1.35964	0.443184
ILMN_1216073	NM_023537.4	Rab3b			1.06947	0.0439882	1.04187	0.0757975	1.195	0.0864253		-1.0014	0.101171	-1.02126	0.0654572	1.20503	0.135798
ILMN_1216075	AK014541	Vti1-pending			1.1337	0.250167	1.00755	0.0633386	-1.09904	0.109799		1.04524	0.0444839	1.06543	0.052792	1.07397	0.162001
ILMN_1216083	AK004741	Araf			1.04895	0.0788458	-1.35601	0.122634	-1.34663	0.0284007		-1.10016	0.167117	-1.02248	0.178646	-1.24149	0.103311
ILMN_1216085	AK046455	B230387C07Rik			-1.32237	0.196092	1.20452	0.194906	-1.06074	0.430021		-1.18266	0.227477	1.28865	0.227287	1.23977	0.676999
ILMN_1216086	NM_016694.3	Park2	MGC130518; PRKN	Mus musculus parkin (Park2), mRNA.	1.24196	0.21318	1.09302	0.174512	-1.09118	0.167596		-1.07392	0.0798281	-1.16872	0.0897256	-1.17699	0.152851
ILMN_1216087	NM_147006.2	Olfr392	MOR135-9; RP23-180L15.7	Mus musculus olfactory receptor 392 (Olfr392), mRNA.	-1.03965	0.0618994	-1.07688	0.0358213	1.0202	0.122324		1.12229	0.151893	1.0774	0.135269	1.11273	0.0772444
ILMN_1216089	NM_021330.3	Acp1	Acp-1; MGC132904; LMW-PTP; MGC103115; AI427468; 4632432E04Rik	Mus musculus acid phosphatase 1, soluble (Acp1), mRNA.	-1.10013	0.0642282	-1.15351	0.110684	-1.15977	0.0380138		-1.0074	0.133458	-1.03415	0.130153	-1.04812	0.108626
ILMN_1216091	NM_145940.2	Wipi1	MGC36416; AW411817; D11Ertd498e; 4930533H01Rik	Mus musculus WD repeat domain, phosphoinositide interacting 1 (Wipi1), mRNA.	1.15339	0.23877	1.54958	0.313746	1.94976	0.587015		1.11628	0.179852	1.52014	0.190727	1.40733	0.0764246
ILMN_1216092	NM_029906.2	9530003J23Rik		Mus musculus RIKEN cDNA 9530003J23 gene (9530003J23Rik), mRNA.	1.04841	0.0938606	1.01384	0.0631084	1.01719	0.0527432		-1.05919	0.111039	-1.10008	0.13272	-1.04141	0.156143
ILMN_1216096	NM_133730.1	Krt25	mIRSa1; 4631426H08Rik; Krt25a; Ka38	Mus musculus keratin 25 (Krt25), mRNA.	1.08235	0.0926575	1.02649	0.0501656	1.09351	0.117354		-1.12518	0.0669652	-1.03308	0.189087	1.02483	0.261446
ILMN_1216097	XM_924862.2	Gm684		PREDICTED: Mus musculus gene model 684, (NCBI) (Gm684), mRNA.	-1.0906	0.158637	1.0831	0.164064	1.33361	0.138676		-1.00943	0.0879074	1.44232	0.338557	1.64852	0.329774
ILMN_1216098	XM_904306.3	Zfp746		PREDICTED: Mus musculus zinc finger protein 746 (Zfp746), mRNA.	1.20537	0.0587615	1.10004	0.227083	1.17135	0.0761123		1.01785	0.111219	-1.13827	0.142484	1.08337	0.163176
ILMN_1216099	NM_028651.2	Tmtc4	4930403J22Rik; 5730419O14Rik	Mus musculus transmembrane and tetratricopeptide repeat containing 4 (Tmtc4), mRNA.	-1.10177	0.0893559	-1.12034	0.0349349	-1.11518	0.219066		-1.22155	0.151898	-1.10101	0.0577548	-1.17144	0.0624387
ILMN_1216100	NM_022021.1	Cables1	ik3-1; Cables	Mus musculus Cdk5 and Abl enzyme substrate 1 (Cables1), mRNA.	1.04391	0.142164	-1.01108	0.0292847	-1.00792	0.334747		1.09673	0.134615	-1.0468	0.0355515	1.19002	0.119089
ILMN_1216107	AK051333	D130035M05Rik			1.03127	0.109576	1.07482	0.119196	1.16634	0.190459		1.00616	0.143534	1.01822	0.129571	1.12786	0.0865432
ILMN_1216109	XM_001479136.1	LOC100047923		PREDICTED: Mus musculus hypothetical protein LOC100047923 (LOC100047923), mRNA.	-1.11261	0.030784	-1.07352	0.0729448	-1.06064	0.0661002		-1.04787	0.023363	-1.07032	0.0285266	-1.12369	0.0779801
ILMN_1216110	NM_029529.3	Slc35d3	Frcl1; 6230421J19Rik	Mus musculus solute carrier family 35, member D3 (Slc35d3), mRNA.	-1.01747	0.112385	1.14663	0.170002	1.21087	0.213829		1.10035	0.177095	1.03741	0.14222	1.04919	0.237267
ILMN_1216116	NM_031878.1	Smarcd2	Baf60b; AW322457	Mus musculus SWI/SNF related, matrix associated, actin dependent regulator of chromatin, subfamily d, member 2 (Smarcd2), mRNA.	-1.03981	0.0377248	-1.22576	0.0478518	-1.15066	0.0813616		-1.1983	0.0215964	-1.24742	0.037831	-1.15683	0.18629
ILMN_1216117	AK029530	4921514E18Rik			1.06196	0.133509	1.02531	0.00651431	-1.32643	0.133275		-1.01615	0.0756433	-1.03914	0.125832	-1.01829	0.396202
ILMN_1216120	XM_357161.1	LOC383621			1.01123	0.0354949	-1.12099	0.0650233	-1.01483	0.062544		-1.01074	0.117954	-1.11072	0.00892523	-1.128	0.10918
ILMN_1216122	NM_198831.2	Mrpl48	D4Ertd786e; CGI-118; 1810030E20Rik; 2610028L11Rik	Mus musculus mitochondrial ribosomal protein L48 (Mrpl48), nuclear gene encoding mitochondrial protein, mRNA.	-1.20207	0.0711118	-1.36659	0.0150419	-1.39252	0.0481452		-1.16506	0.126422	-1.32418	0.0549891	-1.43692	0.0109181
ILMN_1216123	XM_357943.1	LOC384929			1.09423	0.147372	1.05682	0.0126938	1.09019	0.127778		1.16407	0.109568	1.01803	0.113136	1.00108	0.172852
ILMN_1216127	AK089240	F630101L04Rik			-1.13109	0.0204547	-1.20078	0.0876199	-1.16421	0.0607878		1.06818	0.19502	-1.00592	0.111276	-1.04922	0.0533391
ILMN_1216132	AK017701	Kpnb3			1.01798	0.102879	-1.12535	0.0139915	-1.16563	0.152207		-1.11672	0.0215378	-1.16264	0.103144	-1.00116	0.103682
ILMN_1216133	NM_183335.1	Igsf1	InhBP/p120; 5530402E03; 5330413N23; AI747649; mKIAA0364	Mus musculus immunoglobulin superfamily, member 1 (Igsf1), transcript variant 3, mRNA.	-1.07675	0.156146	-1.03634	0.0561148	-1.07097	0.0852038		-1.04365	0.0858207	-1.09221	0.0100258	1.00056	0.128388
ILMN_1216136	NM_009824.1	Cbfa2t3h	ETO-2; A630044F12Rik; MTGR2	Mus musculus core-binding factor, runt domain, alpha subunit 2, translocated to, 3 homolog (human) (Cbfa2t3h), mRNA.	1.02769	0.13097	1.64692	0.475282	1.73559	0.446866		1.37089	0.183656	2.3433	0.497389	1.71957	0.996948
ILMN_1216142	NM_010767.3	Masp2	MAp19; MASP-2	Mus musculus mannan-binding lectin serine peptidase 2 (Masp2), transcript variant 2, mRNA.	-1.03392	0.130523	-1.27322	0.207342	-1.35919	0.0654772		-1.05302	0.109313	-1.75713	0.0807357	-1.38809	0.189182
ILMN_1216143	NM_013876.3	Rnf11		Mus musculus ring finger protein 11 (Rnf11), mRNA.	-1.05466	0.300939	-1.06501	0.23209	-1.09999	0.442561		1.02516	0.249563	1.09979	0.103596	1.32163	0.518045
ILMN_1216145	AK043029	Np220			-1.00059	0.0135816	-1.01574	0.181336	1.05175	0.0753722		-1.08585	0.0591054	1.06658	0.0923861	-1.0164	0.217992
ILMN_1216149	NM_010359.1	Gstm3	AI042769; Fsc2; mGSTM5	Mus musculus glutathione S-transferase, mu 3 (Gstm3), mRNA.	-1.0206	0.0370227	-1.01862	0.0925367	1.0086	0.237477		1.28132	0.542986	-1.12482	0.154615	1.1096	0.0743817
ILMN_1216153	AK033736	9130601C02Rik			-1.00694	0.0579493	-1.04852	0.100058	1.0176	0.0302236		-1.07286	0.0448051	-1.07262	0.0384988	-1.09267	0.115831
ILMN_1216154	NM_010954.2	Ncam2			-1.04431	0.139599	-1.06639	0.0849307	-1.10665	0.100676		1.02966	0.0838721	-1.12498	0.0822619	1.02653	0.083541
ILMN_1216155	AK081580	C130046K22Rik			-1.01752	0.117871	-1.03989	0.158984	1.05574	0.196502		1.1532	0.200204	1.14039	0.185709	1.00021	0.143144
ILMN_1216167	NM_026780.3	Syf2	p29; 1110018L13Rik; RP23-79J18.4; Gcipip; mp29; Cbpin; D4Bwg1551e	Mus musculus SYF2 homolog, RNA splicing factor (S. cerevisiae) (Syf2), mRNA.	-1.018	0.121634	-1.03119	0.133026	1.01591	0.113583		-1.05043	0.144348	-1.19661	0.0571855	-1.21535	0.196044
ILMN_1216168	NM_026886.3	1500001A10Rik	B230202K19Rik; mKIAA1853	Mus musculus RIKEN cDNA 1500001A10 gene (1500001A10Rik), mRNA.	1.00321	0.193663	1.20679	0.28323	1.71958	0.694851		1.07254	0.170798	1.08297	0.231376	1.237	0.22125
ILMN_1216171	AK089630	F830005K03Rik			-1.07608	0.129572	-1.1643	0.1619	-1.05362	0.0957507		1.10427	0.187054	1.03204	0.0735679	1.0199	0.0214834
ILMN_1216174	NM_177460.3	Parp16	BC055447; MGC65335; C79952	Mus musculus poly (ADP-ribose) polymerase family, member 16 (Parp16), mRNA.	-1.03109	0.0721437	-1.41542	0.120561	-1.38971	0.137232		1.36024	0.366338	-1.14277	0.113663	-1.01369	0.108795
ILMN_1216178	NM_020295.3	Lmbr1	1110048D14Rik; AU017641	Mus musculus limb region 1 (Lmbr1), mRNA.	-1.03851	0.0423941	1.05397	0.0529267	1.01005	0.198997		1.10193	0.120007	1.05745	0.152581	1.1805	0.250768
ILMN_1216182	NM_028341.2	2810439F02Rik	1700008N02Rik	Mus musculus RIKEN cDNA 2810439F02 gene (2810439F02Rik), mRNA.	1.20752	0.200859	-1.49202	0.0895416	-1.28259	0.116778		-1.03888	0.22999	-1.03031	0.335455	-1.00225	0.193643
ILMN_1216183	NM_011336.1	Ccl27	mILC; ILC; PESKY; Ccl27b; Scya27b; Scya27; CTACK; MGC130150; ESkine; CTAK; ALP; Scya27a; Ccl27a; AW558992	Mus musculus chemokine (C-C motif) ligand 27 (Ccl27), transcript variant 1, mRNA.	-1.20145	0.0781084	-1.24733	0.0433438	-1.29869	0.0444125		-1.25772	0.0413403	-1.28397	0.0337838	-1.36663	0.0987272
ILMN_1216190	NM_009025	Rasa3			1.01686	0.0358014	1.06674	0.0511187	1.19488	0.0974675		-1.1534	0.219055	1.07201	0.113883	1.02912	0.268164
ILMN_1216191	AK037970	Lcp2			1.25848	0.286435	1.763	0.16399	1.46129	0.206244		1.15468	0.246027	1.47077	0.247387	1.24693	0.103443
ILMN_1216194	NM_001081270.1	Dscaml1	mKIAA1132; 4930435C18Rik; 4921507G06Rik; BB239540	Mus musculus Down syndrome cell adhesion molecule-like 1 (Dscaml1), mRNA.	1.0559	0.0799149	-1.01939	0.0247423	-1.05993	0.0567371		1.04458	0.027943	-1.03907	0.0337799	-1.06205	0.0204104
ILMN_1216195	AK052598	D630002J18Rik			1.03507	0.0498757	1.08603	0.0305835	1.0565	0.0214641		1.07366	0.0845299	1.06795	0.096361	1.07123	0.0869289
ILMN_1216198	NM_028198.1	Xpo5			1.28544	0.104451	1.48783	0.116469	1.66811	0.326146		-1.15257	0.533195	1.24364	0.340489	1.18428	0.314606
ILMN_1216204	NM_016776.2	Mybbp1a	AU019902; p160MBP; P160; p67MBP; AL024407	Mus musculus MYB binding protein (P160) 1a (Mybbp1a), mRNA.	1.1028	0.12016	1.19595	0.176317	1.15937	0.181352		-1.01776	0.131068	-1.05049	0.122048	-1.0664	0.179164
ILMN_1216206	NM_013909.1	Fbxl6	Fbl6; AU021795	Mus musculus F-box and leucine-rich repeat protein 6 (Fbxl6), mRNA.	1.10362	0.0967491	1.28458	0.0663684	1.55694	0.169777		-1.01561	0.175285	1.1531	0.0777076	1.10399	0.457857
ILMN_1216210	NM_153413.2	Dock3	mKIAA0299; PBP; MOCA	Mus musculus dedicator of cyto-kinesis 3 (Dock3), mRNA.	1.13911	0.110087	1.11136	0.153272	1.15174	0.300158		-1.14809	0.0765838	-1.07333	0.162446	-1.12329	0.12337
ILMN_1216211	NM_025894.2	Psmd12	P55; AI480719; 1500002F15Rik	Mus musculus proteasome (prosome, macropain) 26S subunit, non-ATPase, 12 (Psmd12), mRNA.	1.01843	0.647745	-1.27107	0.375511	-1.12528	0.559336		-1.18105	0.32241	-1.02078	0.204176	-1.00179	0.36637
ILMN_1216212	NM_010425.3	Foxd3	Hfh2; Genesis; CWH3	Mus musculus forkhead box D3 (Foxd3), mRNA.	1.04605	0.200034	-1.16838	0.218409	-1.10835	0.079805		1.05476	0.137019	1.12444	0.14333	-1.07643	0.0417209
ILMN_1216213	NM_016692.1	Incenp	AU019509; C77457; 2700067E22Rik; C130081E20	Mus musculus inner centromere protein (Incenp), mRNA.	1.80971	0.571811	4.08317	0.628408	3.6144	0.358802		1.4253	2.05661	4.06091	0.778879	2.0288	2.5953
ILMN_1216215	NM_153136.4	Nudt18	MGC38179; BC036718	Mus musculus nudix (nucleoside diphosphate linked moiety X)-type motif 18 (Nudt18), mRNA.	1.23981	0.223168	1.78868	0.372611	2.03387	0.442338		1.08355	0.548907	2.44505	0.288113	2.53823	0.242532
ILMN_1216216	AK050746	D030014N20Rik			1.02682	0.0820049	-1.03695	0.084351	-1.11333	0.0827521		1.02817	0.13962	-1.09659	0.0255658	-1.03712	0.0142857
ILMN_1216218	XM_124833.3	LOC232577			-1.0628	0.115978	-1.17482	0.04289	-1.16489	0.0956887		1.06353	0.11213	-1.01653	0.147456	1.00056	0.0722493
ILMN_1216220	XR_005345.1	A930024E05Rik		PREDICTED: Mus musculus RIKEN cDNA A930024E05 gene (A930024E05Rik), misc RNA.	1.12787	0.0352238	1.06497	0.0532428	1.05961	0.0576258		1.00491	0.0608988	1.14894	0.158434	1.11772	0.124517
ILMN_1216226	NM_172633.3	Cbln2	A730004O05; 6330593N19Rik	Mus musculus cerebellin 2 precursor protein (Cbln2), mRNA.	-1.0685	0.136514	1.05343	0.17957	-1.19244	0.10759		-1.19926	0.166749	-1.21064	0.176114	-1.15602	0.094594
ILMN_1216228	NM_007732.1	Col17a1	Bpag2; BP180; Bpag	Mus musculus collagen, type XVII, alpha 1 (Col17a1), mRNA.	1.04546	0.121603	-1.10654	0.00649285	-1.03941	0.0732298		-1.03431	0.114843	-1.19581	0.131193	-1.3117	0.131955
ILMN_1216230	XR_002277.1	LOC668978		PREDICTED: Mus musculus similar to Voltage-dependent anion-selective channel protein 1 (VDAC-1) (mVDAC1) (mVDAC5) (Outer mitochondrial membrane protein porin 1) (Plasmalemmal porin) (LOC668978), mRNA.	1.03907	0.00891994	1.00842	0.0451882	-1.01415	0.173246		1.08412	0.0571603	1.03093	0.112628	1.05255	0.0237923
ILMN_1216231	NM_001039137.2	Scoc	2810002J11Rik; AA415030; 0610011C06Rik	Mus musculus short coiled-coil protein (Scoc), transcript variant 1, mRNA.	-1.04889	0.336229	-1.34292	0.275397	-1.46549	0.241694		1.04524	0.0314588	1.08435	0.155686	1.1163	0.464673
ILMN_1216233	NM_016926.1	Sart3	AU045857; mKIAA0156	Mus musculus squamous cell carcinoma antigen recognized by T-cells 3 (Sart3), mRNA.	1.07385	0.183806	1.06208	0.145949	1.1218	0.149364		-1.20917	0.0844192	-1.16581	0.0659752	-1.04929	0.166881
ILMN_1216235	AK081226	C030013F01Rik			-1.07843	0.210965	-1.10969	0.0838212	-1.05371	0.074121		-1.00698	0.242968	-1.22608	0.0339104	-1.20745	0.168875
ILMN_1216236	AK089710	F830010D20Rik			-1.07274	0.118858	-1.09722	0.104564	-1.00221	0.0571798		1.05704	0.088807	-1.13801	0.120346	1.03995	0.185578
ILMN_1216237	XM_357097.1	LOC383503			-1.04437	0.0173102	-1.04715	0.0571896	1.03336	0.0623567		-1.02745	0.0136461	-1.06209	0.0773733	1.03395	0.0963682
ILMN_1216238	NM_026256.2	4921537P18Rik	Gsarp1; 4930456F22Rik	Mus musculus RIKEN cDNA 4921537P18 gene (4921537P18Rik), transcript variant 1, mRNA.	-1.1445	0.0919432	-1.06875	0.0366629	-1.0847	0.0750706		1.0962	0.08767	-1.08707	0.10683	-1.07847	0.0608354
ILMN_1216239	NM_001081213.1	Ermp1	mKIAA1815; D19Wsu12e; Fxna; MGC28180; D19Ertd410e	Mus musculus endoplasmic reticulum metallopeptidase 1 (Ermp1), mRNA.	1.08934	0.149827	1.33192	0.253663	1.4351	0.10033		1.13331	0.0893887	1.68645	0.216412	1.53542	0.00951912
ILMN_1216242	AK043547	A830007F11Rik			-1.09399	0.0161682	-1.11513	0.0810384	-1.14876	0.0466356		-1.03641	0.0412033	-1.0171	0.02628	-1.09552	0.146114
ILMN_1216243	NM_207573.1	Olfr1380	MGC129190; MGC129191	Mus musculus olfactory receptor 1380 (Olfr1380), mRNA.	1.03789	0.0455263	-1.06323	0.0038607	-1.02938	0.137898		1.04554	0.144936	-1.10157	0.061211	-1.14475	0.0824498
ILMN_1216247	XM_001472258.1	Nova1		PREDICTED: Mus musculus neuro-oncological ventral antigen 1, transcript variant 1 (Nova1), mRNA.	1.18308	0.0374187	1.22567	0.198543	1.02341	0.035312		-1.01066	0.182589	-1.05871	0.149145	-1.05528	0.0619239
ILMN_1216249	NM_001001805.2	Olfr576	Olfr576-ps1; MGC129202; MOR8-5	Mus musculus olfactory receptor 576 (Olfr576), mRNA.	-1.07905	0.0550034	1.01425	0.0984903	-1.08179	0.0517308		1.16435	0.12191	-1.0781	0.0709576	-1.06763	0.0241353
ILMN_1216259	AK034481	Pdk4			1.00803	0.0423739	-1.0474	0.0701109	1.00603	0.0741788		1.08287	0.140594	-1.10075	0.081007	-1.08708	0.0527719
ILMN_1216262	NM_007560.3	Bmpr1b	Acvrlk6; AI385617; CFK-43a; Alk6; AV355320; ALK-6; BMPR-IB	Mus musculus bone morphogenetic protein receptor, type 1B (Bmpr1b), mRNA.	-1.20867	0.108983	-1.28312	0.0485268	-1.21296	0.18715		1.12002	0.257715	-1.02965	0.152591	1.12475	0.198372
ILMN_1216265	NM_001081300.1	Tshz1	Tsh1; Sdccag33; teashirt1; 5730407I04Rik; D18Bwg1409e; KIAA4206; NY-CO-33; Mtsh1; mKIAA4206	Mus musculus teashirt zinc finger family member 1 (Tshz1), mRNA.	1.06624	0.0687031	-1.15387	0.0757068	-1.35534	0.0661016		-1.13365	0.0477177	-1.31367	0.0605748	-1.21281	0.130378
ILMN_1216267	AK048680	NK-1R, SPR, GPCR			-1.08151	0.0464863	-1.04229	0.092268	-1.09161	0.200296		-1.02513	0.03458	-1.03716	0.0846397	-1.02731	0.041994
ILMN_1216269	NM_021478.1	Tulp1	Tulp1l	Mus musculus tubby like protein 1 (Tulp1), mRNA.	-1.13763	0.0505338	-1.17938	0.131009	-1.14693	0.13257		-1.10659	0.127335	-1.05114	0.196259	1.00325	0.0988209
ILMN_1216271	AK045964	B230327L12Rik			-1.0856	0.0924798	-1.03765	0.0841141	-1.06137	0.169647		1.03349	0.117974	-1.01182	0.0706072	1.02498	0.0701006
ILMN_1216273	NM_009746.2	Bcl7c	C230096E12Rik	Mus musculus B-cell CLL/lymphoma 7C (Bcl7c), mRNA.	1.13835	0.0980274	-1.00149	0.226137	-1.03383	0.100583		1.13396	0.0660224	1.3496	0.179477	1.18353	0.146908
ILMN_1216275	AK039976	A430038C16Rik			-1.02611	0.125548	1.03494	0.0307723	1.02007	0.143829		1.11236	0.117419	1.10877	0.141459	1.10497	0.0997336
ILMN_1216279	NM_016851.2	Irf6	E230028I05Rik; mirf6; AI876454	Mus musculus interferon regulatory factor 6 (Irf6), mRNA.	1.09199	0.125928	-1.38054	0.115491	-1.50898	0.141421		1.01717	0.182095	-1.59033	0.0535155	-1.55988	0.166096
ILMN_1216280	XM_001471906.1	LOC100044158		PREDICTED: Mus musculus hypothetical protein LOC100044158 (LOC100044158), mRNA.	-1.03128	0.173426	-1.18507	0.088835	-1.12093	0.0319319		-1.19292	0.116936	-1.14046	0.0968346	-1.16912	0.156085
ILMN_1216281	NM_024275.2	Map4k5	KHS; MAPKKKK5; GCKR; 4432415E19Rik	Mus musculus mitogen-activated protein kinase kinase kinase kinase 5 (Map4k5), transcript variant 2, mRNA.	1.08135	0.097332	1.03203	0.0627426	-1.04982	0.123166		1.02559	0.0349923	-1.05314	0.0994034	1.02325	0.139984
ILMN_1216282	NM_015817	Ppap2c			-1.07529	0.118694	-1.00478	0.106663	-1.02821	0.034018		-1.04752	0.0469202	-1.03001	0.141525	-1.04586	0.0147982
ILMN_1216284	NM_033583.2	Pcdhgc5			1.11868	0.124992	1.25915	0.0671908	1.19214	0.106417		1.02233	0.313914	1.19549	0.210941	1.03922	0.342724
ILMN_1216285	NM_013497.3	Creb3	AU044960; Luman; LZIP-2; AW538053; C80076; LZIP-1	Mus musculus cAMP responsive element binding protein 3 (Creb3), mRNA.	1.11631	0.113224	1.14257	0.0327282	1.13041	0.0870112		1.00063	0.116906	1.12515	0.076897	1.07297	0.228173
ILMN_1216287	AK076392	4732489I21Rik			1.23038	0.077549	1.03672	0.14158	1.011	0.134922		1.01195	0.0462981	-1.06338	0.0670549	1.01946	0.0776978
ILMN_1216292	NM_026539.2	Chd1l	Snf2p; 4432404A22Rik	Mus musculus chromodomain helicase DNA binding protein 1-like (Chd1l), mRNA.	-1.08497	0.169385	-1.11061	0.0483797	1.05062	0.0909451		-1.12243	0.047757	1.07932	0.166363	-1.02293	0.0387667
ILMN_1216295	NM_009010.4	Rad23a	mHR23A; 2310040P19Rik; AL024030	Mus musculus RAD23a homolog (S. cerevisiae) (Rad23a), mRNA.	1.072	0.0372736	-1.0782	0.221906	-1.15831	0.0337314		1.05319	0.131159	-1.53363	0.142201	-1.43172	0.241378
ILMN_1216296	AK021343	Csnd			1.04107	0.0799567	-1.05753	0.0269925	-1.10567	0.0621349		-1.16741	0.095418	-1.08123	0.155219	-1.13163	0.0887413
ILMN_1216298	XM_134960.5	Iqch		PREDICTED: Mus musculus IQ motif containing H, transcript variant 1 (Iqch), mRNA.	1.0383	0.152849	1.12469	0.180266	1.04317	0.052873		-1.07424	0.174663	-1.08228	0.171787	-1.08906	0.10736
ILMN_1216300	NM_023135.1	Sult1e1	Ste	Mus musculus sulfotransferase family 1E, member 1 (Sult1e1), mRNA.	1.01946	0.151931	1.56444	1.59999	3.14865	6.20953		1.13197	0.977487	2.90624	1.14113	2.80558	1.47747
ILMN_1216301	NM_011829.2	Impdh1	B930086D20Rik	Mus musculus inosine 5'-phosphate dehydrogenase 1 (Impdh1), mRNA.	1.33485	0.0797782	2.49964	0.512457	2.30304	0.262193		1.32183	0.654522	2.56769	0.20485	1.58755	0.995472
ILMN_1216302	NM_145066.4	Gpr85	2900026B03Rik; DKFZp761L08121	Mus musculus G protein-coupled receptor 85 (Gpr85), mRNA.	-1.09503	0.0561877	-1.20188	0.11462	-1.24423	0.24674		-1.05339	0.142676	-1.13534	0.0934966	1.04031	0.136822
ILMN_1216303	XM_358857.1	LOC385657			-1.06929	0.0687977	-1.07555	0.0935852	1.01103	0.198368		-1.09252	0.0393549	-1.05524	0.0171199	-1.07859	0.0558805
ILMN_1216308	NM_175477.3	Zfp574	A630056B21Rik	Mus musculus zinc finger protein 574 (Zfp574), mRNA.	1.07448	0.0518844	1.03086	0.075265	1.30215	0.192405		1.11223	0.117402	1.11072	0.0865023	1.06177	0.331452
ILMN_1216313	AK031003	Stim1			-1.05487	0.0965091	-1.16438	0.127763	-1.08556	0.13597		-1.00557	0.0909319	-1.09582	0.093155	-1.06517	0.201893
ILMN_1216319	XM_141784.3	LOC245436			-1.07357	0.0921086	-1.06295	0.0698941	-1.03617	0.0893267		1.09057	0.0781284	-1.02272	0.035277	1.0726	0.0335998
ILMN_1216322	NM_008256.3	Hmgcs2	1300002P16; mHS	Mus musculus 3-hydroxy-3-methylglutaryl-Coenzyme A synthase 2 (Hmgcs2), nuclear gene encoding mitochondrial protein, mRNA.	-1.55524	0.0681527	-2.76317	0.100249	-2.74403	0.0551986		-1.11803	0.332752	-3.25825	0.0852197	-2.69078	0.148374
ILMN_1216323	NM_178005	Lrrtm2			-1.0929	0.0862754	-1.07164	0.16007	-1.1313	0.0970775		-1.05515	0.08585	-1.05807	0.0796246	1.07006	0.120609
ILMN_1216326	XM_001476714.1	LOC100046729		PREDICTED: Mus musculus similar to vomeronasal receptor V1RG10 (LOC100046729), mRNA.	1.01604	0.0866139	1.02153	0.0890336	-1.05799	0.0356728		1.04093	0.0577928	-1.05412	0.097831	-1.04176	0.0320369
ILMN_1216330	XM_981898.1	LOC666145		PREDICTED: Mus musculus hypothetical LOC666145 (LOC666145), mRNA.	-1.05506	0.107988	-1.06204	0.212704	1.09356	0.0725202		1.05319	0.0806426	1.08776	0.0692428	1.00824	0.116213
ILMN_1216332	XM_001480841.1	LOC100043518		PREDICTED: Mus musculus hypothetical protein LOC100043518 (LOC100043518), mRNA.	-1.04419	0.14676	-1.01119	0.120367	-1.08023	0.123737		1.05418	0.0179272	-1.031	0.127055	1.06317	0.0323366
ILMN_1216334	NM_177078.3	Adrbk2	AI851927; Adrbk-2; 4833444A01Rik; GRK3; AW551196; Bark-2	Mus musculus adrenergic receptor kinase, beta 2 (Adrbk2), transcript variant 1, mRNA.	-1.05152	0.0348048	1.0795	0.120331	-1.0235	0.0156742		1.0132	0.0700115	-1.04739	0.0584144	1.07732	0.105978
ILMN_1216335	NM_030249.3	Cttnbp2nl	BC003236; AA552995; MGC7720; AU018624; mKIAA1433; AA589392	Mus musculus CTTNBP2 N-terminal like (Cttnbp2nl), mRNA.	1.33171	0.216582	2.13339	0.663539	1.77519	0.322536		1.72534	0.191765	2.8694	0.428206	2.02166	0.101997
ILMN_1216336	XM_974707.2	Sec14l5		PREDICTED: Mus musculus SEC14-like 5 (S. cerevisiae) (Sec14l5), mRNA.	-1.03431	0.111511	1.00375	0.105899	-1.00621	0.0656425		-1.1196	0.105495	-1.12209	0.0762678	-1.05232	0.142582
ILMN_1216337	NM_001029841.3	Sla	Slap; Slap-1	Mus musculus src-like adaptor (Sla), transcript variant 1, mRNA.	1.32521	0.0614937	2.13837	0.412723	2.26636	0.337938		1.27874	0.318136	2.45123	0.392995	1.78444	0.545345
ILMN_1216341	XM_982545.1	Dchs1		PREDICTED: Mus musculus dachsous 1 (Drosophila) (Dchs1), mRNA.	-1.09724	0.0827111	1.19387	0.213042	1.10447	0.0822249		-1.02367	0.175176	1.12784	0.0425877	1.03189	0.177023
ILMN_1216358	NM_011775.6	Zp2	Zp-2	Mus musculus zona pellucida glycoprotein 2 (Zp2), mRNA.	-1.06665	0.0307173	1.01821	0.1423	-1.10789	0.111398		1.06997	0.24304	1.04743	0.103011	1.07654	0.0838293
ILMN_1216368	NM_054052.2	B3gnt5	beta3GnT5	Mus musculus UDP-GlcNAc:betaGal beta-1,3-N-acetylglucosaminyltransferase 5 (B3gnt5), mRNA.	1.10724	0.145223	1.52455	0.0493029	1.22855	0.199626		1.12054	0.266003	1.43177	0.113445	1.08917	0.0177016
ILMN_1216371	XM_359237.1	LOC385639			1.10649	0.0311335	1.00811	0.100126	-1.03434	0.130943		-1.03311	0.113574	1.01919	0.05467	1.00279	0.111833
ILMN_1216374	NM_021715.1	Chst7	GST5; 2600013M07Rik	Mus musculus carbohydrate (N-acetylglucosamino) sulfotransferase 7 (Chst7), mRNA.	-1.20535	0.115644	-1.02398	0.210699	-1.10149	0.370484		1.10899	0.154794	1.46214	0.352857	1.28261	0.0826321
ILMN_1216376	NM_001081124.1	Mtap7d2	5330432J06Rik; C030036K04Rik; RP23-39I7.2; 1600028E09Rik; 2900002G04Rik	Mus musculus MAP7 domain containing 2 (Mtap7d2), mRNA.	1.08098	0.0874293	1.0019	0.0315801	-1.01646	0.159309		1.03619	0.0322741	-1.01115	0.0257758	1.10788	0.120869
ILMN_1216378	NM_013893.1	Reg3d	Ingaprp; MGC130575	Mus musculus regenerating islet-derived 3 delta (Reg3d), mRNA.	1.04304	0.0804526	-1.00502	0.0561424	-1.04992	0.0571677		1.22761	0.111669	-1.03524	0.0588432	-1.04301	0.0270863
ILMN_1216380	NM_008383.2	Cep250	Cep2; Inmp; B230210E21Rik; AW490617	Mus musculus centrosomal protein 250 (Cep250), mRNA. XM_902553 XM_907859 XM_920619 XM_920625 XM_920632	1.02323	0.124803	1.02617	0.129092	1.0189	0.0695223		1.08241	0.101203	-1.02263	0.0710714	1.05242	0.0411504
ILMN_1216381	NM_026756.2	Nfic	NF1-C; AA589446; 1500041O16Rik; 1110019L22Rik; AI746521	Mus musculus nuclear factor I/C (Nfic), transcript variant 2, mRNA.	-1.03083	0.0872605	-1.11686	0.0534074	-1.27214	0.0980903		-1.24161	0.0779636	-1.22946	0.100006	-1.18654	0.165419
ILMN_1216382	NM_007386.2	Aco1	Irp1; Aco-1; Irebp; AI256519	Mus musculus aconitase 1 (Aco1), mRNA.	-1.17148	0.179281	-2.05057	0.0229465	-1.66143	0.132436		-1.45138	0.161799	-2.18277	0.0305523	-2.03671	0.088466
ILMN_1216386	NM_019388.2	Cd86	B7-2; Ly58; TS/A-2; B70; CLS1; B7.2; B7; MB7-2; Ly-58; MB7; Cd28l2	Mus musculus CD86 antigen (Cd86), mRNA.	1.90962	0.781985	1.58779	0.538704	-1.03757	0.511978		2.32556	0.84722	2.27445	0.607454	1.57067	0.382312
ILMN_1216388	NM_025692.2	Uba5	AW240750; 5730525G14Rik	Mus musculus ubiquitin-like modifier activating enzyme 5 (Uba5), mRNA.	1.06232	0.0699094	1.17449	0.132906	-1.12995	0.0734152		-1.12856	0.165764	1.08818	0.0640255	1.10058	0.331208
ILMN_1216390	AK084821	Cdh2			1.0391	0.0286105	-1.04657	0.112367	1.07443	0.108987		1.19009	0.0297563	1.07141	0.00525575	1.03962	0.0366268
ILMN_1216391	XM_917911.2	4930563E22Rik		PREDICTED: Mus musculus RIKEN cDNA 4930563E22 gene, transcript variant 3 (4930563E22Rik), mRNA.	-1.08322	0.0562549	-1.09266	0.0822812	-1.05783	0.0503567		1.05805	0.110899	1.06438	0.0956455	1.0088	0.096732
ILMN_1216393	XM_358946.1	LOC385791			1.00876	0.0828514	1.07897	0.0364037	-1.00251	0.111284		1.03077	0.0956748	-1.01919	0.131911	1.04271	0.0496037
ILMN_1216394	NM_011052.1	Pdcd6ip	AI480591; Eig2; Alix; mKIAA1375; C76364; AIP1; AW544830	Mus musculus programmed cell death 6 interacting protein (Pdcd6ip), mRNA.	1.10383	0.108221	1.2985	0.11416	1.20199	0.173999		1.00208	0.198422	1.10454	0.131931	1.14943	0.154494
ILMN_1216395	XM_001475729.1	LOC100040766		PREDICTED: Mus musculus similar to hCG2012694 (LOC100040766), mRNA.	-1.03192	0.0534425	-1.18291	0.114346	-1.19194	0.0295922		-1.18934	0.0810038	-1.33145	0.0542557	-1.20079	0.0913764
ILMN_1216399	NM_001031811.1	Kcnh8	ELK1; Kv12.1; C130090D05Rik; ELK; ELK3	Mus musculus potassium voltage-gated channel, subfamily H (eag-related), member 8 (Kcnh8), mRNA.	-1.05719	0.0172481	-1.09234	0.0560271	-1.07882	0.159066		1.17786	0.210465	-1.02704	0.099089	1.03601	0.0427498
ILMN_1216400	XM_977944.2	1700008P02Rik		PREDICTED: Mus musculus RIKEN cDNA 1700008P02 gene (1700008P02Rik), mRNA.	1.01675	0.0861564	-1.06112	0.058891	-1.03484	0.0583782		1.00293	0.06929	-1.11989	0.0821219	-1.13554	0.122432
ILMN_1216403	AK053088	D930048H02Rik			1.01314	0.0303312	-1.12352	0.116507	-1.17689	0.00555314		1.04385	0.0756281	-1.07602	0.0633765	-1.10297	0.0582246
ILMN_1216404	NM_172426.1	Slc24a2			-1.04289	0.094123	-1.17834	0.0516552	-1.11182	0.121304		1.01987	0.0900452	-1.0223	0.134338	-1.10552	0.124887
ILMN_1216405	NM_144873.2	Uhrf2	AI426270; Nirf; AW214556; 2310065A22Rik; D130071B19Rik	Mus musculus ubiquitin-like, containing PHD and RING finger domains 2 (Uhrf2), mRNA.	-1.08494	0.102173	-1.14512	0.0111515	-1.29562	0.196446		-1.03168	0.111434	-1.11413	0.0687881	-1.21862	0.257689
ILMN_1216406	AK037105	9930115F03Rik			-1.14708	0.0749664	-1.23204	0.0898207	-1.20236	0.0832199		1.03582	0.023386	-1.06998	0.062926	-1.01185	0.112948
ILMN_1216407	NM_183287.2	2610318N02Rik	AL033325	Mus musculus RIKEN cDNA 2610318N02 gene (2610318N02Rik), mRNA.	1.13299	0.0554444	-1.04746	0.192895	1.05442	0.125806		1.04755	0.0333446	1.07825	0.0393108	-1.00857	0.0501432
ILMN_1216409	NM_001081005.1	1500012F01Rik		Mus musculus RIKEN cDNA 1500012F01 gene (1500012F01Rik), mRNA.	1.10109	0.159288	1.21799	0.827725	1.35746	0.322263		-1.00587	0.302582	1.83866	0.0452439	1.61842	0.170882
ILMN_1216411	XM_145602.3	LOC233227			-1.12426	0.0774318	-1.25036	0.117441	-1.04893	0.174215		-1.12239	0.04207	-1.08308	0.072608	-1.12436	0.0828389
ILMN_1216412	NM_010247.2	Xrcc6	70kDa; Ku70; G22p1	Mus musculus X-ray repair complementing defective repair in Chinese hamster cells 6 (Xrcc6), mRNA.	-1.12718	0.243383	-1.16728	0.145557	-1.23946	0.209052		-1.08821	0.180232	-1.27325	0.0945813	-1.51814	0.0604406
ILMN_1216416	NM_028774.2	Rnf6	AA537053; 5730419H05Rik; 1200013I08Rik	Mus musculus ring finger protein (C3H2C3 type) 6 (Rnf6), mRNA.	-1.01568	0.0796876	-1.31746	0.108487	-1.76045	0.116058		1.05686	0.205439	-1.03667	0.159206	-1.17946	0.267796
ILMN_1216422	NM_028780.3	Tm9sf1	AI893436; MP70; 1200014D02Rik	Mus musculus transmembrane 9 superfamily member 1 (Tm9sf1), mRNA.	-1.03289	0.0351702	-1.0428	0.0333009	-1.11769	0.104245		-1.02213	0.0275779	-1.10651	0.103487	-1.02969	0.0737681
ILMN_1216425	NM_026685.1	Tmem174	AA986094; 0610009B10Rik	Mus musculus transmembrane protein 174 (Tmem174), mRNA.	-1.07957	0.138551	-1.05031	0.0933609	-1.07128	0.139993		1.02165	0.0688177	-1.07609	0.0374249	-1.12909	0.170901
ILMN_1216426	NM_177730.3	Impad1	AA408880; 1110001C20Rik; AL022796; AI451589; B230207P20	Mus musculus inositol monophosphatase domain containing 1 (Impad1), mRNA.	-1.06866	0.119161	-1.04182	0.0578975	-1.3828	0.172626		1.00164	0.0776278	-1.02885	0.0665979	1.0349	0.301757
ILMN_1216433	XR_031715.1	LOC100045460		PREDICTED: Mus musculus similar to Ssxb3 protein (LOC100045460), misc RNA.	-1.06885	0.0418971	1.02668	0.142231	-1.02884	0.170375		-1.16836	0.0845542	-1.13145	0.084575	-1.27194	0.0811116
ILMN_1216435	XM_359086.1	LOC386135			-1.07124	0.0433292	-1.15592	0.0889459	-1.04427	0.0906823		1.05376	0.138621	1.00526	0.112487	-1.10328	0.0429181
ILMN_1216436	NM_030728.3	9930013L23Rik	12H19.01.T7; 6330404C01Rik; AY007814	Mus musculus RIKEN cDNA 9930013L23 gene (9930013L23Rik), mRNA.	1.01983	0.128559	-1.09648	0.0693276	-1.07035	0.0466566		-1.16182	0.102078	-1.20743	0.17091	-1.13645	0.0667131
ILMN_1216437	NM_001003930	Rtn3			-1.03227	0.143644	1.07316	0.0443241	1.14262	0.183004		-1.05657	0.218872	1.01396	0.22563	-1.10862	0.132762
ILMN_1216439	XM_979472.1	1700084E18Rik		PREDICTED: Mus musculus RIKEN cDNA 1700084E18 gene (1700084E18Rik), mRNA.	-1.25058	0.0154808	-1.1168	0.0144319	-1.17794	0.103846		-1.03527	0.148303	-1.08056	0.0600416	1.04787	0.122163
ILMN_1216440	NM_015828	Gne			-1.00412	0.0647814	-1.13133	0.0708415	1.32207	0.228442		1.10208	0.173276	-1.0117	0.217846	1.10574	0.246576
ILMN_1216442	NM_009123	Nkx1-2			1.01251	0.127109	-1.05865	0.0192391	-1.05419	0.0978851		-1.00862	0.152698	-1.12337	0.126505	-1.04039	0.151154
ILMN_1216443	XM_357219.1	LOC383741			-1.0753	0.0777682	-1.0808	0.102453	-1.08625	0.133561		1.13089	0.134602	1.08243	0.176992	1.00007	0.0231361
ILMN_1216444	XM_357901.1	LOC384860			-1.0754	0.103727	-1.16931	0.104757	-1.01823	0.142941		-1.00973	0.126632	-1.14793	0.0355965	-1.14987	0.00042469
ILMN_1216446	NM_023219.2	Slc5a4b	SGLT3-b; SAAT1; 2010104G07Rik; pSGLT2	Mus musculus solute carrier family 5 (neutral amino acid transporters, system A), member 4b (Slc5a4b), mRNA.	-1.05799	0.0354844	1.04158	0.0593721	1.02509	0.0919252		1.18481	0.106432	1.01875	0.0717206	1.07696	0.112195
ILMN_1216451	AK007015	1700086E08Rik			1.04288	0.0575581	-1.00074	0.12006	1.03019	0.132845		1.09656	0.119067	1.0023	0.119279	1.12917	0.0191417
ILMN_1216452	NM_008220.3	Hbb-b1	AA409645	Mus musculus hemoglobin, beta adult major chain (Hbb-b1), mRNA.	1.37258	0.944413	3.4503	1.18654	4.28672	1.76136		-1.63468	3.27229	1.25048	2.91997	-1.14467	2.20873
ILMN_1216456	NM_198664.1	A630005A06Rik			1.01697	0.0913466	-1.23926	0.022528	-1.12851	0.0692694		-1.1717	0.0301002	-1.12224	0.113025	-1.08762	0.0241766
ILMN_1216460	NM_007949.4	Ercc2	AW240756; Ercc-2; AU020867; XPD; AA407812	Mus musculus excision repair cross-complementing rodent repair deficiency, complementation group 2 (Ercc2), mRNA.	-1.00715	0.0551639	-1.23088	0.0425397	1.01982	0.208917		-1.19197	0.0398573	-1.05386	0.10621	-1.2175	0.0371015
ILMN_1216463	XM_001475178.1	1010001N08Rik		PREDICTED: Mus musculus RIKEN cDNA 1010001N08 gene (1010001N08Rik), mRNA.	1.12739	0.0800161	-1.40975	0.0868324	-1.32892	0.0056321		-1.18645	0.126473	-1.32418	0.0720908	-1.49366	0.0657778
ILMN_1216465	XM_287394.1	LOC329967			1.01891	0.0676485	-1.11004	0.0757152	1.04328	0.136485		-1.03047	0.0579467	-1.08624	0.100672	-1.11966	0.150879
ILMN_1216469	NM_010597.3	Kcnab1	Kvbeta1.1; Akr8a8; mKv(beta)1	Mus musculus potassium voltage-gated channel, shaker-related subfamily, beta member 1 (Kcnab1), mRNA.	1.09487	0.0317579	1.02058	0.209679	1.0888	0.136287		1.00515	0.0379635	-1.04308	0.12362	-1.09433	0.0961407
ILMN_1216473	NM_029582.2	Txndc11	2810408E11Rik; Txdc11; EFP1; AI427833	Mus musculus thioredoxin domain containing 11 (Txndc11), transcript variant 1, mRNA.	1.10949	0.117523	1.25383	0.155528	1.13374	0.0329514		1.03799	0.0331976	1.23011	0.129377	1.31117	0.12231
ILMN_1216474	AK048654	C130094K23Rik			-1.10217	0.0264578	-1.0273	0.0589883	1.00332	0.160362		-1.05375	0.0781019	-1.04179	0.0571751	-1.07066	0.0496742
ILMN_1216475	NM_013555.2	Hoxd9	Hox-5.2; Hox-4.4	Mus musculus homeo box D9 (Hoxd9), mRNA.	1.01483	0.06424	-1.05127	0.0929403	-1.09015	0.0436147		-1.04347	0.0981384	-1.05407	0.127732	-1.07253	0.0433448
ILMN_1216476	AK039924	A430031C20Rik			1.01895	0.194447	1.02076	0.164681	1.07857	0.10891		1.08906	0.0740321	-1.06124	0.035794	-1.0039	0.0705049
ILMN_1216484	AK083778	Pex3			-1.08085	0.142324	-1.18243	0.0954376	-1.13525	0.165457		-1.02632	0.0988993	1.00577	0.113069	-1.05986	0.076763
ILMN_1216485	AK044751	A930039H18Rik			-1.00735	0.0431823	1.02675	0.0677479	1.06477	0.127178		1.05672	0.110183	1.0655	0.090095	1.02795	0.215913
ILMN_1216487	XM_988979.1	Trrap		PREDICTED: Mus musculus transformation/transcription domain-associated protein, transcript variant 1 (Trrap), mRNA.	1.13022	0.220842	1.22809	0.21127	1.40676	0.180776		-1.01557	0.0675497	1.03354	0.191584	1.08499	0.378879
ILMN_1216488	AK034668	9430022L01Rik			-1.11152	0.0728123	-1.08271	0.0873125	-1.08598	0.159245		-1.00901	0.0655016	-1.02892	0.119287	1.00552	0.135309
ILMN_1216490	NM_010375.2	Gzmg	Ctla-7; MGC117682; Ctla7	Mus musculus granzyme G (Gzmg), mRNA.	1.03797	0.162472	-1.01795	0.128387	-1.09893	0.177978		1.09997	0.0989817	1.00849	0.0734042	1.1206	0.0728863
ILMN_1216491	NM_177887	BC022651			-1.0071	0.192608	-1.0204	0.139886	-1.06275	0.0929961		-1.02709	0.0825315	1.05128	0.129535	-1.03489	0.0535532
ILMN_1216493	NM_019879.2	Suclg1	Sucla1; 1500000I01Rik	Mus musculus succinate-CoA ligase, GDP-forming, alpha subunit (Suclg1), mRNA.	-1.2753	0.137339	-2.05671	0.100768	-1.72031	0.143604		-1.05171	0.438099	-2.00043	0.124193	-2.14981	0.0544331
ILMN_1216494	XM_973282.1	EG640554		PREDICTED: Mus musculus predicted gene, EG640554 (EG640554), mRNA.	1.00903	0.155461	-1.01313	0.083871	-1.07222	0.127439		1.06423	0.140664	1.06269	0.16117	1.02938	0.11317
ILMN_1216500	XM_355305.1	LOC381341			-1.11715	0.0710515	-1.1298	0.086899	-1.1065	0.0237693		-1.04039	0.104133	-1.08003	0.0847212	-1.11508	0.0781576
ILMN_1216504	NM_026305.1	Tceb2	0610040H15Rik	Mus musculus transcription elongation factor B (SIII), polypeptide 2 (Tceb2), mRNA.	-1.00261	0.122409	1.05345	0.0353448	1.12262	0.131976		1.03587	0.0688711	1.1514	0.0553632	1.15849	0.117742
ILMN_1216505	XM_906811.3	4930562C15Rik		PREDICTED: Mus musculus RIKEN cDNA 4930562C15 gene (4930562C15Rik), mRNA.	1.06091	0.0891107	1.00651	0.0458005	-1.05681	0.0610883		-1.03057	0.110917	-1.09905	0.0691218	-1.06329	0.137719
ILMN_1216509	NM_001033875.2	Ctrc	MGC107504; 1810044E12Rik	Mus musculus chymotrypsin C (caldecrin) (Ctrc), mRNA.	-1.00365	0.17206	-1.0553	0.0616918	-1.08651	0.229101		2.35398	0.214346	-1.01457	0.0437095	1.00564	0.0494279
ILMN_1216515	NM_145990.3	Cdk5rap2	MGC38528; 2900018K03Rik; mKIAA1633	Mus musculus CDK5 regulatory subunit associated protein 2 (Cdk5rap2), mRNA.	1.02185	0.0113168	1.02833	0.175875	-1.0158	0.0782313		1.04968	0.119851	1.01929	0.112611	-1.04608	0.0868289
ILMN_1216516		9626978_151			1.12641	0.115567	1.07167	0.0569436	-1.04379	0.0805627		-1.11658	0.12548	-1.07071	0.113565	-1.16575	0.0910222
ILMN_1216519	XM_194023.1	Myo3b			-1.10173	0.0303109	-1.09354	0.0449493	-1.11726	0.084003		-1.0596	0.0337818	-1.12819	0.126711	1.07051	0.0577095
ILMN_1216521	NM_029419.1	Apol7a	9130022K13Rik	Mus musculus apolipoprotein L 7a (Apol7a), mRNA.	-1.05631	0.328542	-2.35246	0.114244	-4.47264	0.125388		-1.07238	0.376184	-2.5236	0.132001	-2.48944	0.059071
ILMN_1216522	NM_198429.1	Nfatc1	NFATc; NFAT2; 2210017P03Rik; AV076380; AI449492; Nfatcb; NF-ATc	Mus musculus nuclear factor of activated T-cells, cytoplasmic, calcineurin-dependent 1 (Nfatc1), transcript variant 2, mRNA.	1.33312	0.234691	1.58997	0.143094	1.86059	0.183797		1.24551	0.222929	1.43782	0.112382	1.28702	0.787272
ILMN_1216526	NM_001014976.1	Espl1	AL024103; ESP1; PRCE; AU045071; SSE	Mus musculus extra spindle poles-like 1 (S. cerevisiae) (Espl1), mRNA.	-1.08918	0.0602422	-1.08344	0.0639857	-1.07459	0.138752		-1.00433	0.0197763	-1.08088	0.0351331	1.07003	0.145181
ILMN_1216529	XM_913264.3	EG233445		PREDICTED: Mus musculus predicted gene, EG233445 (EG233445), mRNA.	-1.23993	0.16854	-1.0961	0.0244137	-1.18422	0.0417716		1.01075	0.144603	1.00945	0.152236	-1.13734	0.072621
ILMN_1216534	NM_178780.3	Ric3	E130307J04Rik	Mus musculus resistance to inhibitors of cholinesterase 3 homolog (C. elegans) (Ric3), transcript variant 2, mRNA.	-1.06557	0.0801388	1.07002	0.127743	-1.15909	0.212239		1.03907	0.164981	1.02799	0.0894059	1.14904	0.208618
ILMN_1216536	XM_356533.1	LOC382493			-1.07683	0.0616419	-1.04598	0.107132	-1.1707	0.0603675		-1.01815	0.0465301	-1.24741	0.117093	-1.18734	0.0672945
ILMN_1216537	XM_149025.3	LOC227265			1.0247	0.116934	-1.11829	0.246066	1.16722	0.298509		-1.24041	0.121109	-1.59861	0.139854	-1.12301	0.167546
ILMN_1216538	NM_021328.3	Bin3	1700015F07Rik	Mus musculus bridging integrator 3 (Bin3), mRNA.	1.07086	0.0731941	1.13168	0.149083	1.48875	0.167624		-1.0454	0.104151	1.03204	0.080341	1.03267	0.487722
ILMN_1216539	NM_023455.2	Cml4	0610037O16Rik	Mus musculus camello-like 4 (Cml4), mRNA.	-1.21238	0.0528593	2.29191	0.328707	1.77073	0.462424		-1.00421	1.24616	2.6831	0.314117	2.81413	0.557991
ILMN_1216541	NM_001081294.1	Prr19		Mus musculus proline rich 19 (Prr19), mRNA.	1.02712	0.103286	-1.01418	0.0427226	-1.03181	0.132424		1.0198	0.0686705	1.08993	0.113798	1.06427	0.123748
ILMN_1216546	NM_027121.2	Vkorc1l1			-1.10619	0.075098	-1.11948	0.0470725	-1.14719	0.0917274		-1.10824	0.0710243	-1.32689	0.129163	-1.18941	0.0644607
ILMN_1216547	NM_001081236.1	2410131K14Rik	MGC129458; MGC129459	Mus musculus RIKEN cDNA 2410131K14 gene (2410131K14Rik), mRNA.	-1.20442	0.130055	-1.32479	0.0406501	-1.1342	0.0219467		1.01766	0.237126	-1.16644	0.151179	-1.05724	0.138706
ILMN_1216550	NM_182807.2	AI851790	FAM19A2 TAFA-2; TAFA2; Tafa-2; 6330575M02	Mus musculus expressed sequence AI851790 (AI851790), mRNA.	1.03833	0.069522	-1.09644	0.0410443	-1.19345	0.0738534		-1.04043	0.0292312	-1.02464	0.109874	-1.04171	0.100031
ILMN_1216551	AK050055	C730009A15Rik			1.0565	0.0720398	-1.04408	0.138574	-1.19765	0.0823917		-1.03505	0.0423927	-1.13611	0.0212926	1.03505	0.154586
ILMN_1216552	NM_175484.3	Coro2b	E130012P22Rik; CLIPINC	Mus musculus coronin, actin binding protein, 2B (Coro2b), mRNA.	-1.00178	0.148398	-1.01816	0.127729	-1.06906	0.0193469		-1.15683	0.116501	-1.05136	0.120255	-1.07753	0.0536013
ILMN_1216553	AK085443	Rgs9			-1.1142	0.0315415	-1.17204	0.0910076	-1.1596	0.18557		1.05108	0.18569	-1.01003	0.163049	1.15995	0.22386
ILMN_1216554	XM_285905.2	LOC330240			1.06656	0.176112	1.02864	0.0533258	-1.05634	0.0816007		1.01591	0.0413319	-1.02127	0.075434	1.0127	0.0337705
ILMN_1216559	NM_025975.5	Dynlt3	Tcte1l; AU042796; 2310075M16Rik	Mus musculus dynein light chain Tctex-type 3 (Dynlt3), mRNA.	-1.12717	0.252597	-1.41285	0.24842	-1.74551	0.230522		1.06334	0.2068	-1.00313	0.146703	1.0338	0.470359
ILMN_1216560	NM_027758.3	Tbc1d9	AI847101; AW490653; 4933431N12Rik; C76116	Mus musculus TBC1 domain family, member 9 (Tbc1d9), mRNA.	1.0224	0.101329	1.00923	0.130435	-1.05792	0.150473		1.01561	0.052036	-1.07244	0.0557618	-1.02963	0.138636
ILMN_1216561	AK042722	Camk2d			-1.01537	0.0808762	1.04551	0.233109	1.02984	0.138284		1.04085	0.0668854	1.09559	0.0995652	1.2048	0.17372
ILMN_1216566	NM_001024698.2	Cpa2	MGC107514	Mus musculus carboxypeptidase A2, pancreatic (Cpa2), mRNA.	-1.10156	0.121405	-1.04043	0.0408318	-1.20252	0.295488		2.47902	0.0412091	-1.05533	0.0525413	1.15948	0.130873
ILMN_1216568	XM_980894.1	4833446K15Rik		PREDICTED: Mus musculus RIKEN cDNA 4833446K15 gene, transcript variant 1 (4833446K15Rik), mRNA.	-1.22005	0.237963	-1.0305	0.134952	1.00704	0.30661		1.05062	0.145688	1.09749	0.179289	1.15902	0.373965
ILMN_1216569	AK018689	9130423G08Rik			-1.00233	0.0561475	-1.04561	0.223591	1.01268	0.0560015		-1.07195	0.0639291	-1.17675	0.0188601	-1.09263	0.126621
ILMN_1216575	XM_283758.1	LOC329506			-1.02619	0.100609	-1.02483	0.0287883	-1.01047	0.129086		1.02025	0.0736206	-1.03889	0.0654389	1.04061	0.0756456
ILMN_1216577	XM_357047.1	LOC383428			1.02622	0.111235	-1.02279	0.0451272	-1.00192	0.0826389		1.03517	0.0103962	-1.1382	0.0959079	-1.03325	0.0604545
ILMN_1216582	AK086178	D930010K02Rik			1.08453	0.119292	1.06107	0.0750318	1.15422	0.0740179		1.05666	0.0405381	-1.0169	0.0544259	-1.0045	0.0441977
ILMN_1216584	AK083075	C530044G15Rik			1.08567	0.354994	-1.14097	0.155911	1.03363	0.237956		-1.18571	0.0747915	-1.4244	0.0706839	-1.35176	0.242684
ILMN_1216586	AK033272	8030481M12Rik			1.082	0.0534674	1.05115	0.102587	-1.06073	0.260141		1.05469	0.110525	-1.06733	0.182604	-1.02526	0.0758788
ILMN_1216587		4732460I02Rik			1.06813	0.156723	1.03672	0.201356	-1.02529	0.105677		-1.04185	0.017467	-1.1747	0.0572466	-1.17592	0.0833357
ILMN_1216590	NM_184053.2	Calu	9530075H20Rik	Mus musculus calumenin (Calu), transcript variant 2, mRNA.	1.02027	0.347492	1.02831	0.264538	1.09003	0.386539		1.12184	0.122926	1.22967	0.236958	1.07645	0.456813
ILMN_1216591	NM_177940.1	Ece2	6330509A19Rik; 1810009K13Rik; MGC144386; MGC144385; 9630025D12Rik; BB127715	Mus musculus endothelin converting enzyme 2 (Ece2), transcript variant 2, mRNA.	-1.07463	0.0707672	-1.07566	0.102659	1.03383	0.0821975		1.0022	0.0660232	-1.13075	0.0576164	-1.01633	0.131333
ILMN_1216592	AK035061	M6a-pending			1.01966	0.04612	-1.00209	0.0606357	-1.10813	0.158175		1.08119	0.0930983	-1.05661	0.0929315	-1.06799	0.0946006
ILMN_1216594	AK076147	3010015F07Rik			-1.11116	0.0674701	1.01642	0.126287	-1.10249	0.14651		1.09388	0.0802609	1.00909	0.0797095	1.07211	0.127192
ILMN_1216597	NM_146118.2	Slc25a25	MGC36388; MCSC; 1110030N17Rik; mKIAA1896	Mus musculus solute carrier family 25 (mitochondrial carrier, phosphate carrier), member 25 (Slc25a25), nuclear gene encoding mitochondrial protein, mRNA.	1.45586	0.760762	1.38981	0.361148	1.1203	0.554833		-1.34071	0.462557	-1.58236	0.60523	-1.00224	1.21267
ILMN_1216599	AK053591	E130112L06Rik			1.08584	0.0566747	-1.04386	0.143132	-1.03285	0.0543395		-1.05721	0.0593201	-1.00453	0.198186	-1.12607	0.0905126
ILMN_1216600	XM_001474892.1	Shb		PREDICTED: Mus musculus src homology 2 domain-containing transforming protein B (Shb), mRNA.	-1.06088	0.191919	-1.1823	0.152994	-1.08331	0.314807		-1.11735	0.29274	-1.11898	0.165582	1.19986	0.26825
ILMN_1216601	NM_027728.2	4933434I06Rik	AU016229; MGC117794	Mus musculus RIKEN cDNA 4933434I06 gene (4933434I06Rik), mRNA.	-1.00027	0.117238	1.12283	0.080018	1.00901	0.164405		1.05512	0.0772509	1.11024	0.195062	1.13331	0.0691172
ILMN_1216602	BC059087.1	scl000959.1_2			-3.238	0.0307749	-3.07319	0.318555	-3.76836	0.391222		2.27362	0.324327	-1.08319	0.355154	-1.09373	0.380362
ILMN_1216606	NM_172522	2410080H04Rik			-1.06945	0.107367	-1.08873	0.0306702	-1.08941	0.0892011		-1.04387	0.059044	-1.10072	0.0232438	-1.02151	0.0701703
ILMN_1216607	NM_008312.3	Htr2c	Htr1c; 5-HT2cR; 5HT1c; SR1	Mus musculus 5-hydroxytryptamine (serotonin) receptor 2C (Htr2c), mRNA.	-1.13832	0.0734959	-1.2134	0.0224882	-1.20882	0.186525		1.00955	0.141569	-1.04439	0.156505	-1.05943	0.0922337
ILMN_1216609	AK037846	A130054J05Rik			-1.00784	0.146135	1.03257	0.101364	1.04636	0.178015		-1.04189	0.0181997	-1.00332	0.0647173	1.03207	0.0742894
ILMN_1216614	NM_001024508.2	Brd9	AL022779	Mus musculus bromodomain containing 9 (Brd9), mRNA.	1.13345	0.177882	1.35257	0.112642	1.27746	0.0529456		1.08013	0.255931	1.36984	0.060224	1.13901	0.147661
ILMN_1216616	NM_030180.2	Usp54	AI115571; 4930429G18Rik; C030002J06Rik	Mus musculus ubiquitin specific peptidase 54 (Usp54), mRNA.	-1.0779	0.0963002	-1.01032	0.0887774	-1.08414	0.0853606		-1.03097	0.103682	-1.18395	0.083875	-1.02701	0.0618614
ILMN_1216617		C430014K11Rik			1.04223	0.0974487	1.23211	0.0448607	1.2631	0.107598		-1.09443	0.324996	1.03677	0.280389	1.15077	0.312039
ILMN_1216618	XM_357367.1	LOC384000			1.11028	0.128867	-1.04477	0.0456623	-1.08705	0.114794		1.01581	0.0556626	-1.12882	0.0714176	1.0218	0.0341787
ILMN_1216620	XM_356783.1	LOC382980			-1.06889	0.099107	-1.15265	0.120537	-1.07125	0.0485883		1.01358	0.134531	-1.08953	0.0752203	-1.05399	0.0303776
ILMN_1216623	XR_033486.1	LOC100047369		PREDICTED: Mus musculus similar to 0610007P22Rik protein (LOC100047369), misc RNA.	-1.05853	0.11741	-1.19595	0.0352762	-1.17247	0.0369969		-1.25508	0.0749825	-1.23316	0.0971773	-1.14944	0.101181
ILMN_1216624	NM_001033271.3	Tmem55b	BC039161; MGC118137	Mus musculus transmembrane protein 55b (Tmem55b), mRNA. XM_919952 XM_919965	1.21607	0.23444	-1.02671	0.0800666	-1.0429	0.134553		1.08402	0.108337	1.10609	0.127968	-1.09337	0.1229
ILMN_1216625	NM_010319.2	Gng7			-1.00666	0.138237	1.01439	0.121487	-1.015	0.0235538		-1.0307	0.100062	-1.13136	0.0739407	-1.05456	0.0720729
ILMN_1216631	NM_153151.1	Acat3			-1.10758	0.229791	-1.82224	0.130582	-1.6909	0.150407		-1.06308	0.397346	-1.77952	0.152882	-1.93964	0.0129924
ILMN_1216632	NM_133926.2	Camk1	AI505105; D6Ertd263e; CaMKIalpha	Mus musculus calcium/calmodulin-dependent protein kinase I (Camk1), mRNA.	-1.0714	0.177635	1.19519	0.243083	1.51769	0.172987		-1.11446	0.185461	1.44865	0.187958	1.1331	0.752542
ILMN_1216633	NM_033573.1	Prcc		Mus musculus papillary renal cell carcinoma (translocation-associated) (Prcc), mRNA.	1.05851	0.120074	1.00208	0.0680691	1.04468	0.0545095		1.05285	0.160752	1.08085	0.0895678	-1.02859	0.172326
ILMN_1216636	AK037202	A030009J19Rik			-1.09318	0.0715799	-1.20082	0.0281551	-1.15129	0.0227122		-1.04807	0.0749191	-1.13951	0.0450576	-1.07189	0.0283278
ILMN_1216639	NM_008778.2	Pak3	mPAK-3; PAK-3; Stk4; Pak65beta; Pak65alpha	Mus musculus p21 (CDKN1A)-activated kinase 3 (Pak3), mRNA.	1.03047	0.152773	-1.05479	0.0780615	-1.08013	0.148136		1.08695	0.133204	-1.03064	0.0808342	-1.01461	0.128835
ILMN_1216649	NM_177639.5	Dlgap1	Gkap; D17Bwg0511e; KIAA4162; BB075781; AI848168; GKPA/SAPAP; Sapap1; mKIAA4162; 9630002F18; AI845682; 4933422O14Rik	Mus musculus discs, large (Drosophila) homolog-associated protein 1 (Dlgap1), mRNA.	-1.09631	0.042766	-1.04507	0.121836	1.07122	0.0650372		1.00005	0.0954133	-1.16304	0.0539712	-1.04881	0.0886117
ILMN_1216653	XM_358134.1	LOC385235			1.07606	0.115668	1.11296	0.102162	-1.01554	0.0337111		1.05441	0.107125	-1.13527	0.198729	-1.04748	0.0809416
ILMN_1216656	AK083240	C630030K01Rik			1.0179	0.164989	-1.07698	0.116608	-1.02845	0.1738		-1.03325	0.023588	-1.00005	0.0229902	-1.07911	0.0895645
ILMN_1216660	NM_172682.2	9930021J17Rik		Mus musculus RIKEN cDNA 9930021J17 gene (9930021J17Rik), mRNA.	-1.03185	0.054732	1.05295	0.0816333	1.06563	0.0713767		-1.01564	0.13432	-1.06772	0.180125	-1.06932	0.12706
ILMN_1216661	NM_146007.1	Col6a2	Col6a-2; MGC36205	Mus musculus procollagen, type VI, alpha 2 (Col6a2), mRNA.	1.32793	0.165884	8.90753	4.39575	15.3842	1.59747		1.09247	8.01015	15.1687	4.16853	10.2086	13.4636
ILMN_1216662	NM_008449.2	Kif5c	NKHC; NKHC-2; NKHC2; mKIAA0531; KINN	Mus musculus kinesin family member 5C (Kif5c), mRNA.	1.15034	0.0678372	1.15771	0.052094	1.06042	0.108471		1.03742	0.124283	1.1189	0.134594	1.11636	0.0389977
ILMN_1216663	NM_029836.1	DXBwg1396e			-1.07305	0.0609826	1.17001	0.194362	1.08788	0.125514		1.11052	0.0905041	1.1846	0.110633	1.26638	0.108352
ILMN_1216667	NM_008169.1	Grin1	NMDAR1; GluRdelta1; Nmdar; NR1	Mus musculus glutamate receptor, ionotropic, NMDA1 (zeta 1) (Grin1), mRNA.	1.0902	0.0902903	-1.00834	0.108067	1.0055	0.078839		-1.05454	0.0820675	-1.21174	0.100701	-1.0952	0.155472
ILMN_1216669	NM_030075.1	Klhdc8b	4931406O17Rik	Mus musculus kelch domain containing 8B (Klhdc8b), mRNA.	-1.04804	0.145484	-1.03832	0.0354432	1.11434	0.0385076		1.02741	0.0151134	1.11941	0.154897	1.17686	0.086061
ILMN_1216670	AK050521	C820007E08Rik			1.05997	0.174908	-1.3899	0.00697361	-1.25295	0.0526176		-1.20515	0.0871273	-1.37512	0.10057	-1.3634	0.0639564
ILMN_1216671	NM_001033978.2	H2-Eb2	Iebeta2; A130038H09Rik; H-2Eb2; Ia-5; Ia5	Mus musculus histocompatibility 2, class II antigen E beta2 (H2-Eb2), mRNA.	1.13412	0.100942	1.12961	0.0979755	1.12269	0.108838		1.03979	0.0766117	1.12067	0.184089	-1.01748	0.370234
ILMN_1216674	XM_125096.3	LOC234882			-1.14482	0.0814909	-1.37344	0.0822256	-1.59612	0.1359		-1.08365	0.159943	-1.24711	0.0688608	-1.18214	0.208819
ILMN_1216675		2900072M03Rik			1.06359	0.0596437	1.22945	0.151025	1.25692	0.222256		1.08829	0.148099	-1.08176	0.225692	-1.0109	0.210525
ILMN_1216676	XM_140499.7	Kcng2		PREDICTED: Mus musculus potassium voltage-gated channel, subfamily G, member 2 (Kcng2), mRNA.	-1.10793	0.12161	-1.19838	0.0448256	-1.05828	0.123853		-1.02727	0.106892	-1.11283	0.0847657	-1.12924	0.0627521
ILMN_1216677	AK039177	A230104N20Rik			1.11413	0.121024	1.04715	0.0678743	1.17164	0.173665		-1.17308	0.14914	-1.11181	0.0922664	-1.11159	0.14696
ILMN_1216681	XR_033448.1	LOC667776		PREDICTED: Mus musculus similar to Non-POU-domain-containing, octamer binding protein (LOC667776), misc RNA.	-1.04801	0.263785	1.00539	0.277674	-1.17286	0.227465		-1.35915	0.415087	-1.02147	0.326345	-1.23687	0.0991804
ILMN_1216682	AK042935	A730041H09Rik			-1.02884	0.0484447	-1.0269	0.136193	1.03238	0.148628		-1.17604	0.0546269	-1.30553	0.0986507	-1.21471	0.131846
ILMN_1216683	XM_146232.2	LOC244282			-1.08518	0.0490115	-1.2415	0.0719669	-1.14583	0.140819		-1.01805	0.0837444	-1.10167	0.110575	1.00928	0.0684695
ILMN_1216684	AK031346	6030410I10Rik			-1.05381	0.0353514	1.09687	0.0956982	1.16854	0.121457		1.08347	0.107538	1.02884	0.0794663	1.07139	0.11075
ILMN_1216685	XM_137047.2	LOC237343			1.00378	0.160622	1.00359	0.159942	1.0105	0.130098		-1.08713	0.124617	-1.14231	0.0563274	-1.17771	0.127759
ILMN_1216687	AK036483	9830116C06Rik			-1.13566	0.103002	-1.22907	0.058462	-1.29083	0.059706		-1.04348	0.0664722	-1.17339	0.0220523	-1.15639	0.0724571
ILMN_1216688	NM_010390.2	H2-Q1	Qed-1; H-2Q1; Qa1; Q1k; Q1d; MGC91064; Qa-1; Q1b	Mus musculus histocompatibility 2, Q region locus 1 (H2-Q1), mRNA.	1.00201	0.189832	1.00345	0.0746339	-1.02684	0.239525		-1.14443	0.0925235	-1.17253	0.161828	-1.24421	0.0268032
ILMN_1216689	NM_009691.2	Aplp2	AI790698	Mus musculus amyloid beta (A4) precursor-like protein 2 (Aplp2), transcript variant 3, mRNA.	1.0029	0.104121	-1.01471	0.116252	-1.0629	0.108593		-1.0173	0.0223424	-1.08415	0.0717325	-1.0754	0.104408
ILMN_1216690	NM_173736.2	Samd11	mr-s; MGC38976; BC026991	Mus musculus sterile alpha motif domain containing 11 (Samd11), mRNA.	-1.1147	0.0355988	1.02529	0.0893277	-1.13274	0.183432		1.04357	0.0332475	-1.01659	0.0189492	1.16012	0.205333
ILMN_1216692	NM_053137.2	Pcdhb12	PcdhbL; Pcdhb5F	Mus musculus protocadherin beta 12 (Pcdhb12), mRNA.	-1.03105	0.119089	1.04682	0.143711	-1.08353	0.120609		-1.07355	0.116634	-1.1031	0.0891016	1.01267	0.0772591
ILMN_1216696	XM_985548.2	Syngap1		PREDICTED: Mus musculus synaptic Ras GTPase activating protein 1 homolog (rat) (Syngap1), mRNA.	-1.02874	0.115225	-1.03868	0.137448	1.00233	0.0338557		-1.02768	0.053333	1.03253	0.0309265	-1.01895	0.0269794
ILMN_1216697	XM_001006885.1	LOC674008		PREDICTED: Mus musculus similar to A-kinase anchor protein 5 (LOC674008), mRNA.	-1.14513	0.062273	-1.17581	0.0549003	-1.25254	0.256917		1.09	0.157826	-1.01419	0.0723317	1.08744	0.0666965
ILMN_1216698	XM_140499.7	Kcng2		PREDICTED: Mus musculus potassium voltage-gated channel, subfamily G, member 2 (Kcng2), mRNA.	1.02209	0.212921	1.04732	0.034951	-1.03822	0.196779		1.00426	0.141718	1.17207	0.149044	1.03167	0.177083
ILMN_1216700	AK037929	A130064M08Rik			-1.02118	0.0937509	-1.00605	0.150697	1.05588	0.264463		-1.06113	0.0609231	1.00078	0.0461553	1.14481	0.301447
ILMN_1216704	XM_358880.1	LOC385664			1.06257	0.163136	1.00695	0.0717658	-1.01679	0.0877948		-1.06426	0.0277686	-1.10175	0.0498542	-1.04614	0.0796417
ILMN_1216709	NM_030555	Pbx4			1.03538	0.186375	1.00151	0.155066	-1.01354	0.0212824		-1.03839	0.0185335	-1.10267	0.03132	-1.04809	0.0998479
ILMN_1216710	AK018331	6530409L22Rik			-1.01549	0.104864	-1.0225	0.0747739	-1.27582	0.121677		1.03505	0.0211219	1.04772	0.161118	-1.05297	0.191805
ILMN_1216713	AK010604	Mrpl15			-1.12512	0.0983704	-1.08577	0.0723275	-1.23545	0.0529352		-1.07175	0.0875866	-1.1452	0.0439545	-1.11673	0.06427
ILMN_1216714	XM_147203.1	8430401F14Rik			1.10204	0.0149294	1.06854	0.062708	-1.01025	0.0533386		-1.04468	0.102542	1.01769	0.0885678	-1.0572	0.15568
ILMN_1216715	AK030390	5330406H09Rik			-1.07951	0.0819423	-1.02602	0.205073	-1.11345	0.111246		-1.06505	0.0310184	-1.22238	0.0176289	-1.11084	0.119377
ILMN_1216717	NM_011771.1	Ikzf3	Zfpn1a3; 5830411O07Rik; Znfn1a3; Aiolos	Mus musculus IKAROS family zinc finger 3 (Ikzf3), mRNA. XM_915425 XM_923689 XM_923696 XM_923700 XM_923704 XM_983715 XM_983788 XM_983820 XM_983864 XM_983905	-1.15278	0.0375574	-1.04777	0.0500267	-1.01577	0.0166068		-1.05923	0.142636	-1.0292	0.0479182	-1.06142	0.0941143
ILMN_1216718	NM_011462.2	Spin1	AA673430; Spin; MGC27756; AA553322	Mus musculus spindlin 1 (Spin1), transcript variant 1, mRNA.	-1.0227	0.0757448	1.03014	0.098608	1.00177	0.348283		-1.187	0.112429	-1.17215	0.151854	-1.17068	0.208624
ILMN_1216720	NM_016704.1	C6	AW111623	Mus musculus complement component 6 (C6), mRNA.	2.32467	0.33058	3.25972	0.659797	2.33275	1.88933		2.32919	0.352502	4.37914	1.0989	5.38272	1.68226
ILMN_1216721	NM_007668.3	Cdk5	Crk6; AW048668	Mus musculus cyclin-dependent kinase 5 (Cdk5), mRNA.	1.0405	0.0983289	-1.10866	0.0312496	-1.09097	0.110056		1.07538	0.204189	-1.09063	0.0851145	-1.04956	0.168396
ILMN_1216722	NM_080845.1	Ftcd		Mus musculus formiminotransferase cyclodeaminase (Ftcd), mRNA.	-1.28085	0.0703383	-1.67707	0.160301	-1.62887	0.121352		-1.1704	0.173727	-2.04993	0.054007	-1.54055	0.0272651
ILMN_1216723	NM_175938.3	Btn2a2	D030063K05; Btn2	Mus musculus butyrophilin, subfamily 2, member A2 (Btn2a2), mRNA.	-1.21656	0.0920044	-1.14698	0.0948626	-1.22887	0.169474		-1.0002	0.0660929	-1.02697	0.0655689	1.01305	0.125569
ILMN_1216726	AY261333	Rapl			-1.00929	0.0440396	-1.10039	0.0546394	-1.00158	0.0844843		1.02559	0.0544763	1.02098	0.0682502	1.00379	0.00695008
ILMN_1216728	NM_029492.4	Zdhhc20	AI448102; B230110O18Rik; 5033406L14Rik; HK11	Mus musculus zinc finger, DHHC domain containing 20 (Zdhhc20), mRNA.	1.04625	0.284416	1.03875	0.068531	1.08408	0.3052		1.02163	0.0538791	1.04763	0.115878	-1.09927	0.289773
ILMN_1216732	NM_008562.3	Mcl1	Mcl-1; AW556805	Mus musculus myeloid cell leukemia sequence 1 (Mcl1), mRNA.	-1.18775	0.052874	1.24951	0.169877	1.30598	0.233216		1.11193	0.121013	1.55105	0.158438	1.51821	0.18029
ILMN_1216734	AK089985	Sfxn3			1.01102	0.12981	1.27082	0.119898	1.25945	0.0547541		1.02073	0.17389	1.23615	0.0816809	1.21191	0.0918245
ILMN_1216737	XM_357768.1	LOC384655			-1.1522	0.111657	-1.2627	0.110902	-1.06561	0.126069		-1.02329	0.151074	-1.12088	0.0783544	-1.11425	0.0773674
ILMN_1216740	AK088056	Nktr			-1.0388	0.164755	1.0755	0.192071	1.02886	0.426879		-1.14392	0.16979	1.17538	0.299446	1.28413	0.595316
ILMN_1216741	NM_011216.2	Ptpro	GLEPP1; PTPROt; PTP-phi; PTP-BK; PTP-U2	Mus musculus protein tyrosine phosphatase, receptor type, O (Ptpro), mRNA.	1.03067	0.155727	1.03368	0.134815	-1.13648	0.17888		1.01997	0.0783852	-1.08826	0.0914579	-1.03623	0.0836974
ILMN_1216742	NM_011641.1	Trp63	p51/p63; Ket; TAp63; p63; MGC115972; AI462811; Trp53rp1; Tp63; p73L	Mus musculus transformation related protein 63 (Trp63), mRNA.	-1.13915	0.0934152	-1.07872	0.0355714	1.21221	0.125364		1.2145	0.0762949	1.0027	0.076435	1.13714	0.0799543
ILMN_1216744	AK043584	Syn2			1.07978	0.0259191	-1.12819	0.101706	-1.08308	0.0554345		-1.07709	0.0185131	-1.15149	0.0652478	1.00991	0.049129
ILMN_1216745	AK011715	2610037M15Rik			-1.03976	0.0505872	-1.09857	0.119687	-1.05779	0.119146		-1.06151	0.00834345	1.00711	0.0536144	-1.01865	0.0185478
ILMN_1216746	NM_009735.2	B2m	Ly-m11; beta2-m	Mus musculus beta-2 microglobulin (B2m), mRNA.	1.06435	0.135731	-1.01712	0.11671	-1.00844	0.100709		1.04032	0.0702386	-1.01981	0.0548464	1.04924	0.0937836
ILMN_1216747		IGKV11-125_AJ231256_Ig_kappa_variable_11-125_15			-1.32571	0.0484327	2.90613	1.35217	3.0507	0.670904		1.07541	0.716959	4.09907	2.00064	3.31524	0.701424
ILMN_1216748	NM_134029.2	Nt5m	dNT-2; 2010013E09Rik; AI846937	Mus musculus 5',3'-nucleotidase, mitochondrial (Nt5m), nuclear gene encoding mitochondrial protein, mRNA.	1.24418	0.0603126	1.14113	0.168716	1.12121	0.151826		1.10027	0.0643995	1.01635	0.0800935	1.06614	0.331475
ILMN_1216751	NM_177769.4	Elmod1	4831417L10	Mus musculus ELMO domain containing 1 (Elmod1), mRNA. XM_924741	-1.15906	0.0829917	-1.25359	0.166416	-1.15002	0.171032		1.06874	0.200777	1.00966	0.0977675	1.05575	0.083322
ILMN_1216758	NM_013498.1	Crem	ICER	Mus musculus cAMP responsive element modulator (Crem), mRNA.	1.0994	0.07643	1.03935	0.162553	-1.04033	0.154678		1.03334	0.107135	-1.09381	0.0563144	-1.08297	0.104998
ILMN_1216762	AK041036	A530065H22Rik			-1.1325	0.154068	-1.4321	0.0691855	-1.26694	0.0828675		1.05305	0.301751	-1.06972	0.232893	-1.06946	0.131086
ILMN_1216763	NM_030147.2	Brd8	SMAP; 4432404P07Rik; 2610007E11Rik	Mus musculus bromodomain containing 8 (Brd8), mRNA.	1.16797	0.123015	1.12166	0.204107	1.14489	0.508292		-1.0087	0.181004	1.09628	0.140439	1.0467	0.133503
ILMN_1216764	NM_133662.2	Ier3	AI663993; cI-3; gly96; IEX-1	Mus musculus immediate early response 3 (Ier3), mRNA.	1.36024	0.304746	12.3086	1.08484	8.01352	1.89206		1.18674	9.0651	6.26791	6.77409	4.15886	3.77408
ILMN_1216770	NM_172532	Aldh5a1			1.00229	0.0940824	-1.00415	0.131587	-1.0552	0.0228134		1.05883	0.223477	-1.05776	0.065377	-1.0239	0.144844
ILMN_1216777	AK009232	2310008I22Rik			-1.1435	0.149679	-1.31601	0.100148	-1.24407	0.117678		1.00612	0.345877	-1.05303	0.204435	-1.16843	0.164846
ILMN_1216781	NM_001003955.2	Rab11fip5	RIP11; C75969; D6Ertd32e; mKIAA0857; GAF1; 9130206P09Rik	Mus musculus RAB11 family interacting protein 5 (class I) (Rab11fip5), transcript variant 1, mRNA.	1.13302	0.106646	3.10878	1.15218	3.7275	0.277086		1.37327	1.19375	4.23601	0.611174	3.38599	1.53554
ILMN_1216788	NM_172773.2	Slc17a5	SIASD; NSD; SLD; 4732491M05; SD; ISSD; AST; 4631416G20Rik; SIALIN	Mus musculus solute carrier family 17 (anion/sugar transporter), member 5 (Slc17a5), mRNA.	1.05481	0.0302299	1.15581	0.165867	1.07088	0.240268		-1.0052	0.155877	-1.06645	0.153688	-1.02684	0.199252
ILMN_1216791	NM_011262.3	Dpf2	2210010M07Rik; ubi-d4; Req	Mus musculus D4, zinc and double PHD fingers family 2 (Dpf2), mRNA.	1.00051	0.061314	1.13744	0.105454	-1.05848	0.108216		1.05596	0.0412809	-1.03526	0.145803	1.00904	0.144879
ILMN_1216792	AK078510	6820427D17Rik			-1.21277	0.088274	1.28747	0.271586	1.35537	0.0236419		-1.02615	0.256518	1.567	0.429252	1.67785	0.492237
ILMN_1216794	AK011964	2610302F08Rik			1.08419	0.0581899	1.16621	0.168944	-1.03497	0.105724		-1.01282	0.106424	-1.02821	0.101936	-1.03505	0.16244
ILMN_1216797	NM_028900.3	Gcc1	4932417P04Rik	Mus musculus golgi coiled coil 1 (Gcc1), mRNA.	1.0262	0.031926	1.06025	0.179537	1.00983	0.0700673		1.00599	0.106502	-1.14585	0.177562	-1.01505	0.0764801
ILMN_1216801	NM_025372.3	Tipin	1110018P21Rik; 1110005A05Rik	Mus musculus timeless interacting protein (Tipin), mRNA.	1.03085	0.113529	1.03876	0.0490534	1.04163	0.0904957		1.02391	0.0646577	1.12592	0.110757	1.07235	0.0192327
ILMN_1216802	NM_007522.2	Bad	Bbc2; AI325008	Mus musculus Bcl-associated death promoter (Bad), mRNA.	1.01909	0.141196	1.74529	0.312081	1.70982	0.137187		1.00491	0.430809	1.52057	0.214126	1.67347	0.385333
ILMN_1216803	NM_177197.4	Idi2	IPPI2; 4833405L16Rik	Mus musculus isopentenyl-diphosphate delta isomerase 2 (Idi2), mRNA.	1.03017	0.104176	-1.00214	0.127925	1.016	0.278814		1.02367	0.115382	1.21581	0.153216	1.12884	0.24686
ILMN_1216810	XM_357040.1	LOC383414			1.00276	0.0531871	-1.27059	0.0834717	-1.12127	0.0694691		-1.14237	0.132511	-1.44005	0.102399	-1.35362	0.152114
ILMN_1216812	NM_025898.3	Napa	1500039N14Rik; SNARE; RA81; AW209189; hyh; a-SNAP; SNAPA	Mus musculus N-ethylmaleimide sensitive fusion protein attachment protein alpha (Napa), mRNA.	1.06227	0.287985	-1.05955	0.064425	1.20816	0.360793		-1.24033	0.117277	-1.24709	0.144608	-1.43682	0.423941
ILMN_1216813	NM_027093.3	2310003L22Rik		Mus musculus RIKEN cDNA 2310003L22 gene (2310003L22Rik), mRNA.	-1.014	0.385376	-1.19925	0.297438	-1.11584	0.428317		-1.04877	0.346198	1.02023	0.249037	-1.07994	0.167371
ILMN_1216818	NM_172833.2	Malt1	MGC124469; A630046N12; MGC124470; D430033E09Rik	Mus musculus mucosa associated lymphoid tissue lymphoma translocation gene 1 (Malt1), mRNA.	1.06247	0.120365	1.30347	0.412013	1.18667	0.451772		1.10925	0.385576	1.58864	0.139878	1.25668	0.221505
ILMN_1216822	NM_178082.2	Insig2	2900053I11Rik; C730043J18Rik; Insig-2	Mus musculus insulin induced gene 2 (Insig2), mRNA.	1.10308	0.0574657	1.08576	0.399236	1.1158	0.472081		1.11377	0.129735	-1.61996	0.221763	-1.38093	0.1841
ILMN_1216823	NM_001081359.1	Ubr5	AW549941; mKIAA0896; 4432411E13Rik; C77315; D030042K14; Edd; Edd1	Mus musculus ubiquitin protein ligase E3 component n-recognin 5 (Ubr5), mRNA.	1.13886	0.151945	1.2217	0.0580531	-1.10781	0.14669		1.12922	0.072386	1.22977	0.132458	1.18633	0.288208
ILMN_1216825	XM_001471806.1	LOC100044166		PREDICTED: Mus musculus hypothetical protein LOC100044166 (LOC100044166), mRNA.	1.05376	0.116429	1.06343	0.20766	1.06732	0.210798		-1.12193	0.0756568	-1.11296	0.0658879	-1.12519	0.0162266
ILMN_1216827	XM_181410.4	6330503C17Rik			-1.00506	0.0579952	-1.01594	0.0447915	-1.02257	0.0400072		-1.05153	0.023336	-1.05119	0.0969485	-1.0755	0.0940639
ILMN_1216829	AK050559	C820018A03Rik			-1.2623	0.118405	-1.33027	0.0782075	-1.2453	0.0543239		-1.19136	0.104653	-1.2181	0.00853896	-1.19906	0.0234107
ILMN_1216836	NM_172600.2	6720456H20Rik	5930435P15	Mus musculus RIKEN cDNA 6720456H20 gene (6720456H20Rik), mRNA.	-1.00351	0.0942502	1.02732	0.00981675	-1.18538	0.169509		1.08278	0.0338634	1.00768	0.126684	-1.04566	0.0644211
ILMN_1216840	AK019457	3732412D22Rik			-1.0814	0.0877273	-1.03952	0.0900264	-1.09471	0.198877		-1.0328	0.0260295	-1.06588	0.0385789	-1.04221	0.152872
ILMN_1216842	NM_001039194.2	Aifm2	PRG3; Amid; D730001I10Rik; 5430437E11Rik	Mus musculus apoptosis-inducing factor, mitochondrion-associated 2 (Aifm2), nuclear gene encoding mitochondrial protein, transcript variant 3, mRNA.	1.00168	0.175505	1.00052	0.248833	-1.12251	0.194344		1.1598	0.151709	-1.22726	0.14287	-1.26338	0.141625
ILMN_1216843	NM_198831.1	Mrpl48	D4Ertd786e; CGI-118; 1810030E20Rik; 2610028L11Rik	Mus musculus mitochondrial ribosomal protein L48 (Mrpl48), transcript variant 2, mRNA.	1.06182	0.155364	1.08375	0.064702	-1.03643	0.0844518		1.01741	0.114973	1.07523	0.0514561	-1.12926	0.18764
ILMN_1216849	AK042095	Sp100			2.04918	0.456174	1.85025	0.987363	1.4706	0.547503		1.23167	0.247042	2.09346	0.293053	1.67162	0.0470926
ILMN_1216852	NM_011398.1	Slc25a14	UCP5L; UCP5S; UCP5; BMCP1	Mus musculus solute carrier family 25 (mitochondrial carrier, brain), member 14 (Slc25a14), nuclear gene encoding mitochondrial protein, mRNA.	-1.12414	0.0702831	1.10807	0.0207439	1.13891	0.055855		-1.01265	0.20244	1.04145	0.130331	1.20147	0.099588
ILMN_1216854	NM_001013012.1	Zfp787	2210018M03Rik	Mus musculus zinc finger protein 787 (Zfp787), mRNA.	-1.07013	0.0596491	-1.1443	0.0269826	1.05447	0.0335753		-1.04326	0.0787814	-1.02307	0.0689276	-1.04694	0.253751
ILMN_1216857	XM_001474320.1	LOC100040229		PREDICTED: Mus musculus hypothetical protein LOC100040229 (LOC100040229), mRNA.	-1.12225	0.110701	-1.02453	0.0742845	1.02431	0.0979939		1.03532	0.0770652	-1.03361	0.00276978	1.00763	0.0724243
ILMN_1216860	AK079675	A430006M23Rik			1.17168	0.0187523	1.15002	0.075873	1.01759	0.0927935		-1.06559	0.107391	1.10415	0.0709379	-1.03825	0.104732
ILMN_1216861	XM_358653.1	LOC381792			-1.14096	0.0486033	-1.2658	0.086355	-1.33214	0.0159049		1.03909	0.206199	-1.29409	0.0384458	-1.19826	0.113601
ILMN_1216863	XM_358726.1	LOC382321			-1.00868	0.0313876	-1.00252	0.15853	1.01948	0.101969		-1.013	0.0305259	-1.11163	0.0824892	1.00778	0.0824175
ILMN_1216864	NM_001085506.1	Magea10		Mus musculus melanoma antigen family A, 10 (Magea10), mRNA.	1.00832	0.0829966	-1.19412	0.062039	-1.10818	0.0945323		-1.02952	0.138656	-1.19793	0.0807609	-1.08154	0.0745154
ILMN_1216865	NM_030138.2	Centb2	mKIAA0041; 4832442G16; CNT-B2; ACAP2; 9530039J15Rik	Mus musculus centaurin, beta 2 (Centb2), mRNA.	-1.12858	0.0942328	1.00456	0.00536463	1.01534	0.0445002		1.12514	0.138482	1.19347	0.212197	1.11914	0.0816551
ILMN_1216867	AK050805	D030020M24Rik			-1.16621	0.0720452	-1.15796	0.0935295	-1.14564	0.0919997		-1.16458	0.0700654	-1.09761	0.0764402	-1.21339	0.0529547
ILMN_1216871	NM_008879.3	Lcp1	L-fimbrin; Pls2; D14Ertd310e; AW536232	Mus musculus lymphocyte cytosolic protein 1 (Lcp1), mRNA.	1.58083	0.375296	2.73778	0.392371	2.13257	0.135988		1.58669	0.724597	2.70894	0.246339	1.60728	0.571304
ILMN_1216872	AK078216	6430514I22Rik			1.0995	0.129586	-1.1889	0.185788	-1.07598	0.130579		-1.03642	0.0253393	1.00157	0.042603	1.1158	0.183305
ILMN_1216876	AK032984	6720484J09Rik			-1.02853	0.200482	-1.21151	0.0859516	-1.07618	0.19506		-1.06857	0.110783	-1.10773	0.0607864	-1.09262	0.100005
ILMN_1216880	NM_010130.3	Emr1	Ly71; EGF-TM7; F4/80; TM7LN3; Gpf480; DD7A5-7	Mus musculus EGF-like module containing, mucin-like, hormone receptor-like sequence 1 (Emr1), mRNA.	2.95754	0.735716	4.61722	1.36771	2.99789	1.56608		3.23256	0.886555	5.07988	0.867898	3.26368	0.855429
ILMN_1216882	NM_015784.2	Postn	Periostin; peri; AI747096; Osf2; PN; OSF-2	Mus musculus periostin, osteoblast specific factor (Postn), mRNA.	-1.19657	0.0225758	-1.09906	0.142244	-1.32372	0.298811		1.14064	0.120242	-1.02308	0.100205	1.08323	0.066318
ILMN_1216883	NM_027911.3	Raver1	KIAA1978; mKIAA1978; 1300006N24Rik; MGC118403	Mus musculus ribonucleoprotein, PTB-binding 1 (Raver1), mRNA.	1.03463	0.0930031	1.47098	0.0381482	1.40799	0.16854		-1.00984	0.269242	1.40156	0.142082	1.25578	0.59272
ILMN_1216885	NM_011027.2	P2rx7	AI467586	Mus musculus purinergic receptor P2X, ligand-gated ion channel, 7 (P2rx7), transcript variant 1, mRNA.	1.06568	0.151438	1.03541	0.207194	1.00483	0.0158975		-1.08479	0.00788072	-1.12544	0.0605614	-1.01353	0.0857361
ILMN_1216892	NM_028880.2	Lrrtm1	AW125451; 4632401D06Rik	Mus musculus leucine rich repeat transmembrane neuronal 1 (Lrrtm1), mRNA.	-1.06961	0.162577	-1.01457	0.113561	1.0615	0.0421831		1.03075	0.0940965	1.02689	0.190119	-1.12226	0.16637
ILMN_1216896	NM_175480	Zfp612			-1.00412	0.101272	-1.00359	0.172336	1.00316	0.0709886		1.23579	0.174178	1.13261	0.0927093	1.08248	0.105792
ILMN_1216897	AK076352	Prkch			1.15962	0.13362	1.09557	0.154779	1.12124	0.121678		1.00452	0.111107	1.01645	0.0501345	1.01233	0.229447
ILMN_1216898	AK047010	Kit			1.03184	0.0609088	1.11632	0.180284	1.17051	0.0699453		1.06548	0.0448402	1.24919	0.109032	1.15737	0.0713368
ILMN_1216900	NM_001042499.1	Rabl3	AA958834; 4930553C05Rik	Mus musculus RAB, member of RAS oncogene family-like 3 (Rabl3), mRNA.	1.11846	0.133159	1.02898	0.122658	1.0671	0.131893		1.06397	0.177576	1.34118	0.36058	1.1146	0.123906
ILMN_1216901	NM_178620.2	2600014M03Rik			1.03307	0.128115	1.0654	0.0727607	1.07144	0.0959535		1.04376	0.0279678	1.08725	0.111938	1.03601	0.0819077
ILMN_1216905	NM_029794.1	Cpsf4l	RP23-407I21.8; 1500000C01Rik; 0610010C04Rik	Mus musculus cleavage and polyadenylation specific factor 4-like (Cpsf4l), transcript variant 2, mRNA.	1.17607	0.0440433	1.2164	0.135442	1.05939	0.099317		1.03563	0.123317	1.04798	0.149185	1.22957	0.10459
ILMN_1216913	XM_147046.2	LOC245000			1.09492	0.129878	1.3068	0.081187	1.08774	0.110976		1.02836	0.135806	1.41426	0.175934	1.30237	0.434065
ILMN_1216915	NM_177047.3	Auts2	A730011F23Rik; D830032G16Rik; 2700063G02Rik	Mus musculus autism susceptibility candidate 2 (Auts2), mRNA.	-1.05573	0.191833	-1.02976	0.0660989	-1.04512	0.063523		1.0196	0.0950164	-1.11878	0.11212	-1.14842	0.141656
ILMN_1216916	AK077820	5930400O16Rik			1.08307	0.0935536	1.11366	0.149909	1.08118	0.0519009		-1.06227	0.0842474	1.0105	0.0599621	-1.07382	0.23901
ILMN_1216917	NM_183145.2	Zfp748	mszf54; MGC60742; KIAA4236; BC055310; mKIAA4236; 2610014M12Rik	Mus musculus zinc finger protein 748 (Zfp748), transcript variant 2, mRNA.	1.03401	0.0101091	-1.02027	0.0631839	1.0593	0.117982		1.0827	0.0101386	-1.16574	0.134994	1.10902	0.0309404
ILMN_1216919	NM_172596.1	Sec24c	2610204K03Rik; mKIAA0079	Mus musculus SEC24 related gene family, member C (S. cerevisiae) (Sec24c), mRNA.	1.2027	0.295089	1.30679	0.305844	1.11542	0.140312		-1.30255	0.358414	-1.11472	0.313034	1.03495	0.435566
ILMN_1216920	NM_026202.2	Ccdc50	C3orf6; AW048328; 2610529H08Rik	Mus musculus coiled-coil domain containing 50 (Ccdc50), transcript variant 1, mRNA.	1.05883	0.100818	1.23927	0.320915	-1.18722	0.251231		1.17165	0.115583	1.63223	0.256179	1.23025	0.255538
ILMN_1216924	AK032509	6430574F24Rik			1.02309	0.0565829	1.01736	0.135554	1.05661	0.113263		-1.06463	0.0071791	1.03999	0.0599624	1.0118	0.0744163
ILMN_1216929	NM_008672	Nap1l4			-1.14815	0.044186	-1.1981	0.0664684	-1.10088	0.0280564		-1.08398	0.0922805	-1.14714	0.0797221	-1.08076	0.10667
ILMN_1216930	NM_001081225.1	6030443O07Rik	AU014917; 3632432H19	Mus musculus RIKEN cDNA 6030443O07 gene (6030443O07Rik), mRNA.	-1.04499	0.0627611	1.01724	0.0886317	-1.20039	0.114333		-1.04047	0.0637894	-1.0534	0.0253458	-1.02238	0.0919592
ILMN_1216935	AK080904	2810439F02Rik			1.11971	0.0164277	-1.2982	0.141048	-1.33628	0.160939		1.02602	0.196911	-1.00819	0.183907	-1.01145	0.188814
ILMN_1216936	XR_004464.1	LOC672731		PREDICTED: Mus musculus similar to triosephosphate isomerase 1 (LOC672731), mRNA.	-1.0391	0.0787264	-1.12827	0.10504	-1.00947	0.174194		-1.14734	0.132905	-1.02417	0.0629102	-1.07477	0.0888975
ILMN_1216938	NM_145991.1	Cdc73	Hrpt2; MGC29274; C81219; MGC36559; 8430414L16Rik; BC027756; C130030P16Rik	Mus musculus cell division cycle 73, Paf1/RNA polymerase II complex component, homolog (S. cerevisiae) (Cdc73), mRNA.	1.00075	0.150868	1.09971	0.13389	1.07139	0.29627		-1.09264	0.201844	1.06447	0.149172	1.12184	0.123864
ILMN_1216939	NM_199257.1	Tpte	MGC130293; Pten2	Mus musculus transmembrane phosphatase with tensin homology (Tpte), mRNA.	-1.08343	0.0796242	-1.12128	0.133683	-1.04034	0.0429963		1.0357	0.121008	-1.11845	0.0753809	1.06045	0.168171
ILMN_1216948	NM_001004161.1	Gm1082		Mus musculus gene model 1082, (NCBI) (Gm1082), mRNA.	-1.05684	0.115177	-1.03547	0.0541258	-1.07536	0.0964248		1.10489	0.128563	1.00988	0.0875262	-1.03643	0.0786268
ILMN_1216950	NM_174996.2	D4Ertd22e	1110022I03; RP23-183L1.10	Mus musculus DNA segment, Chr 4, ERATO Doi 22, expressed (D4Ertd22e), transcript variant 2, mRNA.	1.02053	0.0851953	1.00974	0.0750095	-1.21262	0.0521483		-1.15988	0.148932	-1.19369	0.176269	-1.41308	0.241362
ILMN_1216951	XM_358710.1	LOC382136			1.03054	0.122083	1.11769	0.198173	1.02134	0.125579		-1.07709	0.113638	-1.17897	0.170887	-1.05306	0.0817118
ILMN_1216953	NM_001077638.1	Prmt2	MGC148245; Hrmt1l1; MGC148246; AI504737	Mus musculus protein arginine N-methyltransferase 2 (Prmt2), transcript variant 2, mRNA.	1.06429	0.253175	2.59956	0.45156	2.05875	0.682207		1.38222	0.901165	3.27382	0.340732	2.38368	0.701776
ILMN_1216954	NM_013632.3	Pnp1	AL024301; Np-2; Np; Np-1; AU015798	Mus musculus purine-nucleoside phosphorylase 1 (Pnp1), mRNA.	1.01995	0.161182	-1.01861	0.131449	-1.07674	0.10976		1.07415	0.182975	1.0071	0.0770753	-1.03276	0.146091
ILMN_1216962	NM_008457.2	Klk1b8	Nrpn; TADG14; MGC18615; mGK-8; Klk8	Mus musculus kallikrein 1-related peptidase b8 (Klk1b8), mRNA.	1.1665	0.110687	1.30187	0.308936	1.14088	0.709482		1.04722	0.109869	1.18722	0.310899	1.29851	0.169201
ILMN_1216965	AK041888	Angptl2			-1.00382	0.12294	-1.03121	0.05341	1.04207	0.0564563		-1.00998	0.0767764	-1.05289	0.0373256	1.0618	0.197058
ILMN_1216968	AK036030	9630028D01Rik			1.04426	0.0333219	-1.0977	0.0308783	-1.00213	0.0743079		1.05199	0.141484	-1.16071	0.048278	-1.13692	0.18761
ILMN_1216969	XM_484098	2900041M22Rik			-1.05806	0.0385194	-1.0124	0.127823	-1.10905	0.145386		-1.04438	0.0555228	-1.07342	0.0761632	-1.00501	0.037134
ILMN_1216970	NM_027882.2	Cic	mKIAA0306; 1200010B10Rik	Mus musculus capicua homolog (Drosophila) (Cic), mRNA.	-1.0553	0.0436508	1.09123	0.350688	1.35	0.0504916		1.01436	0.094913	1.35749	0.118263	1.25434	0.187718
ILMN_1216972	NM_019948.2	Clec4e	Clecsf9; C86253; Mincle	Mus musculus C-type lectin domain family 4, member e (Clec4e), mRNA.	1.09835	0.11475	5.39123	1.22751	2.71087	1.01398		1.11422	2.66176	2.21313	2.23552	1.6411	0.0855929
ILMN_1216985	NM_021448.2	Elp2	Statip1; Epl2; StIP1; AU023723	Mus musculus elongation protein 2 homolog (S. cerevisiae) (Elp2), mRNA.	1.19948	0.0778929	1.05848	0.0909232	1.10041	0.103507		-1.32028	0.207847	-1.18269	0.192955	-1.20554	0.21188
ILMN_1216987	NM_007379.2	Abca2	Abc2; mKIAA1062; AI413825; D2H0S1474E	Mus musculus ATP-binding cassette, sub-family A (ABC1), member 2 (Abca2), mRNA.	1.09113	0.111131	-1.25748	0.160194	-1.17012	0.0949379		-1.01844	0.178331	-1.36936	0.080546	-1.25798	0.277615
ILMN_1216989	XR_003498.1	LOC245576		PREDICTED: Mus musculus similar to phosphoribosyl pyrophosphate synthetase-associated protein 2 (LOC245576), mRNA.	1.00909	0.0131539	-1.05963	0.0232793	-1.09136	0.0739609		1.00663	0.159022	-1.02945	0.0471371	-1.08477	0.0288341
ILMN_1216991	AK039151	KOR1, GPCR			-1.08011	0.0285427	-1.06954	0.12884	-1.09635	0.120345		1.08815	0.0701913	-1.137	0.0285734	1.05987	0.0941291
ILMN_1216995	XM_975983.1	LOC665306		PREDICTED: Mus musculus hypothetical LOC665306 (LOC665306), mRNA.	-1.03999	0.0615511	-1.04831	0.0788811	1.04703	0.0148648		-1.02153	0.054448	-1.05118	0.045965	-1.02232	0.126012
ILMN_1217000	NM_023524.1	Tfpt	2400004F01Rik; FB1; Amida; AI450389	Mus musculus TCF3 (E2A) fusion partner (Tfpt), mRNA.	1.07834	0.116522	1.05283	0.167302	1.04699	0.082311		-1.2658	0.143096	-1.1305	0.0800797	-1.14296	0.339383
ILMN_1217003	NM_001081115.1	1190020J12Rik	Gm163	Mus musculus RIKEN cDNA 1190020J12 gene (1190020J12Rik), mRNA.	-1.07748	0.113106	-1.22668	0.174195	-1.07426	0.20787		1.20599	0.189725	1.10376	0.159643	1.11976	0.128369
ILMN_1217009	NM_134050.3	Rab15	2310012G06Rik; AI840042	Mus musculus RAB15, member RAS oncogene family (Rab15), mRNA.	-1.01965	0.0403132	3.40446	2.62412	4.00905	0.102228		1.34503	2.04117	6.15242	0.582599	2.87078	2.67577
ILMN_1217013	NM_007967.2	Evx2	Evx-2	Mus musculus even skipped homeotic gene 2 homolog (Evx2), mRNA.	-1.15511	0.125372	-1.24465	0.0444688	-1.26751	0.133074		-1.08264	0.0645428	-1.15673	0.0408701	-1.04623	0.198072
ILMN_1217018	XM_196801.3	LOC270763			1.03775	0.0744905	1.00289	0.125072	1.03873	0.0703981		-1.04498	0.0488862	1.02333	0.131992	1.03932	0.096415
ILMN_1217021	NM_053197.2	Sfxn3		Mus musculus sideroflexin 3 (Sfxn3), mRNA.	-1.08856	0.0352127	1.10196	0.0732036	1.03865	0.131532		-1.06463	0.0642185	1.08086	0.0853254	1.06587	0.153782
ILMN_1217023	XM_140204.7	Asxl3		PREDICTED: Mus musculus additional sex combs like 3 (Drosophila) (Asxl3), mRNA.	-1.09094	0.162366	1.11382	0.0470869	1.22526	0.045973		-1.02249	0.0815347	1.1808	0.141107	1.17882	0.111896
ILMN_1217029	NM_028236.1	Ceacam18	2010110O04Rik	Mus musculus CEA-related cell adhesion molecule 1 (Ceacam18), mRNA.	-1.01327	0.0775343	-1.1019	0.0616718	1.02107	0.0615288		-1.13055	0.0404437	-1.08526	0.0745548	-1.12384	0.15335
ILMN_1217032	AK052127	D230048P18Rik			1.92575	0.144777	3.74164	0.56429	2.11847	0.546579		2.1307	0.963112	4.11114	0.382103	3.01425	0.843119
ILMN_1217038	XR_002018.1	LOC667388		PREDICTED: Mus musculus similar to GLE1 RNA export mediator-like (yeast (LOC667388), mRNA.	-1.08089	0.108408	-1.04412	0.107515	-1.04813	0.104225		1.09564	0.0217633	-1.15178	0.0772914	-1.03228	0.0618485
ILMN_1217039	NM_175153.3	2010321M09Rik		Mus musculus RIKEN cDNA 2010321M09 gene (2010321M09Rik), transcript variant 1, mRNA.	1.1282	0.0911998	1.25904	0.0167179	1.14388	0.18789		1.08267	0.188245	1.2996	0.10701	1.11432	0.0899664
ILMN_1217040	NM_001081158.2	1300001I01Rik	mKIAA0664; RP23-194P5.1	Mus musculus RIKEN cDNA 1300001I01 gene (1300001I01Rik), mRNA.	-1.02879	0.0759896	-1.62957	0.130478	-1.12307	0.186732		-1.60376	0.0976773	-2.15914	0.0649618	-1.80706	0.309886
ILMN_1217041	NM_019388.2	Cd86	B7-2; Ly58; TS/A-2; B70; CLS1; B7.2; B7; MB7-2; Ly-58; MB7; Cd28l2	Mus musculus CD86 antigen (Cd86), mRNA.	2.16327	0.43835	2.34173	0.155535	1.18582	0.510948		2.17993	0.0319956	2.13963	0.229192	1.67467	0.335581
ILMN_1217043	XM_001478835.1	LOC100047762		PREDICTED: Mus musculus similar to Aspartate aminotransferase, cytoplasmic (Transaminase A) (Glutamate oxaloacetate transaminase 1) (LOC100047762), mRNA.	1.12938	0.621208	-1.96261	0.0765243	-1.76458	0.442647		1.16962	0.628268	-1.64918	0.169067	1.03853	0.36641
ILMN_1217046	NM_001039658.1	Mtl5	tesmin	Mus musculus metallothionein-like 5, testis-specific (tesmin) (Mtl5), transcript variant 2, mRNA.	1.0051	0.0979342	1.13984	0.0756034	1.10669	0.140842		1.00672	0.031814	1.09785	0.101322	1.10026	0.0848965
ILMN_1217054	AK018487	Ckmt1			1.04755	0.046487	1.08952	0.135588	1.1369	0.00515802		-1.00271	0.0420515	1.00986	0.11046	1.08165	0.149632
ILMN_1217055	XM_980542.1	Rab3gap2		PREDICTED: Mus musculus RAB3 GTPase activating protein subunit 2, transcript variant 4 (Rab3gap2), mRNA.	1.20295	0.148836	1.34137	0.107997	1.34828	0.131586		-1.07162	0.200016	1.19825	0.142548	1.15638	0.422229
ILMN_1217058	NM_144836.2	Slc17a2	MGC19073; RP23-480B19.3; NPT3; C730032N17Rik	Mus musculus solute carrier family 17 (sodium phosphate), member 2 (Slc17a2), mRNA.	-1.38881	0.0655504	-1.6752	0.212991	-1.66168	0.0970564		-1.17074	0.354354	-2.38645	0.0492171	-1.54788	0.222909
ILMN_1217060	NM_175466.2	Zfp770	6430601A21Rik	Mus musculus zinc finger protein 770 (Zfp770), mRNA.	-1.15233	0.0234263	-1.36183	0.147957	-1.46211	0.146289		1.03416	0.195619	1.03775	0.228222	-1.00555	0.303501
ILMN_1217061	NM_015733.4	Casp9	ICE-LAP6; Mch6; AW493809; Caspase-9; AI115399	Mus musculus caspase 9 (Casp9), mRNA.	-1.07906	0.0756086	-1.27512	0.138057	-1.17029	0.066128		-1.09199	0.143463	-1.06677	0.145155	-1.12144	0.0542267
ILMN_1217063	NM_153404.2	Liph	H06; P3; C130037N08Rik; lpd2; D16Wsu119e; PLA1B; lpd1; mPA-PLA1; Lpdlr	Mus musculus lipase, member H (Liph), transcript variant 2, mRNA.	-1.01137	0.0902052	1.03906	0.169963	1.07388	0.15303		1.04385	0.0215348	1.32487	0.232254	1.16213	0.0797365
ILMN_1217065	NM_027975.1	2310007D09Rik	BB104611; MGC92947	Mus musculus RIKEN cDNA 2310007D09 gene (2310007D09Rik), mRNA. XM_921817 XM_982681 XM_982712 XM_982744	1.17843	0.250716	1.94652	0.853555	2.01799	0.195884		1.08354	0.656273	2.7819	0.264052	1.81761	0.234605
ILMN_1217068	NM_026954.1	Tusc1	TSG-9; 2200001D17Rik	Mus musculus tumor suppressor candidate 1 (Tusc1), mRNA.	1.20805	0.147954	1.54464	0.210342	2.0846	0.647575		-1.00313	0.324146	1.12339	0.276108	1.08646	0.796404
ILMN_1217071	BC057926	Mmp16			-1.02038	0.0495821	-1.01287	0.10283	1.06593	0.0267997		1.11379	0.1321	1.06879	0.18614	1.00711	0.0789273
ILMN_1217072	NM_172306.2	Cyp4a12b	BC060945; Cyp4a12	Mus musculus cytochrome P450, family 4, subfamily a, polypeptide 12B (Cyp4a12b), mRNA.	-1.0382	0.0564406	-1.10127	0.061381	-1.164	0.0503161		1.06013	0.0796874	-1.01092	0.0462475	1.02041	0.165786
ILMN_1217074		Ubg			1.13562	0.102076	-1.02083	0.173411	-1.37159	0.155941		-1.1016	0.0253702	-1.24364	0.0556242	-1.25688	0.30171
ILMN_1217075	XM_125817.6	Bbs10		PREDICTED: Mus musculus Bardet-Biedl syndrome 10 (human), transcript variant 1 (Bbs10), mRNA.	-1.05399	0.0623791	-1.37443	0.155792	-1.40768	0.131839		-1.00745	0.180077	-1.63772	0.0241484	-1.4012	0.107668
ILMN_1217077	NM_010953.1	Oc90	PLA2L; Pla2ll; Ocn-95	Mus musculus otoconin 90 (Oc90), mRNA.	-1.00166	0.0802134	-1.15787	0.0757561	-1.12683	0.0711023		-1.12587	0.0396558	-1.12063	0.089516	-1.03899	0.090727
ILMN_1217084	XM_986799.1	1700016D18Rik		PREDICTED: Mus musculus RIKEN cDNA 1700016D18 gene (1700016D18Rik), mRNA.	1.05444	0.112966	1.05163	0.165917	1.05591	0.108324		-1.00616	0.0802648	-1.15497	0.10951	-1.04515	0.0639682
ILMN_1217085	XM_974172.2	EG224916		PREDICTED: Mus musculus predicted gene, EG224916 (EG224916), mRNA.	1.10703	0.143724	1.02551	0.103523	-1.03699	0.125704		-1.01017	0.0715714	-1.0762	0.0893947	1.02002	0.00648599
ILMN_1217097	NM_022021.1	Cables1	ik3-1; Cables	Mus musculus Cdk5 and Abl enzyme substrate 1 (Cables1), mRNA.	-1.16321	0.178565	-1.83767	0.032303	1.11305	0.203712		1.3863	0.52079	-1.4173	0.246386	-1.25445	0.265615
ILMN_1217098	NM_007878.2	Drd4	D4R; Drd-4; AW125663	Mus musculus dopamine receptor 4 (Drd4), mRNA.	1.00414	0.111216	-1.13526	0.139027	-1.19557	0.0927483		-1.14006	0.0442936	-1.02072	0.173122	-1.01469	0.190204
ILMN_1217100	NM_013633.2	Pou5f1	Otf3-rs7; Oct3/4; Otf-4; Oct-3; Oct-3/4; Otf4; Oct-4; Oct3; Oct4; Otf3; Otf3g; Otf-3	Mus musculus POU domain, class 5, transcription factor 1 (Pou5f1), mRNA.	-1.04949	0.108084	1.07467	0.153297	-1.03643	0.159777		1.24247	0.0824435	1.08159	0.0825381	1.2314	0.193276
ILMN_1217101	XM_001479179.1	LOC100042960		PREDICTED: Mus musculus similar to hCG28707 (LOC100042960), mRNA.	1.05019	0.138699	1.04749	0.210058	-1.07825	0.074155		-1.04895	0.0166444	-1.00313	0.193852	1.05214	0.0291096
ILMN_1217102	NM_145853.2	Tpcn1	5730403B01Rik; Tpc1; mKIAA1169	Mus musculus two pore channel 1 (Tpcn1), mRNA.	-1.12209	0.160864	-1.23893	0.146204	-1.22769	0.0212169		-1.13953	0.11615	-1.41832	0.0515119	-1.32265	0.207526
ILMN_1217106	XM_142533.2	LOC207731			-1.01772	0.110305	-1.09713	0.0991648	1.03214	0.138503		-1.09281	0.00650869	-1.15863	0.120294	-1.08676	0.0643401
ILMN_1217110	NM_008487.2	Arhgef2	P40; GEF; LFP40; mKIAA0651; AA408978; Lfc; Lbcl1; GEF-H1; GEFH1	Mus musculus rho/rac guanine nucleotide exchange factor (GEF) 2 (Arhgef2), mRNA.	1.10502	0.136993	1.2343	0.0377359	1.21622	0.0403997		-1.07449	0.117193	1.07381	0.174326	1.13215	0.124048
ILMN_1217111	XM_907012.2	LOC632784		PREDICTED: Mus musculus similar to Stretchin-Mlck CG18255-PA, isoform A (LOC632784), mRNA.	-1.04216	0.04883	-1.06886	0.0435786	-1.09672	0.0905812		1.00615	0.0843534	-1.10263	0.0171685	-1.02387	0.0421909
ILMN_1217117	AK040711	Cdon			1.02231	0.0249601	1.24362	0.164255	1.26748	0.0543564		1.01467	0.256044	1.04393	0.26638	1.23219	0.16976
ILMN_1217118	NM_032003.1	Enpp5	mKIAA4152; KIAA4152; D17Abb1e; AW061004	Mus musculus ectonucleotide pyrophosphatase/phosphodiesterase 5 (Enpp5), mRNA.	-1.08926	0.384136	-1.33338	0.108512	-1.12582	0.309472		-1.15502	0.295374	-1.47867	0.172143	-1.13978	0.248045
ILMN_1217120	NM_001033291.2	Usp40	B230215L03Rik; C730029K03	Mus musculus ubiquitin specific peptidase 40 (Usp40), mRNA.	-1.17255	0.12004	-1.29084	0.0355624	-1.30505	0.0740985		-1.14826	0.0862916	-1.23254	0.0689419	-1.33753	0.0598427
ILMN_1217123	NM_011770.3	Ikzf2	Helios; Zfpn1a2; Znfn1a2	Mus musculus IKAROS family zinc finger 2 (Ikzf2), mRNA.	-1.01882	0.0599439	1.05195	0.120349	1.10129	0.0234327		1.101	0.0844401	1.02252	0.0819332	1.04155	0.231292
ILMN_1217128	XM_354717	Igh-VS107			1.01352	0.220455	1.86194	1.12308	3.08046	1.90567		-1.09185	0.516852	1.11702	0.45617	1.03144	1.78901
ILMN_1217129	NM_178886.2	Ldlrad3	AI194318; 6430500P08	Mus musculus low density lipoprotein receptor class A domain containing 3 (Ldlrad3), mRNA.	-1.02061	0.108853	-1.04011	0.108588	-1.19067	0.0385993		-1.0765	0.0241833	-1.15388	0.0698155	-1.01934	0.143098
ILMN_1217133	NM_029472.1	Gstt4	4930583C14Rik; AI507011	Mus musculus glutathione S-transferase, theta 4 (Gstt4), mRNA.	-1.00779	0.111676	1.01866	0.0272982	-1.0254	0.197282		1.08509	0.0523767	1.12924	0.0287889	1.05658	0.0353238
ILMN_1217139	XR_034378.1	LOC668863		PREDICTED: Mus musculus similar to ribosomal protein (LOC668863), misc RNA.	-1.01274	0.0378948	-1.1312	0.0911325	-1.07081	0.0803121		-1.0033	0.186088	-1.08397	0.177684	-1.04282	0.142833
ILMN_1217143	NM_145442.1	Mbip	MGC7681; 4933408E06Rik	Mus musculus MAP3K12 binding inhibitory protein 1 (Mbip), mRNA.	1.10911	0.302779	-1.07708	0.0769403	-1.06537	0.286362		-1.0329	0.134799	1.01155	0.111568	1.04276	0.244854
ILMN_1217144	NM_028162.2	Tbc1d5	1600014N05Rik; KIAA0210; mKIAA0210	Mus musculus TBC1 domain family, member 5 (Tbc1d5), mRNA.	1.07301	0.22471	1.09984	0.0670146	1.06768	0.139142		1.10172	0.0375255	1.16344	0.158178	1.08246	0.175616
ILMN_1217147	AK048425	C130060B01Rik			-1.0666	0.0977018	1.0678	0.0522411	-1.00261	0.159093		1.01649	0.0230583	1.10581	0.0730073	-1.01742	0.161348
ILMN_1217148		6530406A20Rik			-1.12932	0.0486064	-1.24496	0.0446247	-1.0853	0.0805066		-1.07404	0.156896	-1.23023	0.174181	-1.06277	0.0702092
ILMN_1217150	NM_152807.3	Ccdc137	3110023B02Rik; RP23-82I5.10	Mus musculus coiled-coil domain containing 137 (Ccdc137), mRNA.	-1.1105	0.122628	-1.10051	0.086929	-1.10327	0.094849		-1.11162	0.153654	-1.05453	0.237549	-1.01549	0.25892
ILMN_1217151	XM_357879.1	LOC384818			-1.02437	0.0996716	-1.05821	0.0458161	-1.03413	0.0728061		-1.07535	0.0451796	-1.04971	0.0358556	1.02458	0.05572
ILMN_1217153	NM_181070.4	Rab18	AA959686	Mus musculus RAB18, member RAS oncogene family (Rab18), mRNA.	-1.03126	0.00962397	-1.19702	0.0490828	-1.28158	0.123496		-1.04056	0.338407	-1.05217	0.296549	1.09051	0.47605
ILMN_1217159	XM_895783.2	Lmo7		PREDICTED: Mus musculus LIM domain only 7, transcript variant 11 (Lmo7), mRNA.	-1.11599	0.256433	-1.55238	0.138055	-1.7524	0.17676		1.01087	0.291971	-1.30811	0.111739	-1.26954	0.234189
ILMN_1217164	NM_029022.1	Scrn3	Ses3; AI427019; AV002033; 4833415E20Rik	Mus musculus secernin 3 (Scrn3), mRNA.	-1.06499	0.033986	-1.14551	0.196642	-1.05419	0.0721895		-1.11539	0.0329095	-1.2853	0.0393444	-1.15166	0.152168
ILMN_1217167	AK018389	8430406N16Rik			-1.04651	0.16659	-1.01467	0.0925971	-1.11373	0.105057		-1.0271	0.0763327	-1.12433	0.0569707	-1.01603	0.0699575
ILMN_1217174	NM_177089.3	B230378H13Rik			1.05563	0.0806843	1.21459	0.179091	1.16373	0.0666523		1.07255	0.0685464	1.13849	0.121845	1.15663	0.149681
ILMN_1217180	NM_026820.2	Ifitm1	1110036C17Rik; MGC107121; Mil2	Mus musculus interferon induced transmembrane protein 1 (Ifitm1), mRNA.	1.52872	0.158246	1.31408	0.0592371	1.29441	0.098616		1.22676	0.0939394	1.11114	0.165878	1.11971	0.32152
ILMN_1217184	NM_172262.1	Aof1	4632428N09Rik; AI482520; MGC38211	Mus musculus amine oxidase, flavin containing 1 (Aof1), mRNA.	-1.09197	0.131434	-1.39802	0.0397415	-1.31903	0.105835		-1.08596	0.231694	-1.31424	0.116617	-1.36278	0.0120345
ILMN_1217191	NM_019445.1	Fmn2	AU024104	Mus musculus formin 2 (Fmn2), mRNA.	1.16034	0.0337833	1.16031	0.287189	1.53064	0.512009		1.44758	0.195958	1.02928	0.156116	1.23887	0.147049
ILMN_1217197	AK048842	C230074J23Rik			1.02597	0.109376	1.00915	0.0869871	-1.09652	0.0853822		-1.07238	0.0529343	-1.0239	0.0676459	1.0072	0.0335024
ILMN_1217199	NM_177596.3	EG210853	6720451E15; MGC141638	Mus musculus predicted gene, EG210853 (EG210853), mRNA.	-1.10387	0.118926	-1.08964	0.0499241	-1.16746	0.0867118		1.05061	0.175952	-1.05033	0.109135	-1.06952	0.0559075
ILMN_1217213	NM_018852.2	Scn9a	Scn1a; mKIAA4197; Nav1.7; PN1; KIAA4197	Mus musculus sodium channel, voltage-gated, type IX, alpha (Scn9a), mRNA. XM_899677 XM_899685 XM_908593 XM_920936 XM_920944 XM_920951 XM_920969 XM_920980	1.0156	0.0706247	1.05558	0.081338	1.06423	0.14767		1.02316	0.0362755	-1.01873	0.0754925	1.17191	0.112045
ILMN_1217214	AK040115	Cd4			-1.02782	0.21321	-1.21817	0.154638	-1.08228	0.136469		1.07694	0.204255	-1.08552	0.1242	1.01772	0.221552
ILMN_1217219	XM_914270.2	Cnot1		PREDICTED: Mus musculus CCR4-NOT transcription complex, subunit 1, transcript variant 16 (Cnot1), mRNA.	-1.03673	0.209117	-1.07964	0.0627472	1.01926	0.378044		-1.07264	0.121549	-1.1894	0.165956	-1.15256	0.160877
ILMN_1217222	XM_001475101.1	LOC100040701		PREDICTED: Mus musculus hypothetical protein LOC100040701 (LOC100040701), mRNA.	-1.16815	0.0303001	-1.15246	0.122325	-1.2194	0.14157		-1.11151	0.0801786	-1.08098	0.119606	-1.05631	0.0649729
ILMN_1217225	NM_025911.2	Ccdc91	1700086G08Rik; AW555238; AU045683; 1810060J02Rik	Mus musculus coiled-coil domain containing 91 (Ccdc91), mRNA.	-1.07414	0.0715125	-1.40778	0.0344423	-1.34318	0.0670213		1.03549	0.191801	-1.21319	0.118721	-1.11076	0.164386
ILMN_1217234	AK049200	Ttk			-1.15963	0.0526665	-1.05726	0.0768999	-1.10251	0.0892566		-1.06985	0.0859032	-1.10963	0.0581224	-1.06404	0.054324
ILMN_1217235	NM_026667.2	9130005N14Rik	1190001N04Rik; Noxp20; MGC117924	Mus musculus RIKEN cDNA 9130005N14 gene (9130005N14Rik), mRNA.	1.20666	0.493956	1.37314	0.343875	1.4762	0.728986		-1.03336	0.556956	1.49407	0.410145	1.72376	0.532879
ILMN_1217236	XR_002499.1	LOC633945		PREDICTED: Mus musculus hypothetical LOC633945 (LOC633945), mRNA.	-1.16743	0.341106	-1.24766	0.189796	-1.01046	0.460688		-1.66978	0.368104	-1.40462	0.349828	-1.46134	0.166213
ILMN_1217241	NM_182782.1	Klhl25	MGC36331; 2810402K13Rik; BC027373	Mus musculus kelch-like 25 (Drosophila) (Klhl25), mRNA.	1.28809	0.153926	1.87147	0.119026	2.04565	0.620541		-1.04182	0.648208	1.53043	0.398267	1.35564	0.27342
ILMN_1217243	XM_001476908.1	LOC100046852		PREDICTED: Mus musculus hypothetical protein LOC100046852 (LOC100046852), mRNA.	1.01388	0.0598816	-1.0138	0.0346179	-1.05305	0.028212		1.01677	0.100708	-1.04923	0.0343124	1.01899	0.0945886
ILMN_1217244	NM_177816.2	D030001E08			-1.04367	0.0528564	-1.03972	0.0370653	-1.0499	0.0058803		-1.00105	0.022334	-1.18788	0.146344	-1.08376	0.0658762
ILMN_1217245	XM_357921.1	LOC384890			1.00851	0.161082	-1.04568	0.02656	-1.00461	0.0483289		-1.05551	0.0969904	-1.01408	0.0705908	1.0611	0.0271518
ILMN_1217246	NM_178117.2	BC035947			-1.01064	0.163982	1.00111	0.0164808	-1.08379	0.0355877		-1.02756	0.0673909	-1.00142	0.116804	-1.00498	0.147344
ILMN_1217247	AK043123	Metapl1			1.04355	0.152049	-1.03893	0.118641	-1.08398	0.304203		-1.09145	0.0642512	-1.1775	0.134149	-1.13606	0.257095
ILMN_1217248	AK087443	Ncoa2			1.02038	0.0810498	1.09749	0.181097	1.06304	0.180447		-1.10594	0.174348	-1.20433	0.226067	-1.0297	0.114927
ILMN_1217252	AK002422	2510002J07Rik			1.22063	0.135831	1.05333	0.291253	1.04045	0.0799889		-1.2879	0.0929144	-1.31268	0.143384	-1.17078	0.265623
ILMN_1217254	NM_181415.3	Atrnl1	Alp; AW555641; Atrnlp; AI504415; Atrnl	Mus musculus attractin like 1 (Atrnl1), mRNA.	1.00999	0.088374	1.04779	0.134697	1.05976	0.117907		1.04989	0.0931363	-1.03145	0.0487325	1.05589	0.100882
ILMN_1217262	NM_024231.2	Zfpl1	1500015B20Rik	Mus musculus zinc finger like protein 1 (Zfpl1), mRNA.	1.09865	0.115044	1.05338	0.0786876	1.2029	0.0527309		-1.08403	0.110092	-1.13071	0.176334	-1.09458	0.388318
ILMN_1217268	XM_357936.1	LOC384909			1.04482	0.079503	1.01465	0.114504	-1.03671	0.0503741		-1.10382	0.0833047	-1.14112	0.0662671	-1.04382	0.116591
ILMN_1217271	NM_177239.1	C130067A03Rik			-1.21228	0.122567	-1.13369	0.150944	-1.15615	0.105597		-1.04777	0.0484227	1.00828	0.139001	1.17996	0.346747
ILMN_1217272	NM_025494.2	Atp6v1c1	1700025B18Rik; U13839	Mus musculus ATPase, H+ transporting, lysosomal V1 subunit C1 (Atp6v1c1), mRNA.	1.0021	0.179204	1.187	0.22032	1.01605	0.0903264		1.07258	0.0490585	1.57702	0.241979	1.24623	0.21149
ILMN_1217275	NM_009222.3	Snap23	Syndet; 23kDa; Sndt; SNAP-23; AA408749	Mus musculus synaptosomal-associated protein 23 (Snap23), mRNA.	-1.0313	0.177386	-1.03497	0.0485822	-1.03656	0.0523946		-1.03369	0.107625	-1.06852	0.0902753	-1.03886	0.0969419
ILMN_1217276	NM_016845.1	Acrbp	OY-TES-1; sp32	Mus musculus proacrosin binding protein (Acrbp), mRNA.	1.02187	0.0954345	1.03643	0.0648301	-1.11649	0.119961		-1.03319	0.0389109	-1.03665	0.101775	-1.00044	0.0650375
ILMN_1217278	XM_916275.1	EG384187		PREDICTED: Mus musculus predicted gene, EG384187 (EG384187), mRNA.	1.05519	0.0676871	1.02801	0.0755585	-1.07948	0.216841		1.00666	0.166302	1.07339	0.0775666	1.00915	0.0145484
ILMN_1217280	XM_128478.6	4930528F23Rik		PREDICTED: Mus musculus RIKEN cDNA 4930528F23 gene (4930528F23Rik), mRNA.	-1.343	0.123445	-2.47924	0.0996941	-2.58264	0.0261301		-1.05665	0.352162	-2.72464	0.0438891	-2.07358	0.157211
ILMN_1217296	NM_012003.1	Cops7a	D6Ertd35e	Mus musculus COP9 (constitutive photomorphogenic) homolog, subunit 7a (Arabidopsis thaliana) (Cops7a), mRNA.	-1.0372	0.189443	-1.16386	0.161694	-1.11898	0.139359		-1.21108	0.100103	-1.37476	0.0572232	-1.43474	0.218813
ILMN_1217298	NM_144518.3	2900011O08Rik		Mus musculus RIKEN cDNA 2900011O08 gene (2900011O08Rik), mRNA.	-1.13048	0.119814	-1.21519	0.0874936	-1.19672	0.229742		1.0913	0.176605	-1.14234	0.184753	-1.0274	0.0628399
ILMN_1217300	AK054337	E330017C12Rik			1.03341	0.0204564	-1.10158	0.0348817	-1.15946	0.069397		-1.01025	0.12657	-1.14023	0.0523546	-1.15319	0.112334
ILMN_1217302	NM_009211.2	Smarcc1	BAF155; AI115498; Rsc8; SRG3	Mus musculus SWI/SNF related, matrix associated, actin dependent regulator of chromatin, subfamily c, member 1 (Smarcc1), mRNA.	-1.01028	0.0190769	1.11448	0.173841	-1.31559	0.0497876		-1.11785	0.253648	-1.25744	0.298521	-1.34556	0.0702361
ILMN_1217304	AK034531	9430001M03Rik			1.01144	0.113743	-1.04787	0.0505824	-1.02735	0.143924		1.19866	0.107214	1.03606	0.0371973	1.13022	0.0432058
ILMN_1217305	AK037468	Odf2			1.07115	0.10723	1.16329	0.119235	1.32846	0.212015		1.15814	0.0440889	1.02428	0.0856729	1.13512	0.111339
ILMN_1217308	NM_010644.1	Klk1b26	mGK26; PRECE-2; Klk26; mGK-26; Egfbp2	Mus musculus kallikrein 1-related petidase b26 (Klk1b26), mRNA.	-1.14988	0.0332445	-1.1099	0.0290386	-1.17072	0.13437		1.03698	0.0958457	-1.10216	0.0269924	-1.12598	0.0700125
ILMN_1217309	NM_029564.2	Tax1bp3	RP23-263M10.10; 1300011C24Rik; TIP-1	Mus musculus Tax1 (human T-cell leukemia virus type I) binding protein 3 (Tax1bp3), mRNA.	1.0726	0.093573	1.81179	0.326469	1.79133	0.289144		1.18248	0.402243	2.02065	0.119084	1.79585	0.264237
ILMN_1217310	XM_355118.1	LOC381189			1.0793	0.0366279	1.0208	0.057457	1.04582	0.0641551		1.11711	0.0648736	-1.06008	0.0403239	1.00551	0.0338302
ILMN_1217312	XM_485069	4921508D12Rik			1.11975	0.154002	1.10895	0.225266	1.04735	0.0631127		-1.02595	0.0648248	-1.08136	0.147037	-1.05555	0.175586
ILMN_1217313	XR_034927.1	Tsga10ip		PREDICTED: Mus musculus testis specific 10 interacting protein (Tsga10ip), misc RNA.	1.0483	0.0481102	-1.02315	0.0967085	-1.05167	0.116435		-1.06469	0.0749652	-1.17109	0.117758	-1.11985	0.0563381
ILMN_1217316	AK017705	5730478M09Rik			1.01002	0.0653165	-1.0286	0.18077	-1.17717	0.0671477		1.07192	0.172289	-1.09885	0.199994	-1.10726	0.0324507
ILMN_1217319	NM_026153.2	5730557B15Rik	0610012A05Rik	Mus musculus RIKEN cDNA 5730557B15 gene (5730557B15Rik), transcript variant 1, mRNA.	-1.01984	0.108162	-1.05675	0.105686	-1.05685	0.0653684		-1.11977	0.147728	-1.17807	0.0422745	-1.13091	0.179316
ILMN_1217320	NM_019519.2	Rabggta	gm	Mus musculus Rab geranylgeranyl transferase, a subunit (Rabggta), mRNA.	-1.03033	0.283074	1.05253	0.13295	1.04768	0.257957		-1.00549	0.100561	-1.03097	0.1005	-1.01076	0.0722188
ILMN_1217328	NM_010465.2	Hoxc6	Hox-6.1; Hox-3.3	Mus musculus homeo box C6 (Hoxc6), mRNA.	-1.59073	0.0774536	-1.16576	0.124188	-1.25174	0.0992547		1.26384	0.138448	1.07225	0.111774	1.01134	0.137293
ILMN_1217329	NM_029012.2	Sppl3	MGC90867; Usmg3; Psl4; 4833416I09Rik	Mus musculus signal peptide peptidase 3 (Sppl3), mRNA.	-1.08295	0.0640527	1.09725	0.138497	1.40204	0.1273		1.02499	0.0790233	1.19915	0.0112683	1.13605	0.47864
ILMN_1217330	AK018125	Gfm			-1.03722	0.0285407	-1.43569	0.0844999	-1.44798	0.0342807		-1.10105	0.0820861	-1.22192	0.067756	-1.40298	0.108057
ILMN_1217331	NM_008567.1	Mcm6	ASP-l1; Mcmd6; D1Wsu22e	Mus musculus minichromosome maintenance deficient 6 (MIS5 homolog, S. pombe) (S. cerevisiae) (Mcm6), mRNA.	-1.1047	0.0395674	-1.09832	3.30732	1.00759	1.30236		1.32048	0.509214	4.56599	1.9184	2.58809	0.849686
ILMN_1217334	XM_146734.1	Olfr902			-1.08937	0.0519149	-1.13332	0.0706143	-1.12338	0.104306		1.09046	0.140823	1.05933	0.247781	1.17861	0.211078
ILMN_1217337	NM_134041.2	4930427A07Rik	AA536649; FLJ00116; mFLJ00116	Mus musculus RIKEN cDNA 4930427A07 gene (4930427A07Rik), mRNA.	-1.06264	0.157839	1.15705	0.463934	-1.00957	0.351661		1.1072	0.165246	1.70746	0.275817	1.18453	0.0991305
ILMN_1217341	NM_009968.1	Cryz	Sez9	Mus musculus crystallin, zeta (Cryz), mRNA.	-1.44503	0.0782319	-2.1216	0.0184493	-1.84248	0.0630593		-1.07607	0.332805	-1.94771	0.094168	-1.83887	0.040486
ILMN_1217343	XM_127403.2	LOC328272			-1.01744	0.15748	-1.06008	0.123976	-1.12967	0.140314		-1.00925	0.107364	1.10896	0.164345	1.01457	0.0875126
ILMN_1217344	NM_177644.4	Rasal2	A330066M24Rik; 6530401P13	Mus musculus RAS protein activator like 2 (Rasal2), mRNA.	-1.16502	0.110985	-1.07495	0.0632148	-1.39812	0.142034		-1.08174	0.114233	-1.04635	0.156713	-1.11399	0.122511
ILMN_1217350	NM_001081227.1	6330403A02Rik	R75555	Mus musculus RIKEN cDNA 6330403A02 gene (6330403A02Rik), mRNA.	-1.11327	0.058021	-1.08509	0.0904053	-1.08356	0.038118		1.05899	0.0400452	-1.07027	0.110157	-1.03153	0.0527356
ILMN_1217352	NR_003624.1	EG381806		Mus musculus predicted gene, EG381806 (EG381806) on chromosome 6.	1.03735	0.247968	-1.17268	0.259528	-1.48419	0.314496		-1.11537	0.198494	-1.94228	0.104292	-1.15593	0.409306
ILMN_1217353	NM_009056.1	Rfx2	5430432H19Rik	Mus musculus regulatory factor X, 2 (influences HLA class II expression) (Rfx2), mRNA.	-1.30691	0.07548	1.00429	0.0963065	1.05907	0.222032		1.14708	0.210892	1.11444	0.0665419	1.24866	0.0754006
ILMN_1217358	XM_001472258.1	Nova1		PREDICTED: Mus musculus neuro-oncological ventral antigen 1, transcript variant 1 (Nova1), mRNA.	-1.0369	0.112956	-1.05402	0.0681698	-1.028	0.0461752		1.1086	0.0638888	-1.0141	0.118725	1.03812	0.0425038
ILMN_1217360	NM_023651.4	Pex13	2610008O20Rik	Mus musculus peroxisomal biogenesis factor 13 (Pex13), mRNA.	1.0251	0.0704518	-1.49046	0.0737828	-1.43502	0.229194		-1.03266	0.198629	-1.45115	0.0619039	-1.52471	0.151032
ILMN_1217361	NM_173410.3	Gpr26	9630036A11Rik; A730021D22	Mus musculus G protein-coupled receptor 26 (Gpr26), mRNA.	-1.06561	0.0247718	1.02071	0.0715639	-1.06374	0.0877951		1.03506	0.04794	-1.04567	0.0135386	1.00801	0.179723
ILMN_1217363	NM_025978.3	Ttc14	4931403I22Rik; AU014779; 2700016E08Rik; AI662468; 4930434D01Rik; KIAA1980; AW561908; cI-44; mKIAA1980; 4933402I15Rik	Mus musculus tetratricopeptide repeat domain 14 (Ttc14), transcript variant 2, mRNA.	1.1833	0.105543	1.10136	0.0994853	-1.2163	0.0513938		1.05141	0.0836661	-1.00097	0.199895	-1.04113	0.284466
ILMN_1217367	AK039399	A330039C13Rik			1.08181	0.131725	-1.01833	0.114317	-1.09893	0.0259011		-1.07916	0.0959435	1.12132	0.21397	-1.10671	0.0131725
ILMN_1217369	XM_126505.1	1100001J08Rik			-1.10398	0.0830225	-1.1503	0.21501	-1.31801	0.147089		-1.14359	0.0309948	-1.0201	0.0547503	-1.04145	0.11822
ILMN_1217371	XM_354815.1	LOC380902			1.02364	0.0556563	-1.03201	0.0945714	1.19483	0.021039		-1.03964	0.0244665	-1.07512	0.0638473	1.04924	0.173607
ILMN_1217372	AK002335	Tpmt			-1.05629	0.102035	-1.24382	0.128295	-1.52192	0.0748331		-1.08394	0.145328	-1.42867	0.0371085	-1.13177	0.369657
ILMN_1217373	XR_035258.1	4933427E11Rik		PREDICTED: Mus musculus RIKEN cDNA 4933427E11 gene (4933427E11Rik), misc RNA.	-1.00557	0.0509984	1.01051	0.0880097	-1.02095	0.0630905		1.06951	0.064199	1.00661	0.117372	1.01749	0.0931281
ILMN_1217377	XM_973798.1	LOC674334		PREDICTED: Mus musculus similar to hCG2011852 (LOC674334), mRNA.	-1.04935	0.0549697	-1.04331	0.0843442	-1.11972	0.0413188		1.03436	0.113814	-1.10422	0.0250283	-1.14526	0.0690199
ILMN_1217378	NM_011220.2	Pts	PTPS	Mus musculus 6-pyruvoyl-tetrahydropterin synthase (Pts), mRNA.	-1.24738	0.0479805	-1.81369	0.0265772	-1.83927	0.13086		1.15943	0.447861	-1.27986	0.25059	-1.29332	0.229246
ILMN_1217386	AK040132	A430068O14Rik			-1.08378	0.0449567	-1.08384	0.124402	-1.03541	0.0343346		-1.06094	0.0573884	1.0985	0.170528	-1.01796	0.0816106
ILMN_1217389	NM_001039050.1	Pkib	PKIbeta; Prkacn2	Mus musculus protein kinase inhibitor beta, cAMP dependent, testis specific (Pkib), transcript variant 2, mRNA.	1.75957	0.189467	2.38562	1.56742	1.65673	0.830952		1.74448	0.0314331	4.48515	1.42323	3.04476	0.880879
ILMN_1217391	NM_009173.1	Siah1b	AA960570; Sinh1b	Mus musculus seven in absentia 1B (Siah1b), mRNA.	-1.14332	0.0219225	-1.04875	0.0689214	-1.02687	0.131623		1.07933	0.128718	1.04823	0.0896338	-1.00425	0.0403735
ILMN_1217396	NM_026654.1	4930584N22Rik			1.02357	0.0960849	1.04418	0.0935489	1.05279	0.0765165		1.06252	0.0189877	1.03051	0.166793	-1.00177	0.135115
ILMN_1217403	NM_030074.2	Zfp687	4931408L03Rik; mKIAA1441	Mus musculus zinc finger protein 687 (Zfp687), mRNA.	1.08787	0.282385	-1.12312	0.107635	-1.01451	0.296333		-1.11799	0.0475414	-1.12838	0.0372076	-1.09288	0.0864566
ILMN_1217406	NM_001014995.1	1110013L07Rik		Mus musculus RIKEN cDNA 1110013L07 gene (1110013L07Rik), mRNA.	1.24669	0.0902457	1.4564	0.24408	1.52484	0.166283		1.22679	0.131683	1.54256	0.059932	1.26107	0.517305
ILMN_1217408	NM_011100.3	Prkacb	Pkacb	Mus musculus protein kinase, cAMP dependent, catalytic, beta (Prkacb), mRNA.	1.04297	0.043956	1.00468	0.104287	-1.2118	0.208897		1.15873	0.106673	-1.09651	0.0900008	1.01536	0.115172
ILMN_1217410	AK031350	Gtar-pending			-1.06257	0.0491301	-1.08384	0.0273399	-1.03451	0.0593528		-1.0174	0.0321821	-1.00144	0.0761073	-1.04449	0.0578968
ILMN_1217412	NM_001031772.1	Lin28b	2810403D23Rik; Lin-28.2; D030047M17Rik	Mus musculus lin-28 homolog B (C. elegans) (Lin28b), mRNA.	-1.04837	0.0270292	-1.122	0.059072	-1.04569	0.0456834		-1.08596	0.112523	-1.08138	0.060144	-1.06391	0.0181712
ILMN_1217413	AK054530	E330037N08Rik			-1.12858	0.0331947	-1.02636	0.069542	-1.07001	0.132834		-1.02774	0.0924017	1.0164	0.110225	1.01881	0.101128
ILMN_1217416	XM_489045	4930412L05Rik			-1.0765	0.0451483	-1.07148	0.0541676	-1.0953	0.0523462		1.11875	0.092104	-1.04792	0.0365469	-1.03472	0.079139
ILMN_1217418	XM_001478657.1	LOC100047674		PREDICTED: Mus musculus similar to solute carrier family 35 (UDP-glucuronic acid/UDP-N-acetylgalactosamine dual transporter), member D1 (LOC100047674), mRNA.	-1.13125	0.0802764	-1.16658	0.136851	-1.17877	0.0963351		-1.00901	0.123493	-1.32033	0.0632557	-1.1774	0.0664003
ILMN_1217421	NM_134197.1	V1re8		Mus musculus vomeronasal 1 receptor, E8 (V1re8), mRNA.	-1.05085	0.0807879	-1.04465	0.0190831	-1.09619	0.142729		-1.08087	0.00973406	1.03154	0.100724	-1.00023	0.179792
ILMN_1217423	NM_001030306.1	BC037112	MGC106708	Mus musculus cDNA sequence BC037112 (BC037112), mRNA.	-1.17352	0.105514	-1.14599	0.0786696	-1.22006	0.0746269		-1.09532	0.088563	-1.23803	0.0204164	-1.20592	0.109816
ILMN_1217426	AK079494	A130062I03Rik			1.09156	0.120995	-1.03377	0.154489	-1.07095	0.122067		1.16858	0.167547	1.13445	0.149802	1.13022	0.20218
ILMN_1217428	XM_889916.3	EG625349		PREDICTED: Mus musculus predicted gene, EG625349 (EG625349), mRNA.	-1.08919	0.0826585	1.08324	0.100175	1.03956	0.0588926		-1.00538	0.140683	1.05488	0.18049	1.01721	0.115195
ILMN_1217430	NM_027191.1	Nup37	2410003L22Rik; 2810039M17Rik	Mus musculus nucleoporin 37 (Nup37), mRNA.	-1.03275	0.0311636	-1.16251	0.0862036	-1.08146	0.225796		1.08291	0.204543	-1.06098	0.111163	-1.07278	0.129442
ILMN_1217432	XM_145322.3	LOC213014			-1.054	0.118598	1.01619	0.0530832	-1.01867	0.0284498		-1.10362	0.0729005	-1.09117	0.122371	-1.00352	0.0323195
ILMN_1217441	XM_921354.2	C730024G19Rik		PREDICTED: Mus musculus RIKEN cDNA C730024G19 gene, transcript variant 5 (C730024G19Rik), mRNA.	-1.14383	0.0760955	-1.04626	0.132512	-1.22362	0.177888		1.01155	0.0401507	-1.09958	0.0788249	-1.0146	0.0314402
ILMN_1217442	XM_980150.1	LOC674611		PREDICTED: Mus musculus similar to Su48, transcript variant 3 (LOC674611), mRNA.	1.02723	0.0591828	1.01167	0.192338	-1.01492	0.0274887		-1.16262	0.113003	1.0609	0.0246104	-1.08478	0.084246
ILMN_1217444	NM_012024	Ppp2r5e			1.02936	0.0960027	-1.20835	0.104575	-1.42817	0.106053		1.0002	0.0834403	-1.30983	0.0996973	-1.09618	0.196798
ILMN_1217446	XM_149818.1	5830467E07Rik			1.07838	0.0273808	1.13279	0.17868	1.07112	0.0986088		-1.01811	0.0349434	1.3063	0.10607	1.16675	0.279846
ILMN_1217450	AK047673	Trpm7			1.00479	0.0943308	-1.14749	0.0961384	-1.1211	0.0536673		1.05447	0.0654709	1.06858	0.220935	-1.03888	0.0331944
ILMN_1217454	NM_010685.3	Lamp2	Lamp-2c; CD107b; Lamp-2b; Lamp-2a; Lamp-2	Mus musculus lysosomal-associated membrane protein 2 (Lamp2), transcript variant 2, mRNA.	1.02683	0.0129859	-1.13798	0.0167749	-1.54034	0.171183		1.10592	0.0969453	-1.05874	0.0734521	-1.07151	0.41666
ILMN_1217458	AK033358	8430403J19Rik			-1.81714	0.0277059	-1.79342	0.221271	-1.69595	0.0885447		-1.65569	0.0352871	-1.28082	0.0681031	-1.45289	0.0107136
ILMN_1217464	XM_141317.3	A430105I19Rik			-1.06966	0.0691894	-1.11938	0.153575	-1.14285	0.161339		1.04205	0.14619	1.00265	0.0755989	1.01835	0.0405147
ILMN_1217466		2610024H22Rik			-1.12453	0.117709	1.23584	0.0501062	-1.20115	0.153708		1.09162	0.130172	1.19491	0.122019	1.24296	0.477091
ILMN_1217470	NM_029238.2	Slc35f4	4930550L21Rik	Mus musculus solute carrier family 35, member F4 (Slc35f4), mRNA.	-1.03205	0.0729412	1.00196	0.0814727	1.01442	0.0979072		1.15186	0.151071	1.06668	0.0330482	1.02352	0.0473975
ILMN_1217473	NM_026368.1	5830433M19Rik	AI536248	Mus musculus RIKEN cDNA 5830433M19 gene (5830433M19Rik), mRNA.	-1.05363	0.067928	-1.03731	0.0959979	-1.02679	0.253942		1.01158	0.0959736	1.05913	0.0427191	1.17103	0.215348
ILMN_1217474	NM_001080771.1	Prdm13		Mus musculus PR domain containing 13 (Prdm13), mRNA. XM_977119	1.0064	0.0125606	1.10938	0.0299217	1.02578	0.159317		-1.00528	0.0925121	1.00345	0.165078	-1.0899	0.0706081
ILMN_1217479	AK085572	D630042J03Rik			-1.14646	0.041765	-1.11269	0.0833036	-1.20994	0.104576		1.11323	0.048161	-1.00294	0.0126932	1.04579	0.121112
ILMN_1217480	XM_001475418.1	LOC100046080		PREDICTED: Mus musculus similar to Spindlin 1, transcript variant 1 (LOC100046080), mRNA.	-1.04075	0.109283	1.15499	0.123848	-1.09204	0.270581		1.04124	0.0882717	1.25329	0.194494	1.43094	0.348023
ILMN_1217481	XM_001477622.1	LOC100047194		PREDICTED: Mus musculus similar to Eukaryotic translation initiation factor 4 gamma 3 (eIF-4-gamma 3) (eIF-4G 3) (eIF4G 3) (eIF-4-gamma II) (eIF4GII) (LOC100047194), mRNA.	1.04987	0.105665	1.00027	0.087307	-1.00504	0.00201741		-1.10062	0.0618983	1.00406	0.129234	1.15346	0.20803
ILMN_1217485	NM_173402.1	Rgs12	1200016K18Rik; AI481290; 4632412M04Rik; E130309H11	Mus musculus regulator of G-protein signaling 12 (Rgs12), mRNA.	-1.07058	0.105188	-1.26315	0.0600814	-1.02987	0.0338449		-1.01237	0.173335	-1.13855	0.087799	-1.0646	0.0429292
ILMN_1217489	XM_001473434.1	LOC671878		PREDICTED: Mus musculus similar to spermine synthase (LOC671878), mRNA.	1.14534	0.124083	1.22281	0.295027	-1.03072	0.0457892		1.00584	0.130042	1.42496	0.114689	1.05806	0.0882168
ILMN_1217493	NM_007910.2	Efna4	EFL-4; Epl4; LERK-4	Mus musculus ephrin A4 (Efna4), mRNA.	-1.12512	0.0751271	-1.03472	0.170393	1.05906	0.0889373		-1.19654	0.0803865	1.06327	0.141128	1.17307	0.147337
ILMN_1217500	XM_904152.2	LOC230628		PREDICTED: Mus musculus similar to C05G5.5 (LOC230628), mRNA.	-1.01002	0.00934365	-1.10113	0.015849	-1.1102	0.0249701		-1.00719	0.0694048	-1.11796	0.0264655	1.02265	0.140447
ILMN_1217502	NM_008075.1	Gabrr1	GABA-C	Mus musculus gamma-aminobutyric acid (GABA-C) receptor, subunit rho 1 (Gabrr1), mRNA.	-1.07015	0.0469371	-1.03394	0.091053	-1.02092	0.183369		1.19104	0.152725	-1.02268	0.0609519	1.20431	0.099477
ILMN_1217506	NM_013874.2	Dpf1		Mus musculus D4, zinc and double PHD fingers family 1 (Dpf1), mRNA.	1.02007	0.0271062	1.03744	0.0630098	1.04476	0.103278		-1.0939	0.156953	-1.00865	0.0846308	1.03309	0.0686715
ILMN_1217507	NM_001013774.2	AW146299	Gm1055	Mus musculus expressed sequence AW146299 (AW146299), mRNA.	1.00048	0.0761628	1.04158	0.0788619	-1.09	0.0302132		-1.04788	0.0499771	1.03391	0.0471561	1.05996	0.13045
ILMN_1217511	XM_914939.1	LOC638794		PREDICTED: Mus musculus similar to cytochrome P450, family 26, subfamily C, polypeptide 1 (LOC638794), mRNA.	-1.0042	0.0333321	-1.0165	0.0700506	-1.03707	0.0460434		-1.01818	0.0511801	-1.04951	0.0521173	-1.04067	0.17504
ILMN_1217517	NM_019978.2	Dclk1	Dcamkl1; Cpg16; DCLK; CLICK-I; 2810480F11Rik; Dcl; 1700113D08Rik; mKIAA0369	Mus musculus doublecortin-like kinase 1 (Dclk1), mRNA.	-1.15411	0.138682	-1.13938	0.0537712	-1.17167	0.106657		-1.32748	0.0499437	-1.11895	0.080703	-1.40464	0.149665
ILMN_1217519	NM_028021.2	Myh14	NHMCII; 2400004E04Rik; NMHC II-C; II-C	Mus musculus myosin, heavy polypeptide 14 (Myh14), mRNA.	-1.01922	0.218643	-1.16029	0.0574128	1.02609	0.200152		-1.17037	0.104293	-1.2402	0.101593	-1.18421	0.085691
ILMN_1217520	XM_908793.3	Dnhd1		PREDICTED: Mus musculus dynein heavy chain domain 1 (Dnhd1), mRNA.	1.00206	0.106523	-1.07287	0.178627	-1.17874	0.144945		1.04475	0.10411	1.08158	0.0516284	1.09157	0.148576
ILMN_1217527	AK089750	Ly108			1.00569	0.0572304	-1.05268	0.174221	-1.05804	0.0549718		1.08975	0.15671	1.19687	0.261489	-1.05304	0.0501385
ILMN_1217530	AK028495	4632404B13Rik			1.10071	0.0514388	-1.17387	0.0851659	-1.01116	0.068452		-1.01241	0.122648	-1.10604	0.12361	-1.15268	0.0920377
ILMN_1217532	XM_001477536.1	LOC100042083		PREDICTED: Mus musculus similar to 2810047C21Rik protein (LOC100042083), mRNA.	-1.08229	0.132272	-1.04475	0.0405819	-1.04038	0.0504233		-1.03044	0.0721461	1.02636	0.104144	-1.02623	0.0731354
ILMN_1217537	XM_988958.1	LOC671761		PREDICTED: Mus musculus hypothetical protein LOC671761 (LOC671761), mRNA.	-1.10018	0.101629	1.03133	0.0835218	-1.0021	0.0276598		1.04372	0.0443454	1.07012	0.0480681	1.07629	0.030251
ILMN_1217543	XM_001478492.1	LOC100042508		PREDICTED: Mus musculus similar to zinc finger protein 54 (LOC100042508), mRNA.	1.0609	0.184054	-1.05218	0.0919782	-1.16653	0.0695306		-1.0067	0.075011	-1.18573	0.127117	-1.09783	0.152137
ILMN_1217544	XM_001481313.1	4930403J07Rik		PREDICTED: Mus musculus RIKEN cDNA 4930403J07 gene (4930403J07Rik), mRNA.	1.11024	0.157478	-1.0042	0.0483068	1.03632	0.0645463		-1.13439	0.0924622	-1.02019	0.041668	-1.06072	0.0874157
ILMN_1217545	XM_156321.1	LOC209033			-1.02231	0.101268	1.23547	0.158521	1.13196	0.130759		1.0592	0.183496	1.32323	0.0608961	1.14601	0.112131
ILMN_1217550	XM_356835.1	LOC383066			-1.1735	0.132719	-1.11859	0.0538828	-1.01363	0.122821		1.04937	0.11882	-1.11688	0.0637342	1.00256	0.167376
ILMN_1217552	NM_009572.3	Zhx1	mKIAA4149; KIAA4149	Mus musculus zinc fingers and homeoboxes 1 (Zhx1), transcript variant 1, mRNA.	-1.06564	0.0559121	-1.3364	0.115821	-1.33412	0.11554		1.109	0.23295	-1.14656	0.0748381	-1.05252	0.121031
ILMN_1217553	NM_146104.2	Aph1a	MGC36389; MGC7221; 6530402N02Rik	Mus musculus anterior pharynx defective 1a homolog (C. elegans) (Aph1a), mRNA.	-1.00087	0.124609	1.03891	0.197454	-1.11035	0.153379		-1.07008	0.0904567	-1.18694	0.0810308	-1.07172	0.125871
ILMN_1217555	NM_029696.3	Mdh1b	1700124B08Rik; AV255588	Mus musculus malate dehydrogenase 1B, NAD (soluble) (Mdh1b), mRNA.	1.05091	0.0864243	1.07668	0.118116	-1.07882	0.257639		-1.052	0.0885604	1.1774	0.0964639	1.19543	0.0808588
ILMN_1217556	NM_001024604.2	Ankrd28	AI465466; mKIAA0379; KIAA0379; AI604979; E430019N21Rik	Mus musculus ankyrin repeat domain 28 (Ankrd28), mRNA.	1.14031	0.0761699	-1.09814	0.029243	-1.10807	0.0986195		1.02781	0.107339	-1.21028	0.0751769	-1.05981	0.24026
ILMN_1217557	AK016916	KIF24			1.06661	0.137073	-1.02578	0.0827564	-1.11511	0.12867		1.05628	0.046572	-1.15269	0.0975653	1.00664	0.0786175
ILMN_1217560	AK047245	Inpp5e			1.03476	0.059281	1.04343	0.123062	1.06657	0.136691		1.05345	0.0679686	-1.03683	0.0962564	1.04504	0.184268
ILMN_1217562	XM_354972.1	2610510B01Rik			-1.19325	0.139989	-1.19463	0.188503	-1.08095	0.288928		1.00526	0.0905414	1.14943	0.224539	1.07209	0.100518
ILMN_1217567	NM_026068.2	Med31	RP23-207N15.5; CGI-125; 3110004H13Rik	Mus musculus mediator of RNA polymerase II transcription, subunit 31 homolog (yeast) (Med31), mRNA.	-1.08051	0.123948	1.00344	0.16801	1.04507	0.130465		1.02358	0.111802	1.03219	0.074838	1.03832	0.116461
ILMN_1217571	AK036217	9630046G05Rik			-1.07701	0.0752956	-1.16299	0.0559003	-1.11803	0.121015		1.04416	0.0777089	-1.01951	0.0688486	-1.07304	0.0904365
ILMN_1217575	XM_001476259.1	AI115600		PREDICTED: Mus musculus expressed sequence AI115600 (AI115600), mRNA.	-1.10634	0.0585762	-1.07223	0.038588	-1.1398	0.0391659		-1.02036	0.024924	-1.05897	0.0574968	-1.11683	0.127257
ILMN_1217576	NM_007963.1	Evi1	Evi-1; D630039M04Rik; Jbo	Mus musculus ecotropic viral integration site 1 (Evi1), mRNA.	-1.04139	0.0329145	1.09033	0.182086	1.08975	0.112364		1.07668	0.111551	1.09994	0.0558208	1.10715	0.0347358
ILMN_1217577	NM_172592.2	Sfrs12	AI450757; SRrp508; SRrp86; 8430401B01; AI462342	Mus musculus splicing factor, arginine/serine-rich 12 (Sfrs12), mRNA.	1.12499	0.0905198	1.18714	0.179072	1.19407	0.373422		-1.02441	0.0678856	-1.0277	0.0939397	-1.02641	0.178893
ILMN_1217583	NM_001024726.2	Zfp607	4732475C15Rik	Mus musculus zinc finger proten 607 (Zfp607), mRNA.	1.10713	0.229843	1.25618	0.241424	-1.00709	0.105432		1.06577	0.101035	-1.02685	0.143473	1.10019	0.115271
ILMN_1217584	NM_011655.4	Tubb5	AI596182; M(beta)5; AA408537; B130022C14Rik	Mus musculus tubulin, beta 5 (Tubb5), mRNA.	1.06212	0.112044	1.06161	0.107692	1.05121	0.0573191		-1.04816	0.141553	-1.27548	0.2552	1.07032	0.127555
ILMN_1217587	XM_357937.1	LOC384914			1.12083	0.0404801	-1.0677	0.0388757	-1.08578	0.118216		1.04028	0.141981	-1.11886	0.0139416	-1.04911	0.0996052
ILMN_1217589	AK079896	Hps3			-1.10315	0.194451	-1.08741	0.0677087	-1.03558	0.0693704		1.0433	0.0587376	1.00348	0.0544602	-1.00225	0.0995318
ILMN_1217590	NM_009266.3	Sephs2	Ysg3; Sps2	Mus musculus selenophosphate synthetase 2 (Sephs2), mRNA.	-1.23151	0.0577745	-2.40941	0.120806	-1.93055	0.076845		-1.33851	0.256903	-2.69335	0.0514599	-2.19715	0.053205
ILMN_1217594	NM_146503.1	Olfr952	MOR171-21	Mus musculus olfactory receptor 952 (Olfr952), mRNA.	-1.10585	0.018127	-1.03299	0.152386	-1.09262	0.119723		-1.0827	0.0803594	-1.24517	0.0672621	-1.03347	0.0498789
ILMN_1217599	NM_016858.2	Rab33b		Mus musculus RAB33B, member of RAS oncogene family (Rab33b), mRNA.	1.2462	0.111951	1.29161	0.145153	1.24622	0.153615		1.12414	0.128596	1.26206	0.0373896	1.33981	0.269737
ILMN_1217600	AK032524	Camk2d			1.0412	0.0961235	-1.1469	0.11108	-1.05913	0.0735268		-1.04643	0.144101	-1.01019	0.14909	-1.00185	0.130136
ILMN_1217602	XM_357615.1	LOC384387			-1.06698	0.0676152	-1.10457	0.0577282	-1.09853	0.0650502		1.00377	0.0996122	-1.10917	0.0475049	-1.06352	0.105101
ILMN_1217606	XM_983541.2	1500005K14Rik		PREDICTED: Mus musculus RIKEN cDNA 1500005K14 gene (1500005K14Rik), mRNA.	1.05261	0.0663254	1.32995	0.168325	1.48259	0.257561		-1.03812	0.223591	1.20305	0.0951587	1.0517	0.456135
ILMN_1217611	XM_355885.1	LOC381873			-1.09802	0.283824	-1.41279	0.0512286	-1.29348	0.0909524		-1.05396	0.297278	-1.39053	0.131745	-1.63047	0.152474
ILMN_1217612	XM_147374.1	Apg5l			1.02927	0.0211178	-1.46751	0.128062	-1.9794	0.0361148		-1.02981	0.228267	-1.70713	0.031218	-1.76182	0.177707
ILMN_1217614	AK048153	Ophn1			1.08325	0.163096	1.11554	0.0624221	1.03973	0.0482636		1.04707	0.0938032	-1.0128	0.111042	1.01101	0.0848823
ILMN_1217617	NM_019825.2	Ncoa6	AIB3; mKIAA0181; ASC2; ASC-2; RAP250; Ncoa7; PRIP; NRC; MGC90663	Mus musculus nuclear receptor coactivator 6 (Ncoa6), mRNA.	1.00806	0.226022	-1.05782	0.0130543	1.13985	0.412794		-1.14956	0.239537	-1.21492	0.249331	1.05093	0.0252318
ILMN_1217619	XM_359106.1	LOC386181			1.03115	0.0507492	-1.06807	0.00893815	-1.04046	0.049292		1.06586	0.123887	-1.08035	0.0318871	1.00946	0.0316817
ILMN_1217620	XM_001474305.1	LOC100040159		PREDICTED: Mus musculus hypothetical protein LOC100040159 (LOC100040159), mRNA.	1.04282	0.158451	1.05997	0.0873807	-1.02069	0.110648		1.00368	0.0585595	-1.01553	0.0182057	1.00366	0.0899675
ILMN_1217622	NM_009019.2	Rag1	Rag-1	Mus musculus recombination activating gene 1 (Rag1), mRNA.	-1.23838	0.0535106	-1.1814	0.101596	-1.05346	0.0912448		-1.0011	0.0713303	-1.05689	0.0322173	1.05272	0.0655165
ILMN_1217625	NM_009859.3	Sept7	E430034N22; Cdc10; mKIAA4020; KIAA4020	Mus musculus septin 7 (Sept7), mRNA.	1.04843	0.220735	1.21358	0.126657	1.1502	0.517175		-1.02179	0.343079	-1.05285	0.430489	-1.04825	0.127106
ILMN_1217629	NM_008399.1	Itgae	A530055J10; CD103; alpha-E1	Mus musculus integrin, alpha E, epithelial-associated (Itgae), transcript variant 1, mRNA.	1.67037	0.0732045	1.64932	0.305768	1.38901	0.192453		1.27302	0.0952814	1.54811	0.194235	1.41244	0.37475
ILMN_1217631	NM_173364.4	Zfp445	ZNF168; mszf50; mszf29; AW610627	Mus musculus zinc finger protein 445 (Zfp445), mRNA.	-1.15173	0.0814139	1.0069	0.138559	-1.09603	0.0252803		-1.00514	0.0831631	-1.12248	0.143188	-1.02598	0.111552
ILMN_1217634	NM_146286.1	Olfr981	MOR223-8	Mus musculus olfactory receptor 981 (Olfr981), mRNA.	1.17592	0.117853	1.08205	0.154275	-1.02608	0.0860284		-1.03732	0.0556196	1.03476	0.116315	-1.04989	0.084451
ILMN_1217638	AK038695	A230055O04Rik			-1.07904	0.081846	1.03027	0.0952182	1.01643	0.0819528		1.07786	0.00800208	-1.10032	0.0928134	-1.02159	0.0756514
ILMN_1217639	XM_283726.2	LOC329394			-1.01808	0.0851104	-1.16841	0.172159	-1.04871	0.0796409		1.15492	0.1808	1.07367	0.124667	1.02345	0.0782829
ILMN_1217640	NM_001081122.1	Cep63	D9Mgc48e; ET2; AL450317.13gm1; D9Mgc41; CD20R; 4921501M07	Mus musculus centrosomal protein 63 (Cep63), mRNA.	1.08774	0.0423417	1.08771	0.0134965	1.12298	0.187087		1.05887	0.0108683	1.03319	0.0490819	-1.0787	0.0672738
ILMN_1217642	AK040499	A430103M24Rik			1.17813	0.107309	1.46248	0.15	1.25533	0.279712		1.22532	0.209597	1.29791	0.226607	1.17727	0.269621
ILMN_1217646	NM_026913.2	Mitd1	1500032H18Rik	Mus musculus MIT, microtubule interacting and transport, domain containing 1 (Mitd1), mRNA. XM_978698	1.4768	0.185468	1.38663	0.290874	1.12251	0.148888		1.06357	0.177147	1.24189	0.265793	1.1277	0.111654
ILMN_1217647		4930458D05Rik			-1.08305	0.105837	-1.06942	0.141363	1.01816	0.083368		-1.11966	0.055886	1.04734	0.114278	-1.08338	0.102244
ILMN_1217657	NM_145713.2	Hist1h1d	H1D; H1f3; H1.3; H1s-4	Mus musculus histone cluster 1, H1d (Hist1h1d), mRNA.	-1.12134	0.0970152	-1.1483	0.0274742	-1.10489	0.0354837		-1.03224	0.0667425	-1.156	0.0552261	-1.04898	0.0134762
ILMN_1217662	NM_009733.1	Axin1	Axin; Kb; MGC132911; kinky; knobbly; Ki; Fu; fused; AI316800	Mus musculus axin 1 (Axin1), mRNA.	1.16177	0.0794163	1.20407	0.0958	1.27464	0.0802266		1.02039	0.121282	-1.00263	0.159203	1.03641	0.422916
ILMN_1217668	AK044163	A830096K14Rik			-1.0629	0.138929	-1.07086	0.149859	-1.08062	0.15675		-1.04429	0.0959157	-1.12409	0.0714496	-1.02806	0.0921233
ILMN_1217670	NM_172727.2	D330028D13Rik		Mus musculus RIKEN cDNA D330028D13 gene (D330028D13Rik), mRNA.	1.1199	0.160454	1.43122	0.299238	1.38892	0.183485		1.1255	0.132778	1.08429	0.167724	1.12009	0.366415
ILMN_1217673	XR_001926.2	LOC666840		PREDICTED: Mus musculus similar to Ldha protein (LOC666840), misc RNA.	-1.09459	0.094958	1.06633	0.133656	-1.02256	0.122731		-1.0006	0.0831237	-1.0923	0.0295799	-1.02271	0.170955
ILMN_1217679	XM_355442.1	Gm1019			1.00714	0.0708992	-1.00731	0.0325163	-1.07089	0.174529		1.10671	0.154928	1.06715	0.139676	-1.11056	0.0544207
ILMN_1217681	XM_913899.3	LOC638031		PREDICTED: Mus musculus similar to peptidylprolyl isomerase A (LOC638031), mRNA.	-1.03081	0.0739088	-1.09387	0.173778	-1.05048	0.132833		-1.15737	0.0339221	-1.03424	0.0906973	1.01145	0.150915
ILMN_1217683	NM_011395.2	Slc22a3	EMT; Orct3; Oct3; Slca22a3	Mus musculus solute carrier family 22 (organic cation transporter), member 3 (Slc22a3), mRNA.	-1.00465	0.0650559	-1.01624	0.0896858	-1.20514	0.108081		1.06535	0.0287846	-1.21008	0.161667	1.0839	0.168046
ILMN_1217693	AK012302	2700029L05Rik			-1.04714	0.0681682	-1.06033	0.178902	1.00226	0.10241		1.00355	0.118985	-1.0754	0.129186	-1.03531	0.182932
ILMN_1217695	XM_359215.1	LOC386412			1.25095	0.112911	1.03641	0.00923211	1.01502	0.0623619		1.01686	0.0448351	-1.03703	0.0963678	-1.032	0.0856181
ILMN_1217700	NM_134136.2	Fbxo38	AU044865; 6030410I24Rik; Moka; SP329; AW214031	Mus musculus F-box protein 38 (Fbxo38), mRNA.	1.13513	0.0934307	1.02979	0.0571533	1.08339	0.0771789		1.03025	0.0662639	1.05869	0.0658042	-1.01535	0.0911372
ILMN_1217702	NM_026148.2	Lims1	AI507642; PINCH; C430041B13Rik; AW551584; AU021743; PINCH1; 2310016J22Rik; 4921524A02Rik; Lims1l	Mus musculus LIM and senescent cell antigen-like domains 1 (Lims1), mRNA.	1.03238	0.120497	1.13745	0.139542	-1.10263	0.111197		1.08917	0.174226	-1.07141	0.141538	-1.01246	0.0772418
ILMN_1217703	NM_007729.2	Col11a1	C530001D20Rik; cho	Mus musculus collagen, type XI, alpha 1 (Col11a1), mRNA.	-1.04853	0.0472953	-1.13143	0.0429023	-1.14116	0.138762		-1.12409	0.0422407	-1.1741	0.0459728	-1.01206	0.149607
ILMN_1217704	NM_027921.1	Slc16a14	1110004H10Rik	Mus musculus solute carrier family 16 (monocarboxylic acid transporters), member 14 (Slc16a14), mRNA.	-1.12136	0.110024	-1.06033	0.027097	-1.12923	0.0244026		-1.07134	0.0616793	-1.0919	0.141497	-1.11849	0.0773827
ILMN_1217705	XM_358371.1	C130002K18Rik			-1.09042	0.0909755	1.13744	0.154238	1.20544	0.250836		1.00898	0.110163	1.2493	0.0711553	1.08121	0.167009
ILMN_1217706	NM_008763.1	Olfr16	MOR267-13; MOR23	Mus musculus olfactory receptor 16 (Olfr16), mRNA.	-1.1157	0.0817484	-1.01327	0.0569627	1.01132	0.0677465		-1.04331	0.132338	-1.04001	0.0298827	-1.09045	0.207338
ILMN_1217709	XM_357733.1	LOC384593		PREDICTED: Mus musculus similar to 60S ribosomal protein L23a (LOC384593), mRNA.	-1.08164	0.138919	1.11186	0.241484	1.24095	0.337067		-1.14373	0.335535	1.06544	0.293665	1.19545	0.20731
ILMN_1217710	NM_175173.3	Wdr27	0610012K18Rik	Mus musculus WD repeat domain 27 (Wdr27), mRNA.	-1.1242	0.0133021	1.06877	0.152274	-1.16574	0.163007		-1.00222	0.00781856	-1.07302	0.0826825	-1.02322	0.0926875
ILMN_1217713	NM_177033	A930041G11Rik			-1.09783	0.0679714	-1.13227	0.0798755	-1.03286	0.0637913		-1.05572	0.0967388	-1.0888	0.119171	-1.05211	0.0928871
ILMN_1217715	XM_356632.1	LOC382703			1.1292	0.198247	1.14073	0.0274114	1.03183	0.119209		-1.00805	0.0398233	1.09961	0.0375961	1.04128	0.0949965
ILMN_1217716	NM_008715	Ddx26			1.10132	0.148006	1.19804	0.169528	1.13142	0.108146		1.20857	0.109258	1.42988	0.187609	1.33612	0.360651
ILMN_1217719	XM_358614.1	LOC381547			-1.13624	0.0503849	-1.21755	0.00993269	-1.14763	0.1662		1.03465	0.143816	-1.01256	0.162226	1.06613	0.0974285
ILMN_1217723	NM_025303.2	Stau2		Mus musculus staufen (RNA binding protein) homolog 2 (Drosophila) (Stau2), transcript variant 3, mRNA.	1.02756	0.113331	1.10906	0.291184	-1.05835	0.0973553		1.24197	0.0711298	1.55374	0.255713	1.22878	0.284438
ILMN_1217725	NM_172827.3	Lnpep	gp160; PLAP; IRAP; 2010309L07Rik; vp165; 4732490P18Rik; CAP	Mus musculus leucyl/cystinyl aminopeptidase (Lnpep), mRNA.	1.10209	0.275129	1.06799	0.0340973	-1.16784	0.108314		1.12122	0.121978	1.11648	0.144794	1.1146	0.199602
ILMN_1217727	AK028232	2810441E16Rik			-1.16741	0.0448036	-1.21334	0.100628	-1.24695	0.0601854		-1.07009	0.090804	-1.3701	0.0270457	-1.29469	0.0377818
ILMN_1217728	NM_020604.1	Jph1	ENSMUSG00000054314; JP-1; Jp1	Mus musculus junctophilin 1 (Jph1), mRNA.	-1.18539	0.00859816	-1.22197	0.183974	-1.32321	0.123924		1.24263	0.118071	1.04143	0.0580397	-1.06462	0.126767
ILMN_1217733	AK053370	E130012F07Rik			-1.07508	0.0906382	-1.04606	0.0925947	-1.00946	0.156967		-1.0138	0.0960078	1.05012	0.0731221	1.10149	0.116881
ILMN_1217734	NM_001033254.2	Pak6	4732456M09	Mus musculus p21 (CDKN1A)-activated kinase 6 (Pak6), mRNA. XM_924943 XM_924947 XM_924951 XM_924953	-1.04242	0.103165	1.1604	0.0762347	1.16242	0.126302		-1.00829	0.166833	1.04682	0.141806	1.07464	0.0197697
ILMN_1217735	XM_982329.2	9530059O14Rik		PREDICTED: Mus musculus RIKEN cDNA 9530059O14 gene (9530059O14Rik), mRNA.	-1.06768	0.115266	-1.10961	0.0668881	-1.08901	0.0607954		-1.00042	0.0822554	-1.06309	0.140838	-1.03838	0.0626259
ILMN_1217738	NM_146549.1	Olfr786	MOR111-5	Mus musculus olfactory receptor 786 (Olfr786), mRNA.	1.11211	0.0824362	1.12596	0.0462115	-1.07365	0.171615		1.19927	0.0460726	-1.03941	0.150317	1.10755	0.0408833
ILMN_1217742	NM_213616.1	Atp2b4	PMCA4; MGC129362; MGC129363	Mus musculus ATPase, Ca++ transporting, plasma membrane 4 (Atp2b4), mRNA.	1.04987	0.071776	-1.07078	0.0893171	-1.15915	0.0412261		-1.02175	0.100954	-1.16423	0.0584847	-1.05964	0.0753053
ILMN_1217752	AK076576	4921519B16Rik			1.06072	0.0981466	1.22242	0.2121	1.31786	0.282347		-1.08238	0.191455	1.09107	0.143596	1.1027	0.0123343
ILMN_1217753	NM_016795.3	Srpk1	AU017960	Mus musculus serine/arginine-rich protein specific kinase 1 (Srpk1), mRNA.	1.26403	0.125514	1.51868	0.105014	1.37914	0.116947		1.06957	0.31816	1.44775	0.109721	1.36921	0.0875701
ILMN_1217757	XM_356572	D530031C13Rik			-1.0994	0.074668	-1.04985	0.0596447	-1.07813	0.224094		1.09598	0.0422775	-1.01311	0.0263822	1.07641	0.030737
ILMN_1217759	NM_026171	Nvl			1.03137	0.0352082	1.08972	0.089745	-1.04741	0.0520223		1.02052	0.0941442	-1.04297	0.107868	-1.06696	0.131903
ILMN_1217760	XM_357635.1	LOC384417			-1.02524	0.105371	1.13776	0.237367	1.14809	1.50493		-1.00176	0.0363995	2.27931	5.22437	6.11324	4.62431
ILMN_1217761	NM_139147.2	Rab40b	SEC4L; rar	Mus musculus Rab40b, member RAS oncogene family (Rab40b), mRNA.	-1.00078	0.119416	1.07027	0.110415	1.00415	0.0848316		1.08	0.139139	1.01338	0.102455	1.02222	0.0449396
ILMN_1217766	XM_358605.1	LOC381520			1.07633	0.0092467	-1.15854	0.151707	-1.03317	0.0959019		-1.06065	0.103035	1.02559	0.0840564	-1.10293	0.100425
ILMN_1217767	NM_028419.2	Glrx5	2900070E19Rik; 2310004O13Rik; AU020725	Mus musculus glutaredoxin 5 homolog (S. cerevisiae) (Glrx5), mRNA.	-1.05848	0.0843885	-1.16322	0.101115	-1.3658	0.0523443		1.0303	0.0925531	-1.27654	0.0444681	-1.19195	0.0820409
ILMN_1217773	NM_019916.1	Tlx3	Tlx1l2; Rnx; Hox11l2	Mus musculus T-cell leukemia, homeobox 3 (Tlx3), mRNA.	-1.00655	0.131052	1.03578	0.194344	-1.00743	0.077663		-1.17487	0.12595	-1.2224	0.128267	-1.14114	0.110208
ILMN_1217776	XM_485570	Mll5			-1.01095	0.234051	1.02289	0.271473	1.07379	0.308227		-1.1698	0.483848	1.1095	0.324565	1.1374	0.340958
ILMN_1217779	XM_485100	BC043944			1.04829	0.0952939	1.05191	0.173807	1.02871	0.0376075		-1.29925	0.188297	-1.32146	0.231356	-1.09508	0.13623
ILMN_1217781		8430421H08Rik			-1.23692	0.0423463	-1.14248	0.0325698	-1.28988	0.230604		1.04672	0.12414	-1.03755	0.144562	1.00264	0.0591217
ILMN_1217786	NM_029495.1	Epsti1	2310046K10Rik; BRESI1; 5033415K03Rik	Mus musculus epithelial stromal interaction 1 (breast) (Epsti1), transcript variant a, mRNA.	1.21719	0.169951	1.09161	0.679414	1.00786	0.438332		1.33751	0.305427	1.52116	0.250707	1.33113	0.128825
ILMN_1217790	NM_009229.4	Sntb2	Snt2	Mus musculus syntrophin, basic 2 (Sntb2), mRNA.	-1.08892	0.154301	1.34126	0.149856	1.47091	0.336151		-1.12452	0.185175	1.37934	0.14064	1.4432	0.0479989
ILMN_1217794	NM_013896.3	Timm9	Timm10; 2810011L15Rik; Tim10a	Mus musculus translocase of inner mitochondrial membrane 9 homolog (yeast) (Timm9), nuclear gene encoding mitochondrial protein, transcript variant 1, mRNA.	-1.02683	0.0190254	-1.10308	0.0636559	-1.38091	0.0735734		-1.07069	0.0419571	-1.21407	0.0913768	-1.19463	0.112994
ILMN_1217798	AK082335	Adam22			-1.05061	0.0929622	-1.04955	0.0935714	-1.14379	0.10999		-1.00822	0.0305553	-1.14533	0.0565204	-1.14555	0.0548073
ILMN_1217802	AK041032	A530064K17Rik			-1.05453	0.0692293	-1.09562	0.0699036	-1.12889	0.0830325		-1.06229	0.140455	-1.05865	0.0969201	-1.03459	0.197004
ILMN_1217804	NM_013643.1	Ptpn5	Step	Mus musculus protein tyrosine phosphatase, non-receptor type 5 (Ptpn5), mRNA.	-1.0453	0.0680029	-1.21347	0.0811914	1.04531	0.0243137		-1.02711	0.139045	-1.15028	0.0600953	-1.04982	0.0763205
ILMN_1217805	AK052744	D630041L13Rik			1.02472	0.145347	-1.01484	0.0474915	1.08238	0.195983		-1.09602	0.0596644	-1.05116	0.0410996	-1.00536	0.0633432
ILMN_1217809	XM_356568.1	LOC382557			1.18281	0.10805	1.58198	0.137036	1.41406	0.120591		1.20596	0.0964704	1.45059	0.110152	1.22887	0.267977
ILMN_1217812	NM_001033039.2	Klhdc9	ESTM31; 1190002J23Rik; AA087357	Mus musculus kelch domain containing 9 (Klhdc9), mRNA.	-1.01948	0.0597721	-1.09158	0.127414	-1.14043	0.107948		1.0409	0.0653117	-1.25749	0.135396	-1.10268	0.0558828
ILMN_1217813	NM_007410.2	Adh5	Adh-5; GSNOR; Adh3	Mus musculus alcohol dehydrogenase 5 (class III), chi polypeptide (Adh5), mRNA.	-1.09849	0.243494	-1.20312	0.0759365	-1.02486	0.3689		-1.22346	0.168342	-1.31203	0.110737	-1.17609	0.137547
ILMN_1217814	AK081771	C130075H21Rik			-1.08201	0.0649898	-1.11082	0.064122	-1.04361	0.0482098		-1.02033	0.106397	-1.05339	0.08603	1.00103	0.106958
ILMN_1217815	NM_023116.3	Cacnb2	MGC129334; AW060387; Cchb2; MGC129335	Mus musculus calcium channel, voltage-dependent, beta 2 subunit (Cacnb2), mRNA.	-1.0347	0.0950379	1.05413	0.134377	-1.00023	0.0942902		-1.05752	0.0358969	-1.11956	0.0565728	1.0316	0.135578
ILMN_1217817		D4Ertd681e			-1.43386	0.108846	-1.83761	0.0967849	-1.41356	0.257697		-1.0425	0.254608	-1.21859	0.257227	-1.09884	0.422376
ILMN_1217820	XM_001476396.1	LOC100040854		PREDICTED: Mus musculus similar to Predicted gene, OTTMUSG00000010207 (LOC100040854), mRNA.	-1.08732	0.064214	-1.13884	0.142291	-1.20692	0.184998		1.03264	0.0850943	1.02321	0.0892041	1.05001	0.0945333
ILMN_1217822	NM_133722.1	2210412D01Rik	AL023007	Mus musculus RIKEN cDNA 2210412D01 gene (2210412D01Rik), mRNA.	-1.14995	0.376544	-1.546	0.162962	-1.17181	0.613754		-1.14591	0.23119	-1.42134	0.299307	-1.12067	0.199967
ILMN_1217826	XR_005062.2	LOC677448		PREDICTED: Mus musculus similar to actin (LOC677448), misc RNA.	1.40375	0.301184	2.39935	1.13826	2.35012	0.815436		-1.12914	1.20798	2.25751	0.843408	1.56159	1.35944
ILMN_1217827	NM_026511.1	2810002N01Rik	Apop-1; 1700081D05Rik	Mus musculus RIKEN cDNA 2810002N01 gene (2810002N01Rik), mRNA.	-1.17204	0.113056	-1.2339	0.0481232	-1.17947	0.0236996		1.00047	0.165582	-1.12191	0.171519	-1.08135	0.181078
ILMN_1217832	NM_008135	Slc6a9			1.03148	0.0363385	-1.08378	0.0774914	-1.07709	0.07366		1.07242	0.0856379	-1.01693	0.0393221	1.14916	0.186238
ILMN_1217836	AK090343	G630056H24Rik			-1.06369	0.142126	1.23676	0.199918	1.20112	0.0299114		-1.15366	0.211886	1.11261	0.19091	1.23122	0.151489
ILMN_1217838	NM_178115.3	2700050L05Rik	MGC27934; MGC58090; AU022667; AW558805	Mus musculus RIKEN cDNA 2700050L05 gene (2700050L05Rik), transcript variant 2, mRNA.	1.00118	0.107415	-1.01859	0.0523667	-1.18639	0.0875093		-1.04476	0.0725461	-1.08851	0.0491327	-1.1054	0.0363094
ILMN_1217839	NM_138742.1	Nap1l3	MB20	Mus musculus nucleosome assembly protein 1-like 3 (Nap1l3), mRNA.	1.05194	0.0807719	1.01617	0.112985	1.05728	0.142462		1.17169	0.167801	1.02822	0.111935	1.01425	0.0309232
ILMN_1217842	NM_011792.4	Bace1	C76936	Mus musculus beta-site APP cleaving enzyme 1 (Bace1), mRNA.	-1.08636	0.0795194	-1.0878	0.0486879	-1.01946	0.13197		-1.1809	0.128397	-1.30931	0.160113	-1.2186	0.00992615
ILMN_1217846	XM_356822.1	LOC383047			1.05762	0.154913	-1.06078	0.0912865	1.05506	0.101296		-1.05582	0.0185034	1.01252	0.0447431	1.11929	0.239681
ILMN_1217847	NM_030699.1	Ntng1	Lmnt1; AI853992; A930010C08Rik; MGC99878	Mus musculus netrin G1 (Ntng1), mRNA.	1.03833	0.137597	1.06202	0.160274	-1.06442	0.0932485		-1.08095	0.0846696	-1.08267	0.0684886	1.03353	0.0582939
ILMN_1217849	NM_010686.3	Laptm5	E3	Mus musculus lysosomal-associated protein transmembrane 5 (Laptm5), mRNA.	2.67794	0.699183	5.4061	0.481766	4.73535	1.12141		3.04936	1.53179	6.33705	0.415872	4.65131	3.10706
ILMN_1217850	AK038067	A130075K23Rik			-1.03368	0.187325	-1.31472	0.285672	-1.19758	0.108667		-1.17417	0.091504	-1.03018	0.150382	1.12997	0.514137
ILMN_1217853	XM_908623.2	LOC634026		PREDICTED: Mus musculus hypothetical LOC634026 (LOC634026), mRNA.	1.04481	0.12903	1.0944	0.11689	-1.0197	0.178384		1.03904	0.125191	-1.07602	0.0344303	1.00608	0.117125
ILMN_1217855	NM_024253.4	Nkg7	2500004F03Rik	Mus musculus natural killer cell group 7 sequence (Nkg7), mRNA.	1.35086	0.0420887	3.41611	0.524671	3.29908	0.60607		1.34853	1.71472	2.90248	1.1071	2.29802	2.29359
ILMN_1217856	XM_358625.1	LOC381587			-1.05814	0.0651095	-1.07871	0.0693258	-1.05908	0.0953326		-1.09788	0.098666	-1.04578	0.103207	-1.03115	0.0814505
ILMN_1217858	XM_981156.1	Synpo		PREDICTED: Mus musculus synaptopodin, transcript variant 2 (Synpo), mRNA.	-1.09443	0.156887	1.0267	0.0301689	-1.02362	0.101554		-1.01438	0.118952	1.06336	0.106786	1.11033	0.0961788
ILMN_1217859	AK080809	Ndufa6			-1.19455	0.0496158	-1.18635	0.038567	-1.16359	0.0200226		-1.06129	0.134797	-1.14907	0.142882	-1.22382	0.0721881
ILMN_1217864	NM_182996.3	Zfp692	AI839920; AI746306	Mus musculus zinc finger protein 692 (Zfp692), transcript variant 1, mRNA.	1.08439	0.258484	1.29856	0.276536	1.17107	0.258807		-1.10883	0.221074	-1.09914	0.267668	-1.07935	0.166623
ILMN_1217869	AK082063	Trrp3			-1.02173	0.0960298	-1.07779	0.0107302	-1.11086	0.12516		-1.093	0.103421	-1.13716	0.0917005	-1.12718	0.0342798
ILMN_1217875	NM_177282.4	Mical2	KIAA0750; mKIAA0750; 9530064J02; 5330438E18Rik	Mus musculus microtubule associated monoxygenase, calponin and LIM domain containing 2 (Mical2), mRNA.	1.4213	0.27508	1.63099	0.152704	1.48768	0.0370019		-1.07228	0.533259	1.48038	0.264428	1.20295	0.485568
ILMN_1217876		9627947_61			-1.0515	0.0562689	-1.13063	0.119913	-1.14058	0.10283		1.13004	0.237296	1.11249	0.152503	-1.03312	0.130095
ILMN_1217878	XM_193941	4833409A17Rik			-1.17183	0.0607073	-1.24831	0.129671	-1.09026	0.0775337		-1.13206	0.0419392	-1.06192	0.098265	-1.07985	0.0450236
ILMN_1217879	XM_001478939.1	LOC100042777		PREDICTED: Mus musculus similar to human protein homologous to DROER protein (LOC100042777), mRNA.	1.14648	0.0556371	1.62263	0.0320965	1.39603	0.197662		1.01093	0.527171	1.42262	0.34651	1.36511	0.151372
ILMN_1217886	XM_984967.1	LOC675759		PREDICTED: Mus musculus similar to Igh-1a protein (LOC675759), mRNA.	1.00829	0.0532184	2.58806	1.49874	2.49458	1.22693		1.08326	1.40903	2.2798	0.559033	2.69804	0.209726
ILMN_1217889		JeremyReiter_bGalactosidase_40			-1.00426	0.117395	-1.11649	0.0693838	1.04546	0.0964369		1.0031	0.0310285	1.02914	0.0562534	-1.03177	0.0984372
ILMN_1217890	NM_011101.2	Prkca	Pkca	Mus musculus protein kinase C, alpha (Prkca), mRNA.	1.01655	0.081609	-1.01004	0.151048	-1.46524	0.090106		-1.18682	0.12751	-1.34853	0.122613	-1.42013	0.0490721
ILMN_1217892	XR_034637.1	LOC627199		PREDICTED: Mus musculus similar to Der1-like domain family, member 1 (LOC627199), misc RNA.	-1.23759	0.0852734	-1.23285	0.141181	-1.15855	0.101499		1.08397	0.162902	-1.05958	0.118689	1.09014	0.259243
ILMN_1217895	NM_028477.2	Prl8a1	MGC129484; MGC129485; Prlpc4; Plpcd; PLP-Cd; 3830403L08Rik; 1600017L04Rik	Mus musculus prolactin family 8, subfamily a, member 1 (Prl8a1), mRNA.	1.08818	0.142596	1.03767	0.23012	1.0836	0.0914034		-1.06163	0.0623056	-1.20615	0.00873437	-1.06746	0.120733
ILMN_1217896	AK048948	C230084O18Rik			1.02677	0.0604729	1.47358	0.150534	1.77625	0.783292		-1.01486	0.339598	1.17582	0.221492	1.21857	0.307785
ILMN_1217899	AK079693	Itk			1.07031	0.0372904	1.10712	0.164017	1.02381	0.0613994		-1.06371	0.0948639	-1.04628	0.0669724	-1.02422	0.127215
ILMN_1217908	AK043124	A730058G16Rik			-1.06017	0.0368851	-1.15923	0.0398493	-1.12469	0.107454		-1.15375	0.00815243	-1.23986	0.0440145	-1.1116	0.142617
ILMN_1217909	NM_001081293.1	4930535B03Rik	6720469I21Rik; 2810036A19Rik; AL022841; mKIAA0460; AU021304; BB077382; AL022940	Mus musculus RIKEN cDNA 4930535B03 gene (4930535B03Rik), mRNA.	1.08486	0.0193534	-1.00119	0.219226	1.01194	0.101488		1.04434	0.0276118	-1.14653	0.069571	1.03492	0.114836
ILMN_1217913	XM_980391.1	D230007K08Rik		PREDICTED: Mus musculus RIKEN cDNA D230007K08 gene, transcript variant 5 (D230007K08Rik), mRNA.	1.4735	0.171299	1.39221	0.348217	1.48463	0.157637		1.57822	0.10859	1.90794	0.246896	1.56187	0.116018
ILMN_1217917	NM_029264.2	Ttll10	Ttll5; BC042775; 4930595O22Rik; AU022799; 4833412E22Rik	Mus musculus tubulin tyrosine ligase-like family, member 10 (Ttll10), mRNA. XM_922509 XM_990853	-1.05981	0.0488206	-1.11055	0.0204858	-1.02702	0.123718		-1.00806	0.0794606	-1.10936	0.0204024	-1.13108	0.0574983
ILMN_1217919	NM_138598.5	D11Wsu99e	RP23-407I21.2	Mus musculus DNA segment, Chr 11, Wayne State University 99, expressed (D11Wsu99e), mRNA.	-1.05131	0.022547	-1.01735	0.0935011	1.05935	0.164508		1.13308	0.122589	-1.07282	0.023158	-1.13938	0.1772
ILMN_1217926	XM_127591.4	2310021P13Rik			1.06359	0.0976472	1.28651	0.0629159	1.35165	0.0686929		-1.09993	0.325117	1.14051	0.186898	1.25837	0.250608
ILMN_1217927	NM_021888.1	Qtrt1	Tgt; 2610028E17Rik	Mus musculus queuine tRNA-ribosyltransferase 1 (Qtrt1), mRNA.	1.03767	0.0205111	1.2248	0.282242	1.49647	0.125894		-1.08799	0.394307	1.24987	0.260749	1.19733	0.304987
ILMN_1217928	AK082600	C230067O06Rik			-1.02927	0.219035	1.38873	0.078956	1.7225	0.163373		1.00305	0.176552	1.26346	0.0928391	1.23366	0.718167
ILMN_1217929	XR_030797.1	LOC667005		PREDICTED: Mus musculus similar to cyclin B1 (LOC667005), misc RNA.	1.25499	0.219949	2.07518	1.66795	1.58682	0.185626		1.1125	0.456277	3.41539	0.778486	1.53438	0.264686
ILMN_1217931	NM_009462.1	Usp10	mKIAA0190; 2610014N07Rik; Uchrp; UBPO	Mus musculus ubiquitin specific peptidase 10 (Usp10), mRNA.	-1.01354	0.0155912	1.14097	0.128887	-1.00177	0.0795866		-1.311	0.190685	-1.16868	0.120236	-1.05486	0.114711
ILMN_1217937	AK089490	F730039D13Rik			1.0378	0.125613	-1.11296	0.0432306	-1.02093	0.0430574		-1.09102	0.15824	-1.04108	0.0867104	1.03412	0.0773753
ILMN_1217938	AK030964	Akap8			-1.09783	0.107085	-1.13871	0.0787967	-1.04785	0.107666		-1.06875	0.0405718	-1.06271	0.0311369	-1.17682	0.073207
ILMN_1217939	NM_023057.3	B230120H23Rik	AV006891; MLTKalpha; RP23-146F24.1; MLTKbeta; MLTK; Zak	Mus musculus RIKEN cDNA B230120H23 gene (B230120H23Rik), transcript variant 1, mRNA.	1.08065	0.141002	-1.08867	0.25224	-1.11739	0.0450107		-1.08396	0.044183	1.144	0.0535998	-1.06573	0.116602
ILMN_1217943	NM_026908.3	Cab39l	4930520C08Rik; MO2L; 1500031K13Rik; AA589432; 2810425O13Rik	Mus musculus calcium binding protein 39-like (Cab39l), mRNA.	-1.07337	0.008627	-1.34745	0.16024	-1.53721	0.158349		-1.00471	0.178346	-1.67145	0.0589393	-1.38599	0.260498
ILMN_1217946	XM_982597.1	Cabp5		PREDICTED: Mus musculus calcium binding protein 5, transcript variant 2 (Cabp5), mRNA.	1.07766	0.0805227	-1.02749	0.103209	-1.03563	0.0313799		-1.02082	0.0985625	-1.06468	0.0729564	-1.05555	0.0940872
ILMN_1217947	XM_908546.2	LOC436470		PREDICTED: Mus musculus similar to T-cell receptor alpha chain precursor V-J-C region (4I) - mouse (fragment) (LOC436470), mRNA.	1.0113	0.0243964	-1.00184	0.107785	-1.00474	0.0551918		1.10588	0.0821594	-1.04558	0.0401236	1.05634	0.127046
ILMN_1217948	NM_009971.1	Csf3	G-CSF; MGI-IG; Csfg	Mus musculus colony stimulating factor 3 (granulocyte) (Csf3), mRNA.	1.12595	0.0844115	1.08232	0.109454	1.05834	0.0514459		-1.04215	0.139148	1.02	0.0510936	-1.04117	0.0340456
ILMN_1217953	NM_146831.1	Olfr133	MOR256-6	Mus musculus olfactory receptor 133 (Olfr133), mRNA.	1.06305	0.0076221	-1.21702	0.11206	-1.1424	0.089985		1.23112	0.236588	1.0153	0.103036	1.03352	0.12505
ILMN_1217954	NM_001033633.2	Slc2a13	AI505012; A630029G22Rik; 6530403A04; Gm308	Mus musculus solute carrier family 2 (facilitated glucose transporter), member 13 (Slc2a13), mRNA.	-1.1247	0.0728555	-1.01828	0.0611977	-1.10894	0.145068		-1.01011	0.0342823	-1.06347	0.0290062	1.04871	0.109867
ILMN_1217960	AK014030	3110009G19Rik			1.02118	0.014417	1.05168	0.177028	-1.0163	0.132911		-1.13173	0.110579	-1.11401	0.0886226	-1.12356	0.0542967
ILMN_1217961	AK031440	Zfp106			1.12386	0.105182	1.1906	0.234826	1.04364	0.163275		-1.08211	0.222157	-1.15376	0.20047	-1.22571	0.162781
ILMN_1217966	XR_034486.1	1700003H04Rik		PREDICTED: Mus musculus RIKEN cDNA 1700003H04 gene (1700003H04Rik), misc RNA.	-1.08628	0.101337	-1.15494	0.115223	-1.05453	0.100463		-1.07766	0.0519004	-1.08753	0.11481	-1.13249	0.0408797
ILMN_1217969	NM_026730.1	Gpihbp1	1110002J19Rik; GPI-HBP1	Mus musculus GPI-anchored HDL-binding protein 1 (Gpihbp1), mRNA.	1.12007	0.216121	1.05952	0.0819679	1.29938	0.18621		1.03489	0.111397	1.09403	0.0554616	1.08149	0.209712
ILMN_1217972	XM_194860.2	LOC271048			-1.0212	0.116226	-1.05368	0.559251	1.01675	0.167647		-1.00112	0.0129185	1.71227	0.381009	1.47413	0.351254
ILMN_1217978	NM_010453.2	Hoxa5			-1.0661	0.105898	1.37089	0.188839	1.32856	0.148358		1.16498	0.211537	1.69899	0.232522	1.34688	0.0735839
ILMN_1217982	XM_001473382.1	LOC100039829		PREDICTED: Mus musculus similar to putative, transcript variant 1 (LOC100039829), mRNA.	-1.06791	0.0483756	-1.07365	0.0515558	-1.0541	0.112821		-1.09573	0.105619	-1.21755	0.145474	-1.16896	0.0501954
ILMN_1217983	XM_356766.1	LOC382953			-1.08354	0.171671	-1.11755	0.0415597	-1.10677	0.0810363		1.05778	0.197451	1.02437	0.179694	-1.03888	0.0427049
ILMN_1217984	NM_133975.4	Trip12	6720416K24Rik; 1110036I07Rik; AA410158; MGC31615; Gtl6	Mus musculus thyroid hormone receptor interactor 12 (Trip12), mRNA.	1.0131	0.0608152	-1.01144	0.149282	-1.21958	0.0438392		1.14298	0.100813	1.28274	0.200725	1.25823	0.502489
ILMN_1217986	AK039239	A330004N04Rik			-1.0485	0.0712506	-1.11873	0.070633	-1.10807	0.0800834		1.01548	0.0134409	-1.10635	0.051714	-1.24285	0.159927
ILMN_1217990	XM_125802.2	LOC216178			1.00801	0.0784842	1.01862	0.200187	-1.05655	0.0941105		-1.00826	0.0941621	-1.24191	0.0802465	-1.00696	0.107011
ILMN_1217991	NM_177387.3	Ust	D930010O20Rik	Mus musculus uronyl-2-sulfotransferase (Ust), mRNA.	1.04692	0.167912	1.20779	0.0997946	1.0319	0.200227		1.22065	0.12985	1.28723	0.0805445	1.19267	0.140655
ILMN_1217993	NM_080471.2	Ankrd6			1.08466	0.0223496	1.1225	0.124056	1.15471	0.125856		-1.08805	0.159836	-1.0028	0.0438918	-1.02295	0.145558
ILMN_1217998	XM_487678	Epb4.1l1			-1.05383	0.198254	1.12761	0.110034	1.39233	0.0914998		-1.08237	0.183509	1.03526	0.152493	1.04125	0.568153
ILMN_1217999	NM_177096.2	B430203M17Rik		Mus musculus RIKEN cDNA B430203M17 gene (B430203M17Rik), mRNA.	1.07004	0.0765293	1.02322	0.208001	-1.02896	0.0902214		-1.04353	0.00616789	-1.09885	0.0625976	1.0003	0.120743
ILMN_1218000	AK040719	A530020A01Rik			1.00539	0.187188	1.03004	0.11476	-1.14379	0.10181		1.00719	0.0815575	1.07956	0.12603	1.1464	0.30023
ILMN_1218006	XM_001477466.1	LOC100047132		PREDICTED: Mus musculus similar to monoclonal antibody 17-1A, light chain (LOC100047132), mRNA.	-1.07957	0.0763605	3.06757	3.75115	13.8462	2.86695		1.004	1.64459	5.99071	1.69494	20.8799	6.16745
ILMN_1218007	NM_030557.2	Mynn	AA415053; Mynr; SBBIZ1; AI661031; AW049392; 2810011C24Rik	Mus musculus myoneurin (Mynn), mRNA.	-1.09408	0.0528978	-1.15377	0.0519778	-1.05255	0.0140098		-1.01022	0.010732	-1.08474	0.128899	-1.00331	0.0502071
ILMN_1218011	AK085011	D430024I10Rik			-1.04303	0.160608	-1.10214	0.0519644	-1.00822	0.0915195		-1.06533	0.0491619	-1.01579	0.107435	-1.04636	0.0304502
ILMN_1218012	XR_031663.1	Itih5l		PREDICTED: Mus musculus inter-alpha (globulin) inhibitor H5-like (Itih5l), misc RNA.	-1.0041	0.0349425	-1.067	0.0491419	-1.07943	0.111468		1.00637	0.117397	-1.03893	0.0695769	1.02896	0.0445985
ILMN_1218014	NM_019704.2	Tmem115	C78915; Pl6; Pp6	Mus musculus transmembrane protein 115 (Tmem115), mRNA.	1.03434	0.142622	1.1383	0.179962	1.22169	0.0778055		-1.15287	0.146454	-1.06198	0.129896	1.0523	0.436692
ILMN_1218015	NM_145576.1	Zfp212	mKIAA3011; Znf212	Mus musculus Zinc finger protein 212 (Zfp212), mRNA.	-1.0459	0.12614	-1.17139	0.0388569	-1.05901	0.146811		-1.06378	0.127535	-1.09166	0.0857141	-1.32654	0.156782
ILMN_1218016	NM_009153	Sema3b			-1.05386	0.0341629	-1.02773	0.0281419	-1.10752	0.0902736		1.14221	0.0802482	-1.03705	0.0828315	1.02545	0.103376
ILMN_1218024	AK006635	Arhgef6			1.05084	0.164527	1.26403	0.0729661	1.22444	0.102398		-1.02907	0.145276	1.25678	0.0446796	1.18587	0.0556883
ILMN_1218026	NM_026138.2	6330407J23Rik		Mus musculus RIKEN cDNA 6330407J23 gene (6330407J23Rik), mRNA.	1.00682	0.0682877	-1.09256	0.0429083	-1.08575	0.154409		1.1459	0.044533	1.06318	0.0840496	1.11557	0.163013
ILMN_1218028	AK031339	6030408K21Rik			1.08463	0.194886	1.00288	0.162693	-1.04687	0.0939534		-1.02465	0.0706846	-1.19656	0.0744844	-1.03158	0.0253353
ILMN_1218030	XM_358846.1	LOC385651			1.00502	0.0368242	-1.03345	0.123564	-1.00286	0.061902		1.02751	0.220974	1.04506	0.0118345	-1.00149	0.0515606
ILMN_1218033	AK029341	4932417H02Rik			1.09004	0.0332093	1.00118	0.079574	1.08214	0.150273		1.00957	0.132102	-1.1036	0.0765159	-1.03614	0.0712533
ILMN_1218034	NM_029857.2	Tmco4	4632413C14Rik; AI430825	Mus musculus transmembrane and coiled-coil domains 4 (Tmco4), mRNA.	1.07007	0.0436288	1.01005	0.043353	1.31325	0.124504		-1.05246	0.113703	-1.07494	0.123693	-1.14447	0.545604
ILMN_1218036	NM_001040026.1	Sco1	D11Bwg1310e; 2610001C07Rik	Mus musculus SCO cytochrome oxidase deficient homolog 1 (yeast) (Sco1), nuclear gene encoding mitochondrial protein, mRNA.	-1.01068	0.059196	-1.25583	0.12175	-1.44309	0.0175503		-1.16903	0.0594063	-1.41179	0.0260127	-1.49092	0.0610877
ILMN_1218037	NM_146260.2	Tmie	sr; Mm.87012; 5131400L21Rik	Mus musculus transmembrane inner ear (Tmie), mRNA.	1.28392	0.224491	-2.25709	0.204387	-2.77282	0.0258021		-1.03339	0.422102	-4.06963	0.0158255	-2.86161	0.0476341
ILMN_1218040	XM_356689.1	LOC382810			1.02094	0.0224822	-1.15905	0.0735225	-1.04737	0.0616954		1.05653	0.0875303	1.12019	0.271161	1.00442	0.107777
ILMN_1218041	NM_146235	BC004701			-1.02206	0.136393	1.21415	0.0745919	1.11796	0.057939		-1.08636	0.210396	1.19382	0.0959707	1.00427	0.0901415
ILMN_1218042	XM_357088.1	LOC383483			1.24838	0.156454	1.15572	0.242046	1.084	0.092295		1.05677	0.135704	1.14075	0.174988	-1.01532	0.16689
ILMN_1218043	AK035833	9630009A08Rik			-1.23254	0.0867602	-1.42096	0.315446	-1.22405	0.137994		-1.25883	0.130727	1.04888	0.183087	-1.10339	0.192664
ILMN_1218044	AK020406	9430006E19Rik			1.10111	0.169452	1.05926	0.0995431	1.0707	0.113867		-1.07985	0.0551786	1.00494	0.0368685	1.06198	0.0244406
ILMN_1218051	NM_027711.1	Iqgap2	A630053O10; 4933417J23Rik	Mus musculus IQ motif containing GTPase activating protein 2 (Iqgap2), mRNA.	-1.46925	0.184483	-2.08424	0.068569	-2.70302	0.206625		-1.16329	0.275663	-1.73929	0.0975233	-1.27322	0.33692
ILMN_1218057	NM_017467.2	Zfp316	MZF-3; Emzf1	Mus musculus zinc finger protein 316 (Zfp316), mRNA.	1.00179	0.0707966	-1.21331	0.077883	1.01915	0.131638		-1.12591	0.0644544	-1.28866	0.0589436	1.00047	0.10128
ILMN_1218058	NM_144900.1	Atp1a1	Atpa-1; MGC38419; BC010319	Mus musculus ATPase, Na+/K+ transporting, alpha 1 polypeptide (Atp1a1), mRNA.	-1.14198	0.0445121	1.07367	0.0747197	1.09135	0.0951349		-1.0317	0.0963232	1.16842	0.073481	1.17209	0.0639651
ILMN_1218062	AK020397	IRAK			-1.03895	0.0450556	-1.00468	0.112937	-1.00527	0.140652		-1.05963	0.0320147	1.02084	0.0956317	-1.11121	0.00766897
ILMN_1218067	XM_357564.1	LOC384315			-1.13156	0.215785	-1.06057	0.0988671	-1.09216	0.187295		-1.10048	0.0801462	-1.02112	0.0955604	-1.14137	0.153405
ILMN_1218069	NM_021367.1	Tslp		Mus musculus thymic stromal lymphopoietin (Tslp), mRNA.	1.0651	0.0684097	1.22392	0.335078	1.24609	0.241269		1.12459	0.17824	1.34502	0.147095	1.11009	0.127092
ILMN_1218070	XM_919897.2	Gm5		PREDICTED: Mus musculus gene model 5, (NCBI) (Gm5), mRNA.	-1.07926	0.0572143	1.06596	0.105181	-1.04691	0.0776115		1.03288	0.068769	1.04511	0.0151797	1.03386	0.0874696
ILMN_1218075	NM_181849.2	Fgb	2510049G14Rik	Mus musculus fibrinogen, B beta polypeptide (Fgb), mRNA.	-1.00012	0.192768	1.36319	0.103778	1.72165	0.464415		-1.14979	0.217083	1.55926	0.385791	1.82877	0.637739
ILMN_1218078	NM_001005506.2	Txlna	Txln; AW209241; Il14; MGC77972; AI425952; MGC86145; 2600010N21Rik	Mus musculus taxilin alpha (Txlna), mRNA.	1.08739	0.053809	1.5895	0.19375	1.4345	0.214122		-1.25168	0.614819	1.26546	0.339283	1.36501	0.175177
ILMN_1218079	XM_359075.1	LOC386117			-1.11987	0.0604749	-1.25409	0.0679829	-1.17332	0.0949211		-1.24451	0.176066	-1.40837	0.127366	-1.36463	0.221328
[truncated: 20,006 more rows]
